# Supplementary material for: Relationships between putative G-quadruplex-forming sequences, RecQ helicases, and transcription
Source: PubMed Central journal article supplement (PMC4599794; doi:10.1186/s12881-015-0236-4), 2015-10-08
Supplement: 12881_2015_236_MOESM23_ESM.pdf [file 12881_2015_236_MOESM23_ESM.pdf]

Supporting Online Material for

**Putative G-quadruplex forming sequence signatures  
in genes differentially transcribed  
upon loss of BLM or WRN helicases**

John Smestad<sup>1</sup> and L. James Maher III<sup>2</sup>

<sup>1</sup>Mayo Clinic Medical Scientist Training Program

<sup>2</sup>Department of Biochemistry and Molecular Biology

Mayo Clinic College of Medicine

200 First St. SW, Rochester, MN 55905, USA

\*To whom correspondence should be addressed. E-mail: [maher@mayo.edu](mailto:maher@mayo.edu)

**This PDF file includes:**

Figures S1 to S3

Tables S1 to S7

**Figure S1.** Overlap Analysis of Genes Differentially-Expressed in BS and WS..... 3

**Table S1.** PQS Prevalence in Promoters of BS and WS Differentially-Expressed Genes..... 4

**Figure S2.** PQS Abundance Histograms of BS and WS Differentially-Expressed Genes..... 5

**Table S2.** Positions of PQS Excess/Scarcity in BS and WS Differentially-Expressed Genes ..... 6

**Table S3.** Statistics for Analysis of PQS Abundance in BS and WS Differentially-Expressed Genes..... 7

**Figure S3.** Epigenomic Track Correlations with Gene Expression ..... 8

**Table S4.** Statistics for Analysis of PQS Genome-Wide Transcriptional Effects..... 9

**Table S5.** Statistics for Correlation of Epigenomic Tracks with Gene Expression. .... 10

**Table S6.** Bayesian Linear Regression Modeling Parameters ..... 11

**Table S7.** Analysis of PQS Motifs in BS and WS Differentially-Expressed Genes ..... 12

**Figure S1.** Overlap analysis of genes differentially-expressed in BS and WS.

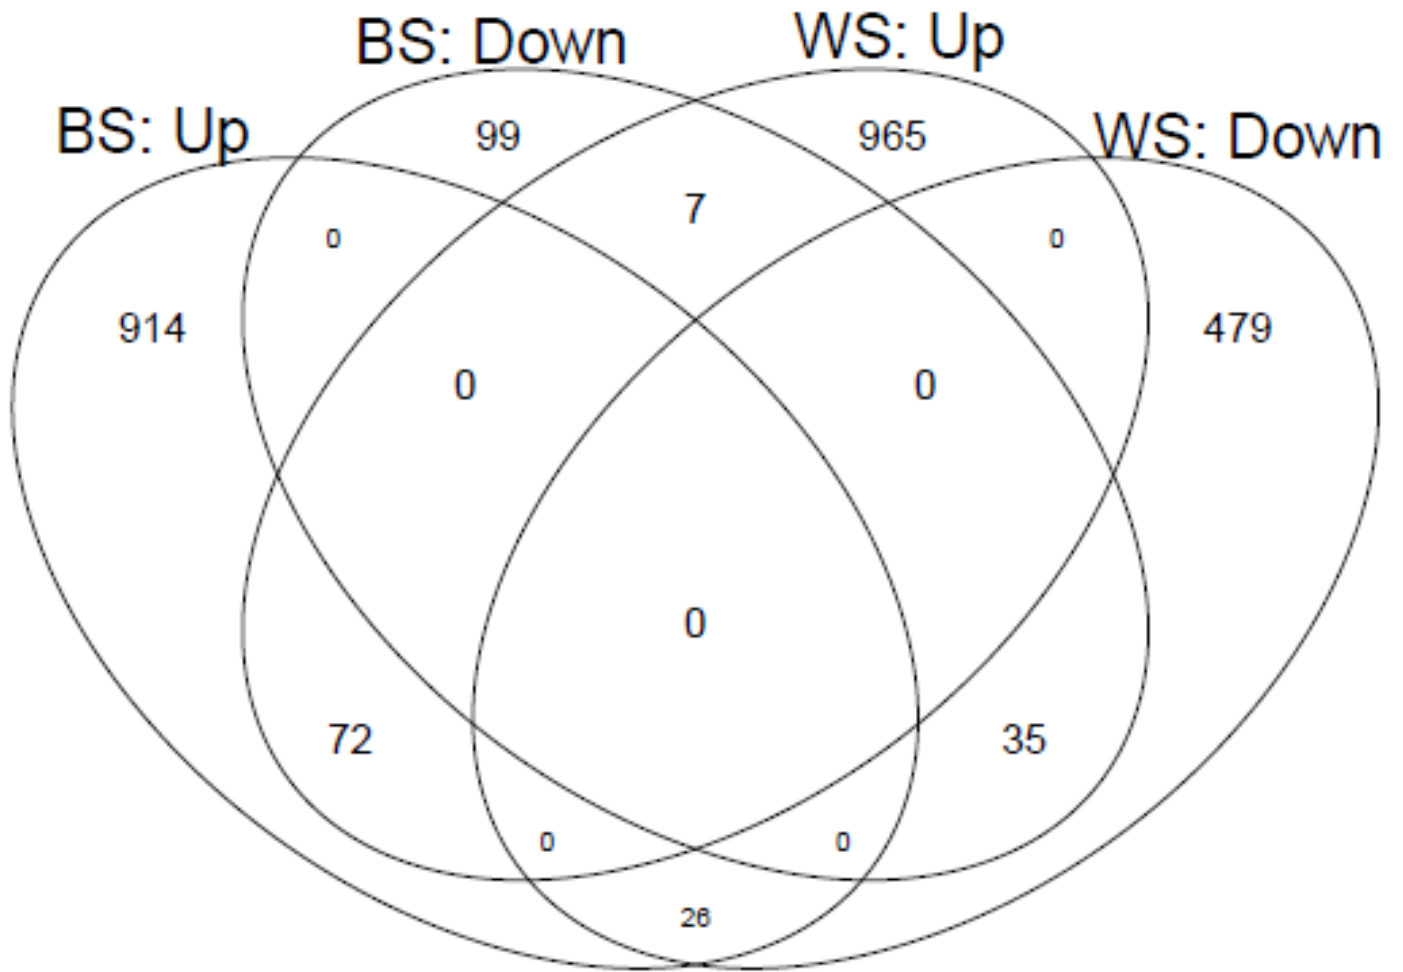

**Table S1.** PQS prevalence in promoters of BS and WS differentially-expressed genes.

|                                                   | Whole Genome | Bloom Syndrome |                | Werner Syndrome |                |
|---------------------------------------------------|--------------|----------------|----------------|-----------------|----------------|
|                                                   |              | Up-Regulated   | Down-Regulated | Up-Regulated    | Down-Regulated |
| <b>Total Genes</b>                                | 50541        | 1012           | 141            | 1046            | 540            |
| <b>Genes Overlapping GENOCDE v7 Annotations</b>   | 50541        | 967            | 134            | 919             | 498            |
| <b>% Genes Overlapping GENCODE v7 Annotations</b> | 100          | 96             | 95             | 88              | 92             |
| <b>GENCODE Genes with <math>\geq 1</math> PQS</b> | 27627        | 817            | 121            | 678             | 417            |
| <b>GENCODE Genes with No PQS</b>                  | 22914        | 150            | 13             | 241             | 81             |
| <b>% GENCODE Genes with PQS</b>                   | 55           | 84             | 90             | 74              | 84             |

**Figure S2.** PQS abundance histograms of BS and WS differentially-expressed genes. Plots show positions of PQS near gene promoters genome-wide and in the subset of genes differentially expressed in BS and WS, assigned to sense (S) and antisense (AS) strand components. Histogram counts represent a 100-bp bin width spanning 2 kbp upstream and downstream of the TSS.

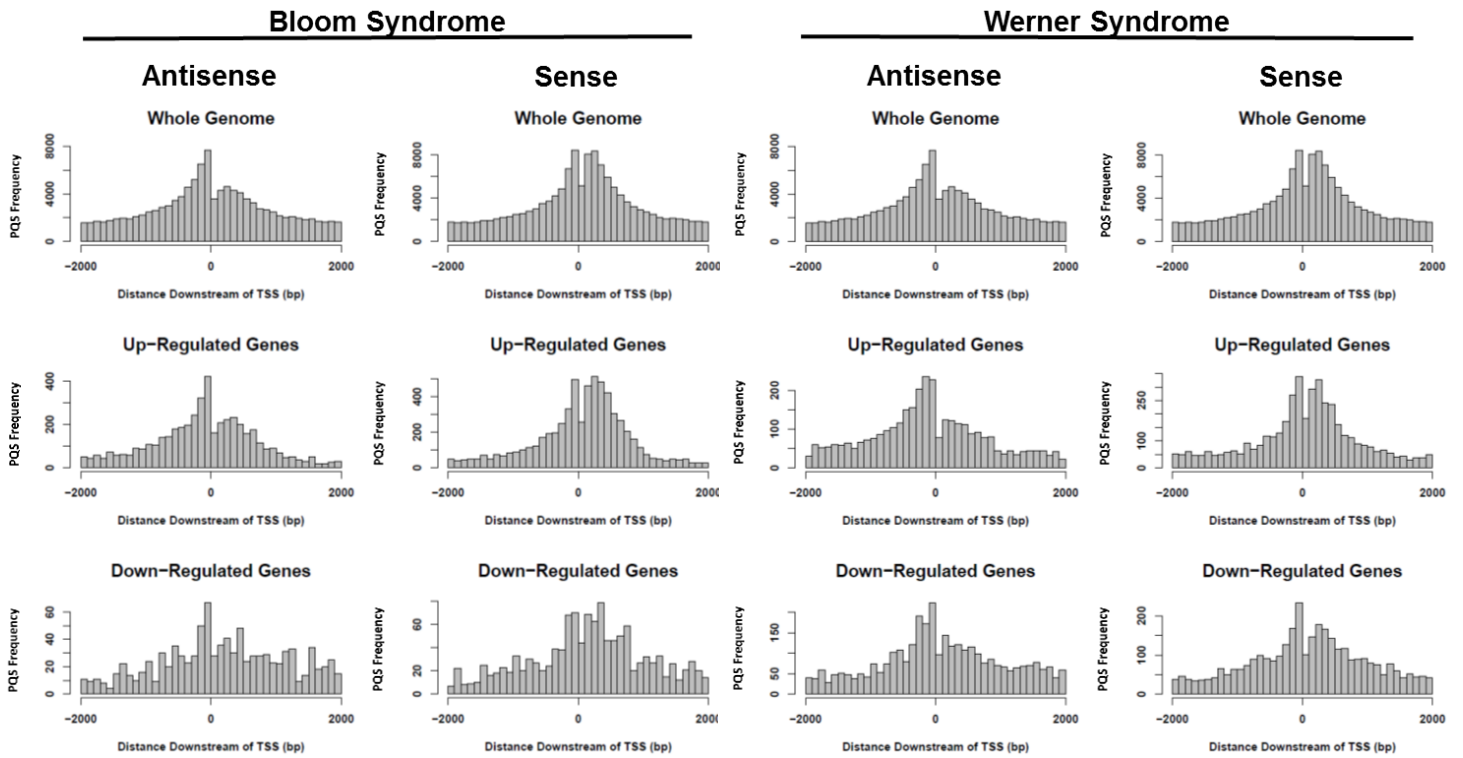

**Table S2.** Positions of statistically-significant PQS abundance excess and scarcity near the promoters of genes differentially expressed in BS and WS. Analysis is by antisense (AS) and sense (S) strands. Numbered regions correspond to the midpoint location of 200-bp bins used to compare numbers of PQS per TSS between differentially-expressed genes and the remainder of the human genome. All regions satisfy the criterion that the p-value is lower than the threshold p-value determined by statistical bootstrapping simulation using random gene sets.

|                                     |                                                                                                                                             |
|-------------------------------------|---------------------------------------------------------------------------------------------------------------------------------------------|
| <b>BS Up-Regulated: Antisense</b>   |                                                                                                                                             |
| Enrichment:                         |                                                                                                                                             |
| Depletion:                          | -1900:-1870, -1800:-1780, -1750:-1690, -1640:-1630, -1450, -1430:-1260, 890:910, 1010:1900                                                  |
| <b>BS Up-Regulated: Sense</b>       |                                                                                                                                             |
| Enrichment:                         | -60:-50, -30, 160:680                                                                                                                       |
| Depletion:                          | -1900:-1100, -1080, 990:1900                                                                                                                |
| <b>BS Down-Regulated: Antisense</b> |                                                                                                                                             |
| Enrichment:                         | 370, 450, 1090:1280, 1490:1610, 1710:1840                                                                                                   |
| Depletion:                          |                                                                                                                                             |
| <b>BS Down-Regulated: Sense</b>     |                                                                                                                                             |
| Enrichment:                         | -1360, -950:-940, -880:-870, -230:-210, -190:-80, 130, 280:320, 340, 360:430, 530:550, 570:830, 1010, 1030:1090, 1130:1260, 1670, 1690:1800 |
| Depletion:                          |                                                                                                                                             |
| <b>WS Up-Regulated: Antisense</b>   |                                                                                                                                             |
| Enrichment:                         |                                                                                                                                             |
| Depletion:                          | 10:70, 140:170, 320, 920:1360                                                                                                               |
| <b>WS Up-Regulated: Sense</b>       |                                                                                                                                             |
| Enrichment:                         |                                                                                                                                             |
| Depletion:                          | 1490:1790                                                                                                                                   |
| <b>WS Down-Regulated: Antisense</b> |                                                                                                                                             |
| Enrichment:                         | -710:-520, -370:270, 300:380, 400:1040, 1130:1190, 1250:1840, 1870:1890                                                                     |
| Depletion:                          |                                                                                                                                             |
| <b>WS Down-Regulated: Sense</b>     |                                                                                                                                             |
| Enrichment:                         | -840:-560, -270, -250:-230, -190:-40, 830:930, 990:1080, 1100:1110, 1130:1160, 1310:1450                                                    |
| Depletion:                          |                                                                                                                                             |

**Table S3.** Statistics for analysis of PQS abundance in BS and WS differentially-expressed genes.

|                                              | Genome-Wide | Bloom Syndrome |                | Werner Syndrome |                |
|----------------------------------------------|-------------|----------------|----------------|-----------------|----------------|
|                                              |             | Up-Regulated   | Down-Regulated | Up-Regulated    | Down-Regulated |
| <b>Genes</b>                                 | 50541       | 1012           | 141            | 1046            | 540            |
| <b>TSS in Gene Dataset</b>                   | 139700      | 6814           | 794            | 4850            | 2764           |
| <b>PQS within 2 kb of a TSS</b>              | 251386      | 10963          | 2227           | 7685            | 6680           |
| <b>Average Number PQS per TSS</b>            | 1.80        | 1.61           | 2.80           | 1.58            | 2.42           |
| <b>Analysis of Antisense Strand:</b>         |             |                |                |                 |                |
| <b>False Discovery Bin Fraction</b>          | -           | 0.01           | 0.01           | 0.01            | 0.01           |
| <b>Threshold P-Value</b>                     | -           | 1.1E-05        | 1.5E-07        | 5.7E-06         | 6.1E-06        |
| <b>Predicted Number of False Discoveries</b> | -           | 3.81           | 3.81           | 3.81            | 3.81           |
| <b>Number of Discoveries in Dataset</b>      | -           | 128            | 49             | 57              | 229            |
| <b>False Discovery Rate</b>                  | -           | 0.03           | 0.08           | 0.07            | 0.02           |
| <b>Analysis of Sense Strand:</b>             |             |                |                |                 |                |
| <b>False Discovery Bin Fraction</b>          | -           | 0.01           | 0.01           | 0.01            | 0.01           |
| <b>Threshold P-Value</b>                     | -           | 3.9E-06        | 2.3E-07        | 1.1E-06         | 3.5E-06        |
| <b>Predicted Number of False Discoveries</b> | -           | 3.81           | 3.81           | 3.81            | 3.81           |
| <b>Number of Discoveries in Dataset</b>      | -           | 230            | 100            | 31              | 91             |
| <b>False Discovery Rate</b>                  | -           | 0.02           | 0.04           | 0.12            | 0.04           |

**Figure S3.** Epigenomic track correlations with gene expression. Log<sub>2</sub>-transformed epigenomic track feature correlations with log<sub>2</sub>-transformed gene expression. The “bestbin” location for a particular feature was determined as the location with the highest absolute value correlation with expression. Bins were 100 bp in width and covered end-to-end the 1 kbp upstream and downstream of the TSS, giving a total of 20 bins. For the generation of this figure, a pseudocount equal to 0.25% of the maximal bin value was added to epigenetic track signals in order to avoid the log<sub>2</sub>(0) issue.

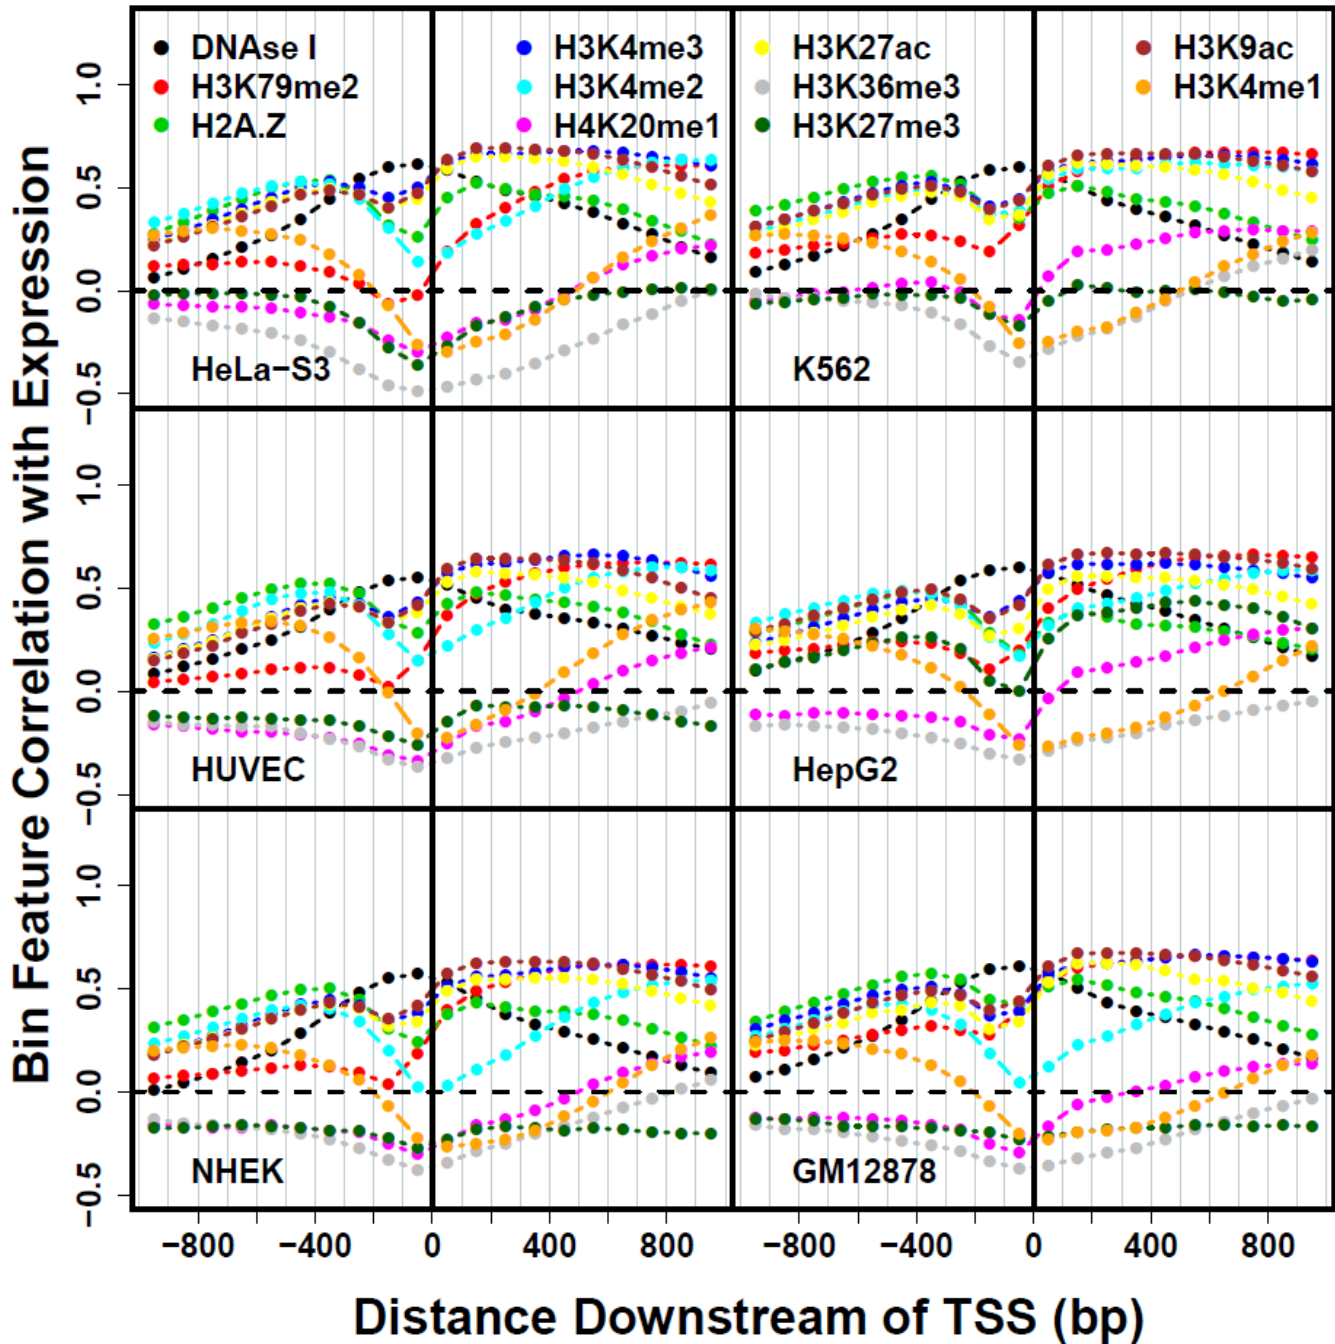



**Table S4.** Statistics for analysis of PQS genome-wide transcriptional effects.

|                                              | H1-hESC | HeLa-S3 | K562  | HUVEC | HepG2 | NHEK  | GM12878 |
|----------------------------------------------|---------|---------|-------|-------|-------|-------|---------|
| <b>Total TSS in Dataset</b>                  | 9614    | 6909    | 7484  | 5578  | 7659  | 4011  | 4447    |
| <b>TSS with <math>\geq 1</math> PQS</b>      | 6919    | 4172    | 5076  | 3655  | 5416  | 2728  | 2974    |
| <b>TSS with no PQS</b>                       | 2695    | 2737    | 2408  | 1923  | 2243  | 1283  | 1473    |
| <b>TSS where Nearest PQS is on TS</b>        | 3121    | 1849    | 2272  | 1616  | 2388  | 1181  | 1302    |
| <b>TSS where Nearest PQS is on Non-TS</b>    | 3798    | 2323    | 2804  | 2039  | 3028  | 1547  | 1672    |
| <b>Bayesian Modeling Correlation</b>         | 0.72    | 0.75    | 0.70  | 0.68  | 0.64  | 0.63  | 0.64    |
| <b>Bayesian Modeling RMSE</b>                | 2.9     | 3.0     | 3.0   | 3.1   | 2.9   | 3.2   | 3.2     |
| <b>Analysis of Antisense Strand:</b>         |         |         |       |       |       |       |         |
| <b>False Discovery Bin Fraction</b>          | 0.01    | 0.01    | 0.01  | 0.01  | 0.01  | 0.01  | 0.01    |
| <b>Threshold P-Value</b>                     | 0.017   | 0.014   | 0.015 | 0.012 | 0.017 | 0.010 | 0.014   |
| <b>Predicted Number of False Discoveries</b> | 3.81    | 3.81    | 3.81  | 3.81  | 3.81  | 3.81  | 3.81    |
| <b>Number of Discoveries in Dataset</b>      | 77      | 70      | 97    | 50    | 23    | 39    | 8       |
| <b>False Discovery Rate</b>                  | 0.049   | 0.054   | 0.039 | 0.076 | 0.166 | 0.098 | 0.476   |
| <b>Analysis of Sense Strand:</b>             |         |         |       |       |       |       |         |
| <b>False Discovery Bin Fraction</b>          | 0.01    | 0.01    | 0.01  | 0.01  | 0.01  | 0.01  | 0.01    |
| <b>Threshold P-Value</b>                     | 0.012   | 0.012   | 0.011 | 0.011 | 0.014 | 0.015 | 0.015   |
| <b>Predicted Number of False Discoveries</b> | 3.81    | 3.81    | 3.81  | 3.81  | 3.81  | 3.81  | 3.81    |
| <b>Number of Discoveries in Dataset</b>      | 57      | 55      | 53    | 13    | 33    | 46    | 7       |
| <b>False Discovery Rate</b>                  | 0.067   | 0.069   | 0.072 | 0.293 | 0.115 | 0.083 | 0.544   |

**Table S5.** Correlations of GC fraction and “bestbin” log<sub>2</sub>-transformed epigenetic tracks with log<sub>2</sub>-transformed gene expression. GC fraction is calculated for 5 kbp upstream of each TSS. Epigenetic track correlation values in this table represent the highest absolute value correlations determined by selecting both optimal bin and pseudocount for each track. Bins were 100 bp in width and covered end-to-end the 1 kbp upstream and downstream of the TSS, giving a total of 20 bins. Pseudocounts ranging from 0.25-4% of the maximal bin value were added to each bin prior to log<sub>2</sub> transformation in order to avoid the log<sub>2</sub>(0) issue.

|                    | H1-hESC |         | HeLa-S3 |         | K562  |         | HUVEC |         | HepG2 |         | NHEK  |         | GM12878 |         |
|--------------------|---------|---------|---------|---------|-------|---------|-------|---------|-------|---------|-------|---------|---------|---------|
|                    | Cor.    | P-Value | Cor.    | P-Value | Cor.  | P-Value | Cor.  | P-Value | Cor.  | P-Value | Cor.  | P-Value | Cor.    | P-Value |
| <b>GC Fraction</b> | 0.01    | 0.62    | 0.03    | 0.01    | 0.00  | 0.78    | 0.04  | 0.00    | 0.02  | 0.15    | -0.01 | 0.65    | -0.01   | 0.51    |
| <b>DNase 1</b>     | 0.46    | 0.00    | 0.65    | 0.00    | 0.57  | 0.00    | 0.50  | 0.00    | 0.50  | 0.00    | 0.50  | 0.00    | 0.53    | 0.00    |
| <b>H3K79me2</b>    | 0.58    | 0.00    | 0.59    | 0.00    | 0.62  | 0.00    | 0.54  | 0.00    | 0.56  | 0.00    | 0.51  | 0.00    | 0.52    | 0.00    |
| <b>H2AZ</b>        | 0.43    | 0.00    | 0.58    | 0.00    | 0.51  | 0.00    | 0.47  | 0.00    | 0.36  | 0.00    | 0.40  | 0.00    | 0.48    | 0.00    |
| <b>H3K4me3</b>     | 0.64    | 0.00    | 0.70    | 0.00    | 0.62  | 0.00    | 0.62  | 0.00    | 0.57  | 0.00    | 0.53  | 0.00    | 0.56    | 0.00    |
| <b>H3K4me2</b>     | 0.52    | 0.00    | 0.64    | 0.00    | 0.59  | 0.00    | 0.53  | 0.00    | 0.48  | 0.00    | 0.45  | 0.00    | 0.42    | 0.00    |
| <b>H4K20me1</b>    | -0.26   | 0.00    | -0.31   | 0.00    | 0.23  | 0.00    | -0.31 | 0.00    | 0.24  | 0.00    | -0.28 | 0.00    | -0.30   | 0.00    |
| <b>H3K27ac</b>     | 0.59    | 0.00    | 0.68    | 0.00    | 0.58  | 0.00    | 0.53  | 0.00    | 0.51  | 0.00    | 0.46  | 0.00    | 0.52    | 0.00    |
| <b>H3K36me3</b>    | -0.28   | 0.00    | -0.50   | 0.00    | -0.32 | 0.00    | -0.33 | 0.00    | -0.28 | 0.00    | -0.30 | 0.00    | -0.33   | 0.00    |
| <b>H3K27me3</b>    | -0.28   | 0.00    | -0.36   | 0.00    | -0.19 | 0.00    | -0.22 | 0.00    | 0.43  | 0.00    | -0.20 | 0.00    | -0.21   | 0.00    |
| <b>H3K9ac</b>      | 0.64    | 0.00    | 0.71    | 0.00    | 0.62  | 0.00    | 0.61  | 0.00    | 0.58  | 0.00    | 0.53  | 0.00    | 0.57    | 0.00    |
| <b>H3K4me1</b>     | 0.23    | 0.00    | 0.39    | 0.00    | 0.18  | 0.00    | 0.33  | 0.00    | 0.14  | 0.00    | -0.32 | 0.00    | 0.10    | 0.00    |

**Table S6.** Bayesian linear regression modeling parameters for the seven human cell lines used in epigenetic modeling of gene expression.

|                    | <b>H1-hESC</b> | <b>HeLa-S3</b> | <b>K562</b> | <b>HUVEC</b> | <b>HepG2</b> | <b>NHEK</b> | <b>GM12878</b> |
|--------------------|----------------|----------------|-------------|--------------|--------------|-------------|----------------|
| <b>GC Fraction</b> | -0.039         | -0.102         | -0.141      | -0.108       | -0.111       | 0.024       | -0.172         |
| <b>DNase 1</b>     | 0.272          | 0.273          | 0.492       | 0.222        | 0.187        | 0.354       | 0.207          |
| <b>H3K79me2</b>    | 0.244          | -0.010         | 0.422       | 0.290        | -0.032       | 0.318       | -0.148         |
| <b>H2AZ</b>        | 0.044          | 0.143          | 0.063       | 0.081        | 0.287        | 0.096       | 0.227          |
| <b>H3K4me3</b>     | 0.257          | 0.077          | 0.053       | -0.353       | -0.049       | 0.000       | -0.065         |
| <b>H3K4me2</b>     | -0.051         | 0.045          | -0.142      | 0.263        | -0.064       | -0.071      | 0.019          |
| <b>H4K20me1</b>    | -0.124         | -0.104         | 0.002       | -0.133       | 0.017        | 0.140       | 0.209          |
| <b>H3K27ac</b>     | 0.120          | -0.177         | 0.134       | -0.170       | 0.301        | -0.092      | 0.014          |
| <b>H3K36me3</b>    | 0.026          | 0.015          | -0.078      | -0.040       | 0.127        | -0.034      | 0.075          |
| <b>H3K27me3</b>    | -0.133         | -0.031         | -0.076      | 0.015        | -0.012       | -0.125      | 0.010          |
| <b>H3K9ac</b>      | 0.030          | 0.210          | 0.013       | 0.167        | -0.042       | 0.076       | 0.028          |
| <b>H3K4me1</b>     | -0.029         | 0.010          | -0.099      | -0.014       | 0.054        | 0.065       | 0.047          |

**Table S7.** Analysis of PQS motifs in genes differentially expressed in BS and WS. (A) FDR for the binned analysis in Figure 4, with FDR calculated as the ratio of statistically-significant bins in BS and WS compared to the average statistically-significant bin number in randomly-generated datasets containing the same number of genes as the test datasets. (B) Average PQS feature values for whole genome sense (S) and antisense (AS) strands, and for the subset of genes up-regulated or down-regulated in BS and WS. Signals are averaged over the entire 2 kbp upstream and downstream of the TSS. Percent difference from the average genomic value is shown.

A)

| False Discovery Rates        |                  |                   |                    |                    |               |               |               |              |
|------------------------------|------------------|-------------------|--------------------|--------------------|---------------|---------------|---------------|--------------|
|                              | Fraction Adenine | Fraction Cytosine | Fraction Thymidine | Number of G Stacks | Loop 1 Length | Loop 2 Length | Loop 3 Length | Total Length |
| BS Up-Regulated: Antisense   | 0.002            | 0.003             | 0.001              | 0.002              | Inf           | Inf           | 0.001         | 0.002        |
| BS Down-Regulated: Antisense | 0.003            | 0.006             | 0.002              | 0.002              | 0.030         | Inf           | Inf           | 0.003        |
| WS Up-Regulated: Antisense   | 0.733            | Inf               | 0.111              | Inf                | 0.553         | 0.385         | 0.086         | 0.235        |
| WS Down-Regulated: Antisense | Inf              | 0.144             | 0.125              | Inf                | Inf           | 0.102         | Inf           | Inf          |
| BS Up-Regulated: Sense       | 0.002            | 0.003             | 0.002              | Inf                | Inf           | 0.002         | Inf           | 0.002        |
| BS Down-Regulated: Sense     | 0.016            | 0.003             | 0.002              | Inf                | Inf           | 0.026         | Inf           | Inf          |
| WS Up-Regulated: Sense       | 0.176            | 0.202             | Inf                | 0.180              | Inf           | Inf           | Inf           | 0.196        |
| WS Down-Regulated: Sense     | Inf              | Inf               | Inf                | 0.455              | 0.166         | Inf           | 0.805         | Inf          |

B)

|                              | Fraction Adenine |       | Fraction Cytosine |       | Fraction Thymidine |       | Number of G Stacks |       | Loop 1 Length |       | Loop 2 Length |       | Loop 3 Length |       | Total Length |       |
|------------------------------|------------------|-------|-------------------|-------|--------------------|-------|--------------------|-------|---------------|-------|---------------|-------|---------------|-------|--------------|-------|
|                              | Value            | % Dif | Value             | % Dif | Value              | % Dif | Value              | % Dif | Value         | % Dif | Value         | % Dif | Value         | % Dif | Value        | % Dif |
| Whole Genome: Antisense      | 0.113            | -     | 0.127             | -     | 0.082              | -     | 4.729              | -     | 3.465         | -     | 3.423         | -     | 3.448         | -     | 29.44        | -     |
| Whole Genome: Sense          | 0.105            | -     | 0.132             | -     | 0.088              | -     | 4.738              | -     | 3.506         | -     | 3.415         | -     | 3.445         | -     | 29.45        | -     |
| BS Up-Regulated: Antisense   | 0.117            | 3.6   | 0.122             | -3.8  | 0.063              | -22.7 | 4.604              | -2.6  | 3.404         | -1.8  | 3.604         | 5.3   | 3.236         | -6.2  | 28.70        | -2.5  |
| BS Down-Regulated: Antisense | 0.105            | -7.4  | 0.121             | -4.7  | 0.093              | 14.1  | 4.535              | -4.1  | 3.201         | -7.6  | 3.613         | 5.6   | 3.397         | -1.5  | 27.94        | -5.1  |
| WS Up-Regulated: Antisense   | 0.116            | 2.4   | 0.129             | 1.5   | 0.075              | -7.8  | 4.678              | -1.1  | 3.621         | 4.5   | 3.606         | 5.3   | 3.843         | 11.5  | 28.93        | -1.7  |
| WS Down-Regulated: Antisense | 0.115            | 1.3   | 0.124             | -2.7  | 0.076              | -6.7  | 4.701              | -0.6  | 3.435         | -0.8  | 3.158         | -7.8  | 3.493         | 1.3   | 29.65        | 0.7   |
| BS Up-Regulated: Sense       | 0.092            | -12.1 | 0.142             | 8.0   | 0.076              | -12.9 | 4.718              | -0.4  | 3.493         | -0.4  | 3.249         | -4.9  | 3.438         | -0.2  | 28.93        | -1.8  |
| BS Down-Regulated: Sense     | 0.107            | 1.5   | 0.127             | -3.2  | 0.097              | 10.7  | 4.667              | -1.5  | 3.818         | 8.9   | 3.089         | -9.5  | 3.395         | -1.4  | 29.44        | 0.0   |
| WS Up-Regulated: Sense       | 0.100            | -5.2  | 0.137             | 4.1   | 0.085              | -2.6  | 4.658              | -1.7  | 3.407         | -2.8  | 3.509         | 2.8   | 3.538         | 2.7   | 28.67        | -2.6  |
| WS Down-Regulated: Sense     | 0.104            | -1.0  | 0.132             | 0.4   | 0.086              | -1.6  | 4.677              | -1.3  | 3.277         | -6.5  | 3.32333       | -2.7  | 3.605         | 4.6   | 29.27        | -0.6  |
