# Supplementary material for: Relationships between putative G-quadruplex-forming sequences, RecQ helicases, and transcription
Source: BMC Med Genet. 2015 Oct 8;16:91. doi: 10.1186/s12881-015-0236-4 (PMC4599794; doi:10.1186/s12881-015-0236-4)
Supplement: Additional file 15: — HepG2 epigenetic modeling of gene expression dataset. Expression modeling dataset used for epigenetic modeling of gene expression analysis. Each row corresponds to a TSS and contains information on positions of PQS within 2 kbp of the TSS as well as “bestbin” epigenomic track signals for DNase hypersensitivity and histone modifications. This file is an output of Additional file 11 and is taken as input by Additional file 19. (CSV 4911 kb) [file 12881_2015_236_MOESM15_ESM.csv]

unique.tss.number	seqnames.x	strand.x	gene_id.x	trbiotlist	gene_biotype	rpm1	rpm2	pooled.expression.out	start.y	end.y	width.y	gene_type	gene_status	gene_name	transcript_type	transcript_name	tss.out	chr.out	unique.gene.number	agg.exp.out	gene.num.out	strongest.tss	quad.num.up	delta.up	n.stacks.up	fa.up	fc.up	ft.up	length.up	l1.up	l2.up	l3.up	strand.up	quad.num.down	delta.down	n.stacks.down	fa.down	fc.down	ft.down	length.down	l1.down	l2.down	l3.down	strand.down	tss.gc	row.num	log.exp	DNAse	H3K79me2
83	chr1	+	ENSG00000239530.1	Mt_tRNA_pseudogene,	Mt_tRNA_pseudogene	0.0530366	0	83	568069	568136	68	Mt_tRNA_pseudogene	NOVEL	AC114498.1	Mt_tRNA_pseudogene	AC114498.1-201	568069	1	54	0.0265183	54	1	0	NA	NA	NA	NA	NA	NA	NA	NA	NA	NA	1	753	5	0.227272727	0.090909091	0.181818182	44	NA	NA	NA	-	0.436512697	54	-5.23686789773981	-5.98384026966664	4.71142928706475
86	chr1	+	ENSG00000240409.1	unprocessed_pseudogene,	pseudogene	0.0530366	0	86	568915	569121	207	pseudogene	KNOWN	RP5-857K21.14	unprocessed_pseudogene	RP5-857K21.14-001	568915	1	57	0.0265183	57	1	1	-93	5	0.227272727	0.090909091	0.181818182	44	NA	NA	NA	-	0	NA	NA	NA	NA	NA	NA	NA	NA	NA	NA	0.435712857	57	-5.23686789773981	-5.98384026966664	4.01688919893
87	chr1	+	ENSG00000248527.1	unprocessed_pseudogene,	pseudogene	0.0530366	0	87	569076	569756	681	pseudogene	KNOWN	RP5-857K21.10	unprocessed_pseudogene	RP5-857K21.10-001	569076	1	58	0.0265183	58	1	1	-254	5	0.227272727	0.090909091	0.181818182	44	NA	NA	NA	-	0	NA	NA	NA	NA	NA	NA	NA	NA	NA	NA	0.434513097	58	-5.23686789773981	-5.98384026966664	4.48568493671219
88	chr1	+	ENSG00000198744.5	unprocessed_pseudogene,	pseudogene	0.15911	0.049634	88	569756	570302	547	pseudogene	KNOWN	RP5-857K21.11	unprocessed_pseudogene	RP5-857K21.11-001	569756	1	59	0.104372	59	1	1	-934	5	0.227272727	0.090909091	0.181818182	44	NA	NA	NA	-	0	NA	NA	NA	NA	NA	NA	NA	NA	NA	NA	0.437912418	59	-3.26019336458042	-5.98384026966664	4.41997081326386
136	chr1	+	ENSG00000187634.6	processed_transcript,	protein_coding	0	0.049634	138	875726	877553	1828	protein_coding	KNOWN	SAMD11	processed_transcript	SAMD11-006	875726	1	90	0.024817	90	1	3	-1854|-409.5|-41.5	4|5|2	0.0833333333333333|0.162162162162162|0	0.166666666666667|0.189189189189189|0.0588235294117647	0.166666666666667|0.0540540540540541|0	24|37|17	NA|NA|NA	NA|NA|NA	NA|NA|NA	+|-|-	3	186.5|1527.5|1739	6|4|6	0.0810810810810811|0.137931034482759|0.0909090909090909	0.216216216216216|0.172413793103448|0.181818181818182	0.0540540540540541|0.0344827586206897|0.0681818181818182	37|29|44	NA|NA|NA	NA|NA|NA	NA|NA|NA	+|+|+	0.661467706	90	-5.33252746377914	-2.24536218921146	3.68127024470882
164	chr1	+	ENSG00000187608.5	protein_coding,	protein_coding	4.03078	5.60864	166	948803	949920	1118	protein_coding	KNOWN	ISG15	protein_coding	ISG15-001	948803	1	98	4.81971	98	1	2	-1840|-147.5	4|4	0.115384615384615|0	0.0769230769230769|0	0.0384615384615385|0.238095238095238	26|21	NA|NA	NA|NA	NA|NA	-|+	2	1609.5|1837.5	4|4	0.105263157894737|0.130434782608696	0.105263157894737|0.0434782608695652	0.105263157894737|0.130434782608696	19|23	2|NA	3|NA	1|NA	+|-	0.486702659	98	2.26894634268998	-3.41425284658292	5.99070097580273
244	chr1	-	ENSG00000160087.16	protein_coding,nonsense_mediated_decay,protein_coding,	protein_coding	5.72796	4.46706	246	1189294	1209234	19941	protein_coding	KNOWN	UBE2J2	protein_coding	UBE2J2-202	1209234	1	116	15.29253	116	1	6	-129|-298.5|-336.5|-535.5|-649|-1418	5|5|4|4|4|4	0.0357142857142857|0.111111111111111|0|0.103448275862069|0.0384615384615385|0	0.0714285714285714|0.148148148148148|0.157894736842105|0.206896551724138|0.153846153846154|0	0.0714285714285714|0.037037037037037|0.105263157894737|0.103448275862069|0.115384615384615|0.2	28|27|19|29|26|20	NA|NA|NA|NA|NA|NA	NA|NA|NA|NA|NA|NA	NA|NA|NA|NA|NA|NA	+|-|-|-|+|-	2	1451|319.5	4|4	0.136363636363636|0	0.136363636363636|0.36	0.0909090909090909|0	22|25	2|NA	3|NA	5|NA	-|+	0.537892422	116	3.93475520116141	-1.15424584580697	6.29131635153587
286	chr1	-	ENSG00000127054.12	retained_intron,	protein_coding	0.63644	0.545974	288	1248926	1250981	2056	protein_coding	KNOWN	CPSF3L	retained_intron	CPSF3L-019	1250981	1	122	0.591207	122	1	1	-161.5	30	0.154228856	0.109452736	0.024875622	201	NA	NA	NA	+	2	870|115.5	4|4	0.0833333333333333|0.0476190476190476	0.125|0.0952380952380952	0.166666666666667|0.142857142857143	24|21	3|NA	5|NA	1|NA	-|-	0.549090182	122	-0.758264743526607	-4.49651690534307	2.181608233303
289	chr1	-	ENSG00000240731.1	processed_transcript,	processed_transcript	0.106073	0	292	1252961	1254069	1109	processed_transcript	PUTATIVE	RP5-890O3.9	processed_transcript	RP5-890O3.9-001	1254069	1	123	0.0530365	123	1	2	-243|-1349	6|5	0.136363636363636|0.233333333333333	0.113636363636364|0.1	0.113636363636364|0	44|30	NA|NA	NA|NA	NA|NA	-|+	0	NA	NA	NA	NA	NA	NA	NA	NA	NA	NA	0.612677465	123	-4.23687061793002	-5.18962761285533	2.43146465342069
316	chr1	+	ENSG00000169962.4	protein_coding,	protein_coding	0.265183	0.148902	322	1266694	1270686	3993	protein_coding	KNOWN	TAS1R3	protein_coding	TAS1R3-001	1266694	1	126	0.2070425	126	1	1	-1878	4	0.076923077	0.269230769	0.115384615	26	7	5	2	+	2	244.5|654.5	4|7	0.08|0.0638297872340425	0.2|0.148936170212766	0.12|0.148936170212766	25|47	NA|NA	NA|NA	NA|NA	+|-	0.629674065	126	-2.27200115206261	-3.48679632865153	4.57352044259803
354	chr1	-	ENSG00000221978.6	protein_coding,	protein_coding	94.9886	113.314	360	1327668	1334697	7030	protein_coding	KNOWN	CCNL2	protein_coding	CCNL2-002	1334697	1	131	104.1513	131	1	0	NA	NA	NA	NA	NA	NA	NA	NA	NA	NA	2	458.5|398.5	6|7	0.0975609756097561|0.0408163265306122	0.219512195121951|0.163265306122449	0.0975609756097561|0.122448979591837	41|49	NA|NA	NA|NA	NA|NA	+|+	0.562087582	131	6.70253703675624	-1.58380454376027	7.59946961415232
357	chr1	+	ENSG00000224870.2	processed_transcript,processed_transcript,	lincRNA	10.3421	12.607	363	1334902	1336805	1904	lincRNA	NOVEL	RP4-758J18.2	processed_transcript	RP4-758J18.2-002	1334902	1	132	22.9491	132	1	2	-663.5|-603.5	6|7	0.0975609756097561|0.0408163265306122	0.219512195121951|0.163265306122449	0.0975609756097561|0.122448979591837	41|49	NA|NA	NA|NA	NA|NA	+|+	0	NA	NA	NA	NA	NA	NA	NA	NA	NA	NA	0.538892222	132	4.52036567114096	-1.62682065997867	7.12932431901761
375	chr1	+	ENSG00000205116.2	processed_transcript,	processed_transcript	0.0530366	0.099268	381	1361556	1363005	1450	processed_transcript	PUTATIVE	TMEM88B	processed_transcript	TMEM88B-001	1361556	1	139	0.0761523	139	1	1	-468.5	6	0.102564103	0.128205128	0.076923077	39	NA	NA	NA	+	15	243|344.5|482.5|548.5|838.5|923|1000.5|1074|1123.5|1195|1297|1373.5|1557|1760|1874	5|5|4|4|6|9|4|6|6|11|17|4|5|5|29	0.0882352941176471|0.142857142857143|0.16|0.0434782608695652|0.0857142857142857|0.161764705882353|0.16|0.157894736842105|0.128205128205128|0.25|0.151785714285714|0.04|0.0238095238095238|0.03125|0.272222222222222	0.147058823529412|0.114285714285714|0.04|0.0869565217391304|0.142857142857143|0.117647058823529|0.12|0.0789473684210526|0.0512820512820513|0.0526315789473684|0.0803571428571429|0.2|0.30952380952381|0.1875|0.00555555555555556	0.147058823529412|0.114285714285714|0.08|0.130434782608696|0.0571428571428571|0.0588235294117647|0.04|0.0789473684210526|0.179487179487179|0.0526315789473684|0.0803571428571429|0.08|0.0476190476190476|0.03125|0	34|35|25|23|35|68|25|38|39|76|112|25|42|32|180	NA|NA|NA|NA|NA|NA|NA|NA|NA|NA|NA|NA|NA|NA|NA	NA|NA|NA|NA|NA|NA|NA|NA|NA|NA|NA|NA|NA|NA|NA	NA|NA|NA|NA|NA|NA|NA|NA|NA|NA|NA|NA|NA|NA|NA	+|-|+|-|-|-|-|-|-|-|-|-|-|-|+	0.572485503	139	-3.71496857921469	-3.57173320743047	5.4155696503941
378	chr1	-	ENSG00000236239.1	processed_transcript,	processed_transcript	0	0.049634	384	1363502	1365635	2134	processed_transcript	PUTATIVE	RP4-758J18.9	processed_transcript	RP4-758J18.9-001	1365635	1	142	0.024817	142	1	6	-527|-586.5|-785|-1209|-1252|-1781	4|4|5|5|4|4	0.0454545454545455|0|0.0882352941176471|0.0714285714285714|0.153846153846154|0.115384615384615	0.227272727272727|0.304347826086957|0|0.214285714285714|0.0769230769230769|0.115384615384615	0.136363636363636|0|0.117647058823529|0.0714285714285714|0.0769230769230769|0.0769230769230769	22|23|34|28|26|26	5|NA|NA|NA|NA|NA	1|NA|NA|NA|NA|NA	3|NA|NA|NA|NA|NA	-|-|-|-|-|-	2	1985|545	5|4	0.0833333333333333|0.15625	0.222222222222222|0.1875	0.111111111111111|0.125	36|32	NA|NA	NA|NA	NA|NA	-|-	0.660067986	142	-5.33252746377914	-3.34665004399878	3.44169699971161
379	chr1	-	ENSG00000225285.1	processed_transcript,	processed_transcript	0.106073	0.049634	385	1365930	1367223	1294	processed_transcript	PUTATIVE	RP4-758J18.10	processed_transcript	RP4-758J18.10-003	1367223	1	143	0.0778535	143	1	4	-193|-558.5|-617.5|-985.5	4|5|4|4	0.115384615384615|0.0606060606060606|0.0952380952380952|0.0967741935483871	0.115384615384615|0.151515151515152|0.0476190476190476|0.258064516129032	0.0769230769230769|0.121212121212121|0.0952380952380952|0.0967741935483871	26|33|21|31	NA|NA|NA|NA	NA|NA|NA|NA	NA|NA|NA|NA	-|-|-|+	5	1061|1001.5|803|379|336	4|4|5|5|4	0.0454545454545455|0|0.0882352941176471|0.0714285714285714|0.153846153846154	0.227272727272727|0.304347826086957|0|0.214285714285714|0.0769230769230769	0.136363636363636|0|0.117647058823529|0.0714285714285714|0.0769230769230769	22|23|34|28|26	5|NA|NA|NA|NA	1|NA|NA|NA|NA	3|NA|NA|NA|NA	-|-|-|-|-	0.672865427	143	-3.68309429087966	-2.93897312191982	5.59865129575401
389	chr1	+	ENSG00000215915.5	processed_transcript,	protein_coding	4.45508	4.61596	395	1397863	1404043	6181	protein_coding	KNOWN	ATAD3C	processed_transcript	ATAD3C-004	1397863	1	145	4.53552	145	1	2	-1923.5|-266.5	4|6	0.103448275862069|0.189189189189189	0.137931034482759|0.135135135135135	0.103448275862069|0.0810810810810811	29|37	NA|NA	NA|NA	NA|NA	+|-	0	NA	NA	NA	NA	NA	NA	NA	NA	NA	NA	0.586482703	145	2.18126796606011	-3.37032538683053	3.2557436256094
553	chr1	+	ENSG00000067606.11	protein_coding,	protein_coding	14.479	9.23193	568	2066429	2082418	15990	protein_coding	KNOWN	PRKCZ	protein_coding	PRKCZ-011	2066429	1	179	11.855465	179	1	1	-853	4	0.0625	0.0625	0.125	16	1	2	1	+	1	1762.5	4	0.043478261	0.130434783	0.130434783	23	NA	NA	NA	-	0.573885223	178	3.56748034480451	-3.15584255303851	6.97456152423163
580	chr1	+	ENSG00000157933.9	processed_transcript,	protein_coding	0.0530366	0.099268	597	2179435	2234815	55381	protein_coding	KNOWN	SKI	processed_transcript	SKI-002	2179435	1	186	0.0761523	186	1	1	-692.5	4	0.142857143	0.142857143	0.095238095	21	2	3	3	+	0	NA	NA	NA	NA	NA	NA	NA	NA	NA	NA	0.530093981	185	-3.71496857921469	-3.96801771299978	4.51654521579688
643	chr1	-	ENSG00000238164.2	processed_transcript,	lincRNA	1.75021	2.13426	667	2481359	2488450	7092	lincRNA	NOVEL	RP3-395M20.8	processed_transcript	RP3-395M20.8-001	2488450	1	202	1.942235	202	1	1	-32.5	6	0.022222222	0.222222222	0.244444444	45	NA	NA	NA	+	3	1465.5|1078.5|975	5|6|4	0.102564102564103|0.162162162162162|0.125	0.179487179487179|0.189189189189189|0.166666666666667	0.0769230769230769|0.0810810810810811|0.125	39|37|24	NA|NA|NA	NA|NA|NA	NA|NA|NA	+|+|+	0.648670266	201	0.957717769667082	-2.98963833448647	6.20020627000664
649	chr1	+	ENSG00000157873.11	processed_transcript,	protein_coding	0.265183	0.694876	673	2493240	2494891	1652	protein_coding	KNOWN	TNFRSF14	processed_transcript	TNFRSF14-014	2493240	1	203	0.4800295	203	1	3	-1785|-1683|-749.5	5|4|6	0.205882352941176|0.0833333333333333|0.0810810810810811	0.117647058823529|0.125|0.216216216216216	0.0882352941176471|0.166666666666667|0.162162162162162	34|24|37	NA|7|NA	NA|1|NA	NA|3|NA	-|-|+	0	NA	NA	NA	NA	NA	NA	NA	NA	NA	NA	0.649470106	202	-1.05880502614536	-4.96123792239102	2.22766141324953
704	chr1	+	ENSG00000130762.10	protein_coding,protein_coding,	protein_coding	8.37979	7.2962	729	3388188	3397379	9192	protein_coding	KNOWN	ARHGEF16	protein_coding	ARHGEF16-201	3388188	1	220	15.67599	220	1	2	-191|-80.5	4|6	0.0909090909090909|0.0909090909090909	0.181818181818182|0.0606060606060606	0.0909090909090909|0.121212121212121	22|33	6|NA	1|NA	2|NA	+|+	1	1258.5	4	0.066666667	0.066666667	0.066666667	15	1	1	1	-	0.648670266	219	3.97048465261893	-1.77496697643731	5.5818455204305
727	chr1	+	ENSG00000078900.9	protein_coding,protein_coding,protein_coding,	protein_coding	0	0.198536	753	3569129	3650467	81339	protein_coding	KNOWN	TP73	protein_coding	TP73-201	3569129	1	227	0.297804	227	1	5	-1753.5|-585.5|-448.5|-82|-37	4|6|4|4|6	0.111111111111111|0.205128205128205|0.121212121212121|0.125|0.0625	0.222222222222222|0.0769230769230769|0.212121212121212|0.0833333333333333|0.1875	0.111111111111111|0.0512820512820513|0.0909090909090909|0.166666666666667|0.03125	27|39|33|24|32	NA|NA|NA|NA|NA	NA|NA|NA|NA|NA	NA|NA|NA|NA|NA	+|-|+|-|-	1	415	5	0.117647059	0.264705882	0.117647059	34	NA	NA	NA	+	0.557288542	226	-1.74756496305799	-3.24740890845874	4.02998358204344
740	chr1	+	ENSG00000235169.2	processed_transcript,	processed_transcript	17.6612	18.4142	766	3689352	3692546	3195	processed_transcript	NOVEL	RP1-286D6.2	processed_transcript	RP1-286D6.2-001	3689352	1	235	18.0377	235	1	4	-306|-234.5|-151.5|-50	5|11|4|10	0.0333333333333333|0.113924050632911|0.103448275862069|0.09375	0.166666666666667|0.189873417721519|0.172413793103448|0.25	0.0666666666666667|0.0253164556962025|0.103448275862069|0.03125	30|79|29|64	NA|NA|NA|NA	NA|NA|NA|NA	NA|NA|NA|NA	-|-|-|-	0	NA	NA	NA	NA	NA	NA	NA	NA	NA	NA	0.600879824	234	4.17294348613376	-1.90670485733279	6.07928441729055
744	chr1	-	ENSG00000130764.5	protein_coding,	protein_coding	23.0709	25.4126	770	3696784	3713068	16285	protein_coding	KNOWN	LRRC47	protein_coding	LRRC47-001	3713068	1	236	24.24175	236	1	1	-175.5	4	0.095238095	0	0.142857143	21	NA	NA	NA	+	1	663.5	5	0.034482759	0.206896552	0.068965517	29	NA	NA	NA	-	0.50209958	235	4.59942194490245	-1.56106419426723	6.15437275144131
754	chr1	-	ENSG00000116198.8	protein_coding,	protein_coding	20.207	22.236	781	3759673	3773778	14106	protein_coding	KNOWN	KIAA0562	protein_coding	KIAA0562-002	3773778	1	237	21.2215	237	1	2	-988.5|-1929.5	4|4	0|0.0476190476190476	0.0869565217391304|0.0476190476190476	0.173913043478261|0.238095238095238	23|21	NA|NA	NA|NA	NA|NA	+|+	1	383	7	0.038461538	0.25	0.019230769	52	NA	NA	NA	-	0.532293541	236	4.40745472880634	-0.317424885846577	5.49109654317491
757	chr1	+	ENSG00000169598.10	protein_coding,processed_transcript,	protein_coding	1.75021	1.83646	784	3774037	3801993	27957	protein_coding	KNOWN	DFFB	protein_coding	DFFB-004	3774037	1	238	3.58667	238	1	1	-642	7	0.038461538	0.25	0.019230769	52	NA	NA	NA	-	2	729.5|1670.5	4|4	0|0.0476190476190476	0.0869565217391304|0.0476190476190476	0.173913043478261|0.238095238095238	23|21	NA|NA	NA|NA	NA|NA	+|+	0.50869826	237	1.84264501285477	-1.01712210290955	6.321589130578
799	chr1	+	ENSG00000069424.8	protein_coding,protein_coding,protein_coding,	protein_coding	4.24293	3.27585	827	6086380	6160523	74144	protein_coding	KNOWN	KCNAB2	protein_coding	KCNAB2-001	6086380	1	254	11.27817	254	1	0	NA	NA	NA	NA	NA	NA	NA	NA	NA	NA	2	323|1705	5|4	0.0294117647058824|0.0555555555555556	0.176470588235294|0.0555555555555556	0.235294117647059|0.166666666666667	34|18	NA|NA	NA|NA	NA|NA	-|-	0.49390122	253	3.49546108938758	-2.36363478671306	3.9186159677725
823	chr1	+	ENSG00000158286.8	protein_coding,processed_transcript,	protein_coding	1.5911	2.6306	851	6266189	6281351	15163	protein_coding	KNOWN	RNF207	protein_coding	RNF207-201	6266189	1	259	4.2217	259	1	2	-1028|-673.5	4|4	0.0555555555555556|0.111111111111111	0|0.037037037037037	0.277777777777778|0.148148148148148	18|27	2|NA	3|NA	1|NA	-|+	6	333|443|626.5|1079|1200.5|1395	6|4|6|5|5|4	0.0833333333333333|0.125|0.0697674418604651|0.230769230769231|0.0967741935483871|0.05	0.277777777777778|0.3125|0.116279069767442|0.153846153846154|0.0967741935483871|0.15	0|0.09375|0.232558139534884|0.0384615384615385|0.0967741935483871|0.05	36|32|43|26|31|20	NA|6|NA|NA|NA|5	NA|5|NA|NA|NA|1	NA|7|NA|NA|NA|1	+|-|-|+|+|+	0.531493701	258	2.07782406236818	-1.76905435294458	5.67359055885618
837	chr1	-	ENSG00000116237.9	processed_transcript,processed_transcript,	protein_coding	21.9041	22.9309	865	6284659	6296032	11374	protein_coding	KNOWN	ICMT	processed_transcript	ICMT-006	6296032	1	262	44.835	262	1	2	-138.5|-200	6|4	0.037037037037037|0.0833333333333333	0.148148148148148|0.125	0|0.0833333333333333	27|24	NA|NA	NA|NA	NA|NA	-|+	1	282	4	0	0.25	0	28	NA	NA	NA	-	0.539492102	261	5.48655349262453	-0.956792727497849	5.2427857072498
845	chr1	-	ENSG00000097021.14	protein_coding,	protein_coding	4.72026	3.37511	873	6366175	6420766	54592	protein_coding	KNOWN	ACOT7	protein_coding	ACOT7-201	6420766	1	266	4.047685	266	1	1	-1782	4	0.166666667	0	0.166666667	24	7	1	2	-	3	1963|358.5|175	4|4|4	0.2|0.0952380952380952|0.125	0|0.0952380952380952|0.0833333333333333	0.1|0.0952380952380952|0.208333333333333	20|21|24	2|NA|NA	1|NA|NA	4|NA|NA	-|-|-	0.49690062	265	2.01709702061015	-4.38079168001849	5.56926043630752
861	chr1	+	ENSG00000187017.10	processed_transcript,	protein_coding	61.6816	83.6333	889	6508527	6520112	11586	protein_coding	KNOWN	ESPN	processed_transcript	ESPN-004	6508527	1	270	72.65745	270	1	2	-1798.5|-1576	4|4	0.0740740740740741|0.227272727272727	0.259259259259259|0.0909090909090909	0.148148148148148|0.0454545454545455	27|22	6|3	2|6	6|1	+|+	2	7.5|1890.5	4|7	0.12|0.191489361702128	0.16|0.170212765957447	0.08|0	25|47	4|NA	3|NA	4|NA	-|-	0.644871026	269	6.18303882842344	-3.13035284150459	5.39578974545725
890	chr1	-	ENSG00000162408.10	processed_transcript,	protein_coding	0.106073	0.099268	919	6592289	6593445	1157	protein_coding	KNOWN	NOL9	processed_transcript	NOL9-005	6593445	1	273	0.1026705	273	1	1	-1188.5	4	0.185185185	0.111111111	0.111111111	27	7	2	4	+	0	NA	NA	NA	NA	NA	NA	NA	NA	NA	NA	0.442311538	272	-3.28390637883366	-5.49323148940985	2.68571774518829
895	chr1	-	ENSG00000162408.10	processed_transcript,	protein_coding	10.183	9.87717	924	6609422	6614560	5139	protein_coding	KNOWN	NOL9	processed_transcript	NOL9-002	6614560	1	277	10.030085	277	1	0	NA	NA	NA	NA	NA	NA	NA	NA	NA	NA	1	256	5	0.071428571	0.142857143	0.142857143	28	NA	NA	NA	+	0.517896421	276	3.32626192701481	-1.13827965323016	6.91312885203879
902	chr1	+	ENSG00000204859.6	protein_coding,	protein_coding	6.41743	6.50206	931	6640077	6642305	2229	protein_coding	KNOWN	ZBTB48	protein_coding	ZBTB48-005	6640077	1	279	6.459745	279	1	1	-1497.5	4	0.12	0.08	0.12	25	NA	NA	NA	-	2	137.5|448	7|4	0.121951219512195|0.0909090909090909	0.0975609756097561|0.0909090909090909	0.0731707317073171|0.181818181818182	41|22	NA|3	NA|3	NA|3	+|-	0.557088582	278	2.69147721530673	-1.51374489725749	6.05089360659376
933	chr1	-	ENSG00000007923.11	processed_transcript,	protein_coding	55.1051	53.9025	962	6730521	6761879	31359	protein_coding	KNOWN	DNAJC11	processed_transcript	DNAJC11-007	6761879	1	284	54.5038	284	1	0	NA	NA	NA	NA	NA	NA	NA	NA	NA	NA	1	263.5	4	0.047619048	0.095238095	0.142857143	21	1	3	4	+	0.49170166	283	5.76828491285106	-1.21289856548133	7.65920253470644
995	chr1	-	ENSG00000225820.1	processed_transcript,	processed_transcript	0.15911	0	1024	8066074	8066784	711	processed_transcript	PUTATIVE	CTA-215D11.3	processed_transcript	CTA-215D11.3-001	8066784	1	307	0.079555	307	1	1	-1279	4	0.214285714	0.071428571	0.178571429	28	5	4	4	+	0	NA	NA	NA	NA	NA	NA	NA	NA	NA	NA	0.451709658	306	-3.65190358356136	-5.6437840135473	2.99877463988009
1037	chr1	-	ENSG00000142599.13	protein_coding,	protein_coding	6.09921	6.50206	1066	8414686	8877702	463017	protein_coding	KNOWN	RERE	protein_coding	RERE-014	8877702	1	331	6.300635	331	1	1	-71	5	0.0625	0.25	0.03125	32	NA	NA	NA	-	2	638|373.5	4|4	0.136363636363636|0.103448275862069	0.136363636363636|0.241379310344828	0.0454545454545455|0	22|29	4|NA	3|NA	2|NA	-|+	0.427514497	330	2.65549723578477	-1.31652455844273	6.9114136773704
1040	chr1	-	ENSG00000074800.8	processed_transcript,	protein_coding	131.425	88.4975	1069	8931150	8934976	3827	protein_coding	KNOWN	ENO1	processed_transcript	ENO1-007	8934976	1	333	109.96125	333	1	0	NA	NA	NA	NA	NA	NA	NA	NA	NA	NA	1	1180	4	0.2	0.05	0.05	20	2	2	2	+	0.526894621	332	6.78085140187056	-5.21619635402589	4.52972153738725
1041	chr1	-	ENSG00000236269.1	processed_transcript,	processed_transcript	0.95466	1.09195	1070	8935847	8938066	2220	processed_transcript	PUTATIVE	RP3-477M7.2	processed_transcript	RP3-477M7.2-001	8938066	1	334	1.023305	334	1	0	NA	NA	NA	NA	NA	NA	NA	NA	NA	NA	0	NA	NA	NA	NA	NA	NA	NA	NA	NA	NA	0.530093981	333	0.0332362099960766	-4.06127606336714	5.47930842691071
1045	chr1	-	ENSG00000074800.8	processed_transcript,	protein_coding	4045.48	3442.02	1074	8930231	8938747	8517	protein_coding	KNOWN	ENO1	processed_transcript	ENO1-005	8938747	1	335	3743.75	335	1	0	NA	NA	NA	NA	NA	NA	NA	NA	NA	NA	0	NA	NA	NA	NA	NA	NA	NA	NA	NA	NA	0.5084983	334	11.8702683825635	-2.48842260058974	7.42234744811776
1080	chr1	-	ENSG00000207865.1	miRNA,	miRNA	0.0530366	0	1109	9211727	9211836	110	miRNA	KNOWN	MIR34A	miRNA	MIR34A-201	9211836	1	348	0.0265183	348	1	0	NA	NA	NA	NA	NA	NA	NA	NA	NA	NA	0	NA	NA	NA	NA	NA	NA	NA	NA	NA	NA	0.515296941	347	-5.23686789773981	-5.55972383410925	2.74597044233159
1083	chr1	+	ENSG00000049239.7	protein_coding,	protein_coding	6.09921	10.8202	1112	9294863	9331396	36534	protein_coding	KNOWN	H6PD	protein_coding	H6PD-001	9294863	1	351	8.459705	351	1	3	-1290.5|-197|-84	5|4|4	0.162162162162162|0.166666666666667|0	0.135135135135135|0.125|0.136363636363636	0.135135135135135|0|0	37|24|22	NA|5|NA	NA|2|NA	NA|1|NA	-|+|-	2	183.5|285	4|4	0.111111111111111|0	0.259259259259259|0.25	0.037037037037037|0	27|32	NA|NA	NA|NA	NA|NA	+|-	0.529094181	350	3.08060735572614	-1.89163752971774	5.77708319626998
1096	chr1	+	ENSG00000188807.8	protein_coding,protein_coding,	protein_coding	0.63644	0.99268	1125	9648980	9665012	16033	protein_coding	KNOWN	TMEM201	protein_coding	TMEM201-003	9648980	1	359	1.62912	359	1	2	-244|-55	5|8	0.1|0.112903225806452	0.166666666666667|0.161290322580645	0.0666666666666667|0.0645161290322581	30|62	NA|NA	NA|NA	NA|NA	-|-	3	181.5|332.5|1252.5	6|4|4	0.0232558139534884|0.111111111111111|0.0740740740740741	0.255813953488372|0.222222222222222|0.185185185185185	0.0232558139534884|0.0740740740740741|0.222222222222222	43|27|27	NA|NA|6	NA|NA|6	NA|NA|2	-|+|-	0.49030194	358	0.704092875827008	-2.41118780053396	3.84923950707449
1116	chr1	-	ENSG00000178585.10	protein_coding,	protein_coding	0.530366	0.397072	1148	9909597	9932150	22554	protein_coding	KNOWN	CTNNBIP1	protein_coding	CTNNBIP1-201	9932150	1	368	0.463719	368	1	0	NA	NA	NA	NA	NA	NA	NA	NA	NA	NA	3	1257|650|171.5	4|4|6	0.05|0.0555555555555556|0.0975609756097561	0.05|0|0.317073170731707	0.2|0.166666666666667|0.0975609756097561	20|18|41	4|NA|NA	1|NA|NA	2|NA|NA	+|-|-	0.521095781	367	-1.10867725529114	-4.29050459270462	2.30278219519326
1124	chr1	-	ENSG00000162441.6	processed_transcript,	protein_coding	2.38665	1.24085	1156	9982171	10002807	20637	protein_coding	KNOWN	LZIC	processed_transcript	LZIC-003	10002807	1	371	1.81375	371	1	0	NA	NA	NA	NA	NA	NA	NA	NA	NA	NA	0	NA	NA	NA	NA	NA	NA	NA	NA	NA	NA	0.480903819	370	0.85897561429202	-4.21354413484409	5.3050661139831
1140	chr1	+	ENSG00000130939.13	protein_coding,	protein_coding	35.9058	32.7088	1172	10093016	10241289	148274	protein_coding	KNOWN	UBE4B	protein_coding	UBE4B-201	10093016	1	380	34.3073	380	1	0	NA	NA	NA	NA	NA	NA	NA	NA	NA	NA	1	127.5	4	0.16	0	0.08	25	NA	NA	NA	-	0.50109978	379	5.10044368449944	-1.84217499496829	6.68802377494403
1152	chr1	+	ENSG00000130939.13	processed_transcript,	protein_coding	0.0530366	0.049634	1184	10231014	10240074	9061	protein_coding	KNOWN	UBE4B	processed_transcript	UBE4B-004	10231014	1	385	0.0513353	385	1	0	NA	NA	NA	NA	NA	NA	NA	NA	NA	NA	0	NA	NA	NA	NA	NA	NA	NA	NA	NA	NA	0.456308738	384	-4.28390497366436	-5.15323468797774	4.73437407376553
1179	chr1	+	ENSG00000251503.2	protein_coding,	protein_coding	1.16681	1.14158	1212	10490441	10511716	21276	protein_coding	NOVEL	APITD1-CORT	protein_coding	APITD1-CORT-002	10490441	1	391	1.154195	391	1	1	-1177.5	4	0.130434783	0.173913043	0.086956522	23	NA	NA	NA	-	2	206.5|1092	4|4	0|0.181818181818182	0.142857142857143|0.0909090909090909	0.142857142857143|0.0909090909090909	21|22	2|2	2|1	2|6	+|-	0.526894621	390	0.206886986346318	-2.22296283509137	4.73604241146419
1180	chr1	+	ENSG00000175279.12	protein_coding,	protein_coding	2.38665	2.1839	1213	10490500	10502766	12267	protein_coding	KNOWN	APITD1	protein_coding	APITD1-001	10490500	1	392	2.285275	392	1	1	-1236.5	4	0.130434783	0.173913043	0.086956522	23	NA	NA	NA	-	2	147.5|1033	4|4	0|0.181818181818182	0.142857142857143|0.0909090909090909	0.142857142857143|0.0909090909090909	21|22	2|2	2|1	2|6	+|-	0.531893621	391	1.19236778334209	-2.19362805063196	4.2379008037804
1191	chr1	-	ENSG00000160049.6	protein_coding,	protein_coding	42.4824	40.6503	1224	10516579	10532583	16005	protein_coding	KNOWN	DFFA	protein_coding	DFFA-001	10532583	1	399	41.56635	399	1	0	NA	NA	NA	NA	NA	NA	NA	NA	NA	NA	1	226	7	0.083333333	0.229166667	0.104166667	48	NA	NA	NA	-	0.48790242	398	5.37734416331891	-2.54371111807485	5.7442689627477
1193	chr1	+	ENSG00000142655.7	protein_coding,	protein_coding	40.3078	34.4956	1226	10535008	10690372	155365	protein_coding	KNOWN	PEX14	protein_coding	PEX14-201	10535008	1	400	37.4017	400	1	0	NA	NA	NA	NA	NA	NA	NA	NA	NA	NA	2	203.5|346	9|4	0.111111111111111|0.125	0.158730158730159|0.166666666666667	0.0634920634920635|0.125	63|24	NA|1	NA|4	NA|6	-|+	0.480903819	399	5.22503194055724	-2.05049641494844	5.3318344297711
1214	chr1	+	ENSG00000120948.10	processed_transcript,	protein_coding	97.3222	108.004	1250	11072712	11078930	6219	protein_coding	KNOWN	TARDBP	processed_transcript	TARDBP-005	11072712	1	407	102.6631	407	1	2	-1323|-366	7|8	0.305555555555556|0.0416666666666667	0|0.229166666666667	0|0.0625	36|48	NA|NA	NA|NA	NA|NA	+|-	0	NA	NA	NA	NA	NA	NA	NA	NA	NA	NA	0.49990002	406	6.68177391950269	-1.74757946933644	8.08675195549653
1224	chr1	-	ENSG00000009724.12	protein_coding,	protein_coding	9.1223	10.0757	1260	11104855	11107290	2436	protein_coding	KNOWN	MASP2	protein_coding	MASP2-002	11107290	1	408	9.599	408	1	0	NA	NA	NA	NA	NA	NA	NA	NA	NA	NA	3	417.5|371.5|98.5	4|5|4	0.185185185185185|0.0645161290322581|0.130434782608696	0.185185185185185|0.129032258064516|0.130434782608696	0.111111111111111|0.193548387096774|0.0434782608695652	27|31|23	4|NA|NA	6|NA|NA	4|NA|NA	-|-|+	0.49590082	407	3.2628841172727	-2.22768530419314	5.99715709884396
1242	chr1	-	ENSG00000171824.9	protein_coding,	protein_coding	35.5876	40.4517	1278	11126678	11159894	33217	protein_coding	KNOWN	EXOSC10	protein_coding	EXOSC10-201	11159894	1	413	38.01965	413	1	0	NA	NA	NA	NA	NA	NA	NA	NA	NA	NA	0	NA	NA	NA	NA	NA	NA	NA	NA	NA	NA	0.483303339	412	5.24867334582205	-0.995100236315548	7.34870349752572
1273	chr1	-	ENSG00000116661.8	processed_transcript,	protein_coding	0.47733	0.74451	1309	11709585	11710770	1186	protein_coding	KNOWN	FBXO2	processed_transcript	FBXO2-004	11710770	1	428	0.61092	428	1	1	-1511	5	0.176470588	0.176470588	0.117647059	34	NA	NA	NA	+	5	1724|1648|1452|959|457	6|4|4|5|4	0|0.115384615384615|0.0416666666666667|0.0833333333333333|0.1	0.142857142857143|0.153846153846154|0.0416666666666667|0.138888888888889|0.1	0.178571428571429|0.0384615384615385|0.0833333333333333|0.138888888888889|0.05	28|26|24|36|20	NA|NA|NA|NA|2	NA|NA|NA|NA|1	NA|NA|NA|NA|2	-|-|+|-|-	0.608478304	427	-0.710944623451836	-4.84472744412453	2.32435210385495
1301	chr1	+	ENSG00000177674.10	processed_transcript,	protein_coding	28.1625	29.0855	1338	11796199	11810545	14347	protein_coding	KNOWN	AGTRAP	processed_transcript	AGTRAP-007	11796199	1	437	28.624	437	1	1	-19.5	5	0	0.217391304	0	23	NA	NA	NA	+	2	197.5|773.5	4|4	0.310344827586207|0	0|0.19047619047619	0.0689655172413793|0.0476190476190476	29|21	5|NA	6|NA	5|NA	+|-	0.4965007	436	4.83915338738982	-1.80288447865088	5.7252287393564
1328	chr1	+	ENSG00000011021.16	protein_coding,protein_coding,protein_coding,protein_coding,protein_coding,protein_coding,	protein_coding	21.7981	30.1775	1368	11866320	11888275	21956	protein_coding	KNOWN	CLCN6	protein_coding	CLCN6-002	11866320	1	442	155.9268	442	1	0	NA	NA	NA	NA	NA	NA	NA	NA	NA	NA	1	163.5	4	0.08	0.2	0.12	25	NA	NA	NA	+	0.543891222	441	7.28472510308424	-1.20090936544997	6.11982111446613
1342	chr1	-	ENSG00000116685.11	protein_coding,	protein_coding	87.2453	81.3998	1382	11982232	11986485	4254	protein_coding	KNOWN	KIAA2013	protein_coding	KIAA2013-001	11986485	1	452	84.32255	452	1	0	NA	NA	NA	NA	NA	NA	NA	NA	NA	NA	1	132.5	5	0	0.258064516	0.064516129	31	NA	NA	NA	-	0.4905019	451	6.39784659109313	-2.12909640180416	5.73696220046108
1359	chr1	+	ENSG00000116688.9	processed_transcript,	protein_coding	20.5252	24.6681	1399	12040492	12052697	12206	protein_coding	KNOWN	MFN2	processed_transcript	MFN2-006	12040492	1	454	22.59665	454	1	1	-301	3	0.136363636	0.136363636	0	22	NA	NA	NA	-	2	139.5|232.5	5|4	0.0857142857142857|0.0869565217391304	0.228571428571429|0.260869565217391	0.142857142857143|0.0434782608695652	35|23	NA|1	NA|4	NA|4	+|+	0.513897221	453	4.49803700086311	-1.05889071169475	7.29505082784912
1383	chr1	+	ENSG00000048707.8	protein_coding,protein_coding,	protein_coding	1.0077	1.24085	1423	12290124	12572099	281976	protein_coding	KNOWN	VPS13D	protein_coding	VPS13D-003	12290124	1	466	2.24855	466	1	0	NA	NA	NA	NA	NA	NA	NA	NA	NA	NA	3	32|91.5|849	4|5|4	0|0.137931034482759|0.05	0.272727272727273|0.206896551724138|0.05	0.0454545454545455|0.0689655172413793|0.15	22|29|20	NA|NA|1	NA|NA|1	NA|NA|4	+|+|+	0.487302539	465	1.16899496492755	-1.90238373138998	6.00880974655643
1405	chr1	-	ENSG00000162496.4	protein_coding,	protein_coding	11.8802	14.9895	1446	12627939	12677737	49799	protein_coding	KNOWN	DHRS3	protein_coding	DHRS3-001	12677737	1	473	13.43485	473	1	0	NA	NA	NA	NA	NA	NA	NA	NA	NA	NA	3	1237|904|613.5	6|3|4	0.136363636363636|0.125|0.0740740740740741	0.113636363636364|0.0416666666666667|0.148148148148148	0.113636363636364|0|0.037037037037037	44|24|27	NA|NA|NA	NA|NA|NA	NA|NA|NA	+|+|-	0.557488502	472	3.747908308649	-4.51618991001522	6.77137335244575
1509	chr1	-	ENSG00000175147.7	processed_transcript,	lincRNA	2.86398	1.98536	1555	15442449	15478960	36512	lincRNA	KNOWN	C1orf126	processed_transcript	C1orf126-001	15478960	1	540	2.42467	540	1	3	-985|-1176|-1251.5	4|4|5	0.178571428571429|0.125|0.172413793103448	0.142857142857143|0.125|0.137931034482759	0.0714285714285714|0|0	28|16|29	NA|2|NA	NA|1|NA	NA|1|NA	+|+|-	0	NA	NA	NA	NA	NA	NA	NA	NA	NA	NA	0.605678864	539	1.2777884084296	-2.45877465556343	5.1574159791448
1569	chr1	-	ENSG00000237301.1	processed_transcript,	lincRNA	0.106073	0.099268	1622	15912631	15930121	17491	lincRNA	NOVEL	RP4-680D5.2	processed_transcript	RP4-680D5.2-001	15930121	1	558	0.1026705	558	1	0	NA	NA	NA	NA	NA	NA	NA	NA	NA	NA	0	NA	NA	NA	NA	NA	NA	NA	NA	NA	NA	0.469706059	557	-3.28390637883366	-2.50634446399891	6.0049599187553
1570	chr1	+	ENSG00000235084.2	retrotransposed,	pseudogene	9.81178	5.41011	1623	15931077	15931538	462	pseudogene	KNOWN	RP4-680D5.3	retrotransposed	RP4-680D5.3-201	15931077	1	559	7.610945	559	1	0	NA	NA	NA	NA	NA	NA	NA	NA	NA	NA	0	NA	NA	NA	NA	NA	NA	NA	NA	NA	NA	0.49030194	558	2.92807559461861	-5.17391810033832	2.85160074992642
1574	chr1	+	ENSG00000197312.6	protein_coding,	protein_coding	1.69717	1.29048	1627	15943995	15995539	51545	protein_coding	KNOWN	DDI2	protein_coding	DDI2-001	15943995	1	562	1.493825	562	1	1	-1788	4	0.25	0.041666667	0.083333333	24	NA	NA	NA	-	0	NA	NA	NA	NA	NA	NA	NA	NA	NA	NA	0.484303139	561	0.579011147846046	-1.94174725956821	7.66688729140513
1579	chr1	+	ENSG00000116786.7	protein_coding,	protein_coding	6.73565	7.69327	1632	16010827	16061264	50438	protein_coding	KNOWN	PLEKHM2	protein_coding	PLEKHM2-001	16010827	1	564	7.21446	564	1	11	-1114.5|-875|-826.5|-733|-641.5|-531.5|-442.5|-376.5|-275|-192.5|-140.5	6|5|4|11|4|4|5|4|4|4|6	0.114285714285714|0.0625|0.037037037037037|0.0795454545454545|0.037037037037037|0.12|0.0930232558139535|0.037037037037037|0.125|0.032258064516129|0.0285714285714286	0.2|0.21875|0.185185185185185|0.136363636363636|0.185185185185185|0.16|0.162790697674419|0.222222222222222|0.0833333333333333|0.161290322580645|0.171428571428571	0.0857142857142857|0.09375|0.185185185185185|0.238636363636364|0.148148148148148|0.12|0.255813953488372|0.148148148148148|0.125|0.225806451612903|0.171428571428571	35|32|27|88|27|25|43|27|24|31|35	NA|NA|NA|NA|NA|NA|NA|NA|NA|NA|NA	NA|NA|NA|NA|NA|NA|NA|NA|NA|NA|NA	NA|NA|NA|NA|NA|NA|NA|NA|NA|NA|NA	+|+|+|+|+|+|+|+|+|+|+	3	79|381|537.5	4|4|4	0|0.115384615384615|0.105263157894737	0.318181818181818|0.115384615384615|0.263157894736842	0|0.0384615384615385|0	22|26|19	2|NA|1	4|NA|2	4|NA|4	+|-|-	0.535292941	563	2.85089141349993	-2.23581690364727	4.81009384482161
1607	chr1	-	ENSG00000233954.4	processed_pseudogene,	pseudogene	0.31822	0.099268	1660	16133869	16134144	276	pseudogene	KNOWN	RP11-169K16.7	processed_pseudogene	RP11-169K16.7-001	16134144	1	572	0.208744	572	1	0	NA	NA	NA	NA	NA	NA	NA	NA	NA	NA	0	NA	NA	NA	NA	NA	NA	NA	NA	NA	NA	0.475304939	571	-2.26019336458042	-4.80385627992528	3.22428852416944
1609	chr1	+	ENSG00000178715.7	processed_pseudogene,	pseudogene	6.73565	6.9984	1662	16154724	16155167	444	pseudogene	KNOWN	RP11-169K16.8	processed_pseudogene	RP11-169K16.8-201	16154724	1	573	6.867025	573	1	0	NA	NA	NA	NA	NA	NA	NA	NA	NA	NA	0	NA	NA	NA	NA	NA	NA	NA	NA	NA	NA	0.479504099	572	2.77968521588072	-5.21619635402589	3.53903568365305
1612	chr1	+	ENSG00000065526.5	protein_coding,	protein_coding	1.53806	1.29048	1665	16174359	16266955	92597	protein_coding	KNOWN	SPEN	protein_coding	SPEN-001	16174359	1	575	1.41427	575	1	1	-83	8	0.145833333	0.166666667	0	48	NA	NA	NA	-	1	1050.5	6	0.133333333	0.177777778	0.155555556	45	NA	NA	NA	-	0.476704659	574	0.500057573100688	-2.85934172064703	6.99695819278088
1635	chr1	-	ENSG00000116809.6	protein_coding,protein_coding,protein_coding,	protein_coding	5.67492	7.24657	1689	16268366	16302627	34262	protein_coding	KNOWN	ZBTB17	protein_coding	ZBTB17-201	16302627	1	582	19.382235	582	1	1	-1835	5	0.235294118	0.058823529	0.088235294	34	NA	NA	NA	-	3	562|323.5|184	5|6|4	0.0714285714285714|0.0465116279069767|0.107142857142857	0.214285714285714|0.162790697674419|0.25	0.0357142857142857|0.116279069767442|0.0357142857142857	28|43|28	NA|NA|NA	NA|NA|NA	NA|NA|NA	-|-|-	0.433913217	581	4.27666303496452	-2.5820713826935	5.35497423113771
1638	chr1	+	ENSG00000183888.4	protein_coding,	protein_coding	19.2523	14.9895	1692	16330731	16335302	4572	protein_coding	KNOWN	C1orf64	protein_coding	C1orf64-001	16330731	1	585	17.1209	585	1	0	NA	NA	NA	NA	NA	NA	NA	NA	NA	NA	0	NA	NA	NA	NA	NA	NA	NA	NA	NA	NA	0.477304539	584	4.0976866372461	-2.43908166548708	5.06880870764382
1662	chr1	-	ENSG00000142627.8	processed_transcript,	protein_coding	0.0530366	0.099268	1717	16461055	16472945	11891	protein_coding	KNOWN	EPHA2	processed_transcript	EPHA2-003	16472945	1	594	0.0761523	594	1	0	NA	NA	NA	NA	NA	NA	NA	NA	NA	NA	2	1163|867	5|4	0.166666666666667|0.136363636363636	0.2|0.136363636363636	0|0.0454545454545455	30|22	NA|1	NA|7	NA|1	+|+	0.552289542	593	-3.71496857921469	-1.85255785916045	5.34736830277477
1663	chr1	+	ENSG00000227959.1	processed_transcript,	processed_transcript	0.95466	1.19122	1718	16481706	16483824	2119	processed_transcript	NOVEL	RP11-276H7.2	processed_transcript	RP11-276H7.2-001	16481706	1	595	1.07294	595	1	3	-1711.5|-1070.5|-157.5	5|3|4	0.0689655172413793|0.0869565217391304|0.130434782608696	0.172413793103448|0.0434782608695652|0.130434782608696	0.0689655172413793|0.130434782608696|0.0869565217391304	29|23|23	NA|NA|NA	NA|NA|NA	NA|NA|NA	-|-|+	3	187|596|760.5	5|5|4	0.0416666666666667|0.0833333333333333|0.037037037037037	0.166666666666667|0.25|0.185185185185185	0.0416666666666667|0.0833333333333333|0.111111111111111	24|36|27	NA|NA|5	NA|NA|4	NA|NA|3	-|+|-	0.592481504	594	0.101569401236353	-3.44220662213239	6.81138894325882
1666	chr1	-	ENSG00000142627.8	protein_coding,	protein_coding	24.0256	19.6551	1721	16450832	16482582	31751	protein_coding	KNOWN	EPHA2	protein_coding	EPHA2-001	16482582	1	596	21.84035	596	1	0	NA	NA	NA	NA	NA	NA	NA	NA	NA	NA	5	1946.5|1033.5|689|280|115.5	3|4|5|5|4	0.0869565217391304|0.130434782608696|0.0416666666666667|0.0833333333333333|0.037037037037037	0.0434782608695652|0.130434782608696|0.166666666666667|0.25|0.185185185185185	0.130434782608696|0.0869565217391304|0.0416666666666667|0.0833333333333333|0.111111111111111	23|23|24|36|27	NA|NA|NA|NA|5	NA|NA|NA|NA|4	NA|NA|NA|NA|3	-|+|-|+|-	0.516696661	595	4.44892407107271	-2.36066777433706	7.06826674504535
1694	chr1	-	ENSG00000226457.1	processed_pseudogene,	pseudogene	0.0530366	0	1750	16695645	16696025	381	pseudogene	KNOWN	RP11-430L17.1	processed_pseudogene	RP11-430L17.1-001	16696025	1	606	0.0265183	606	1	1	-1880	8	0.24	0.04	0.02	50	NA	NA	NA	-	1	1974	4	0	0.25	0.083333333	24	NA	NA	NA	-	0.467706459	605	-5.23686789773981	-5.76407197124197	2.7524077941884
1701	chr1	+	ENSG00000157191.13	protein_coding,protein_coding,	protein_coding	15.911	24.1221	1758	16767219	16786572	19354	protein_coding	KNOWN	NECAP2	protein_coding	NECAP2-002	16767219	1	608	40.0331	608	1	0	NA	NA	NA	NA	NA	NA	NA	NA	NA	NA	1	601	4	0.142857143	0.142857143	0.178571429	28	NA	NA	NA	-	0.472105579	607	5.3231214313588	-1.81450891828445	6.94647832939901
1728	chr1	-	ENSG00000219481.3	processed_transcript,	lincRNA	6.62958	11.7633	1786	16931913	16940029	8117	lincRNA	NOVEL	RP5-1182A14.1	processed_transcript	RP5-1182A14.1-002	16940029	1	620	9.19644	620	1	0	NA	NA	NA	NA	NA	NA	NA	NA	NA	NA	1	309.5	4	0	0.08	0.12	25	NA	NA	NA	-	0.445310938	619	3.2010754928756	-1.40735972319131	6.64070201193184
1733	chr1	-	ENSG00000215908.4	processed_transcript,	lincRNA	9.17534	10.6217	1791	16947340	16971167	23828	lincRNA	NOVEL	CROCCP2	processed_transcript	CROCCP2-001	16971167	1	622	9.89852	622	1	0	NA	NA	NA	NA	NA	NA	NA	NA	NA	NA	0	NA	NA	NA	NA	NA	NA	NA	NA	NA	NA	0.617876425	621	3.30721283344716	-1.05828970618719	8.8092408136704
1757	chr1	+	ENSG00000239505.1	tRNA_pseudogene,	tRNA_pseudogene	0.0530366	0	1816	17186693	17186765	73	tRNA_pseudogene	NOVEL	BX284668.2	tRNA_pseudogene	BX284668.2-201	17186693	1	637	0.0265183	637	1	0	NA	NA	NA	NA	NA	NA	NA	NA	NA	NA	0	NA	NA	NA	NA	NA	NA	NA	NA	NA	NA	0.469106179	636	-5.23686789773981	-5.44844555524634	5.47785885404565
1802	chr1	-	ENSG00000159363.13	protein_coding,	protein_coding	5.67492	4.6656	1863	17312453	17338423	25971	protein_coding	KNOWN	ATP13A2	protein_coding	ATP13A2-005	17338423	1	650	5.17026	650	1	1	-39.5	4	0.086956522	0.260869565	0	23	7	2	1	-	5	1826.5|503.5|442.5|76.5|41	5|4|4|4|4	0.189189189189189|0.037037037037037|0.142857142857143|0.0689655172413793|0.0769230769230769	0.0810810810810811|0.222222222222222|0.0476190476190476|0.206896551724138|0.269230769230769	0|0.111111111111111|0.0476190476190476|0.0689655172413793|0.0769230769230769	37|27|21|29|26	NA|NA|NA|NA|NA	NA|NA|NA|NA|NA	NA|NA|NA|NA|NA	-|-|+|+|+	0.50989802	649	2.37023683204486	-1.29052934269761	5.20717476610859
1836	chr1	+	ENSG00000074964.11	protein_coding,	protein_coding	0.79555	0.297804	1898	17907048	18024144	117097	protein_coding	KNOWN	ARHGEF10L	protein_coding	ARHGEF10L-003	17907048	1	663	0.546677	663	1	1	-1563.5	5	0.181818182	0.121212121	0.121212121	33	NA	NA	NA	+	0	NA	NA	NA	NA	NA	NA	NA	NA	NA	NA	0.529094181	661	-0.871239415680492	-3.09664084107327	6.81744428873092
1855	chr1	+	ENSG00000179023.6	protein_coding,	protein_coding	0.0530366	0.049634	1917	18807424	18812478	5055	protein_coding	KNOWN	KLHDC7A	protein_coding	KLHDC7A-001	18807424	1	670	0.0513353	670	1	0	NA	NA	NA	NA	NA	NA	NA	NA	NA	NA	3	517.5|1034.5|1218	4|4|5	0.217391304347826|0.103448275862069|0.0625	0.0434782608695652|0.275862068965517|0.21875	0.0869565217391304|0.137931034482759|0.09375	23|29|32	NA|NA|NA	NA|NA|NA	NA|NA|NA	-|+|-	0.5094981	668	-4.28390497366436	-1.34629424556703	4.11556664721657
1866	chr1	-	ENSG00000159423.11	protein_coding,protein_coding,	protein_coding	113.764	107.656	1929	19209077	19229034	19958	protein_coding	KNOWN	ALDH4A1	protein_coding	ALDH4A1-201	19229034	1	677	221.42	677	1	0	NA	NA	NA	NA	NA	NA	NA	NA	NA	NA	1	515.5	4	0.130434783	0.130434783	0.086956522	23	NA	NA	NA	+	0.50729854	675	7.79064173076342	-2.04393743641706	6.59023083586824
1889	chr1	-	ENSG00000127481.9	protein_coding,protein_coding,protein_coding,	protein_coding	12.9409	13.1034	1956	19401000	19536746	135747	protein_coding	KNOWN	UBR4	protein_coding	UBR4-201	19536746	1	679	39.06645	679	1	0	NA	NA	NA	NA	NA	NA	NA	NA	NA	NA	0	NA	NA	NA	NA	NA	NA	NA	NA	NA	NA	0.415916817	677	5.28785825749652	-1.28313725824035	6.73893545303634
1901	chr1	-	ENSG00000127463.8	retained_intron,protein_coding,	protein_coding	82.7902	74.9474	1971	19571283	19578021	6739	protein_coding	KNOWN	KIAA0090	protein_coding	KIAA0090-006	19578021	1	681	157.7376	681	1	1	-353	4	0.133333333	0.166666667	0.066666667	30	NA	NA	NA	+	0	NA	NA	NA	NA	NA	NA	NA	NA	NA	NA	0.532693461	679	7.3013827869214	-1.39213325907494	7.31074369187048
1902	chr1	+	ENSG00000053372.4	protein_coding,	protein_coding	2.65183	3.67292	1972	19578033	19586622	8590	protein_coding	KNOWN	MRTO4	protein_coding	MRTO4-001	19578033	1	682	3.162375	682	1	0	NA	NA	NA	NA	NA	NA	NA	NA	NA	NA	1	341	4	0.133333333	0.166666667	0.066666667	30	NA	NA	NA	+	0.435912817	680	1.66100845516057	-1.58250765655687	6.6902663150632
1903	chr1	-	ENSG00000127463.8	protein_coding,	protein_coding	82.7372	74.6496	1973	19542158	19578046	35889	protein_coding	KNOWN	KIAA0090	protein_coding	KIAA0090-003	19578046	1	683	78.6934	683	1	1	-328	4	0.133333333	0.166666667	0.066666667	30	NA	NA	NA	+	0	NA	NA	NA	NA	NA	NA	NA	NA	NA	NA	0.531893621	681	6.29817073714422	-1.4104244433295	7.29932166654536
1904	chr1	+	ENSG00000053372.4	processed_transcript,	protein_coding	36.0119	32.3614	1974	19578329	19582546	4218	protein_coding	KNOWN	MRTO4	processed_transcript	MRTO4-002	19578329	1	684	34.18665	684	1	0	NA	NA	NA	NA	NA	NA	NA	NA	NA	NA	1	45	4	0.133333333	0.166666667	0.066666667	30	NA	NA	NA	+	0.453509298	682	5.09536115278072	-2.06491147894572	6.90661172498693
1917	chr1	+	ENSG00000040487.8	protein_coding,	protein_coding	11.509	13.9968	1990	19638820	19655794	16975	protein_coding	KNOWN	PQLC2	protein_coding	PQLC2-001	19638820	1	690	12.7529	690	1	2	-621|-471	4|4	0.107142857142857|0	0.107142857142857|0.25	0.107142857142857|0.125	28|24	NA|NA	NA|NA	NA|NA	+|-	0	NA	NA	NA	NA	NA	NA	NA	NA	NA	NA	0.548490302	688	3.67275344706046	-1.04423787007912	6.99698082860055
1943	chr1	+	ENSG00000173436.9	processed_transcript,	protein_coding	32.7236	23.3776	2017	19923495	19953117	29623	protein_coding	KNOWN	C1orf151	processed_transcript	C1orf151-002	19923495	1	699	28.0506	699	1	0	NA	NA	NA	NA	NA	NA	NA	NA	NA	NA	0	NA	NA	NA	NA	NA	NA	NA	NA	NA	NA	0.442511498	697	4.80995972517835	-1.54161383954426	7.16587588854517
1968	chr1	-	ENSG00000178828.5	protein_coding,	protein_coding	0.106073	0.24817	2042	20140523	20141771	1249	protein_coding	KNOWN	RNF186	protein_coding	RNF186-001	20141771	1	705	0.1771215	705	1	3	-801|-849|-1338	6|4|4	0.15|0.307692307692308|0.115384615384615	0.225|0.115384615384615|0.115384615384615	0.1|0.0384615384615385|0.0769230769230769	40|26|26	NA|6|NA	NA|6|NA	NA|2|NA	-|+|-	2	1555.5|896	5|4	0.137931034482759|0.233333333333333	0.0344827586206897|0.2	0.137931034482759|0.0333333333333333	29|30	NA|5	NA|6	NA|5	-|+	0.471305739	703	-2.49718874976119	-4.02794559047196	3.67721596227773
1970	chr1	+	ENSG00000169914.5	processed_transcript,	protein_coding	0.31822	0.397072	2044	20216951	20224308	7358	protein_coding	KNOWN	OTUD3	processed_transcript	OTUD3-002	20216951	1	706	0.357646	706	1	0	NA	NA	NA	NA	NA	NA	NA	NA	NA	NA	0	NA	NA	NA	NA	NA	NA	NA	NA	NA	NA	0.397920416	704	-1.48339578872444	-5.68772512893801	2.19290560642655
1972	chr1	-	ENSG00000188784.4	protein_coding,	protein_coding	0	0.049634	2046	20246502	20250110	3609	protein_coding	KNOWN	PLA2G2E	protein_coding	PLA2G2E-001	20250110	1	707	0.024817	707	1	3	-145.5|-226.5|-1679.5	4|4|5	0.0740740740740741|0.157894736842105|0.225806451612903	0.185185185185185|0|0.0967741935483871	0.111111111111111|0.157894736842105|0.129032258064516	27|19|31	NA|1|NA	NA|4|NA	NA|2|NA	+|-|-	2	840.5|312	5|5	0.28|0.142857142857143	0|0.107142857142857	0|0.0714285714285714	25|28	NA|NA	NA|NA	NA|NA	+|-	0.472105579	705	-5.33252746377914	-5.21619635402589	3.81909671972157
2014	chr1	+	ENSG00000158825.5	processed_transcript,	protein_coding	1.85628	2.3328	2089	20915579	20945396	29818	protein_coding	KNOWN	CDA	processed_transcript	CDA-002	20915579	1	727	2.09454	727	1	3	-1931|-1609.5|-1424.5	4|4|5	0.0555555555555556|0.217391304347826|0.257142857142857	0.111111111111111|0.0434782608695652|0.0571428571428571	0.111111111111111|0.0869565217391304|0.0285714285714286	18|23|35	2|NA|NA	2|NA|NA	1|NA|NA	+|+|-	0	NA	NA	NA	NA	NA	NA	NA	NA	NA	NA	0.477704459	725	1.06663343600706	-2.97595271826367	3.39999244983721
2042	chr1	-	ENSG00000189410.7	processed_transcript,protein_coding,	protein_coding	0.0530366	0.099268	2117	21046225	21059330	13106	protein_coding	KNOWN	SH2D5	processed_transcript	SH2D5-002	21059330	1	735	0.1523046	735	1	0	NA	NA	NA	NA	NA	NA	NA	NA	NA	NA	3	900.5|858.5|737	5|4|6	0.103448275862069|0.0869565217391304|0.075	0.137931034482759|0.173913043478261|0.2	0.103448275862069|0|0.025	29|23|40	NA|NA|NA	NA|NA|NA	NA|NA|NA	-|-|-	0.484903019	733	-2.71496857921469	-3.21088336282549	4.7888322706242
2082	chr1	-	ENSG00000075151.13	protein_coding,	protein_coding	5.9401	6.70059	2157	21276499	21503377	226879	protein_coding	KNOWN	EIF4G3	protein_coding	EIF4G3-004	21503377	1	748	6.320345	748	1	1	-856	4	0	0.041666667	0.208333333	24	NA	NA	NA	-	2	993.5|408.5	5|13	0.216216216216216|0.0857142857142857	0.0540540540540541|0.20952380952381	0.0810810810810811|0.0380952380952381	37|105	NA|NA	NA|NA	NA|NA	+|+	0.457908418	746	2.66000331096637	-1.40850817203713	2.52286127557082
2097	chr1	-	ENSG00000117298.10	protein_coding,	protein_coding	12.6758	14.7909	2172	21543740	21671997	128258	protein_coding	KNOWN	ECE1	protein_coding	ECE1-001	21671997	1	753	13.73335	753	1	1	-134.5	4	0.074074074	0.259259259	0.074074074	27	4	7	3	-	5	1325|929.5|849|495.5|81	4|4|4|5|4	0.166666666666667|0.032258064516129|0.291666666666667|0.0344827586206897|0.125	0.0333333333333333|0.129032258064516|0.0416666666666667|0.275862068965517|0.208333333333333	0.133333333333333|0.193548387096774|0.0416666666666667|0.103448275862069|0.0416666666666667	30|31|24|29|24	NA|NA|NA|NA|4	NA|NA|NA|NA|4	NA|NA|NA|NA|3	+|-|-|-|-	0.50909818	751	3.77961168241713	-1.12154614972216	4.22499784514983
2100	chr1	+	ENSG00000243358.1	tRNA_pseudogene,	tRNA_pseudogene	0.0530366	0	2175	21740714	21740785	72	tRNA_pseudogene	NOVEL	AL592309.1	tRNA_pseudogene	AL592309.1-201	21740714	1	756	0.0265183	756	1	0	NA	NA	NA	NA	NA	NA	NA	NA	NA	NA	4	198.5|714|1043.5|1482.5	4|4|4|5	0.0740740740740741|0.115384615384615|0.259259259259259|0.108108108108108	0.148148148148148|0.192307692307692|0.0740740740740741|0.216216216216216	0.222222222222222|0.115384615384615|0.037037037037037|0.135135135135135	27|26|27|37	NA|NA|NA|NA	NA|NA|NA|NA	NA|NA|NA|NA	-|+|+|+	0.415316937	754	-5.23686789773981	-5.25423428132905	2.23602297111531
2111	chr1	+	ENSG00000142794.11	protein_coding,protein_coding,processed_transcript,	protein_coding	2.54576	2.82914	2186	21766631	21811392	44762	protein_coding	KNOWN	NBPF3	protein_coding	NBPF3-201	21766631	1	761	8.06235	761	1	1	-337	4	0.088235294	0.323529412	0.058823529	34	NA	NA	NA	+	1	326	5	0.03125	0.03125	0.125	32	NA	NA	NA	+	0.572685463	759	3.0112004143356	-1.50511956757362	4.1912158660127
2157	chr1	-	ENSG00000090686.11	protein_coding,	protein_coding	4.61419	3.57365	2233	22004791	22109688	104898	protein_coding	KNOWN	USP48	protein_coding	USP48-201	22109688	1	770	4.09392	770	1	0	NA	NA	NA	NA	NA	NA	NA	NA	NA	NA	1	69	4	0	0.222222222	0.055555556	18	2	3	1	-	0.49570086	768	2.03348291068303	-1.88522783201307	5.5487204740088
2193	chr1	+	ENSG00000070831.11	protein_coding,	protein_coding	178.84	156.496	2275	22379161	22419437	40277	protein_coding	KNOWN	CDC42	protein_coding	CDC42-001	22379161	1	783	167.668	783	1	0	NA	NA	NA	NA	NA	NA	NA	NA	NA	NA	5	191.5|342.5|418.5|485.5|602	5|4|5|4|4	0.0810810810810811|0.0740740740740741|0.0689655172413793|0|0.0416666666666667	0.162162162162162|0.259259259259259|0.206896551724138|0.285714285714286|0.0416666666666667	0.135135135135135|0.037037037037037|0.0344827586206897|0.0952380952380952|0.0416666666666667	37|27|29|21|24	NA|NA|NA|5|NA	NA|NA|NA|2|NA	NA|NA|NA|2|NA	+|+|-|+|+	0.49290142	781	7.38946356176274	-1.62815788467901	6.0863253875165
2232	chr1	+	ENSG00000004487.10	protein_coding,	protein_coding	18.6159	13.2523	2315	23345988	23410182	64195	protein_coding	KNOWN	KDM1A	protein_coding	KDM1A-201	23345988	1	800	15.9341	800	1	2	-647.5|-81.5	5|4	0.171428571428571|0.0434782608695652	0.0571428571428571|0.130434782608696	0.114285714285714|0.0869565217391304	35|23	NA|NA	NA|NA	NA|NA	+|+	0	NA	NA	NA	NA	NA	NA	NA	NA	NA	NA	0.428714257	798	3.9940456290828	-2.46752537700444	7.39940362021775
2237	chr1	-	ENSG00000169641.9	protein_coding,	protein_coding	0.265183	0.148902	2320	23410516	23435623	25108	protein_coding	KNOWN	LUZP1	protein_coding	LUZP1-201	23435623	1	802	0.2070425	802	1	0	NA	NA	NA	NA	NA	NA	NA	NA	NA	NA	0	NA	NA	NA	NA	NA	NA	NA	NA	NA	NA	0.428914217	800	-2.27200115206261	-5.12275515546978	2.26711866961701
2257	chr1	-	ENSG00000125944.12	processed_transcript,	protein_coding	77.1683	93.5601	2340	23644976	23670779	25804	protein_coding	KNOWN	HNRNPR	processed_transcript	HNRNPR-011	23670779	1	809	85.3642	809	1	1	-485	4	0.15625	0.125	0.09375	32	NA	NA	NA	-	2	512|195.5	4|5	0.0769230769230769|0.037037037037037	0.0769230769230769|0.0740740740740741	0.115384615384615|0.111111111111111	26|27	NA|NA	NA|NA	NA|NA	-|-	0.48810238	807	6.41555925476698	-1.88682766868993	6.79717398160384
2262	chr1	-	ENSG00000125945.9	protein_coding,	protein_coding	0.530366	0.297804	2345	23686467	23694831	8365	protein_coding	KNOWN	ZNF436	protein_coding	ZNF436-002	23694831	1	810	0.414085	810	1	0	NA	NA	NA	NA	NA	NA	NA	NA	NA	NA	0	NA	NA	NA	NA	NA	NA	NA	NA	NA	NA	0.518496301	808	-1.27200115206261	-1.3040026154228	7.15127442997868
2269	chr1	-	ENSG00000125945.9	protein_coding,	protein_coding	0.106073	0	2352	23685941	23695935	9995	protein_coding	KNOWN	ZNF436	protein_coding	ZNF436-001	23695935	1	812	0.0530365	812	1	0	NA	NA	NA	NA	NA	NA	NA	NA	NA	NA	0	NA	NA	NA	NA	NA	NA	NA	NA	NA	NA	0.474505099	810	-4.23687061793002	-4.13286891978406	6.8022553695878
2291	chr1	-	ENSG00000117318.8	processed_transcript,	protein_coding	3.81864	2.6306	2378	23884936	23885934	999	protein_coding	KNOWN	ID3	processed_transcript	ID3-002	23885934	1	820	3.22462	820	1	1	-139	4	0.071428571	0.25	0	28	NA	NA	NA	-	2	1248.5|295	4|4	0.0952380952380952|0.15625	0.0476190476190476|0.15625	0.0952380952380952|0.09375	21|32	NA|NA	NA|NA	NA|NA	+|+	0.463107379	818	1.68912915854626	-3.62948306676838	7.35485772609785
2337	chr1	-	ENSG00000117305.8	protein_coding,	protein_coding	55.9006	54.9945	2427	24128379	24151915	23537	protein_coding	KNOWN	HMGCL	protein_coding	HMGCL-202	24151915	1	833	55.44755	833	1	0	NA	NA	NA	NA	NA	NA	NA	NA	NA	NA	1	330.5	4	0.130434783	0.217391304	0.086956522	23	NA	NA	NA	+	0.418316337	831	5.79305180990124	-2.40659073421063	7.91558070787109
2349	chr1	-	ENSG00000188822.6	protein_coding,	protein_coding	0.106073	0	2439	24197017	24285549	88533	protein_coding	KNOWN	CNR2	protein_coding	CNR2-201	24285549	1	840	0.0530365	840	1	2	-224|-1042	5|5	0.131578947368421|0.09375	0.157894736842105|0.28125	0.0789473684210526|0.0625	38|32	NA|NA	NA|NA	NA|NA	+|+	0	NA	NA	NA	NA	NA	NA	NA	NA	NA	NA	0.426314737	838	-4.23687061793002	-2.69711593998441	5.62838891627684
2351	chr1	+	ENSG00000189266.6	protein_coding,	protein_coding	6.9478	6.25389	2441	24286302	24289952	3651	protein_coding	KNOWN	PNRC2	protein_coding	PNRC2-001	24286302	1	841	6.600845	841	1	1	-529	5	0.131578947	0.157894737	0.078947368	38	NA	NA	NA	+	1	289	5	0.09375	0.28125	0.0625	32	NA	NA	NA	+	0.484903019	839	2.72265072133121	-2.05948895600752	7.84161598969408
2399	chr1	-	ENSG00000001460.12	protein_coding,protein_coding,	protein_coding	7.42513	7.24657	2491	24683527	24740230	56704	protein_coding	KNOWN	C1orf201	protein_coding	C1orf201-002	24740230	1	855	14.6717	855	1	1	-1792.5	4	0.2	0.12	0	25	NA	NA	NA	+	0	NA	NA	NA	NA	NA	NA	NA	NA	NA	NA	0.4925015	853	3.87496413968698	-1.68918996032211	6.37712387992145
2418	chr1	+	ENSG00000184454.6	protein_coding,	protein_coding	12.5697	15.6844	2512	24882602	24935816	53215	protein_coding	KNOWN	C1orf130	protein_coding	C1orf130-001	24882602	1	862	14.12705	862	1	1	-48.5	8	0.06122449	0.285714286	0.020408163	49	NA	NA	NA	+	1	174	5	0.147058824	0.147058824	0.029411765	34	NA	NA	NA	+	0.50569886	860	3.82038832951166	-3.34958833820997	5.09394919230999
2466	chr1	-	ENSG00000117614.5	processed_transcript,	protein_coding	149.882	137.437	2560	25556800	25558993	2194	protein_coding	KNOWN	SYF2	processed_transcript	SYF2-002	25558993	1	878	143.6595	878	1	0	NA	NA	NA	NA	NA	NA	NA	NA	NA	NA	0	NA	NA	NA	NA	NA	NA	NA	NA	NA	NA	0.457308538	876	7.16650958918684	-1.71406043230632	6.53626446225911
2502	chr1	-	ENSG00000188672.10	protein_coding,	protein_coding	0.212147	0.24817	2597	25688803	25756683	67881	protein_coding	KNOWN	RHCE	protein_coding	RHCE-005	25756683	1	893	0.2301585	893	1	2	-757|-1198.5	4|4	0.133333333333333|0.0476190476190476	0.0666666666666667|0.238095238095238	0.0333333333333333|0	30|21	NA|1	NA|2	NA|6	-|+	1	135.5	4	0.043478261	0.347826087	0	23	2	2	7	-	0.459708058	891	-2.11930037106811	-2.34812580045698	5.76289114538357
2506	chr1	+	ENSG00000157978.6	protein_coding,	protein_coding	6.41743	5.26121	2601	25870071	25895377	25307	protein_coding	KNOWN	LDLRAP1	protein_coding	LDLRAP1-001	25870071	1	895	5.83932	895	1	0	NA	NA	NA	NA	NA	NA	NA	NA	NA	NA	6	236.5|336|625.5|680.5|995.5|1650.5	4|4|4|6|4|4	0.0526315789473684|0.166666666666667|0.08|0.142857142857143|0.08|0.105263157894737	0.263157894736842|0.291666666666667|0.16|0.171428571428571|0.12|0	0.0526315789473684|0|0.04|0.0571428571428571|0.12|0.105263157894737	19|24|25|35|25|19	2|2|NA|NA|5|1	2|3|NA|NA|5|1	3|7|NA|NA|1|4	+|-|-|-|+|+	0.50989802	893	2.54580037428557	-1.68593700683235	5.26168155754758
2519	chr1	+	ENSG00000117643.9	processed_transcript,	protein_coding	0.0530366	0.099268	2614	26098560	26109191	10632	protein_coding	KNOWN	MAN1C1	processed_transcript	MAN1C1-004	26098560	1	899	0.0761523	899	1	1	-214.5	4	0.103448276	0.206896552	0.103448276	29	NA	NA	NA	+	1	1213.5	4	0	0	0.235294118	17	1	1	3	+	0.549290142	897	-3.71496857921469	-3.72163931620086	3.56637776989945
2525	chr1	+	ENSG00000117640.13	protein_coding,	protein_coding	0	0.198536	2621	26145131	26156005	10875	protein_coding	KNOWN	FAM54B	protein_coding	FAM54B-007	26145131	1	901	0.099268	901	1	3	-1572.5|-502|-455	4|4|4	0.0476190476190476|0.1|0.166666666666667	0|0.2|0.0833333333333333	0.142857142857143|0.05|0.125	21|20|24	NA|1|NA	NA|3|NA	NA|4|NA	-|+|-	2	1724|1830	5|4	0.0588235294117647|0.0666666666666667	0.264705882352941|0.3	0.176470588235294|0.0666666666666667	34|30	NA|NA	NA|NA	NA|NA	+|+	0.566286743	899	-3.33252746377914	-3.8221255159594	4.8304382716097
2544	chr1	-	ENSG00000223474.2	protein_coding,	protein_coding	0.371256	1.19122	2640	26145212	26147288	2077	protein_coding	KNOWN	AL020996.1	protein_coding	AL020996.1-201	26147288	1	904	0.781238	904	1	0	NA	NA	NA	NA	NA	NA	NA	NA	NA	NA	2	433|327	5|4	0.0588235294117647|0.0666666666666667	0.264705882352941|0.3	0.176470588235294|0.0666666666666667	34|30	NA|NA	NA|NA	NA|NA	+|+	0.478304339	902	-0.356165970191292	-2.47472483596464	7.14674486072817
2545	chr1	+	ENSG00000117640.13	protein_coding,	protein_coding	0.15911	0.049634	2641	26147319	26159429	12111	protein_coding	KNOWN	FAM54B	protein_coding	FAM54B-201	26147319	1	905	0.104372	905	1	2	-464|-358	5|4	0.0588235294117647|0.0666666666666667	0.264705882352941|0.3	0.176470588235294|0.0666666666666667	34|30	NA|NA	NA|NA	NA|NA	+|+	0	NA	NA	NA	NA	NA	NA	NA	NA	NA	NA	0.580283943	903	-3.26019336458042	-2.44378349000495	6.2866964897693
2550	chr1	-	ENSG00000127423.6	protein_coding,protein_coding,	protein_coding	2.38665	0.645242	2646	26160497	26185903	25407	protein_coding	KNOWN	C1orf135	protein_coding	C1orf135-001	26185903	1	906	3.031892	906	1	1	-98.5	4	0.037037037	0.259259259	0.074074074	27	NA	NA	NA	-	2	318.5|149.5	4|4	0.130434782608696|0.137931034482759	0.0434782608695652|0.103448275862069	0.130434782608696|0.137931034482759	23|29	NA|NA	NA|NA	NA|NA	-|-	0.525494901	904	1.60021836372026	-1.5407740767034	6.27262059042881
2552	chr1	-	ENSG00000182749.5	protein_coding,	protein_coding	0.0530366	0	2648	26187701	26197744	10044	protein_coding	KNOWN	PAQR7	protein_coding	PAQR7-001	26197744	1	908	0.0265183	908	1	0	NA	NA	NA	NA	NA	NA	NA	NA	NA	NA	1	866.5	5	0.114285714	0.2	0.114285714	35	NA	NA	NA	+	0.563287343	906	-5.23686789773981	-4.44533061778575	3.17114402965874
2562	chr1	-	ENSG00000117632.16	protein_coding,protein_coding,	protein_coding	419.838	257.055	2658	26211931	26232957	21027	protein_coding	KNOWN	STMN1	protein_coding	STMN1-008	26232957	1	912	676.893	912	1	1	-494	4	0.066666667	0.233333333	0.066666667	30	NA	NA	NA	-	4	899|825.5|394|200.5	4|5|6|7	0.153846153846154|0.130434782608696|0.2|0.0212765957446809	0.115384615384615|0.0434782608695652|0.133333333333333|0.191489361702128	0|0.0434782608695652|0|0.106382978723404	26|23|30|47	NA|NA|NA|NA	NA|NA|NA|NA	NA|NA|NA|NA	-|+|+|-	0.485702859	910	9.40278398728307	-1.56021303647716	5.01523030447001
2568	chr1	-	ENSG00000158006.8	protein_coding,	protein_coding	6.57654	7.69327	2664	26310493	26324546	14054	protein_coding	KNOWN	PAFAH2	protein_coding	PAFAH2-003	26324546	1	914	7.134905	914	1	1	-1145	5	0.058823529	0.088235294	0.117647059	34	NA	NA	NA	-	2	270|193	5|4	0.0333333333333333|0.2	0.2|0.1	0.133333333333333|0.05	30|20	NA|1	NA|4	NA|3	+|+	0.476304739	912	2.83489422059924	-1.889497796317	6.10681747561887
2575	chr1	+	ENSG00000158008.5	protein_coding,	protein_coding	0.742513	0.943046	2671	26348271	26362955	14685	protein_coding	KNOWN	EXTL1	protein_coding	EXTL1-001	26348271	1	917	0.8427795	917	1	0	NA	NA	NA	NA	NA	NA	NA	NA	NA	NA	2	1469|1536.5	5|4	0.25|0.103448275862069	0.0714285714285714|0.275862068965517	0.107142857142857|0.103448275862069	28|29	NA|6	NA|7	NA|2	-|-	0.527494501	915	-0.246772872815714	-3.07459602284598	4.27055944014565
2585	chr1	+	ENSG00000175087.5	protein_coding,	protein_coding	0.371256	0.794144	2681	26438328	26452034	13707	protein_coding	KNOWN	PDIK1L	protein_coding	PDIK1L-001	26438328	1	920	0.5827	920	1	2	-438|-395.5	4|4	0|0.142857142857143	0.192307692307692|0.0476190476190476	0.153846153846154|0.0476190476190476	26|21	NA|1	NA|4	NA|1	-|+	1	268	4	0.038461538	0.153846154	0.076923077	26	NA	NA	NA	-	0.49770046	918	-0.779174784202128	-2.50061790995816	6.58611631720036
2590	chr1	-	ENSG00000236782.1	processed_transcript,	processed_transcript	0.0530366	0.049634	2686	26496671	26497304	634	processed_transcript	NOVEL	RP11-96L14.7	processed_transcript	RP11-96L14.7-005	26497304	1	923	0.0513353	923	1	0	NA	NA	NA	NA	NA	NA	NA	NA	NA	NA	0	NA	NA	NA	NA	NA	NA	NA	NA	NA	NA	0.50309938	921	-4.28390497366436	-5.17913562079695	5.93415807957645
2600	chr1	+	ENSG00000142675.11	nonsense_mediated_decay,nonsense_mediated_decay,	protein_coding	7.00084	7.69327	2696	26504003	26516373	12371	protein_coding	KNOWN	CNKSR1	nonsense_mediated_decay	CNKSR1-002	26504003	1	924	14.69411	924	1	1	-58.5	4	0	0.238095238	0.142857143	21	2	2	4	-	1	106	5	0.117647059	0.058823529	0.205882353	34	NA	NA	NA	+	0.480503899	922	3.877166074668	-3.76217198360419	4.41808251144598
2612	chr1	+	ENSG00000236155.1	processed_transcript,	pseudogene	0	0.099268	2709	26551811	26556331	4521	pseudogene	KNOWN	RP11-231P20.2	processed_transcript	RP11-231P20.2-002	26551811	1	926	0.049634	926	1	1	-495.5	4	0	0.142857143	0.142857143	21	3	1	4	+	1	199.5	6	0.076923077	0.153846154	0.153846154	39	NA	NA	NA	+	0.4935013	924	-4.33252746377914	-2.51209383932272	3.43226569459999
2622	chr1	+	ENSG00000142669.8	protein_coding,	protein_coding	17.0778	12.7063	2720	26606613	26607941	1329	protein_coding	KNOWN	SH3BGRL3	protein_coding	SH3BGRL3-002	26606613	1	931	14.89205	931	1	1	-113	5	0.117647059	0.205882353	0.058823529	34	NA	NA	NA	-	7	154|229.5|311.5|388|629|823.5|1351	4|4|5|5|4|5|4	0.0416666666666667|0.0434782608695652|0.0967741935483871|0.136363636363636|0.181818181818182|0.0606060606060606|0.107142857142857	0.208333333333333|0.304347826086957|0.0645161290322581|0|0.0454545454545455|0.0606060606060606|0.214285714285714	0.125|0.0869565217391304|0.193548387096774|0.0454545454545455|0.0909090909090909|0.121212121212121|0.142857142857143	24|23|31|22|22|33|28	1|4|NA|NA|5|NA|7	4|3|NA|NA|1|NA|3	5|3|NA|NA|2|NA|5	-|-|-|-|-|+|-	0.527294541	929	3.89647046004055	-1.92411962177609	4.58791748447198
2632	chr1	-	ENSG00000158062.13	protein_coding,protein_coding,retained_intron,protein_coding,	protein_coding	5.46277	5.75755	2730	26607819	26633127	25309	protein_coding	KNOWN	UBXN11	protein_coding	UBXN11-003	26633127	1	932	22.44064	932	1	1	-194	3	0	0.045454545	0.045454545	22	NA	NA	NA	+	1	1145.5	4	0.137931034	0.034482759	0.172413793	29	NA	NA	NA	-	0.481903619	930	4.48804191662995	-1.45560955838842	6.55412232985907
2638	chr1	+	ENSG00000169442.4	processed_transcript,processed_transcript,	protein_coding	0.15911	0.794144	2736	26644449	26646815	2367	protein_coding	KNOWN	CD52	processed_transcript	CD52-002	26644449	1	933	0.953254	933	1	3	-1462|-1174|-1101	4|4|5	0.166666666666667|0.0909090909090909|0.266666666666667	0.0416666666666667|0.136363636363636|0.0666666666666667	0.0416666666666667|0.0454545454545455|0.0333333333333333	24|22|30	NA|NA|NA	NA|NA|NA	NA|NA|NA	+|-|-	1	1825	4	0.227272727	0.045454545	0.045454545	22	NA	NA	NA	+	0.475904819	931	-0.0690674151535895	-4.75629194339846	2.42910923379364
2676	chr1	+	ENSG00000117682.10	processed_transcript,protein_coding,protein_coding,	protein_coding	10.3952	9.38083	2774	26758862	26769254	10393	protein_coding	KNOWN	DHDDS	protein_coding	DHDDS-023	26758862	1	940	29.664045	940	1	0	NA	NA	NA	NA	NA	NA	NA	NA	NA	NA	0	NA	NA	NA	NA	NA	NA	NA	NA	NA	NA	0.459308138	938	4.89064343251615	-1.45481838057792	7.27673123000799
2738	chr1	+	ENSG00000175793.9	protein_coding,	protein_coding	7.63728	7.79254	2842	27189633	27190947	1315	protein_coding	KNOWN	SFN	protein_coding	SFN-001	27189633	1	957	7.71491	957	1	1	-60.5	5	0.161290323	0.129032258	0.032258065	31	NA	NA	NA	-	3	843|1517|1878	6|4|4	0.075|0.111111111111111|0.1	0.125|0.166666666666667|0.15	0.075|0.0555555555555556|0.1	40|18|20	NA|3|1	NA|1|2	NA|2|5	-|+|+	0.50669866	955	2.94764932681402	-3.46911418392886	4.49630946038791
2745	chr1	-	ENSG00000142751.7	protein_coding,	protein_coding	14.532	13.7486	2849	27212464	27216751	4288	protein_coding	KNOWN	GPN2	protein_coding	GPN2-003	27216751	1	959	14.1403	959	1	1	-564	4	0.15	0.05	0	20	NA	NA	NA	+	0	NA	NA	NA	NA	NA	NA	NA	NA	NA	NA	0.518096381	957	3.82174082351565	-2.34959570310448	7.04284572217382
2750	chr1	-	ENSG00000198746.7	protein_coding,	protein_coding	17.6082	12.7063	2855	27216980	27226957	9978	protein_coding	KNOWN	GPATCH3	protein_coding	GPATCH3-001	27226957	1	963	15.15725	963	1	1	-1960.5	4	0.222222222	0.074074074	0.111111111	27	7	1	7	-	0	NA	NA	NA	NA	NA	NA	NA	NA	NA	NA	0.442111578	961	3.92193612206081	-3.29193107591685	7.09793105428701
2754	chr1	+	ENSG00000090273.8	protein_coding,	protein_coding	120.605	102.494	2859	27248217	27273353	25137	protein_coding	KNOWN	NUDC	protein_coding	NUDC-001	27248217	1	965	111.5495	965	1	0	NA	NA	NA	NA	NA	NA	NA	NA	NA	NA	0	NA	NA	NA	NA	NA	NA	NA	NA	NA	NA	0.475104979	963	6.80154023675761	-1.97368998307708	7.5173891532125
2793	chr1	+	ENSG00000142765.12	nonsense_mediated_decay,	protein_coding	7.69031	6.45242	2904	27668548	27680421	11874	protein_coding	KNOWN	SYTL1	nonsense_mediated_decay	SYTL1-003	27668548	1	989	7.071365	989	1	1	-840.5	4	0.095238095	0.095238095	0.095238095	21	NA	NA	NA	+	0	NA	NA	NA	NA	NA	NA	NA	NA	NA	NA	0.532893421	987	2.82198872828102	-2.93014936122834	5.74087382312239
2815	chr1	+	ENSG00000181773.6	protein_coding,	protein_coding	0.530366	0.297804	2928	27719148	27722318	3171	protein_coding	KNOWN	GPR3	protein_coding	GPR3-001	27719148	1	994	0.414085	994	1	3	-806|-480.5|-187	5|4|4	0.1875|0.185185185185185|0.125	0.15625|0.111111111111111|0.166666666666667	0.09375|0.037037037037037|0.0416666666666667	32|27|24	NA|NA|NA	NA|NA|NA	NA|NA|NA	-|-|+	2	584.5|1097.5	4|4	0.0476190476190476|0.103448275862069	0|0.0344827586206897	0.0952380952380952|0.206896551724138	21|29	NA|NA	NA|NA	NA|NA	+|-	0.521695661	992	-1.27200115206261	-1.46752937711503	5.66651824566475
2847	chr1	+	ENSG00000009780.10	protein_coding,protein_coding,protein_coding,	protein_coding	1.27288	1.73719	2960	28052539	28087092	34554	protein_coding	KNOWN	FAM76A	protein_coding	FAM76A-004	28052539	1	1007	4.515105	1007	1	1	-77.5	8	0.042553191	0.255319149	0.042553191	47	NA	NA	NA	-	1	290.5	4	0.064516129	0.258064516	0.032258065	31	NA	NA	NA	+	0.50729854	1005	2.17475953836347	-1.54119383194212	6.54369395590168
2853	chr1	+	ENSG00000117758.8	protein_coding,	protein_coding	9.5466	12.0114	2967	28099746	28144419	44674	protein_coding	KNOWN	STX12	protein_coding	STX12-002	28099746	1	1011	10.779	1011	1	1	-1066.5	4	0	0	0.157894737	19	NA	NA	NA	+	1	370	4	0.107142857	0.357142857	0.035714286	28	NA	NA	NA	-	0.434513097	1009	3.43015143606123	-1.39554522250584	6.92384335008156
2897	chr1	-	ENSG00000228589.2	retrotransposed,	pseudogene	0.530366	0.74451	3013	28421582	28422833	1252	pseudogene	KNOWN	RP5-1053E7.1	retrotransposed	RP5-1053E7.1-201	28422833	1	1027	0.637438	1027	1	0	NA	NA	NA	NA	NA	NA	NA	NA	NA	NA	0	NA	NA	NA	NA	NA	NA	NA	NA	NA	NA	0.461707658	1025	-0.649643068903947	-3.17395719805389	2.24610644807905
2904	chr1	-	ENSG00000169403.7	protein_coding,	protein_coding	3.34131	3.62328	3020	28476184	28520384	44201	protein_coding	KNOWN	PTAFR	protein_coding	PTAFR-002	28520384	1	1032	3.482295	1032	1	2	-104|-263	4|5	0.0454545454545455|0.125	0.181818181818182|0.125	0.181818181818182|0.125	22|32	7|NA	1|NA	2|NA	+|+	1	619.5	4	0.04	0.12	0.24	25	4	6	2	+	0.523095381	1030	1.80003842499061	-3.10654770139401	4.0983865410082
2923	chr1	+	ENSG00000204138.7	processed_transcript,	protein_coding	7.47817	10.7706	3039	28696250	28793752	97503	protein_coding	KNOWN	PHACTR4	processed_transcript	PHACTR4-003	28696250	1	1039	9.124385	1039	1	0	NA	NA	NA	NA	NA	NA	NA	NA	NA	NA	2	237.5|697	4|4	0.0526315789473684|0.192307692307692	0.210526315789474|0	0|0.115384615384615	19|26	NA|6	NA|1	NA|5	+|-	0.474905019	1037	3.18972732191006	-1.49776721520341	7.4964815562709
2926	chr1	+	ENSG00000204138.7	protein_coding,	protein_coding	0.15911	0.198536	3042	28764682	28826820	62139	protein_coding	KNOWN	PHACTR4	protein_coding	PHACTR4-004	28764682	1	1041	0.178823	1041	1	0	NA	NA	NA	NA	NA	NA	NA	NA	NA	NA	0	NA	NA	NA	NA	NA	NA	NA	NA	NA	NA	0.411517696	1039	-2.48339578872444	-3.50797661815163	4.50558659791205
2930	chr1	+	ENSG00000180198.9	protein_coding,	protein_coding	0.689476	0.794144	3046	28832455	28865708	33254	protein_coding	KNOWN	RCC1	protein_coding	RCC1-201	28832455	1	1045	0.74181	1045	1	0	NA	NA	NA	NA	NA	NA	NA	NA	NA	NA	0	NA	NA	NA	NA	NA	NA	NA	NA	NA	NA	0.473905219	1043	-0.430878378605934	-2.13859402600607	6.67508776266835
2931	chr1	+	ENSG00000242125.1	non_coding,	processed_transcript	1.16681	1.04231	3047	28832492	28837404	4913	processed_transcript	KNOWN	SNHG3	non_coding	SNHG3-001	28832492	1	1046	1.10456	1046	1	0	NA	NA	NA	NA	NA	NA	NA	NA	NA	NA	0	NA	NA	NA	NA	NA	NA	NA	NA	NA	NA	0.472905419	1044	0.143471788409243	-2.34665738657046	6.83831154790249
2932	chr1	+	ENSG00000180198.9	protein_coding,	protein_coding	2.97005	2.58097	3048	28832502	28862411	29910	protein_coding	KNOWN	RCC1	protein_coding	RCC1-012	28832502	1	1047	2.77551	1047	1	0	NA	NA	NA	NA	NA	NA	NA	NA	NA	NA	0	NA	NA	NA	NA	NA	NA	NA	NA	NA	NA	0.473705259	1045	1.47275289105461	-2.42351851371104	6.86535974646064
2933	chr1	+	ENSG00000242125.1	processed_transcript,	processed_transcript	291.118	205.187	3049	28832555	28834782	2228	processed_transcript	KNOWN	SNHG3	processed_transcript	SNHG3-003	28832555	1	1048	248.1525	1048	1	0	NA	NA	NA	NA	NA	NA	NA	NA	NA	NA	0	NA	NA	NA	NA	NA	NA	NA	NA	NA	NA	0.473305339	1046	7.9550831788423	-2.94896482755122	6.87774926913888
2934	chr1	+	ENSG00000180198.9	protein_coding,	protein_coding	291.012	205.088	3050	28832568	28862431	29864	protein_coding	KNOWN	RCC1	protein_coding	RCC1-007	28832568	1	1049	248.05	1049	1	0	NA	NA	NA	NA	NA	NA	NA	NA	NA	NA	0	NA	NA	NA	NA	NA	NA	NA	NA	NA	NA	0.473105379	1047	7.95448714700532	-3.10406454852769	6.85271812493917
2938	chr1	+	ENSG00000200087.1	snoRNA,	snoRNA	0.0530366	0	3054	28835071	28835274	204	snoRNA	KNOWN	SNORA73B	snoRNA	SNORA73B-201	28835071	1	1052	0.0265183	1052	1	0	NA	NA	NA	NA	NA	NA	NA	NA	NA	NA	0	NA	NA	NA	NA	NA	NA	NA	NA	NA	NA	0.474105179	1050	-5.23686789773981	-5.24873850306331	6.06790555476161
2939	chr1	+	ENSG00000180198.9	protein_coding,	protein_coding	0	0.049634	3055	28836589	28862538	25950	protein_coding	KNOWN	RCC1	protein_coding	RCC1-005	28836589	1	1053	0.024817	1053	1	0	NA	NA	NA	NA	NA	NA	NA	NA	NA	NA	0	NA	NA	NA	NA	NA	NA	NA	NA	NA	NA	0.462107578	1051	-5.33252746377914	-5.16353932812267	4.76347576051522
2944	chr1	+	ENSG00000180198.9	protein_coding,	protein_coding	13.3122	12.0114	3060	28844778	28863387	18610	protein_coding	KNOWN	RCC1	protein_coding	RCC1-006	28844778	1	1056	12.6618	1056	1	1	-643	4	0.230769231	0.076923077	0.230769231	26	6	5	3	-	0	NA	NA	NA	NA	NA	NA	NA	NA	NA	NA	0.49410118	1054	3.66241060759049	-2.21624335594039	5.3350547276568
2960	chr1	-	ENSG00000221539.1	snoRNA,	snoRNA	1.90932	0.794144	3077	28905261	28905334	74	snoRNA	KNOWN	SNORD99	snoRNA	SNORD99-201	28905334	1	1061	1.351732	1061	1	0	NA	NA	NA	NA	NA	NA	NA	NA	NA	NA	0	NA	NA	NA	NA	NA	NA	NA	NA	NA	NA	0.514097181	1059	0.434809145261313	-5.32187035361656	2.78843682289459
2961	chr1	-	ENSG00000207311.1	snoRNA,	snoRNA	1.43199	1.14158	3078	28906276	28906405	130	snoRNA	KNOWN	SNORA61	snoRNA	SNORA61-201	28906405	1	1062	1.286785	1062	1	0	NA	NA	NA	NA	NA	NA	NA	NA	NA	NA	0	NA	NA	NA	NA	NA	NA	NA	NA	NA	NA	0.516096781	1060	0.363771023764353	-5.56654477726734	4.90612133385526
2962	chr1	-	ENSG00000207314.1	snoRNA,	snoRNA	0.106073	0.148902	3079	28906893	28907024	132	snoRNA	KNOWN	SNORA44	snoRNA	SNORA44-201	28907024	1	1063	0.1274875	1063	1	0	NA	NA	NA	NA	NA	NA	NA	NA	NA	NA	0	NA	NA	NA	NA	NA	NA	NA	NA	NA	NA	0.51209758	1061	-2.97157229542733	-5.36284047137832	4.40792425692056
2964	chr1	-	ENSG00000207070.1	snoRNA,	snoRNA	0.212147	0	3081	28907432	28907566	135	snoRNA	KNOWN	SNORA16A	snoRNA	SNORA16A-201	28907566	1	1065	0.1060735	1065	1	0	NA	NA	NA	NA	NA	NA	NA	NA	NA	NA	0	NA	NA	NA	NA	NA	NA	NA	NA	NA	NA	0.514497101	1063	-3.23686381746411	-4.88679027768624	6.73923255878078
2970	chr1	-	ENSG00000197989.8	processed_transcript,processed_transcript,	lincRNA	3.65953	4.71523	3087	28906847	28908365	1519	lincRNA	KNOWN	SNHG12	processed_transcript	SNHG12-009	28908365	1	1066	8.37476	1066	1	0	NA	NA	NA	NA	NA	NA	NA	NA	NA	NA	0	NA	NA	NA	NA	NA	NA	NA	NA	NA	NA	0.49510098	1064	3.06604784696272	-2.13668945449355	7.48114722674867
2976	chr1	+	ENSG00000188060.6	processed_transcript,	protein_coding	11.9863	13.9968	3093	28919027	28920812	1786	protein_coding	KNOWN	RAB42	processed_transcript	RAB42-002	28919027	1	1067	12.99155	1067	1	1	-62	5	0.035714286	0.25	0.035714286	28	NA	NA	NA	+	2	244|350	4|4	0.0909090909090909|0.15	0.181818181818182|0.25	0.0454545454545455|0	22|20	NA|1	NA|5	NA|2	+|-	0.49030194	1065	3.69950166146306	-3.13035284150459	6.6506670622808
3043	chr1	-	ENSG00000116353.8	processed_transcript,processed_transcript,	protein_coding	32.3524	32.957	3162	29543113	29557454	14342	protein_coding	KNOWN	MECR	processed_transcript	MECR-004	29557454	1	1088	65.3094	1088	1	1	-873.5	5	0.08	0	0.16	25	NA	NA	NA	+	0	NA	NA	NA	NA	NA	NA	NA	NA	NA	NA	0.468506299	1086	6.02921874910002	-1.67391830435242	6.34762331451995
3111	chr1	-	ENSG00000215900.3	processed_pseudogene,	pseudogene	0.0530366	0	3233	31567839	31568405	567	pseudogene	KNOWN	SEPW1P	processed_pseudogene	SEPW1P-001	31568405	1	1120	0.0265183	1120	1	0	NA	NA	NA	NA	NA	NA	NA	NA	NA	NA	0	NA	NA	NA	NA	NA	NA	NA	NA	NA	NA	0.465306939	1118	-5.23686789773981	-5.49323148940985	2.21051605837339
3142	chr1	+	ENSG00000168528.7	protein_coding,processed_transcript,	protein_coding	0.424293	0.545974	3264	31886660	31907524	20865	protein_coding	KNOWN	SERINC2	processed_transcript	SERINC2-003	31886660	1	1129	0.970267	1129	1	4	-750|-641.5|-493|-332	4|7|4|4	0.142857142857143|0.027027027027027|0|0.115384615384615	0.214285714285714|0.216216216216216|0.25|0.192307692307692	0.0714285714285714|0|0.05|0.0384615384615385	28|37|20|26	NA|NA|NA|NA	NA|NA|NA|NA	NA|NA|NA|NA	-|+|-|-	2	445.5|1398.5	5|4	0.258064516129032|0.217391304347826	0.0645161290322581|0	0.032258064516129|0.0869565217391304	31|23	NA|2	NA|1	NA|7	-|-	0.550089982	1127	-0.0435462892669135	-2.70650236551856	6.34085436856359
3171	chr1	-	ENSG00000162517.8	protein_coding,	protein_coding	17.2369	18.7617	3293	32099887	32110474	10588	protein_coding	KNOWN	PEF1	protein_coding	PEF1-201	32110474	1	1137	17.9993	1137	1	0	NA	NA	NA	NA	NA	NA	NA	NA	NA	NA	0	NA	NA	NA	NA	NA	NA	NA	NA	NA	NA	0.468906219	1135	4.16986889554421	-1.36326723999383	6.96578437509598
3246	chr1	-	ENSG00000184007.10	processed_transcript,	protein_coding	12.1454	8.33852	3368	32384861	32403959	19099	protein_coding	KNOWN	PTP4A2	processed_transcript	PTP4A2-009	32403959	1	1149	10.24196	1149	1	1	-1341	4	0.136363636	0.045454545	0.181818182	22	NA	NA	NA	+	3	713.5|511|424.5	9|9|5	0.142857142857143|0.0769230769230769|0.111111111111111	0.0476190476190476|0.192307692307692|0.148148148148148	0.174603174603175|0.0384615384615385|0.037037037037037	63|52|27	NA|NA|NA	NA|NA|NA	NA|NA|NA	-|-|-	0.51069786	1147	3.35641992464878	-1.57432159582245	5.13788083406183
3261	chr1	+	ENSG00000121775.12	protein_coding,	protein_coding	5.72796	6.05535	3383	32538567	32566156	27590	protein_coding	KNOWN	TMEM39B	protein_coding	TMEM39B-204	32538567	1	1151	5.891655	1151	1	0	NA	NA	NA	NA	NA	NA	NA	NA	NA	NA	1	1795	4	0.090909091	0.045454545	0.136363636	22	1	7	1	+	0.49510098	1149	2.55867295237619	-1.95622997278573	4.52692065098439
3267	chr1	-	ENSG00000203325.3	processed_transcript,	processed_transcript	0.0530366	0	3389	32517892	32539075	21184	processed_transcript	NOVEL	RP11-277A4.4	processed_transcript	RP11-277A4.4-001	32539075	1	1152	0.0265183	1152	1	1	-1287	4	0.090909091	0.045454545	0.136363636	22	1	7	1	+	0	NA	NA	NA	NA	NA	NA	NA	NA	NA	NA	0.50689862	1150	-5.23686789773981	-3.06369864755923	4.40618343711774
3273	chr1	+	ENSG00000025800.8	protein_coding,	protein_coding	8.5389	11.5151	3395	32573669	32638774	65106	protein_coding	KNOWN	KPNA6	protein_coding	KPNA6-201	32573669	1	1156	10.027	1156	1	0	NA	NA	NA	NA	NA	NA	NA	NA	NA	NA	1	106	5	0.058823529	0.176470588	0.235294118	34	NA	NA	NA	+	0.481303739	1154	3.32581812232073	-2.89645801990124	7.86981468057486
3287	chr1	+	ENSG00000160051.7	protein_coding,	protein_coding	0.79555	0.446706	3409	32671236	32674288	3053	protein_coding	KNOWN	IQCC	protein_coding	IQCC-001	32671236	1	1160	0.621128	1160	1	2	-547.5|-124	4|4	0.0869565217391304|0.0769230769230769	0.217391304347826|0.115384615384615	0.0869565217391304|0.0769230769230769	23|26	NA|NA	NA|NA	NA|NA	-|+	3	266.5|695.5|1530	5|4|4	0.142857142857143|0.217391304347826|0.136363636363636	0.171428571428571|0.0869565217391304|0.0454545454545455	0.0857142857142857|0.0869565217391304|0.181818181818182	35|23|22	NA|5|NA	NA|4|NA	NA|2|NA	-|+|+	0.556088782	1158	-0.687037489990149	-1.25945751959329	7.02371673725077
3297	chr1	-	ENSG00000160055.15	retained_intron,	protein_coding	3.55346	4.26853	3419	32682331	32687920	5590	protein_coding	KNOWN	TMEM234	retained_intron	TMEM234-007	32687920	1	1165	3.910995	1165	1	1	-337	4	0.05	0.15	0.05	20	NA	NA	NA	+	0	NA	NA	NA	NA	NA	NA	NA	NA	NA	NA	0.51209758	1163	1.96753569166283	-1.7417778018102	5.23009567685595
3306	chr1	+	ENSG00000084623.7	protein_coding,	protein_coding	20.0479	13.4012	3428	32687971	32697205	9235	protein_coding	KNOWN	EIF3I	protein_coding	EIF3I-001	32687971	1	1166	16.72455	1166	1	0	NA	NA	NA	NA	NA	NA	NA	NA	NA	NA	1	286	4	0.05	0.15	0.05	20	NA	NA	NA	+	0.49490102	1164	4.06389548832496	-1.5589373022449	7.36799657349625
3307	chr1	-	ENSG00000160055.15	protein_coding,	protein_coding	3.28827	3.87145	3429	32681697	32687972	6276	protein_coding	KNOWN	TMEM234	protein_coding	TMEM234-201	32687972	1	1167	3.57986	1167	1	1	-285	4	0.05	0.15	0.05	20	NA	NA	NA	+	0	NA	NA	NA	NA	NA	NA	NA	NA	NA	NA	0.50969806	1165	1.83990316814453	-2.12342767638224	5.59402319783051
3308	chr1	+	ENSG00000084623.7	processed_transcript,	protein_coding	21.3207	14.9895	3430	32688008	32692073	4066	protein_coding	KNOWN	EIF3I	processed_transcript	EIF3I-006	32688008	1	1168	18.1551	1168	1	0	NA	NA	NA	NA	NA	NA	NA	NA	NA	NA	1	249	4	0.05	0.15	0.05	20	NA	NA	NA	+	0.49510098	1166	4.18230297154747	-1.6799151400583	7.2121802775236
3368	chr1	+	ENSG00000160062.9	protein_coding,	protein_coding	1.06073	0.843778	3490	33005028	33066385	61358	protein_coding	KNOWN	ZBTB8A	protein_coding	ZBTB8A-002	33005028	1	1190	0.952254	1190	1	2	-1652|-100	5|4	0.0416666666666667|0.181818181818182	0|0.0909090909090909	0.208333333333333|0.0454545454545455	24|22	NA|NA	NA|NA	NA|NA	+|+	2	187|548	5|6	0|0.0882352941176471	0.285714285714286|0.205882352941176	0.0714285714285714|0	28|34	NA|NA	NA|NA	NA|NA	+|+	0.448110378	1188	-0.0705816519590323	-3.16746153226886	2.32023114967337
3376	chr1	-	ENSG00000176261.10	processed_transcript,processed_transcript,processed_transcript,	protein_coding	112.756	125.673	3498	33099959	33116136	16178	protein_coding	KNOWN	ZBTB8OS	processed_transcript	ZBTB8OS-011	33116136	1	1193	357.6435	1193	1	0	NA	NA	NA	NA	NA	NA	NA	NA	NA	NA	0	NA	NA	NA	NA	NA	NA	NA	NA	NA	NA	0.483303339	1191	8.48237841124438	-2.79484778168625	7.11007512178486
3480	chr1	+	ENSG00000142920.11	protein_coding,protein_coding,	protein_coding	0.0530366	0.24817	3605	33546768	33586130	39363	protein_coding	KNOWN	ADC	protein_coding	ADC-001	33546768	1	1217	0.3012066	1217	1	1	-55.5	4	0	0.210526316	0.052631579	19	NA	NA	NA	+	3	920.5|989|1201.5	4|4|4	0.08|0.205882352941176|0.0952380952380952	0.08|0.117647058823529|0.0476190476190476	0.2|0.0588235294117647|0.142857142857143	25|34|21	1|NA|NA	7|NA|NA	3|NA|NA	+|-|+	0.461907618	1215	-1.73117471238433	-1.54877145336775	5.6450793308846
3504	chr1	-	ENSG00000134686.11	processed_transcript,	protein_coding	0.0530366	0	3629	33796965	33800857	3893	protein_coding	KNOWN	PHC2	processed_transcript	PHC2-008	33800857	1	1223	0.0265183	1223	1	1	-651	2	0.0625	0	0	16	NA	NA	NA	+	0	NA	NA	NA	NA	NA	NA	NA	NA	NA	NA	0.446510698	1221	-5.23686789773981	-5.06849541826772	4.26270435050201
3566	chr1	-	ENSG00000163866.7	protein_coding,	protein_coding	17.8733	19.4069	3691	35320770	35325356	4587	protein_coding	KNOWN	C1orf212	protein_coding	C1orf212-004	35325356	1	1249	18.6401	1249	1	2	-702|-1714	5|6	0.142857142857143|0.176470588235294	0.0714285714285714|0.0588235294117647	0.178571428571429|0.0294117647058824	28|34	NA|NA	NA|NA	NA|NA	-|+	2	314|58.5	4|4	0.181818181818182|0.0689655172413793	0.181818181818182|0.172413793103448	0.0454545454545455|0.137931034482759	22|29	NA|NA	NA|NA	NA|NA	-|-	0.470105979	1247	4.22033769463906	-1.19429148871333	7.64777791914089
3573	chr1	-	ENSG00000241014.1	processed_transcript,	processed_transcript	16.2292	15.6347	3698	35439957	35450914	10958	processed_transcript	NOVEL	RP11-244H3.1	processed_transcript	RP11-244H3.1-002	35450914	1	1252	15.93195	1252	1	0	NA	NA	NA	NA	NA	NA	NA	NA	NA	NA	2	393.5|138	4|4	0.0476190476190476|0.0909090909090909	0.0952380952380952|0.181818181818182	0.0952380952380952|0.0454545454545455	21|22	NA|NA	NA|NA	NA|NA	+|-	0.395520896	1250	3.99385095203042	-2.46036167500993	5.0291351515735
3574	chr1	-	ENSG00000243749.1	protein_coding,	protein_coding	16.3353	15.6844	3699	35447136	35450954	3819	protein_coding	NOVEL	RP11-244H3.2	protein_coding	RP11-244H3.2-001	35450954	1	1253	16.00985	1253	1	0	NA	NA	NA	NA	NA	NA	NA	NA	NA	NA	2	433.5|178	4|4	0.0476190476190476|0.0909090909090909	0.0952380952380952|0.181818181818182	0.0952380952380952|0.0454545454545455	21|22	NA|NA	NA|NA	NA|NA	+|-	0.392321536	1251	4.00088788586021	-2.60383174427893	5.25590887711568
3584	chr1	-	ENSG00000163867.11	protein_coding,protein_coding,	protein_coding	15.964	30.8724	3709	35452581	35497569	44989	protein_coding	KNOWN	ZMYM6	protein_coding	ZMYM6-001	35497569	1	1254	46.8364	1254	1	0	NA	NA	NA	NA	NA	NA	NA	NA	NA	NA	0	NA	NA	NA	NA	NA	NA	NA	NA	NA	NA	0.373925215	1252	5.54955828469437	-3.17135538732535	5.92756483547001
3601	chr1	-	ENSG00000116560.6	protein_coding,	protein_coding	37.9742	30.5249	3728	35648533	35658749	10217	protein_coding	KNOWN	SFPQ	protein_coding	SFPQ-001	35658749	1	1258	34.24955	1258	1	0	NA	NA	NA	NA	NA	NA	NA	NA	NA	NA	0	NA	NA	NA	NA	NA	NA	NA	NA	NA	NA	0.471705659	1256	5.09801312771868	-2.10469115120167	7.69054006604355
3625	chr1	-	ENSG00000142687.11	processed_transcript,	protein_coding	18.1916	26.5046	3753	36022072	36022989	918	protein_coding	KNOWN	KIAA0319L	processed_transcript	KIAA0319L-004	36022989	1	1270	22.3481	1270	1	5	-83|-134.5|-518.5|-1667.5|-1894	4|4|4|4|5	0.111111111111111|0.111111111111111|0.185185185185185|0.0476190476190476|0.107142857142857	0.0555555555555556|0.111111111111111|0.148148148148148|0.0476190476190476|0.0357142857142857	0|0.0740740740740741|0.037037037037037|0.0952380952380952|0.178571428571429	18|27|27|21|28	NA|NA|NA|NA|NA	NA|NA|NA|NA|NA	NA|NA|NA|NA|NA	-|+|-|-|+	1	237.5	5	0.172413793	0.172413793	0.034482759	29	NA	NA	NA	-	0.590281944	1268	4.48208027586655	-1.67299791384905	6.6075789710029
3630	chr1	+	ENSG00000020129.10	protein_coding,	protein_coding	0.0530366	0.148902	3758	36023074	36032373	9300	protein_coding	KNOWN	NCDN	protein_coding	NCDN-002	36023074	1	1271	0.1009693	1271	1	2	-322.5|-2	5|4	0.172413793103448|0.111111111111111	0.172413793103448|0.0555555555555556	0.0344827586206897|0	29|18	NA|NA	NA|NA	NA|NA	-|-	4	49.5|433.5|1582.5|1809	4|4|4|5	0.111111111111111|0.185185185185185|0.0476190476190476|0.107142857142857	0.111111111111111|0.148148148148148|0.0476190476190476|0.0357142857142857	0.0740740740740741|0.037037037037037|0.0952380952380952|0.178571428571429	27|27|21|28	NA|NA|NA|NA	NA|NA|NA|NA	NA|NA|NA|NA	+|-|-|+	0.443711258	1269	-3.30801139072648	-1.65380449140698	5.51479164117364
3633	chr1	-	ENSG00000142687.11	protein_coding,	protein_coding	4.18989	3.62328	3761	35900566	36023256	122691	protein_coding	KNOWN	KIAA0319L	protein_coding	KIAA0319L-003	36023256	1	1272	3.906585	1272	1	3	-251.5|-1400.5|-1627	4|4|5	0.185185185185185|0.0476190476190476|0.107142857142857	0.148148148148148|0.0476190476190476|0.0357142857142857	0.037037037037037|0.0952380952380952|0.178571428571429	27|21|28	NA|NA|NA	NA|NA|NA	NA|NA|NA	-|-|+	3	504.5|184|132.5	5|4|4	0.172413793103448|0.111111111111111|0.111111111111111	0.172413793103448|0.0555555555555556|0.111111111111111	0.0344827586206897|0|0.0740740740740741	29|18|27	NA|NA|NA	NA|NA|NA	NA|NA|NA	-|-|+	0.587282543	1270	1.96590800488375	-1.23820069244062	6.59905601670443
3635	chr1	+	ENSG00000020129.10	protein_coding,	protein_coding	3.92471	3.97072	3763	36023409	36032374	8966	protein_coding	KNOWN	NCDN	protein_coding	NCDN-003	36023409	1	1273	3.947715	1273	1	3	-657.5|-337|-285.5	5|4|4	0.172413793103448|0.111111111111111|0.111111111111111	0.172413793103448|0.0555555555555556|0.111111111111111	0.0344827586206897|0|0.0740740740740741	29|18|27	NA|NA|NA	NA|NA|NA	NA|NA|NA	-|-|+	3	98.5|1247.5|1474	4|4|5	0.185185185185185|0.0476190476190476|0.107142857142857	0.148148148148148|0.0476190476190476|0.0357142857142857	0.037037037037037|0.0952380952380952|0.178571428571429	27|21|28	NA|NA|NA	NA|NA|NA	NA|NA|NA	-|-|+	0.460507898	1271	1.98101784011646	-1.41080793493429	5.61009789519813
3637	chr1	-	ENSG00000142687.11	nonsense_mediated_decay,	protein_coding	0.0530366	0	3765	35925975	36023551	97577	protein_coding	KNOWN	KIAA0319L	nonsense_mediated_decay	KIAA0319L-015	36023551	1	1274	0.0265183	1274	1	2	-1105.5|-1332	4|5	0.0476190476190476|0.107142857142857	0.0476190476190476|0.0357142857142857	0.0952380952380952|0.178571428571429	21|28	NA|NA	NA|NA	NA|NA	-|+	4	799.5|479|427.5|43.5	5|4|4|4	0.172413793103448|0.111111111111111|0.111111111111111|0.185185185185185	0.172413793103448|0.0555555555555556|0.111111111111111|0.148148148148148	0.0344827586206897|0|0.0740740740740741|0.037037037037037	29|18|27|27	NA|NA|NA|NA	NA|NA|NA|NA	NA|NA|NA|NA	-|-|+|-	0.572885423	1272	-5.23686789773981	-4.21622321207524	5.91141376432629
3652	chr1	-	ENSG00000092853.8	protein_coding,protein_coding,protein_coding,	protein_coding	1.64414	1.04231	3781	36202006	36235529	33524	protein_coding	KNOWN	CLSPN	protein_coding	CLSPN-005	36235529	1	1283	4.029675	1283	1	0	NA	NA	NA	NA	NA	NA	NA	NA	NA	NA	0	NA	NA	NA	NA	NA	NA	NA	NA	NA	NA	0.453109378	1281	2.01066348768734	-0.891104897062788	5.63548765390291
3658	chr1	+	ENSG00000092847.5	protein_coding,	protein_coding	0.0530366	0	3787	36335409	36386559	51151	protein_coding	KNOWN	EIF2C1	protein_coding	EIF2C1-001	36335409	1	1285	0.0265183	1285	1	0	NA	NA	NA	NA	NA	NA	NA	NA	NA	NA	0	NA	NA	NA	NA	NA	NA	NA	NA	NA	NA	0.449910018	1283	-5.23686789773981	-4.66562388534723	2.23897202571219
3664	chr1	+	ENSG00000126070.12	protein_coding,	protein_coding	2.01539	1.14158	3793	36396859	36522063	125205	protein_coding	KNOWN	EIF2C3	protein_coding	EIF2C3-002	36396859	1	1288	1.578485	1288	1	1	-952	4	0.181818182	0.045454545	0.090909091	22	NA	NA	NA	+	2	257|355	4|5	0.136363636363636|0.0588235294117647	0.181818181818182|0.264705882352941	0|0.0882352941176471	22|34	2|NA	1|NA	7|NA	-|-	0.458508298	1286	0.658540551098516	-2.22836110684081	6.69919636587682
3683	chr1	-	ENSG00000054116.7	processed_transcript,protein_coding,	protein_coding	17.1308	12.9048	3813	36603497	36615097	11601	protein_coding	KNOWN	TRAPPC3	protein_coding	TRAPPC3-003	36615097	1	1294	30.0356	1294	1	2	-1138|-1266.5	4|5	0.166666666666667|0.161290322580645	0.166666666666667|0.193548387096774	0.0833333333333333|0.0645161290322581	24|31	NA|NA	NA|NA	NA|NA	-|+	1	897	4	0.1	0.05	0	20	NA	NA	NA	+	0.534693061	1292	4.90860157874104	-1.48115867114161	6.65190712055591
3720	chr1	-	ENSG00000196182.6	protein_coding,	protein_coding	17.5021	18.6624	3850	36805225	36851485	46261	protein_coding	KNOWN	STK40	protein_coding	STK40-001	36851485	1	1303	18.08225	1303	1	1	-88.5	4	0	0.217391304	0	23	NA	NA	NA	-	2	1946|202.5	4|6	0.05|0.0540540540540541	0.05|0.135135135135135	0.1|0.108108108108108	20|37	NA|NA	NA|NA	NA|NA	-|-	0.49890022	1301	4.17650230039917	-1.46673175281824	6.4797092740164
3724	chr1	-	ENSG00000181817.5	processed_transcript,	protein_coding	23.124	30.9716	3854	36856839	36863488	6650	protein_coding	KNOWN	LSM10	processed_transcript	LSM10-003	36863488	1	1304	27.0478	1304	1	0	NA	NA	NA	NA	NA	NA	NA	NA	NA	NA	0	NA	NA	NA	NA	NA	NA	NA	NA	NA	NA	0.520495901	1302	4.75743934852666	-2.06672346275465	7.51726630097836
3735	chr1	-	ENSG00000116885.14	protein_coding,	protein_coding	0.424293	0.297804	3867	36883511	36916034	32524	protein_coding	KNOWN	OSCP1	protein_coding	OSCP1-010	36916034	1	1307	0.3610485	1307	1	1	-227.5	5	0.074074074	0.222222222	0.037037037	27	NA	NA	NA	+	0	NA	NA	NA	NA	NA	NA	NA	NA	NA	NA	0.49110178	1305	-1.46973544611382	-1.24365638842717	4.53465978556495
3741	chr1	-	ENSG00000116898.7	processed_transcript,	protein_coding	59.4541	56.831	3873	36921375	36929946	8572	protein_coding	KNOWN	MRPS15	processed_transcript	MRPS15-002	36929946	1	1308	58.14255	1308	1	1	-332.5	6	0.12195122	0	0.170731707	41	NA	NA	NA	-	2	723|230	4|4	0.192307692307692|0.230769230769231	0.0769230769230769|0.153846153846154	0.0769230769230769|0.0384615384615385	26|26	NA|5	NA|4	NA|5	-|-	0.526894621	1306	5.8615224410722	-1.78338503156561	7.3345361633982
3777	chr1	-	ENSG00000163875.11	protein_coding,protein_coding,	protein_coding	31.2916	34.0489	3910	37959363	37980364	21002	protein_coding	KNOWN	MEAF6	protein_coding	MEAF6-008	37980364	1	1319	65.3405	1319	1	0	NA	NA	NA	NA	NA	NA	NA	NA	NA	NA	1	326	4	0.136363636	0.090909091	0	22	NA	NA	NA	-	0.50489902	1317	6.02990558952805	-1.77793247422361	6.08844714169673
3781	chr1	-	ENSG00000163877.7	processed_transcript,	protein_coding	7.74335	6.79986	3914	38018088	38019891	1804	protein_coding	KNOWN	SNIP1	processed_transcript	SNIP1-002	38019891	1	1321	7.271605	1321	1	0	NA	NA	NA	NA	NA	NA	NA	NA	NA	NA	0	NA	NA	NA	NA	NA	NA	NA	NA	NA	NA	0.49330134	1319	2.86227383319282	-1.93015486257129	7.5070049507517
3801	chr1	-	ENSG00000134697.6	processed_transcript,	protein_coding	18.2976	15.734	3934	38047826	38061528	13703	protein_coding	KNOWN	GNL2	processed_transcript	GNL2-007	38061528	1	1324	17.0158	1324	1	0	NA	NA	NA	NA	NA	NA	NA	NA	NA	NA	0	NA	NA	NA	NA	NA	NA	NA	NA	NA	NA	0.455708858	1322	4.08880307627556	-1.28630067483756	7.31656219460757
3813	chr1	-	ENSG00000116922.9	protein_coding,processed_transcript,	protein_coding	3.28827	5.01304	3946	38147242	38156192	8951	protein_coding	KNOWN	C1orf109	protein_coding	C1orf109-001	38156192	1	1326	8.30131	1326	1	2	-411|-1783.5	4|6	0.142857142857143|0.0571428571428571	0.142857142857143|0.114285714285714	0.178571428571429|0.114285714285714	28|35	NA|NA	NA|NA	NA|NA	+|+	1	571.5	4	0.12	0.12	0.12	25	7	4	1	+	0.525894821	1324	3.05333902096247	-2.24331142516619	6.20392952490906
3819	chr1	+	ENSG00000134690.6	protein_coding,	protein_coding	8.16764	4.06999	3952	38158153	38175385	17233	protein_coding	KNOWN	CDCA8	protein_coding	CDCA8-002	38158153	1	1327	6.118815	1327	1	2	-1550|-177.5	4|6	0.142857142857143|0.0571428571428571	0.142857142857143|0.114285714285714	0.178571428571429|0.114285714285714	28|35	NA|NA	NA|NA	NA|NA	+|+	2	139.5|749	4|4	0.185185185185185|0	0.111111111111111|0.1	0.037037037037037|0.1	27|30	2|NA	7|NA	5|NA	-|+	0.537092581	1325	2.61325228050666	-1.88416230869233	6.97890039890058
3830	chr1	+	ENSG00000185090.10	protein_coding,	protein_coding	0.901623	1.09195	3966	38259474	38266805	7332	protein_coding	KNOWN	MANEAL	protein_coding	MANEAL-002	38259474	1	1334	0.9967865	1334	1	2	-172|-26	8|4	0.116666666666667|0.03125	0.166666666666667|0.125	0.1|0	60|32	NA|NA	NA|NA	NA|NA	+|-	1	956	5	0.052631579	0.184210526	0.078947368	38	NA	NA	NA	-	0.483103379	1332	-0.0046435655653159	-2.34592384973573	5.3471981691812
3837	chr1	+	ENSG00000197982.10	protein_coding,	protein_coding	2.91702	2.38243	3974	38273419	38275121	1703	protein_coding	KNOWN	C1orf122	protein_coding	C1orf122-003	38273419	1	1336	2.649725	1336	1	0	NA	NA	NA	NA	NA	NA	NA	NA	NA	NA	3	707|818.5|1012	5|4|5	0.131578947368421|0.0740740740740741|0	0.131578947368421|0.185185185185185|0.0833333333333333	0.0526315789473684|0.0740740740740741|0.166666666666667	38|27|24	NA|NA|NA	NA|NA|NA	NA|NA|NA	+|+|+	0.465306939	1334	1.40584263827082	-2.04751136991721	5.3987473765296
3859	chr1	-	ENSG00000204084.6	protein_coding,processed_transcript,	protein_coding	3.55346	5.41011	3996	38327757	38412723	84967	protein_coding	KNOWN	INPP5B	protein_coding	INPP5B-001	38412723	1	1347	8.96357	1347	1	2	-171|-561	4|4	0.136363636363636|0.1	0.0454545454545455|0.1	0.136363636363636|0.15	22|20	NA|NA	NA|NA	NA|NA	-|-	4	1133.5|635|203|125.5	6|4|4|5	0.2|0.125|0.0769230769230769|0.148148148148148	0.111111111111111|0.0416666666666667|0.153846153846154|0.111111111111111	0.0666666666666667|0.0833333333333333|0.115384615384615|0.0740740740740741	45|24|26|27	NA|NA|NA|NA	NA|NA|NA|NA	NA|NA|NA|NA	-|+|-|-	0.541091782	1345	3.16407344160296	-1.88842912119152	5.82653849835365
3867	chr1	-	ENSG00000183431.7	processed_transcript,	protein_coding	62.1589	38.8634	4004	38445063	38455667	10605	protein_coding	KNOWN	SF3A3	processed_transcript	SF3A3-005	38455667	1	1348	50.51115	1348	1	0	NA	NA	NA	NA	NA	NA	NA	NA	NA	NA	0	NA	NA	NA	NA	NA	NA	NA	NA	NA	NA	0.461707658	1346	5.65852998322964	-2.13035916809784	7.07730720016288
3877	chr1	+	ENSG00000183520.7	protein_coding,	protein_coding	97.004	77.2802	4014	38478414	38490496	12083	protein_coding	KNOWN	UTP11L	protein_coding	UTP11L-001	38478414	1	1351	87.1421	1351	1	0	NA	NA	NA	NA	NA	NA	NA	NA	NA	NA	0	NA	NA	NA	NA	NA	NA	NA	NA	NA	NA	0.485102979	1349	6.44529797544685	-2.05169219676896	7.67549138519609
3927	chr1	+	ENSG00000127603.15	processed_transcript,	protein_coding	0.15911	0.148902	4065	39680934	39726212	45279	protein_coding	KNOWN	MACF1	processed_transcript	MACF1-014	39680934	1	1379	0.154006	1379	1	0	NA	NA	NA	NA	NA	NA	NA	NA	NA	NA	2	551|1615	4|4	0.136363636363636|0.166666666666667	0|0	0.0909090909090909|0.233333333333333	22|30	NA|NA	NA|NA	NA|NA	+|-	0.446310738	1376	-2.69894153616444	-4.46431327317396	4.82287328298113
3934	chr1	+	ENSG00000127603.15	retained_intron,	protein_coding	0.424293	0.297804	4072	39749763	39751002	1240	protein_coding	KNOWN	MACF1	retained_intron	MACF1-018	39749763	1	1381	0.3610485	1381	1	0	NA	NA	NA	NA	NA	NA	NA	NA	NA	NA	0	NA	NA	NA	NA	NA	NA	NA	NA	NA	NA	0.391521696	1378	-1.46973544611382	-4.97025446858495	2.38983898561063
3955	chr1	+	ENSG00000237624.1	unprocessed_pseudogene,	pseudogene	0	0.099268	4096	39980628	39982162	1535	pseudogene	KNOWN	OXCT2P1	unprocessed_pseudogene	OXCT2P1-001	39980628	1	1390	0.049634	1390	1	1	-338.5	4	0.137931034	0.103448276	0.103448276	29	NA	NA	NA	+	0	NA	NA	NA	NA	NA	NA	NA	NA	NA	NA	0.594881024	1387	-4.33252746377914	-3.07824680955191	3.78584429152691
3973	chr1	-	ENSG00000201457.1	snoRNA,	snoRNA	0.0530366	0.049634	4116	40033046	40033180	135	snoRNA	KNOWN	SNORA55	snoRNA	SNORA55-201	40033180	1	1396	0.0513353	1396	1	0	NA	NA	NA	NA	NA	NA	NA	NA	NA	NA	0	NA	NA	NA	NA	NA	NA	NA	NA	NA	NA	0.442711458	1393	-4.28390497366436	-5.17391810033832	3.86611750544431
4003	chr1	+	ENSG00000084072.12	protein_coding,protein_coding,protein_coding,protein_coding,	protein_coding	12.8349	14.5924	4147	40204573	40229586	25014	protein_coding	KNOWN	PPIE	protein_coding	PPIE-003	40204573	1	1406	54.8546	1406	1	2	-1069.5|-61.5	4|4	0.111111111111111|0.0869565217391304	0.111111111111111|0.130434782608696	0.185185185185185|0.0434782608695652	27|23	NA|NA	NA|NA	NA|NA	-|+	2	89|1755.5	4|4	0|0.0476190476190476	0.1|0.0476190476190476	0.15|0.0952380952380952	20|21	NA|1	NA|3	NA|1	+|+	0.481303739	1403	5.77754070218716	-2.84891009553381	6.19262833883096
4052	chr1	+	ENSG00000131236.10	protein_coding,protein_coding,	protein_coding	79.4489	89.9369	4199	40506424	40537280	30857	protein_coding	KNOWN	CAP1	protein_coding	CAP1-006	40506424	1	1419	169.3858	1419	1	2	-629.5|-298	5|4	0.0810810810810811|0.0357142857142857	0.162162162162162|0.321428571428571	0.108108108108108|0.107142857142857	37|28	NA|NA	NA|NA	NA|NA	-|+	0	NA	NA	NA	NA	NA	NA	NA	NA	NA	NA	0.4875025	1416	7.40416912508083	-1.68918996032211	7.05817802611075
4069	chr1	-	ENSG00000131238.9	nonsense_mediated_decay,protein_coding,protein_coding,	protein_coding	160.33	140.464	4217	40544232	40562924	18693	protein_coding	KNOWN	PPT1	protein_coding	PPT1-002	40562924	1	1420	451.191	1420	1	0	NA	NA	NA	NA	NA	NA	NA	NA	NA	NA	0	NA	NA	NA	NA	NA	NA	NA	NA	NA	NA	0.420515897	1417	8.8175944800627	-2.34299300184282	5.49260976407311
4073	chr1	+	ENSG00000117000.6	protein_coding,	protein_coding	5.19759	5.90645	4221	40627045	40706593	79549	protein_coding	KNOWN	RLF	protein_coding	RLF-001	40627045	1	1422	5.55202	1422	1	1	-33	4	0.083333333	0.25	0	24	NA	NA	NA	+	1	299.5	4	0.12	0.16	0.04	25	NA	NA	NA	+	0.423315337	1419	2.47301276493506	-2.24126357210628	7.28353671312418
4087	chr1	-	ENSG00000049089.9	retained_intron,	protein_coding	7.79639	8.63632	4235	40773375	40781110	7736	protein_coding	KNOWN	COL9A2	retained_intron	COL9A2-009	40781110	1	1430	8.216355	1430	1	4	-195.5|-1222.5|-1257.5|-1859	5|5|4|4	0.0769230769230769|0.0303030303030303|0.16|0.0555555555555556	0.41025641025641|0.272727272727273|0.12|0.111111111111111	0.0256410256410256|0.0606060606060606|0.08|0.111111111111111	39|33|25|18	NA|NA|6|2	NA|NA|5|1	NA|NA|2|2	-|-|+|+	3	1603|1260|1213	4|4|4	0.0833333333333333|0.111111111111111|0.2	0.0833333333333333|0.0555555555555556|0.266666666666667	0.166666666666667|0.111111111111111|0.0333333333333333	24|18|30	NA|NA|6	NA|NA|6	NA|NA|6	+|-|-	0.560487902	1427	3.03849851681617	-2.20822093827373	6.07716624828179
4099	chr1	+	ENSG00000084070.6	protein_coding,	protein_coding	35.5876	32.957	4247	40839369	40888998	49630	protein_coding	KNOWN	SMAP2	protein_coding	SMAP2-001	40839369	1	1434	34.2723	1434	1	2	-1382.5|-121	4|7	0.161290322580645|0.075	0.0645161290322581|0.1	0.193548387096774|0.1	31|40	NA|NA	NA|NA	NA|NA	+|-	0	NA	NA	NA	NA	NA	NA	NA	NA	NA	NA	0.422115577	1431	5.09897110866596	-1.02737794502169	6.48487295002686
4104	chr1	+	ENSG00000187801.9	protein_coding,protein_coding,protein_coding,	protein_coding	7.31906	7.24657	4252	40915779	40929352	13574	protein_coding	KNOWN	ZNF643	protein_coding	ZNF643-201	40915779	1	1435	21.848445	1435	1	0	NA	NA	NA	NA	NA	NA	NA	NA	NA	NA	1	100	4	0.076923077	0.192307692	0.115384615	26	NA	NA	NA	+	0.405318936	1432	4.44945869861232	-1.32264600127674	6.39974545013646
4123	chr1	+	ENSG00000117010.11	protein_coding,protein_coding,	protein_coding	5.30366	3.97072	4271	40997335	41010709	13375	protein_coding	KNOWN	ZNF684	protein_coding	ZNF684-004	40997335	1	1441	9.27438	1441	1	0	NA	NA	NA	NA	NA	NA	NA	NA	NA	NA	0	NA	NA	NA	NA	NA	NA	NA	NA	NA	NA	0.395120976	1438	3.21325083959622	-2.00403939846582	6.70788928563241
4130	chr1	-	ENSG00000117016.5	protein_coding,	protein_coding	0.848586	1.43939	4278	41086351	41131329	44979	protein_coding	KNOWN	RIMS3	protein_coding	RIMS3-001	41131329	1	1445	1.143988	1445	1	3	-56|-132.5|-361	6|4|4	0.0869565217391304|0.12|0.15	0.217391304347826|0.2|0.15	0.0217391304347826|0.08|0	46|25|20	NA|NA|2	NA|NA|2	NA|NA|2	+|+|-	5	1416.5|769|428|173.5|93.5	6|5|5|4|4	0.0769230769230769|0.15625|0.176470588235294|0|0.0869565217391304	0.0769230769230769|0.0625|0.0882352941176471|0.24|0.130434782608696	0.179487179487179|0.15625|0.147058823529412|0.12|0	39|32|34|25|23	NA|NA|NA|NA|NA	NA|NA|NA|NA|NA	NA|NA|NA|NA|NA	-|-|-|-|+	0.486102779	1442	0.194071918872168	-1.41080793493429	4.15435703756125
4145	chr1	+	ENSG00000066136.13	protein_coding,	protein_coding	7.79639	8.63632	4293	41175029	41237275	62247	protein_coding	KNOWN	NFYC	protein_coding	NFYC-004	41175029	1	1449	8.216355	1449	1	0	NA	NA	NA	NA	NA	NA	NA	NA	NA	NA	0	NA	NA	NA	NA	NA	NA	NA	NA	NA	NA	0.421515697	1446	3.03849851681617	-4.04689718707806	6.87717500717068
4163	chr1	-	ENSG00000228940.1	processed_pseudogene,	pseudogene	0.0530366	0	4313	41403776	41405435	1660	pseudogene	KNOWN	RP11-348A7.1	processed_pseudogene	RP11-348A7.1-001	41405435	1	1456	0.0265183	1456	1	0	NA	NA	NA	NA	NA	NA	NA	NA	NA	NA	0	NA	NA	NA	NA	NA	NA	NA	NA	NA	NA	0.441511698	1453	-5.23686789773981	-3.12782842428902	3.79933685264698
4187	chr1	-	ENSG00000010803.12	processed_transcript,	protein_coding	0.31822	0.24817	4337	41503034	41514432	11399	protein_coding	KNOWN	SCMH1	processed_transcript	SCMH1-007	41514432	1	1460	0.283195	1460	1	0	NA	NA	NA	NA	NA	NA	NA	NA	NA	NA	0	NA	NA	NA	NA	NA	NA	NA	NA	NA	NA	0.426114777	1457	-1.82013230100206	-5.49323148940985	2.21185131639201
4237	chr1	-	ENSG00000066185.8	protein_coding,protein_coding,	protein_coding	0.0530366	0.049634	4388	42896000	42921938	25939	protein_coding	KNOWN	ZMYND12	protein_coding	ZMYND12-001	42921938	1	1484	0.1026706	1484	1	1	-580	4	0.153846154	0.076923077	0.115384615	26	1	7	4	-	1	426.5	4	0.333333333	0	0	21	3	5	1	+	0.449910018	1481	-3.28390497366436	-2.42506731575728	5.89764723303923
4239	chr1	+	ENSG00000127125.6	protein_coding,	protein_coding	13.6835	12.7063	4390	42922210	42923175	966	protein_coding	KNOWN	PPCS	protein_coding	PPCS-005	42922210	1	1485	13.1949	1485	1	1	-698.5	4	0.333333333	0	0	21	3	5	1	+	1	308	4	0.153846154	0.076923077	0.115384615	26	1	7	4	-	0.442511498	1482	3.72190851186069	-1.82061119557303	7.15955260857924
4267	chr1	+	ENSG00000171960.6	protein_coding,	protein_coding	37.7621	25.8097	4418	43124096	43142429	18334	protein_coding	KNOWN	PPIH	protein_coding	PPIH-001	43124096	1	1494	31.7859	1494	1	1	-858.5	4	0.03030303	0.03030303	0.272727273	33	NA	NA	NA	-	0	NA	NA	NA	NA	NA	NA	NA	NA	NA	NA	0.425714857	1491	4.99031503300098	-2.46672776289363	6.27909254378596
4274	chr1	+	ENSG00000065978.12	protein_coding,	protein_coding	3.39435	1.34012	4426	43148098	43168020	19923	protein_coding	KNOWN	YBX1	protein_coding	YBX1-001	43148098	1	1496	2.367235	1496	1	0	NA	NA	NA	NA	NA	NA	NA	NA	NA	NA	4	182|329.5|440.5|771.5	4|4|4|4	0|0.0434782608695652|0.137931034482759|0.0645161290322581	0.178571428571429|0.217391304347826|0.0344827586206897|0.32258064516129	0|0.0869565217391304|0.0689655172413793|0.032258064516129	28|23|29|31	NA|NA|NA|NA	NA|NA|NA|NA	NA|NA|NA|NA	-|+|-|-	0.465906819	1493	1.24320293231072	-2.12909640180416	5.05260750959863
4279	chr1	-	ENSG00000164007.6	protein_coding,protein_coding,	protein_coding	3.50042	2.28317	4432	43198764	43205925	7162	protein_coding	KNOWN	CLDN19	protein_coding	CLDN19-001	43205925	1	1497	5.78359	1497	1	3	-164.5|-482|-1019	4|5|6	0.263157894736842|0.147058823529412|0.05	0|0.0882352941176471|0.1	0.0526315789473684|0.205882352941176|0.125	19|34|40	3|NA|NA	2|NA|NA	1|NA|NA	+|+|-	3	1630|599|447.5	4|4|5	0.0416666666666667|0.15|0.212121212121212	0.0833333333333333|0.1|0.0606060606060606	0.166666666666667|0.1|0.0909090909090909	24|20|33	NA|NA|NA	NA|NA|NA	NA|NA|NA	+|-|-	0.548690262	1494	2.53196528293699	-1.56148989980345	5.18308980753481
4292	chr1	-	ENSG00000117385.10	retained_intron,	protein_coding	125.803	107.358	4446	43212046	43232693	20648	protein_coding	KNOWN	LEPRE1	retained_intron	LEPRE1-004	43232693	1	1500	116.5805	1500	1	0	NA	NA	NA	NA	NA	NA	NA	NA	NA	NA	1	327	4	0.076923077	0.230769231	0.076923077	26	NA	NA	NA	+	0.449910018	1497	6.86518268409374	-1.13955039448116	7.45054824017271
4295	chr1	+	ENSG00000164008.7	protein_coding,	protein_coding	6.25832	5.21157	4449	43232940	43241412	8473	protein_coding	KNOWN	C1orf50	protein_coding	C1orf50-001	43232940	1	1501	5.734945	1501	1	1	-574	4	0.076923077	0.230769231	0.076923077	26	NA	NA	NA	+	0	NA	NA	NA	NA	NA	NA	NA	NA	NA	NA	0.50909818	1498	2.51977965038971	-1.43167207780396	7.29363175804764
4303	chr1	+	ENSG00000164010.9	processed_transcript,	protein_coding	2.22754	2.08463	4459	43282795	43310654	27860	protein_coding	KNOWN	ERMAP	processed_transcript	ERMAP-004	43282795	1	1504	2.156085	1504	1	2	-1895|-52.5	4|9	0.0909090909090909|0	0|0.215686274509804	0.0454545454545455|0.0392156862745098	22|51	NA|NA	NA|NA	NA|NA	+|-	0	NA	NA	NA	NA	NA	NA	NA	NA	NA	NA	0.421715657	1501	1.10841405502048	-1.60208313991651	5.63000954291795
4310	chr1	-	ENSG00000241784.1	processed_transcript,	processed_transcript	0.848586	1.04231	4466	43302603	43312033	9431	processed_transcript	NOVEL	RP11-342M1.2	processed_transcript	RP11-342M1.2-001	43312033	1	1507	0.945448	1507	1	3	-466|-505.5|-1909	4|4|5	0.0909090909090909|0.0952380952380952|0.142857142857143	0.227272727272727|0.0952380952380952|0.0714285714285714	0|0.142857142857143|0.0714285714285714	22|21|28	NA|NA|NA	NA|NA|NA	NA|NA|NA	-|-|+	0	NA	NA	NA	NA	NA	NA	NA	NA	NA	NA	0.462107578	1504	-0.0809299833068857	-1.76561646604073	5.54754880668075
4311	chr1	-	ENSG00000228192.2	processed_transcript,processed_transcript,	processed_transcript	5.99314	5.06267	4467	43307569	43312058	4490	processed_transcript	NOVEL	RP11-342M1.3	processed_transcript	RP11-342M1.3-002	43312058	1	1508	11.05581	1508	1	3	-441|-480.5|-1884	4|4|5	0.0909090909090909|0.0952380952380952|0.142857142857143	0.227272727272727|0.0952380952380952|0.0714285714285714	0|0.142857142857143|0.0714285714285714	22|21|28	NA|NA|NA	NA|NA|NA	NA|NA|NA	-|-|+	0	NA	NA	NA	NA	NA	NA	NA	NA	NA	NA	0.461707658	1505	3.46673282245436	-1.6025212561898	5.63894292703336
4312	chr1	-	ENSG00000243153.1	processed_transcript,	processed_transcript	6.04618	5.06267	4468	43300352	43312093	11742	processed_transcript	NOVEL	RP11-342M1.4	processed_transcript	RP11-342M1.4-001	43312093	1	1509	5.554425	1509	1	3	-406|-445.5|-1849	4|4|5	0.0909090909090909|0.0952380952380952|0.142857142857143	0.227272727272727|0.0952380952380952|0.0714285714285714	0|0.142857142857143|0.0714285714285714	22|21|28	NA|NA|NA	NA|NA|NA	NA|NA|NA	-|-|+	0	NA	NA	NA	NA	NA	NA	NA	NA	NA	NA	0.463307339	1506	2.47363757001491	-1.43869438488938	5.81119378694487
4313	chr1	+	ENSG00000164011.12	protein_coding,	protein_coding	4.66722	5.36047	4469	43312280	43318148	5869	protein_coding	KNOWN	ZNF691	protein_coding	ZNF691-001	43312280	1	1510	5.013845	1510	1	0	NA	NA	NA	NA	NA	NA	NA	NA	NA	NA	3	219|258.5|1662	4|4|5	0.0909090909090909|0.0952380952380952|0.142857142857143	0.227272727272727|0.0952380952380952|0.0714285714285714	0|0.142857142857143|0.0714285714285714	22|21|28	NA|NA|NA	NA|NA|NA	NA|NA|NA	-|-|+	0.430313937	1507	2.3259173968125	-1.37669119325256	6.91435413747653
4379	chr1	+	ENSG00000117399.8	protein_coding,	protein_coding	24.556	20.4492	4536	43824626	43828874	4249	protein_coding	KNOWN	CDC20	protein_coding	CDC20-001	43824626	1	1532	22.5026	1532	1	1	-225	7	0.088235294	0.176470588	0.029411765	34	NA	NA	NA	-	0	NA	NA	NA	NA	NA	NA	NA	NA	NA	NA	0.472305539	1529	4.49201979812515	-2.07278011251443	6.29148580781956
4402	chr1	-	ENSG00000159479.12	protein_coding,protein_coding,	protein_coding	59.5071	49.7829	4559	43849588	43855479	5892	protein_coding	KNOWN	MED8	protein_coding	MED8-002	43855479	1	1535	109.29	1535	1	0	NA	NA	NA	NA	NA	NA	NA	NA	NA	NA	1	1535.5	3	0.052631579	0.052631579	0.210526316	19	NA	NA	NA	-	0.444511098	1532	6.77201759068921	-1.09788469380425	7.4683357726957
4427	chr1	+	ENSG00000142949.11	protein_coding,	protein_coding	7.05387	9.57937	4586	43996547	44089337	92791	protein_coding	KNOWN	PTPRF	protein_coding	PTPRF-001	43996547	1	1542	8.31662	1542	1	0	NA	NA	NA	NA	NA	NA	NA	NA	NA	NA	6	244|318|527|831.5|965|1525	6|3|3|4|6|4	0.113636363636364|0.0769230769230769|0|0.173913043478261|0.147058823529412|0.136363636363636	0.113636363636364|0.192307692307692|0.0625|0.130434782608696|0.205882352941176|0.272727272727273	0.0454545454545455|0.0384615384615385|0.0625|0.0434782608695652|0|0	44|26|16|23|34|22	NA|NA|NA|NA|NA|5	NA|NA|NA|NA|NA|2	NA|NA|NA|NA|NA|2	-|+|-|+|-|+	0.50689862	1539	3.05599731442324	-1.72737482744531	5.00805692364612
4438	chr1	+	ENSG00000066135.7	protein_coding,	protein_coding	6.9478	9.23193	4600	44115805	44170411	54607	protein_coding	KNOWN	KDM4A	protein_coding	KDM4A-201	44115805	1	1543	8.089865	1543	1	0	NA	NA	NA	NA	NA	NA	NA	NA	NA	NA	3	197.5|327.5|497	4|4|4	0.0434782608695652|0.12|0.153846153846154	0.0434782608695652|0.12|0.115384615384615	0.0869565217391304|0.12|0.0769230769230769	23|25|26	NA|NA|2	NA|NA|3	NA|NA|7	+|+|+	0.473505299	1540	3.01611562781526	-1.37407119107463	4.53943228699976
4448	chr1	-	ENSG00000236200.1	processed_transcript,	processed_transcript	0.583403	0.74451	4610	44165594	44173012	7419	processed_transcript	NOVEL	RP11-184I16.2	processed_transcript	RP11-184I16.2-001	44173012	1	1546	0.6639565	1546	1	1	-450	4	0	0.25	0.1	20	4	2	1	+	1	289.5	4	0.103448276	0.172413793	0.103448276	29	NA	NA	NA	-	0.469306139	1543	-0.590839370318244	-1.13827965323016	6.66400499217361
4500	chr1	+	ENSG00000117410.8	protein_coding,	protein_coding	143.04	135.352	4663	44440620	44443961	3342	protein_coding	KNOWN	ATP6V0B	protein_coding	ATP6V0B-004	44440620	1	1560	139.196	1560	1	0	NA	NA	NA	NA	NA	NA	NA	NA	NA	NA	3	170.5|360.5|1246.5	4|5|4	0.037037037037037|0.0689655172413793|0.08	0.222222222222222|0.172413793103448|0.08	0.111111111111111|0.0689655172413793|0.12	27|29|25	7|NA|NA	7|NA|NA	1|NA|NA	+|+|+	0.552689462	1557	7.12097394361166	-1.63979983377414	6.85748850228821
4512	chr1	+	ENSG00000117411.12	processed_transcript,	protein_coding	15.3806	15.6347	4676	44444909	44447595	2687	protein_coding	KNOWN	B4GALT2	processed_transcript	B4GALT2-004	44444909	1	1561	15.50765	1561	1	0	NA	NA	NA	NA	NA	NA	NA	NA	NA	NA	3	61.5|177.5|576.5	5|5|4	0.0344827586206897|0.0571428571428571|0.12	0.241379310344828|0.228571428571429|0.04	0|0.0285714285714286|0.08	29|35|25	NA|NA|NA	NA|NA|NA	NA|NA|NA	-|+|-	0.581083783	1558	3.95490817454212	-2.28840998275075	5.57142223178189
4547	chr1	-	ENSG00000233514.1	processed_pseudogene,	pseudogene	1.64414	0.943046	4711	44587825	44588184	360	pseudogene	KNOWN	RP11-570P14.1	processed_pseudogene	RP11-570P14.1-001	44588184	1	1568	1.293593	1568	1	0	NA	NA	NA	NA	NA	NA	NA	NA	NA	NA	0	NA	NA	NA	NA	NA	NA	NA	NA	NA	NA	0.407718456	1565	0.371383777111743	-4.86560552767394	2.68921147209667
4557	chr1	+	ENSG00000178028.8	protein_coding,protein_coding,	protein_coding	12.4636	14.5924	4721	44679145	44680552	1408	protein_coding	KNOWN	DMAP1	protein_coding	DMAP1-007	44679145	1	1574	27.056	1574	1	0	NA	NA	NA	NA	NA	NA	NA	NA	NA	NA	1	562.5	6	0.255319149	0.085106383	0.106382979	47	NA	NA	NA	+	0.402119576	1571	4.7578766597479	-2.92247260785807	5.675206453884
4581	chr1	+	ENSG00000187147.9	protein_coding,	protein_coding	5.19759	4.8145	4746	44870866	45117395	246530	protein_coding	KNOWN	RNF220	protein_coding	RNF220-001	44870866	1	1580	5.006045	1580	1	0	NA	NA	NA	NA	NA	NA	NA	NA	NA	NA	4	1032.5|1198|1497|1896	6|4|5|4	0.128205128205128|0.0714285714285714|0|0.0454545454545455	0.0256410256410256|0.214285714285714|0.0357142857142857|0.181818181818182	0.128205128205128|0.25|0.142857142857143|0.136363636363636	39|28|28|22	NA|NA|NA|NA	NA|NA|NA|NA	NA|NA|NA|NA	+|+|-|+	0.386922615	1577	2.32367125966089	-3.33787108728705	5.13706114348203
4633	chr1	+	ENSG00000142945.8	protein_coding,	protein_coding	26.5714	18.5631	4798	45205534	45233436	27903	protein_coding	KNOWN	KIF2C	protein_coding	KIF2C-201	45205534	1	1589	22.56725	1589	1	2	-1797|-1062.5	5|2	0.25|0.0526315789473684	0.0625|0	0|0.0526315789473684	32|19	NA|NA	NA|NA	NA|NA	-|+	0	NA	NA	NA	NA	NA	NA	NA	NA	NA	NA	0.516896621	1586	4.49615872019234	-2.34079876300718	7.09816698796819
4643	chr1	+	ENSG00000142937.7	protein_coding,	protein_coding	19.7296	11.8625	4808	45241245	45244451	3207	protein_coding	KNOWN	RPS8	protein_coding	RPS8-003	45241245	1	1592	15.79605	1592	1	1	-1328	6	0.157894737	0	0.157894737	38	NA	NA	NA	+	1	220.5	5	0	0.322580645	0.129032258	31	NA	NA	NA	+	0.472305539	1589	3.98149193443778	-3.03858710081539	6.64175419284649
4647	chr1	+	ENSG00000200913.1	snoRNA,	snoRNA	0.106073	0.198536	4812	45242162	45242265	104	snoRNA	KNOWN	SNORD46	snoRNA	SNORD46-201	45242162	1	1594	0.1523045	1594	1	1	-696.5	5	0	0.322580645	0.129032258	31	NA	NA	NA	+	0	NA	NA	NA	NA	NA	NA	NA	NA	NA	NA	0.50029994	1591	-2.71496952645825	-4.76019625313442	6.36795125811638
4649	chr1	+	ENSG00000142937.7	processed_transcript,	protein_coding	0.265183	0.397072	4814	45243222	45244335	1114	protein_coding	KNOWN	RPS8	processed_transcript	RPS8-007	45243222	1	1595	0.3311275	1595	1	1	-1756.5	5	0	0.322580645	0.129032258	31	NA	NA	NA	+	0	NA	NA	NA	NA	NA	NA	NA	NA	NA	NA	0.50789842	1592	-1.59454126395879	-4.80789168021424	4.17111136066586
4650	chr1	+	ENSG00000202031.1	snoRNA,	snoRNA	1.16681	1.04231	4815	45243515	45243584	70	snoRNA	KNOWN	SNORD38A	snoRNA	SNORD38A-201	45243515	1	1596	1.10456	1596	1	0	NA	NA	NA	NA	NA	NA	NA	NA	NA	NA	0	NA	NA	NA	NA	NA	NA	NA	NA	NA	NA	0.515896821	1593	0.143471788409243	-5.14300312840878	3.75983845450712
4651	chr1	+	ENSG00000142937.7	processed_transcript,	protein_coding	0	0.148902	4816	45243575	45244411	837	protein_coding	KNOWN	RPS8	processed_transcript	RPS8-008	45243575	1	1597	0.074451	1597	1	0	NA	NA	NA	NA	NA	NA	NA	NA	NA	NA	0	NA	NA	NA	NA	NA	NA	NA	NA	NA	NA	0.516696661	1594	-3.74756496305799	-5.14810983796455	3.88639486201243
4665	chr1	+	ENSG00000222009.4	protein_coding,protein_coding,	protein_coding	0.742513	0.545974	4830	45274154	45279801	5648	protein_coding	KNOWN	BTBD19	protein_coding	BTBD19-201	45274154	1	1603	1.288487	1603	1	1	-1013.5	4	0.157894737	0.105263158	0.105263158	19	1	5	1	-	2	315|1973	4|4	0.107142857142857|0.0769230769230769	0.0714285714285714|0.0769230769230769	0.142857142857143|0.115384615384615	28|26	NA|3	NA|1	NA|6	-|+	0.605478904	1600	0.365677981411623	-2.72546043662583	8.2173354752276
4674	chr1	-	ENSG00000202444.1	snRNA,	snRNA	0.424293	0.049634	4839	45285555	45285669	115	snRNA	NOVEL	U5.11	snRNA	U5.11-201	45285669	1	1604	0.2369635	1604	1	0	NA	NA	NA	NA	NA	NA	NA	NA	NA	NA	0	NA	NA	NA	NA	NA	NA	NA	NA	NA	NA	0.537892422	1601	-2.07726324008588	-3.24603957301886	5.86598828600517
4683	chr1	-	ENSG00000070785.12	processed_transcript,processed_transcript,	protein_coding	15.5928	17.5704	4850	45424233	45452267	28035	protein_coding	KNOWN	EIF2B3	processed_transcript	EIF2B3-007	45452267	1	1610	33.1632	1610	1	1	-142	4	0.115384615	0.153846154	0	26	NA	NA	NA	+	0	NA	NA	NA	NA	NA	NA	NA	NA	NA	NA	0.464907019	1607	5.05151131768571	-1.39099776658537	6.26262124834028
4695	chr1	-	ENSG00000126107.9	protein_coding,	protein_coding	17.1839	17.6201	4862	45468212	45477001	8790	protein_coding	KNOWN	HECTD3	protein_coding	HECTD3-001	45477001	1	1613	17.402	1613	1	2	-1038|-1758	4|4	0.25|0.125	0|0.125	0.0833333333333333|0.0833333333333333	24|24	NA|NA	NA|NA	NA|NA	-|+	3	1785.5|1510|924.5	4|4|5	0.142857142857143|0.166666666666667|0.162162162162162	0.0952380952380952|0.1|0.135135135135135	0.0952380952380952|0.166666666666667|0.0810810810810811	21|30|37	7|NA|NA	1|NA|NA	1|NA|NA	-|+|-	0.50929814	1610	4.121181218448	-2.51291707223582	6.35188288012555
4729	chr1	+	ENSG00000132773.7	protein_coding,	protein_coding	0.0530366	0	4899	45805342	45809647	4306	protein_coding	KNOWN	TOE1	protein_coding	TOE1-001	45805342	1	1623	0.0265183	1623	1	0	NA	NA	NA	NA	NA	NA	NA	NA	NA	NA	2	117|217.5	4|6	0.15625|0.0512820512820513	0.09375|0.128205128205128	0.1875|0.205128205128205	32|39	NA|NA	NA|NA	NA|NA	-|-	0.453509298	1620	-5.23686789773981	-3.77593995111406	5.94293687225032
4758	chr1	+	ENSG00000132773.7	processed_transcript,	protein_coding	0.212147	0.049634	4928	45806968	45808531	1564	protein_coding	KNOWN	TOE1	processed_transcript	TOE1-005	45806968	1	1629	0.1308905	1629	1	2	-1509|-1408.5	4|6	0.15625|0.0512820512820513	0.09375|0.128205128205128	0.1875|0.205128205128205	32|39	NA|NA	NA|NA	NA|NA	-|-	0	NA	NA	NA	NA	NA	NA	NA	NA	NA	NA	0.49430114	1626	-2.93356770425242	-4.74077928372587	4.18675473066344
4766	chr1	-	ENSG00000070759.11	protein_coding,protein_coding,	protein_coding	4.82633	3.72255	4936	45809555	45956840	147286	protein_coding	KNOWN	TESK2	protein_coding	TESK2-201	45956840	1	1632	8.54888	1632	1	1	-63	4	0.15	0.05	0.1	20	1	5	1	-	1	440	5	0.113636364	0.227272727	0.113636364	44	NA	NA	NA	+	0.479904019	1629	3.09573542300597	-1.45957197675334	6.78756839690327
4785	chr1	+	ENSG00000117448.9	processed_transcript,	protein_coding	82.525	76.0393	4957	46016526	46034296	17771	protein_coding	KNOWN	AKR1A1	processed_transcript	AKR1A1-006	46016526	1	1639	79.28215	1639	1	1	-1281	5	0.236842105	0.052631579	0.105263158	38	NA	NA	NA	+	1	173.5	4	0.105263158	0.157894737	0	19	NA	NA	NA	-	0.485502899	1636	6.30892418143144	-2.47954458779718	7.06867519586994
4798	chr1	+	ENSG00000132780.11	nonsense_mediated_decay,protein_coding,protein_coding,protein_coding,nonsense_mediated_decay,nonsense_mediated_decay,nonsense_mediated_decay,protein_coding,	protein_coding	8.48586	6.40279	4970	46049717	46083916	34200	protein_coding	KNOWN	NASP	protein_coding	NASP-202	46049717	1	1640	59.5546	1640	1	0	NA	NA	NA	NA	NA	NA	NA	NA	NA	NA	1	635.5	4	0	0.105263158	0.105263158	19	NA	NA	NA	+	0.487302539	1637	5.89614104111082	-2.7417729738723	7.58336268665073
4821	chr1	-	ENSG00000225447.1	processed_pseudogene,	pseudogene	0	0.049634	4995	46111488	46111869	382	pseudogene	KNOWN	RPS15AP10	processed_pseudogene	RPS15AP10-001	46111869	1	1643	0.024817	1643	1	0	NA	NA	NA	NA	NA	NA	NA	NA	NA	NA	0	NA	NA	NA	NA	NA	NA	NA	NA	NA	NA	0.402519496	1640	-5.33252746377914	-5.15837780778787	3.08161369958326
4826	chr1	-	ENSG00000159592.6	protein_coding,	protein_coding	97.6935	101.7	5000	46092976	46152208	59233	protein_coding	KNOWN	GPBP1L1	protein_coding	GPBP1L1-001	46152208	1	1645	99.69675	1645	1	4	-71|-206|-420.5|-1800.5	4|4|4|4	0.125|0.0909090909090909|0.0526315789473684|0.238095238095238	0.0833333333333333|0.181818181818182|0.105263157894737|0.142857142857143	0.0833333333333333|0|0.105263157894737|0.0476190476190476	24|22|19|21	NA|NA|1|2	NA|NA|4|1	NA|NA|1|6	-|-|-|+	0	NA	NA	NA	NA	NA	NA	NA	NA	NA	NA	0.49630074	1642	6.63947457006945	-1.83546596149005	7.712686642307
4832	chr1	-	ENSG00000159592.6	processed_transcript,processed_transcript,	protein_coding	5.30366	5.55901	5006	46126470	46153785	27316	protein_coding	KNOWN	GPBP1L1	processed_transcript	GPBP1L1-005	46153785	1	1647	10.86267	1647	1	2	-223.5|-637	4|4	0.238095238095238|0.0416666666666667	0.142857142857143|0.0833333333333333	0.0476190476190476|0.208333333333333	21|24	2|7	1|1	6|3	+|+	3	1506|1371|1156.5	4|4|4	0.125|0.0909090909090909|0.0526315789473684	0.0833333333333333|0.181818181818182|0.105263157894737	0.0833333333333333|0|0.105263157894737	24|22|19	NA|NA|1	NA|NA|4	NA|NA|1	-|-|-	0.450109978	1644	3.44130685017678	-3.35253262897293	8.40705701906484
4833	chr1	+	ENSG00000159596.6	processed_transcript,	protein_coding	58.0221	52.761	5007	46153868	46159517	5650	protein_coding	KNOWN	TMEM69	processed_transcript	TMEM69-002	46153868	1	1648	55.39155	1648	1	3	-1589|-1454|-1239.5	4|4|4	0.125|0.0909090909090909|0.0526315789473684	0.0833333333333333|0.181818181818182|0.105263157894737	0.0833333333333333|0|0.105263157894737	24|22|19	NA|NA|1	NA|NA|4	NA|NA|1	-|-|-	2	140.5|554	4|4	0.238095238095238|0.0416666666666667	0.142857142857143|0.0833333333333333	0.0476190476190476|0.208333333333333	21|24	2|7	1|1	6|3	+|+	0.476304739	1645	5.79159400432245	-3.33933058090701	6.96841346867103
4870	chr1	+	ENSG00000117472.4	processed_transcript,	protein_coding	1.64414	2.23353	5044	46646204	46651522	5319	protein_coding	KNOWN	TSPAN1	processed_transcript	TSPAN1-006	46646204	1	1663	1.938835	1663	1	0	NA	NA	NA	NA	NA	NA	NA	NA	NA	NA	1	225.5	5	0.057142857	0.057142857	0.257142857	35	NA	NA	NA	+	0.484503099	1660	0.95519003149495	-3.40352660001418	2.87318481832458
4882	chr1	-	ENSG00000085998.9	protein_coding,	protein_coding	20.313	27.1002	5056	46654391	46664098	9708	protein_coding	KNOWN	POMGNT1	protein_coding	POMGNT1-002	46664098	1	1664	23.7066	1664	1	1	-17.5	4	0.037037037	0.222222222	0	27	NA	NA	NA	-	1	65	4	0.0625	0.34375	0.03125	32	NA	NA	NA	-	0.4955009	1661	4.56721686125552	-1.37033659785632	7.43064995350073
4890	chr1	+	ENSG00000085999.6	protein_coding,	protein_coding	5.03848	3.62328	5064	46713404	46744144	30741	protein_coding	KNOWN	RAD54L	protein_coding	RAD54L-001	46713404	1	1667	4.33088	1667	1	2	-321.5|-236	4|7	0.0526315789473684|0.025	0.105263157894737|0.125	0|0.025	19|40	NA|NA	NA|NA	NA|NA	-|-	1	302.5	5	0.04	0.04	0.16	25	NA	NA	NA	-	0.49630074	1664	2.11466019877276	-1.91647480173501	5.27527557860558
4906	chr1	+	ENSG00000173660.7	processed_transcript,	protein_coding	270.646	183.646	5080	46769370	46782448	13079	protein_coding	KNOWN	UQCRH	processed_transcript	UQCRH-005	46769370	1	1669	227.146	1669	1	3	-1806|-1632.5|-649.5	4|5|4	0.0454545454545455|0.0344827586206897|0.0571428571428571	0.136363636363636|0.103448275862069|0.228571428571429	0.0909090909090909|0.172413793103448|0	22|29|35	NA|NA|NA	NA|NA|NA	NA|NA|NA	-|-|-	0	NA	NA	NA	NA	NA	NA	NA	NA	NA	NA	0.554689062	1666	7.82747608979419	-2.14943416215083	7.20973028712949
4963	chr1	-	ENSG00000079277.13	protein_coding,protein_coding,	protein_coding	11.509	11.9122	5139	47024371	47069927	45557	protein_coding	KNOWN	MKNK1	protein_coding	MKNK1-203	47069927	1	1683	23.4212	1683	1	0	NA	NA	NA	NA	NA	NA	NA	NA	NA	NA	0	NA	NA	NA	NA	NA	NA	NA	NA	NA	NA	0.5074985	1679	4.54974309001333	-0.342083792734869	6.62247370132697
4969	chr1	-	ENSG00000142961.10	protein_coding,	protein_coding	0	0.049634	5145	47073397	47082137	8741	protein_coding	KNOWN	MOBKL2C	protein_coding	MOBKL2C-002	47082137	1	1684	0.024817	1684	1	2	-47.5|-1571	7|5	0.113207547169811|0.117647058823529	0.0566037735849057|0.117647058823529	0.132075471698113|0.117647058823529	53|34	NA|NA	NA|NA	NA|NA	-|+	3	1726.5|457.5|74.5	4|4|4	0.176470588235294|0.16|0.0869565217391304	0|0.04|0.130434782608696	0.0588235294117647|0.12|0.0869565217391304	17|25|23	2|NA|NA	1|NA|NA	1|NA|NA	+|-|-	0.528294341	1680	-5.33252746377914	-2.55214792287735	4.4908273176808
4970	chr1	-	ENSG00000079277.13	protein_coding,protein_coding,	protein_coding	0.212147	0.595608	5146	47042261	47082515	40255	protein_coding	KNOWN	MKNK1	protein_coding	MKNK1-020	47082515	1	1685	0.807755	1685	1	1	-1193	5	0.117647059	0.117647059	0.117647059	34	NA	NA	NA	+	3	835.5|452.5|330.5	4|4|7	0.16|0.0869565217391304|0.113207547169811	0.04|0.130434782608696|0.0566037735849057	0.12|0.0869565217391304|0.132075471698113	25|23|53	NA|NA|NA	NA|NA|NA	NA|NA|NA	-|-|-	0.5104979	1681	-0.308010319092943	-2.59073620933812	4.38252949476172
4971	chr1	-	ENSG00000142961.10	processed_transcript,	protein_coding	0.106073	0.297804	5147	47075674	47082556	6883	protein_coding	KNOWN	MOBKL2C	processed_transcript	MOBKL2C-003	47082556	1	1686	0.2019385	1686	1	1	-1152	5	0.117647059	0.117647059	0.117647059	34	NA	NA	NA	+	3	876.5|493.5|371.5	4|4|7	0.16|0.0869565217391304|0.113207547169811	0.04|0.130434782608696|0.0566037735849057	0.12|0.0869565217391304|0.132075471698113	25|23|53	NA|NA|NA	NA|NA|NA	NA|NA|NA	-|-|-	0.50709858	1682	-2.30801210514928	-2.76414057752442	4.76566247944654
4991	chr1	-	ENSG00000159658.5	protein_coding,	protein_coding	9.49356	10.3735	5170	47124366	47184824	60459	protein_coding	KNOWN	KIAA0494	protein_coding	KIAA0494-201	47184824	1	1693	9.93353	1693	1	0	NA	NA	NA	NA	NA	NA	NA	NA	NA	NA	0	NA	NA	NA	NA	NA	NA	NA	NA	NA	NA	0.470705859	1689	3.31230648799619	-0.708394109142869	7.25768964400506
5026	chr1	-	ENSG00000225506.1	processed_transcript,	processed_transcript	0.106073	0	5205	47643841	47644943	1103	processed_transcript	NOVEL	RP1-18D14.3	processed_transcript	RP1-18D14.3-001	47644943	1	1706	0.0530365	1706	1	1	-1844	4	0	0.136363636	0.181818182	22	1	2	6	-	1	1497.5	4	0.04	0.12	0.16	25	NA	NA	NA	+	0.568086383	1702	-4.23687061793002	-2.22363652976629	4.6112909155641
5054	chr1	-	ENSG00000237424.1	processed_transcript,	processed_transcript	0	0.049634	5233	47897805	47900313	2509	processed_transcript	PUTATIVE	RP11-511I2.5	processed_transcript	RP11-511I2.5-001	47900313	1	1715	0.024817	1715	1	1	-79.5	4	0.185185185	0.222222222	0.037037037	27	3	4	7	-	2	1635|1021	4|6	0.0769230769230769|0.0882352941176471	0.115384615384615|0.0588235294117647	0.192307692307692|0.117647058823529	26|34	3|NA	7|NA	4|NA	-|+	0.636272745	1711	-5.33252746377914	-5.04449075459719	2.70593545608562
5073	chr1	+	ENSG00000117834.8	protein_coding,nonsense_mediated_decay,protein_coding,	protein_coding	11.562	10.1253	5252	48688357	48713273	24917	protein_coding	KNOWN	SLC5A9	nonsense_mediated_decay	SLC5A9-006	48688357	1	1732	32.53095	1732	1	2	-1174|-1140	4|4	0.181818181818182|0.136363636363636	0.0454545454545455|0.0454545454545455	0.136363636363636|0.136363636363636	22|22	3|NA	3|NA	3|NA	+|+	1	1417	5	0.153846154	0.076923077	0.115384615	26	NA	NA	NA	-	0.439512098	1728	5.02374104884576	-1.88682766868993	6.80258111189283
5183	chr1	-	ENSG00000085831.11	protein_coding,	protein_coding	0	0.049634	5364	51753484	51796232	42749	protein_coding	KNOWN	TTC39A	protein_coding	TTC39A-201	51796232	1	1787	0.024817	1787	1	2	-35.5|-672.5	4|5	0.04|0.27027027027027	0.2|0.0810810810810811	0|0.027027027027027	25|37	NA|NA	NA|NA	NA|NA	+|-	4	832.5|714|255|158.5	4|4|4|6	0.12|0.1|0|0.024390243902439	0.24|0|0.15|0.292682926829268	0.04|0.25|0.05|0.024390243902439	25|20|20|41	7|4|NA|NA	2|2|NA|NA	2|2|NA|NA	-|+|+|-	0.50909818	1783	-5.33252746377914	-3.44377563609371	2.52673574477205
5196	chr1	-	ENSG00000085832.12	ambiguous_orf,	protein_coding	0.212147	0	5377	51924068	51930998	6931	protein_coding	KNOWN	EPS15	ambiguous_orf	EPS15-004	51930998	1	1792	0.1060735	1792	1	0	NA	NA	NA	NA	NA	NA	NA	NA	NA	NA	0	NA	NA	NA	NA	NA	NA	NA	NA	NA	NA	0.377724455	1788	-3.23686381746411	-5.55972383410925	2.29819142716119
5230	chr1	-	ENSG00000078618.13	processed_transcript,	protein_coding	0	0.049634	5414	52254889	52255494	606	protein_coding	KNOWN	NRD1	processed_transcript	NRD1-010	52255494	1	1804	0.024817	1804	1	0	NA	NA	NA	NA	NA	NA	NA	NA	NA	NA	0	NA	NA	NA	NA	NA	NA	NA	NA	NA	NA	0.452909418	1800	-5.33252746377914	-5.54617793861977	2.20827003726161
5245	chr1	-	ENSG00000078618.13	processed_transcript,	protein_coding	46.354	53.3069	5430	52327786	52344395	16610	protein_coding	KNOWN	NRD1	processed_transcript	NRD1-006	52344395	1	1811	49.83045	1811	1	2	-18.5|-52.5	4|4	0.130434782608696|0.19047619047619	0.0434782608695652|0.0952380952380952	0.130434782608696|0	23|21	NA|1	NA|4	NA|4	-|-	0	NA	NA	NA	NA	NA	NA	NA	NA	NA	NA	0.448910218	1807	5.63895569740243	-1.44496524898891	8.01603721425425
5258	chr1	+	ENSG00000134717.13	protein_coding,	protein_coding	0.106073	0.049634	5444	52521797	52556388	34592	protein_coding	KNOWN	BTF3L4	protein_coding	BTF3L4-001	52521797	1	1819	0.0778535	1819	1	0	NA	NA	NA	NA	NA	NA	NA	NA	NA	NA	0	NA	NA	NA	NA	NA	NA	NA	NA	NA	NA	0.459708058	1815	-3.68309429087966	-2.90615859629644	6.60721206584755
5284	chr1	-	ENSG00000154222.7	processed_transcript,protein_coding,	protein_coding	4.13686	5.21157	5472	52818805	52831841	13037	protein_coding	KNOWN	CC2D1B	protein_coding	CC2D1B-202	52831841	1	1832	9.34843	1832	1	0	NA	NA	NA	NA	NA	NA	NA	NA	NA	NA	1	48	4	0.066666667	0.333333333	0.033333333	30	5	6	7	-	0.455108978	1828	3.2247240953317	-0.759744259991636	7.38095803660956
5291	chr1	-	ENSG00000085840.7	protein_coding,	protein_coding	6.41743	4.91377	5479	52838501	52870131	31631	protein_coding	KNOWN	ORC1	protein_coding	ORC1-001	52870131	1	1834	5.6656	1834	1	1	-1781	3	0.090909091	0.136363636	0	22	NA	NA	NA	-	1	244.5	4	0.12	0.16	0.08	25	NA	NA	NA	-	0.436112777	1830	2.50222874884147	-1.86774698589454	6.36807696939557
5293	chr1	+	ENSG00000134748.11	processed_transcript,	protein_coding	19.4644	10.9691	5481	52870292	52874746	4455	protein_coding	KNOWN	PRPF38A	processed_transcript	PRPF38A-001	52870292	1	1835	15.21675	1835	1	1	-405.5	4	0.12	0.16	0.08	25	NA	NA	NA	-	1	1620	3	0.090909091	0.136363636	0	22	NA	NA	NA	-	0.438312338	1831	3.92758835520314	-2.19958002327864	7.99311280781834
5353	chr1	-	ENSG00000121310.11	protein_coding,	protein_coding	23.0179	25.0652	5545	53361905	53387398	25494	protein_coding	KNOWN	ECHDC2	protein_coding	ECHDC2-001	53387398	1	1852	24.04155	1852	1	0	NA	NA	NA	NA	NA	NA	NA	NA	NA	NA	2	448|284	4|4	0.125|0.166666666666667	0.1875|0.0555555555555556	0.09375|0.0555555555555556	32|18	NA|1	NA|1	NA|3	-|+	0.442911418	1848	4.58745800696087	-2.31759929993243	6.30900165906315
5362	chr1	+	ENSG00000116171.11	protein_coding,protein_coding,protein_coding,	protein_coding	24.2908	33.3044	5554	53392958	53516642	123685	protein_coding	KNOWN	SCP2	protein_coding	SCP2-007	53392958	1	1855	86.3928	1855	1	0	NA	NA	NA	NA	NA	NA	NA	NA	NA	NA	0	NA	NA	NA	NA	NA	NA	NA	NA	NA	NA	0.447510498	1851	6.43283917767973	-1.97142520942257	6.57661897641394
5386	chr1	-	ENSG00000162383.7	processed_transcript,	protein_coding	2.06843	3.57365	5578	53552856	53556654	3799	protein_coding	KNOWN	SLC1A7	processed_transcript	SLC1A7-003	53556654	1	1867	2.82104	1867	1	0	NA	NA	NA	NA	NA	NA	NA	NA	NA	NA	1	408.5	5	0.03030303	0.121212121	0.151515152	33	NA	NA	NA	-	0.602679464	1863	1.49622712228382	-4.36881928714259	3.3966538115683
5391	chr1	+	ENSG00000157184.5	processed_transcript,	protein_coding	13.1001	13.3516	5583	53662531	53668408	5878	protein_coding	KNOWN	CPT2	processed_transcript	CPT2-002	53662531	1	1870	13.22585	1870	1	0	NA	NA	NA	NA	NA	NA	NA	NA	NA	NA	0	NA	NA	NA	NA	NA	NA	NA	NA	NA	NA	0.449310138	1866	3.72528853944808	-2.04870468507913	7.08833677899277
5398	chr1	-	ENSG00000162384.7	protein_coding,	protein_coding	25.8819	26.2068	5590	53680291	53686278	5988	protein_coding	KNOWN	C1orf123	protein_coding	C1orf123-007	53686278	1	1872	26.04435	1872	1	1	-76	6	0.03125	0.28125	0	32	NA	NA	NA	+	2	201.5|29.5	5|4	0.129032258064516|0.161290322580645	0.129032258064516|0.129032258064516	0.0967741935483871|0.0967741935483871	31|31	NA|NA	NA|NA	NA|NA	-|-	0.471105779	1868	4.70289852646711	-1.40965765081325	6.37252046361684
5429	chr1	-	ENSG00000058804.9	protein_coding,	protein_coding	17.0248	16.9252	5624	54233563	54303969	70407	protein_coding	KNOWN	TMEM48	protein_coding	TMEM48-201	54303969	1	1891	16.975	1891	1	0	NA	NA	NA	NA	NA	NA	NA	NA	NA	NA	1	134.5	4	0	0.235294118	0.058823529	17	2	2	1	-	0.432913417	1886	4.08533966935737	-1.90076672224336	6.65502558901247
5447	chr1	+	ENSG00000211452.6	protein_coding,protein_coding,nonsense_mediated_decay,protein_coding,protein_coding,	protein_coding	57.2796	52.5128	5642	54359884	54375672	15789	protein_coding	KNOWN	DIO1	protein_coding	DIO1-009	54359884	1	1894	274.481	1894	1	0	NA	NA	NA	NA	NA	NA	NA	NA	NA	NA	0	NA	NA	NA	NA	NA	NA	NA	NA	NA	NA	0.484703059	1889	8.10056247687595	-3.42041815334852	4.67215420215862
5451	chr1	-	ENSG00000081870.6	protein_coding,	protein_coding	6.73565	3.82182	5646	54389206	54411283	22078	protein_coding	KNOWN	HSPB11	protein_coding	HSPB11-004	54411283	1	1895	5.278735	1895	1	13	-126|-227.5|-357|-582.5|-761|-799.5|-1011.5|-1057|-1107.5|-1165.5|-1255|-1314|-1659	6|7|5|6|4|4|8|4|5|5|4|4|4	0.0588235294117647|0.0512820512820513|0.0294117647058824|0.027027027027027|0.0769230769230769|0.130434782608696|0.0888888888888889|0.0769230769230769|0.102564102564103|0.0740740740740741|0.230769230769231|0.0454545454545455|0.136363636363636	0.117647058823529|0.153846153846154|0.176470588235294|0.297297297297297|0.269230769230769|0.0434782608695652|0.0666666666666667|0.153846153846154|0.0769230769230769|0.148148148148148|0|0.0909090909090909|0.0454545454545455	0.147058823529412|0.102564102564103|0.117647058823529|0.135135135135135|0|0.0434782608695652|0.0888888888888889|0.0769230769230769|0.179487179487179|0.148148148148148|0.192307692307692|0.181818181818182|0.0909090909090909	34|39|34|37|26|23|45|26|39|27|26|22|22	NA|NA|NA|NA|NA|NA|NA|NA|NA|NA|2|NA|1	NA|NA|NA|NA|NA|NA|NA|NA|NA|NA|3|NA|4	NA|NA|NA|NA|NA|NA|NA|NA|NA|NA|6|NA|3	-|-|-|-|-|-|+|+|+|+|+|+|+	0	NA	NA	NA	NA	NA	NA	NA	NA	NA	NA	0.518296341	1890	2.40019224248476	-1.71075098488924	6.11485852696625
5471	chr1	-	ENSG00000116209.6	protein_coding,	protein_coding	138.001	143.045	5666	54502275	54519078	16804	protein_coding	KNOWN	TMEM59	protein_coding	TMEM59-008	54519078	1	1904	140.523	1904	1	0	NA	NA	NA	NA	NA	NA	NA	NA	NA	NA	0	NA	NA	NA	NA	NA	NA	NA	NA	NA	NA	0.455308938	1899	7.13466247161077	-1.58078036999251	6.74999551893574
5495	chr1	-	ENSG00000215883.5	protein_coding,protein_coding,	protein_coding	4.03078	4.31816	5691	54640292	54665685	25394	protein_coding	KNOWN	CYB5RL	protein_coding	CYB5RL-203	54665685	1	1913	8.34894	1913	1	0	NA	NA	NA	NA	NA	NA	NA	NA	NA	NA	0	NA	NA	NA	NA	NA	NA	NA	NA	NA	NA	0.465106979	1908	3.0615930414408	-1.46195454607456	6.12246582457475
5497	chr1	-	ENSG00000256407.1	nonsense_mediated_decay,	protein_coding	1.75021	2.58097	5693	54609065	54665746	56682	protein_coding	NOVEL	RP11-446E24.4	nonsense_mediated_decay	RP11-446E24.4-001	54665746	1	1914	2.16559	1914	1	0	NA	NA	NA	NA	NA	NA	NA	NA	NA	NA	0	NA	NA	NA	NA	NA	NA	NA	NA	NA	NA	0.464907019	1909	1.11476013077795	-1.58293986310807	6.05524790034208
5499	chr1	+	ENSG00000116221.9	protein_coding,	protein_coding	58.6055	45.6137	5695	54665873	54686529	20657	protein_coding	KNOWN	MRPL37	protein_coding	MRPL37-201	54665873	1	1915	52.1096	1915	1	0	NA	NA	NA	NA	NA	NA	NA	NA	NA	NA	0	NA	NA	NA	NA	NA	NA	NA	NA	NA	NA	0.48830234	1910	5.70347727538641	-1.69993019204661	6.87738119270052
5548	chr1	+	ENSG00000243725.1	retained_intron,	protein_coding	17.1308	23.4273	5746	55181538	55183440	1903	protein_coding	KNOWN	TTC4	retained_intron	TTC4-004	55181538	1	1932	20.27905	1932	1	0	NA	NA	NA	NA	NA	NA	NA	NA	NA	NA	0	NA	NA	NA	NA	NA	NA	NA	NA	NA	NA	0.522495501	1927	4.34191816377737	-1.80439536227662	6.60877980999959
5551	chr1	-	ENSG00000162396.5	protein_coding,	protein_coding	5.88707	6.50206	5749	55222571	55230187	7617	protein_coding	KNOWN	PARS2	protein_coding	PARS2-001	55230187	1	1933	6.194565	1933	1	1	-295.5	4	0.074074074	0.148148148	0.074074074	27	NA	NA	NA	-	0	NA	NA	NA	NA	NA	NA	NA	NA	NA	NA	0.48930214	1928	2.63100297576745	-1.02092291540932	7.08643147756976
5606	chr1	-	ENSG00000162407.8	protein_coding,	protein_coding	0.265183	0.148902	5806	56960419	57045241	84823	protein_coding	KNOWN	PPAP2B	protein_coding	PPAP2B-001	57045241	1	1970	0.2070425	1970	1	0	NA	NA	NA	NA	NA	NA	NA	NA	NA	NA	2	855.5|716	6|6	0.0606060606060606|0.15	0.181818181818182|0.2	0.121212121212121|0.025	33|40	NA|NA	NA|NA	NA|NA	+|+	0.391121776	1965	-2.27200115206261	-3.07095434214977	6.3990412976569
5618	chr1	+	ENSG00000157131.10	protein_coding,	protein_coding	8.11461	9.13266	5818	57320479	57383894	63416	protein_coding	KNOWN	C8A	protein_coding	C8A-001	57320479	1	1977	8.623635	1977	1	0	NA	NA	NA	NA	NA	NA	NA	NA	NA	NA	0	NA	NA	NA	NA	NA	NA	NA	NA	NA	NA	0.421515697	1972	3.10829611653734	-4.06127606336714	6.37672117715454
5653	chr1	-	ENSG00000162600.6	protein_coding,	protein_coding	14.2138	11.8129	5854	59002363	59012386	10024	protein_coding	KNOWN	OMA1	protein_coding	OMA1-007	59012386	1	1997	13.01335	1997	1	0	NA	NA	NA	NA	NA	NA	NA	NA	NA	NA	3	347|219.5|153.5	4|6|4	0.1|0.102564102564103|0.111111111111111	0.1|0.153846153846154|0.111111111111111	0.05|0|0.185185185185185	20|39|27	NA|NA|NA	NA|NA|NA	NA|NA|NA	+|-|-	0.456908618	1992	3.70192049477976	-1.38081800964525	5.69065197408217
5655	chr1	-	ENSG00000173406.10	processed_transcript,	protein_coding	14.2138	11.8129	5856	57463572	59012406	1548835	protein_coding	KNOWN	DAB1	processed_transcript	DAB1-001	59012406	1	1998	13.01335	1998	1	0	NA	NA	NA	NA	NA	NA	NA	NA	NA	NA	3	367|239.5|173.5	4|6|4	0.1|0.102564102564103|0.111111111111111	0.1|0.153846153846154|0.111111111111111	0.05|0|0.185185185185185	20|39|27	NA|NA|NA	NA|NA|NA	NA|NA|NA	+|-|-	0.455708858	1993	3.70192049477976	-1.42468378236815	5.5886369169835
5656	chr1	-	ENSG00000162600.6	processed_transcript,protein_coding,	protein_coding	13.5774	11.4158	5857	58999966	59012430	12465	protein_coding	KNOWN	OMA1	protein_coding	OMA1-005	59012430	1	1999	24.9932	1999	1	0	NA	NA	NA	NA	NA	NA	NA	NA	NA	NA	3	391|263.5|197.5	4|6|4	0.1|0.102564102564103|0.111111111111111	0.1|0.153846153846154|0.111111111111111	0.05|0|0.185185185185185	20|39|27	NA|NA|NA	NA|NA|NA	NA|NA|NA	+|-|-	0.454309138	1994	4.64346372334575	-1.52242210484927	5.48478285973074
5673	chr1	-	ENSG00000177606.5	protein_coding,	protein_coding	7.05387	6.40279	5874	59246465	59249785	3321	protein_coding	KNOWN	JUN	protein_coding	JUN-001	59249785	1	2006	6.72833	2006	1	5	-200.5|-368.5|-416.5|-803.5|-1587.5	4|5|4|4|4	0.24|0.162162162162162|0.0869565217391304|0.148148148148148|0.2	0.08|0.189189189189189|0.173913043478261|0.148148148148148|0.08	0|0.0540540540540541|0.0434782608695652|0.037037037037037|0	25|37|23|27|25	NA|NA|NA|NA|NA	NA|NA|NA|NA|NA	NA|NA|NA|NA|NA	-|+|+|+|+	0	NA	NA	NA	NA	NA	NA	NA	NA	NA	NA	0.48870226	2001	2.75024846624824	-1.0060691512124	7.655054160727
5678	chr1	-	ENSG00000232453.1	processed_transcript,	processed_transcript	0.0530366	0	5879	59361517	59362375	859	processed_transcript	NOVEL	RP4-794H19.1	processed_transcript	RP4-794H19.1-002	59362375	1	2009	0.0265183	2009	1	1	-101.5	5	0.260869565	0	0	23	NA	NA	NA	+	1	1144	4	0.25	0.05	0.05	20	2	2	4	+	0.440111978	2004	-5.23686789773981	-3.7543631661247	2.76018006289098
5716	chr1	-	ENSG00000134716.5	processed_transcript,processed_transcript,	protein_coding	4.98544	6.60133	5917	60358992	60392433	33442	protein_coding	KNOWN	CYP2J2	processed_transcript	CYP2J2-003	60392433	1	2020	11.58677	2020	1	1	-79.5	5	0.064516129	0.193548387	0.064516129	31	NA	NA	NA	-	1	312	4	0.136363636	0	0.136363636	22	NA	NA	NA	-	0.377724455	2015	3.53440654264385	-3.48195232996068	5.19082056925371
5737	chr1	+	ENSG00000162599.10	protein_coding,	protein_coding	4.66722	4.86413	5938	61548280	61921198	372919	protein_coding	KNOWN	NFIA	protein_coding	NFIA-003	61548280	1	2028	4.765675	2028	1	3	-396.5|-241.5|-125.5	5|4|4	0.0857142857142857|0.0740740740740741|0.16	0.142857142857143|0|0.2	0|0.0740740740740741|0	35|27|25	NA|NA|7	NA|NA|3	NA|NA|3	+|-|+	3	261.5|858.5|1083.5	9|4|5	0.0350877192982456|0.0526315789473684|0.0857142857142857	0.210526315789474|0.263157894736842|0.257142857142857	0.087719298245614|0|0.0857142857142857	57|19|35	NA|NA|NA	NA|NA|NA	NA|NA|NA	+|-|+	0.455108978	2023	2.25268056884341	-3.30185614940746	5.3297840919365
5753	chr1	-	ENSG00000162604.6	processed_transcript,	protein_coding	40.6791	46.7056	5954	62146917	62190785	43869	protein_coding	KNOWN	TM2D1	processed_transcript	TM2D1-003	62190785	1	2032	43.69235	2032	1	1	-70	4	0.318181818	0.090909091	0	22	1	4	5	+	0	NA	NA	NA	NA	NA	NA	NA	NA	NA	NA	0.462707459	2027	5.44930879833875	-2.05948895600752	7.65368209133299
5785	chr1	-	ENSG00000132854.14	protein_coding,	protein_coding	3.55346	3.17658	5986	62702651	62785085	82435	protein_coding	KNOWN	KANK4	protein_coding	KANK4-001	62785085	1	2050	3.36502	2050	1	0	NA	NA	NA	NA	NA	NA	NA	NA	NA	NA	0	NA	NA	NA	NA	NA	NA	NA	NA	NA	NA	0.476104779	2045	1.75061507952061	-3.47391519694801	5.49051906903217
5794	chr1	+	ENSG00000132855.4	protein_coding,	protein_coding	1.48503	2.3328	5996	63063158	63071830	8673	protein_coding	KNOWN	ANGPTL3	protein_coding	ANGPTL3-001	63063158	1	2053	1.908915	2053	1	0	NA	NA	NA	NA	NA	NA	NA	NA	NA	NA	0	NA	NA	NA	NA	NA	NA	NA	NA	NA	NA	0.334533093	2048	0.932752863973572	-5.53945238916615	2.39462609203707
5803	chr1	+	ENSG00000125703.8	protein_coding,protein_coding,protein_coding,protein_coding,	protein_coding	14.479	14.5924	6005	63249806	63331184	81379	protein_coding	KNOWN	ATG4C	protein_coding	ATG4C-001	63249806	1	2059	58.1428	2059	1	0	NA	NA	NA	NA	NA	NA	NA	NA	NA	NA	0	NA	NA	NA	NA	NA	NA	NA	NA	NA	NA	0.414117177	2054	5.86152864432584	-2.54371111807485	6.86207948162299
5860	chr1	+	ENSG00000079739.9	protein_coding,	protein_coding	9.97089	9.7779	6063	64058947	64125916	66970	protein_coding	KNOWN	PGM1	protein_coding	PGM1-001	64058947	1	2088	9.874395	2088	1	0	NA	NA	NA	NA	NA	NA	NA	NA	NA	NA	3	121.5|773|900.5	4|5|4	0.08|0.153846153846154|0.08	0.12|0.0769230769230769|0.16	0.08|0|0.12	25|26|25	3|NA|NA	6|NA|NA	1|NA|NA	-|-|-	0.400319936	2083	3.30369235757071	-2.11340462607533	6.70240831119232
5861	chr1	-	ENSG00000142856.12	processed_transcript,	protein_coding	0.583403	0.24817	6064	63955774	64059392	103619	protein_coding	KNOWN	ITGB3BP	processed_transcript	ITGB3BP-009	64059392	1	2089	0.4157865	2089	1	2	-328|-455.5	5|4	0.153846153846154|0.08	0.0769230769230769|0.16	0|0.12	26|25	NA|NA	NA|NA	NA|NA	-|-	1	323.5	4	0.08	0.12	0.08	25	3	6	1	-	0.456108778	2084	-1.26608517819958	-2.25290649507826	6.49621318602829
5862	chr1	+	ENSG00000079739.9	processed_transcript,	protein_coding	1.53806	0.694876	6065	64059405	64065893	6489	protein_coding	KNOWN	PGM1	processed_transcript	PGM1-003	64059405	1	2090	1.116468	2090	1	1	-336.5	4	0.08	0.12	0.08	25	3	6	1	-	2	315|442.5	5|4	0.153846153846154|0.08	0.0769230769230769|0.16	0|0.12	26|25	NA|NA	NA|NA	NA|NA	-|-	0.429714057	2085	0.158941901493654	-2.28911484493636	6.47356626994655
5913	chr1	+	ENSG00000162433.9	protein_coding,	protein_coding	22.2224	20.747	6116	65613886	65697819	83934	protein_coding	KNOWN	AK4	protein_coding	AK4-001	65613886	1	2116	21.4847	2116	1	1	-1272.5	4	0.172413793	0.034482759	0.137931034	29	NA	NA	NA	+	3	366|710.5|957.5	4|6|3	0.0769230769230769|0.153846153846154|0.0869565217391304	0.192307692307692|0.153846153846154|0.0434782608695652	0.0384615384615385|0.0769230769230769|0.130434782608696	26|39|23	NA|NA|NA	NA|NA|NA	NA|NA|NA	+|-|-	0.4985003	2111	4.42523772717566	-2.99308010292726	4.95388019176695
6002	chr1	-	ENSG00000116704.6	protein_coding,	protein_coding	13.047	12.4085	6211	67465015	67519782	54768	protein_coding	KNOWN	SLC35D1	protein_coding	SLC35D1-001	67519782	1	2151	12.72775	2151	1	0	NA	NA	NA	NA	NA	NA	NA	NA	NA	NA	1	410.5	5	0.086956522	0.130434783	0.043478261	23	NA	NA	NA	-	0.408318336	2146	3.66990549835733	-1.50880984068108	7.0748908061134
6027	chr1	-	ENSG00000142864.10	protein_coding,	protein_coding	25.8288	19.2084	6237	67878550	67896055	17506	protein_coding	KNOWN	SERBP1	protein_coding	SERBP1-006	67896055	1	2163	22.5186	2163	1	0	NA	NA	NA	NA	NA	NA	NA	NA	NA	NA	0	NA	NA	NA	NA	NA	NA	NA	NA	NA	NA	0.404519096	2158	4.49304523154878	-1.7675798650261	6.85935349218234
6037	chr1	+	ENSG00000116717.7	protein_coding,	protein_coding	37.3378	38.2678	6247	68150884	68153570	2687	protein_coding	KNOWN	GADD45A	protein_coding	GADD45A-003	68150884	1	2169	37.8028	2169	1	0	NA	NA	NA	NA	NA	NA	NA	NA	NA	NA	4	669.5|961|1059|1142	6|5|4|4	0.0851063829787234|0.1|0.0909090909090909|0.0384615384615385	0.212765957446809|0.133333333333333|0.181818181818182|0.192307692307692	0.0851063829787234|0.1|0|0.0769230769230769	47|30|22|26	NA|NA|NA|NA	NA|NA|NA|NA	NA|NA|NA|NA	+|-|+|-	0.417916417	2164	5.24042119167522	-1.38646459570267	7.43788357883574
6074	chr1	+	ENSG00000234264.1	processed_transcript,	lincRNA	0	0.148902	6286	68962359	69004310	41952	lincRNA	NOVEL	RP4-694A7.4	processed_transcript	RP4-694A7.4-001	68962359	1	2192	0.074451	2192	1	0	NA	NA	NA	NA	NA	NA	NA	NA	NA	NA	1	564	5	0	0.178571429	0.178571429	28	NA	NA	NA	+	0.387122575	2187	-3.74756496305799	-3.9389620407336	6.84808718156863
6075	chr1	-	ENSG00000024526.11	protein_coding,protein_coding,	protein_coding	9.97089	7.34584	6287	68943493	68962765	19273	protein_coding	KNOWN	DEPDC1	protein_coding	DEPDC1-201	68962765	1	2193	17.31673	2193	1	1	-158	5	0	0.178571429	0.178571429	28	NA	NA	NA	+	0	NA	NA	NA	NA	NA	NA	NA	NA	NA	NA	0.394521096	2188	4.11409461974529	-1.22667537590763	6.75869769254297
6117	chr1	-	ENSG00000118454.8	protein_coding,	protein_coding	61.5225	60.4542	6329	70726271	70820405	94135	protein_coding	KNOWN	ANKRD13C	protein_coding	ANKRD13C-001	70820405	1	2211	60.98835	2211	1	0	NA	NA	NA	NA	NA	NA	NA	NA	NA	NA	1	292.5	3	0.19047619	0.095238095	0.047619048	21	NA	NA	NA	+	0.439912018	2206	5.9304617801465	-2.27438273625565	7.39324122580766
6129	chr1	+	ENSG00000116761.7	processed_transcript,protein_coding,	protein_coding	14.7972	9.82754	6341	70876955	70905253	28299	protein_coding	KNOWN	CTH	protein_coding	CTH-001	70876955	1	2214	24.62474	2214	1	0	NA	NA	NA	NA	NA	NA	NA	NA	NA	NA	0	NA	NA	NA	NA	NA	NA	NA	NA	NA	NA	0.396320736	2209	4.62203658685979	-2.27020106354203	6.75942762056759
6148	chr1	-	ENSG00000132485.8	protein_coding,	protein_coding	89.5259	82.8392	6360	71529020	71546694	17675	protein_coding	KNOWN	ZRANB2	protein_coding	ZRANB2-002	71546694	1	2224	86.18255	2224	1	0	NA	NA	NA	NA	NA	NA	NA	NA	NA	NA	1	355.5	4	0.043478261	0.043478261	0.043478261	23	NA	NA	NA	+	0.407718456	2219	6.42932388094215	-2.70650236551856	7.2223564301756
6151	chr1	+	ENSG00000229956.1	processed_transcript,	lincRNA	1.16681	1.04231	6363	71547044	71733913	186870	lincRNA	NOVEL	RP11-386O9.1	processed_transcript	RP11-386O9.1-001	71547044	1	2225	1.10456	2225	1	1	-705.5	4	0.043478261	0.043478261	0.043478261	23	NA	NA	NA	+	0	NA	NA	NA	NA	NA	NA	NA	NA	NA	NA	0.371725655	2220	0.143471788409243	-1.9202921480377	4.40362276336332
6184	chr1	-	ENSG00000162620.10	protein_coding,retained_intron,	protein_coding	1.11377	0.347438	6398	74645591	74663831	18241	protein_coding	KNOWN	LRRIQ3	protein_coding	LRRIQ3-001	74663831	1	2247	1.461208	2247	1	0	NA	NA	NA	NA	NA	NA	NA	NA	NA	NA	0	NA	NA	NA	NA	NA	NA	NA	NA	NA	NA	0.347130574	2242	0.547161557477182	-1.44104280946842	6.13451686822085
6189	chr1	+	ENSG00000254685.1	protein_coding,protein_coding,	protein_coding	7.84942	8.28888	6404	74663926	74672918	8993	protein_coding	KNOWN	TNNI3K	protein_coding	TNNI3K-001	74663926	1	2248	24.20745	2248	1	0	NA	NA	NA	NA	NA	NA	NA	NA	NA	NA	0	NA	NA	NA	NA	NA	NA	NA	NA	NA	NA	0.353129374	2243	4.59737920949424	-1.43869438488938	6.33704041529897
6190	chr1	+	ENSG00000254685.1	nonsense_mediated_decay,protein_coding,	protein_coding	7.84942	8.28888	6406	74663928	74671890	7963	protein_coding	KNOWN	TNNI3K	protein_coding	TNNI3K-002	74663928	1	2250	24.20745	2250	1	0	NA	NA	NA	NA	NA	NA	NA	NA	NA	NA	0	NA	NA	NA	NA	NA	NA	NA	NA	NA	NA	0.353329334	2244	4.59737920949424	-1.43947677101512	6.32463798398204
6193	chr1	+	ENSG00000116783.8	protein_coding,	protein_coding	7.90246	8.28888	6409	74663947	75010108	346162	protein_coding	KNOWN	AC093158.1	protein_coding	AC093158.1-011	74663947	1	2251	8.09567	2251	1	0	NA	NA	NA	NA	NA	NA	NA	NA	NA	NA	0	NA	NA	NA	NA	NA	NA	NA	NA	NA	NA	0.354929014	2245	3.01715048332932	-1.46235209998316	6.20117135908971
6195	chr1	+	ENSG00000254685.1	protein_coding,	protein_coding	8.22068	8.88449	6411	74663951	74671907	7957	protein_coding	KNOWN	TNNI3K	protein_coding	TNNI3K-004	74663951	1	2252	8.552585	2252	1	0	NA	NA	NA	NA	NA	NA	NA	NA	NA	NA	0	NA	NA	NA	NA	NA	NA	NA	NA	NA	NA	0.355328934	2246	3.09636053731169	-1.47112462166222	6.17215962507398
6218	chr1	-	ENSG00000116791.9	protein_coding,	protein_coding	166.482	178.782	6436	75171170	75198714	27545	protein_coding	KNOWN	CRYZ	protein_coding	CRYZ-001	75198714	1	2264	172.632	2264	1	0	NA	NA	NA	NA	NA	NA	NA	NA	NA	NA	2	424|393	1|4	0|0.107142857142857	0|0.107142857142857	0|0.0714285714285714	18|28	NA|NA	NA|NA	NA|NA	+|+	0.395520896	2258	7.43155610482596	-3.02913452620799	6.88340584305248
6222	chr1	+	ENSG00000162623.9	protein_coding,	protein_coding	9.91785	8.88449	6440	75198858	75230141	31284	protein_coding	KNOWN	TYW3	protein_coding	TYW3-201	75198858	1	2265	9.40117	2265	1	2	-568|-537	1|4	0|0.107142857142857	0|0.107142857142857	0|0.0714285714285714	18|28	NA|NA	NA|NA	NA|NA	+|+	0	NA	NA	NA	NA	NA	NA	NA	NA	NA	NA	0.427314537	2259	3.232840315105	-3.14304135898221	7.21583006324499
6224	chr1	-	ENSG00000116791.9	protein_coding,	protein_coding	1.5911	1.14158	6442	75171174	75199092	27919	protein_coding	KNOWN	CRYZ	protein_coding	CRYZ-201	75199092	1	2266	1.36634	2266	1	1	-1987.5	4	0.137931034	0.034482759	0.24137931	29	NA	NA	NA	-	2	802|771	1|4	0|0.107142857142857	0|0.107142857142857	0|0.0714285714285714	18|28	NA|NA	NA|NA	NA|NA	+|+	0.382923415	2260	0.450316528488038	-4.54284485938126	6.27915937543128
6253	chr1	+	ENSG00000117054.8	nonsense_mediated_decay,protein_coding,nonsense_mediated_decay,	protein_coding	61.4695	61.4966	6471	76190452	76228853	38402	protein_coding	KNOWN	ACADM	nonsense_mediated_decay	ACADM-007	76190452	1	2283	184.44915	2283	1	2	-443.5|-92	5|5	0.128205128205128|0.0454545454545455	0.153846153846154|0.136363636363636	0.153846153846154|0.0454545454545455	39|22	NA|NA	NA|NA	NA|NA	-|-	0	NA	NA	NA	NA	NA	NA	NA	NA	NA	NA	0.432713457	2277	7.52707933042789	-2.59945326038545	6.22456530359914
6264	chr1	+	ENSG00000137955.10	processed_transcript,processed_transcript,	protein_coding	14.532	16.7763	6483	76251913	76257256	5344	protein_coding	KNOWN	RABGGTB	processed_transcript	RABGGTB-004	76251913	1	2286	31.3083	2286	1	0	NA	NA	NA	NA	NA	NA	NA	NA	NA	NA	0	NA	NA	NA	NA	NA	NA	NA	NA	NA	NA	0.425314937	2280	4.96847326902494	-2.43283614717707	7.52169157933374
6274	chr1	+	ENSG00000207241.1	snoRNA,	snoRNA	1.21984	1.53865	6493	76253574	76253657	84	snoRNA	KNOWN	SNORD45A	snoRNA	SNORD45A-201	76253574	1	2289	1.379245	2289	1	0	NA	NA	NA	NA	NA	NA	NA	NA	NA	NA	0	NA	NA	NA	NA	NA	NA	NA	NA	NA	NA	0.429714057	2283	0.463878750463191	-5.57339812253724	5.44712978574969
6275	chr1	+	ENSG00000201487.1	snoRNA,	snoRNA	0.31822	0.148902	6494	76255162	76255233	72	snoRNA	KNOWN	SNORD45B	snoRNA	SNORD45B-201	76255162	1	2290	0.233561	2290	1	0	NA	NA	NA	NA	NA	NA	NA	NA	NA	NA	0	NA	NA	NA	NA	NA	NA	NA	NA	NA	NA	0.421915617	2284	-2.0981287016793	-5.42966916332149	3.92242699178953
6276	chr1	+	ENSG00000137955.10	processed_transcript,	protein_coding	3.02309	2.03499	6495	76256954	76257544	591	protein_coding	KNOWN	RABGGTB	processed_transcript	RABGGTB-009	76256954	1	2291	2.52904	2291	1	0	NA	NA	NA	NA	NA	NA	NA	NA	NA	NA	0	NA	NA	NA	NA	NA	NA	NA	NA	NA	NA	0.384923015	2285	1.3385898552476	-5.58720326112291	2.62489820041975
6327	chr1	-	ENSG00000036549.8	processed_transcript,protein_coding,	protein_coding	12.6758	13.3019	6547	78098867	78148360	49494	protein_coding	KNOWN	ZZZ3	protein_coding	ZZZ3-010	78148360	1	2318	25.9777	2318	1	3	-352.5|-519.5|-938	7|4|4	0.116279069767442|0.142857142857143|0.125	0.116279069767442|0|0.166666666666667	0.116279069767442|0.0952380952380952|0.0416666666666667	43|21|24	NA|NA|NA	NA|NA|NA	NA|NA|NA	-|-|-	0	NA	NA	NA	NA	NA	NA	NA	NA	NA	NA	0.522495501	2312	4.69920179874928	-3.38985180708264	7.05382826394038
6347	chr1	+	ENSG00000180488.8	protein_coding,	protein_coding	2.65183	2.97804	6569	78245334	78340825	95492	protein_coding	KNOWN	FAM73A	protein_coding	FAM73A-201	78245334	1	2321	2.814935	2321	1	0	NA	NA	NA	NA	NA	NA	NA	NA	NA	NA	1	102	4	0.05	0.15	0.05	20	NA	NA	NA	+	0.429914017	2315	1.49310160924677	-1.92576311569033	5.71629978563967
6356	chr1	+	ENSG00000162614.13	protein_coding,protein_coding,	protein_coding	0.742513	0.893412	6578	78354200	78409576	55377	protein_coding	KNOWN	NEXN	protein_coding	NEXN-202	78354200	1	2327	1.635925	2327	1	0	NA	NA	NA	NA	NA	NA	NA	NA	NA	NA	1	809	3	0.071428571	0.035714286	0.142857143	28	NA	NA	NA	-	0.456308738	2321	0.710106608543521	-2.76120341227966	4.67572609156862
6385	chr1	+	ENSG00000162616.7	processed_transcript,	protein_coding	4.61419	4.16926	6608	78470619	78481983	11365	protein_coding	KNOWN	DNAJB4	processed_transcript	DNAJB4-002	78470619	1	2333	4.391725	2333	1	1	-737.5	4	0.111111111	0.074074074	0.111111111	27	NA	NA	NA	+	0	NA	NA	NA	NA	NA	NA	NA	NA	NA	NA	0.343531294	2327	2.13478771883366	-4.24602586350453	6.39081227099936
6387	chr1	+	ENSG00000137960.5	protein_coding,	protein_coding	0.0530366	0	6610	78511586	78604133	92548	protein_coding	KNOWN	GIPC2	protein_coding	GIPC2-001	78511586	1	2335	0.0265183	2335	1	0	NA	NA	NA	NA	NA	NA	NA	NA	NA	NA	1	2.5	4	0.047619048	0.142857143	0.047619048	21	5	1	1	+	0.439112178	2329	-5.23686789773981	-2.24741577662449	5.99002921858367
6450	chr1	+	ENSG00000117114.14	protein_coding,protein_coding,protein_coding,protein_coding,protein_coding,protein_coding,protein_coding,	protein_coding	0.530366	0.198536	6676	82266082	82458106	192025	protein_coding	KNOWN	LPHN2	protein_coding	LPHN2-201	82266082	1	2378	2.551157	2378	1	0	NA	NA	NA	NA	NA	NA	NA	NA	NA	NA	2	486.5|1388	4|4	0.260869565217391|0.05	0|0.2	0|0	23|20	NA|1	NA|1	NA|4	+|-	0.337332533	2372	1.35115168614215	-3.82416755938835	4.46375375387841
6519	chr1	+	ENSG00000117133.6	protein_coding,	protein_coding	26.9957	19.5558	6748	84944950	84963473	18524	protein_coding	KNOWN	RPF1	protein_coding	RPF1-001	84944950	1	2402	23.27575	2402	1	0	NA	NA	NA	NA	NA	NA	NA	NA	NA	NA	0	NA	NA	NA	NA	NA	NA	NA	NA	NA	NA	0.382523495	2396	4.54075575048444	-3.38532222613896	5.87155804115932
6520	chr1	-	ENSG00000174021.6	processed_transcript,	protein_coding	0.15911	0	6749	84964008	84969516	5509	protein_coding	KNOWN	GNG5	processed_transcript	GNG5-003	84969516	1	2403	0.079555	2403	1	0	NA	NA	NA	NA	NA	NA	NA	NA	NA	NA	0	NA	NA	NA	NA	NA	NA	NA	NA	NA	NA	0.457308538	2397	-3.65190358356136	-5.55972383410925	3.46393733429307
6530	chr1	-	ENSG00000117151.6	processed_transcript,	protein_coding	8.00853	8.13998	6760	85028940	85040113	11174	protein_coding	KNOWN	CTBS	processed_transcript	CTBS-004	85040113	1	2407	8.074255	2407	1	1	-91.5	14	0.120481928	0.144578313	0.048192771	83	NA	NA	NA	+	0	NA	NA	NA	NA	NA	NA	NA	NA	NA	NA	0.418916217	2401	3.01332915053233	-1.55808739373154	7.06825382869101
6562	chr1	+	ENSG00000162643.8	protein_coding,	protein_coding	0.0530366	0.049634	6792	85528004	85598820	70817	protein_coding	KNOWN	WDR63	protein_coding	WDR63-002	85528004	1	2416	0.0513353	2416	1	0	NA	NA	NA	NA	NA	NA	NA	NA	NA	NA	1	1024	4	0.166666667	0	0.055555556	18	1	1	2	+	0.398320336	2410	-4.28390497366436	-4.10777842564596	3.29077943693185
6567	chr1	-	ENSG00000162642.9	processed_transcript,protein_coding,	protein_coding	32.6175	33.3044	6798	85723126	85725316	2191	protein_coding	KNOWN	C1orf52	protein_coding	C1orf52-002	85725316	1	2418	65.9219	2418	1	0	NA	NA	NA	NA	NA	NA	NA	NA	NA	NA	0	NA	NA	NA	NA	NA	NA	NA	NA	NA	NA	0.414317137	2412	6.04268591934228	-1.49654537703978	6.60987915625265
6572	chr1	+	ENSG00000223653.1	processed_transcript,	lincRNA	0	0.049634	6803	85742398	85865646	123249	lincRNA	NOVEL	RP11-131L23.1	processed_transcript	RP11-131L23.1-001	85742398	1	2421	0.024817	2421	1	1	-450.5	4	0	0.176470588	0	17	NA	NA	NA	-	1	237	4	0.227272727	0.090909091	0.090909091	22	2	3	4	-	0.428514297	2415	-5.33252746377914	-1.25911211280823	5.9306996932676
6588	chr1	+	ENSG00000142871.10	protein_coding,protein_coding,	protein_coding	6.09921	4.8145	6819	86046444	86049645	3202	protein_coding	KNOWN	CYR61	protein_coding	CYR61-001	86046444	1	2428	10.91371	2428	1	2	-1913|-766	5|3	0.125|0	0.0625|0.0454545454545455	0.03125|0.0454545454545455	32|22	NA|NA	NA|NA	NA|NA	-|-	2	97|346	7|4	0.0714285714285714|0.230769230769231	0.214285714285714|0.153846153846154	0.0476190476190476|0.0769230769230769	42|26	NA|NA	NA|NA	NA|NA	-|-	0.522295541	2422	3.44806970880855	-2.20422644641802	7.35596421535098
6593	chr1	-	ENSG00000117174.6	protein_coding,	protein_coding	15.4867	12.7063	6824	86118491	86174101	55611	protein_coding	KNOWN	ZNHIT6	protein_coding	ZNHIT6-001	86174101	1	2431	14.0965	2431	1	0	NA	NA	NA	NA	NA	NA	NA	NA	NA	NA	1	943	4	0.125	0	0.166666667	24	1	2	7	-	0.411117776	2425	3.81726509726679	-2.24058160442326	5.92263572471136
6643	chr1	+	ENSG00000097033.9	protein_coding,	protein_coding	3.39435	3.57365	6877	87170578	87208951	38374	protein_coding	KNOWN	SH3GLB1	protein_coding	SH3GLB1-002	87170578	1	2446	3.484	2446	1	0	NA	NA	NA	NA	NA	NA	NA	NA	NA	NA	1	302	4	0.05	0.15	0.05	20	NA	NA	NA	+	0.426914617	2439	1.80074462393678	-2.67207350531686	6.79500851466654
6680	chr1	-	ENSG00000237505.1	processed_transcript,	lincRNA	0.15911	0.049634	6914	89005986	89150635	144650	lincRNA	NOVEL	RP11-76N22.2	processed_transcript	RP11-76N22.2-002	89150635	1	2465	0.104372	2465	1	1	-27	4	0.142857143	0.178571429	0.071428571	28	NA	NA	NA	-	3	1468.5|803.5|436	4|5|5	0.142857142857143|0.142857142857143|0.125	0.0476190476190476|0.142857142857143|0.125	0.0476190476190476|0.114285714285714|0.0625	21|35|32	NA|NA|NA	NA|NA|NA	NA|NA|NA	-|-|-	0.352529494	2458	-3.26019336458042	-3.15970511950022	7.0976235069023
6689	chr1	-	ENSG00000137947.7	processed_transcript,	protein_coding	23.9726	21.1441	6925	89322948	89357210	34263	protein_coding	KNOWN	GTF2B	processed_transcript	GTF2B-005	89357210	1	2470	22.55835	2470	1	2	-111|-414.5	4|4	0.181818181818182|0	0.136363636363636|0.0869565217391304	0.0909090909090909|0.0869565217391304	22|23	4|NA	2|NA	4|NA	+|-	1	397.5	2	0	0.105263158	0	19	NA	NA	NA	+	0.420915817	2463	4.4955896425056	-3.17135538732535	6.842662202589
6702	chr1	-	ENSG00000213516.5	protein_coding,	protein_coding	0.583403	0.694876	6938	89445142	89458643	13502	protein_coding	KNOWN	RBMXL1	protein_coding	RBMXL1-201	89458643	1	2475	0.6391395	2475	1	0	NA	NA	NA	NA	NA	NA	NA	NA	NA	NA	3	318.5|149.5|5.5	4|10|5	0.04|0.126984126984127|0.111111111111111	0.24|0.142857142857143|0.111111111111111	0.12|0.111111111111111|0.111111111111111	25|63|27	5|NA|NA	7|NA|NA	1|NA|NA	+|+|+	0.411717656	2468	-0.645797243537752	-1.83495124164588	5.87028598193372
6709	chr1	-	ENSG00000117226.6	nonsense_mediated_decay,protein_coding,	protein_coding	0.106073	0.148902	6945	89476628	89488521	11894	protein_coding	KNOWN	GBP3	protein_coding	GBP3-003	89488521	1	2479	0.254975	2479	1	0	NA	NA	NA	NA	NA	NA	NA	NA	NA	NA	0	NA	NA	NA	NA	NA	NA	NA	NA	NA	NA	0.359528094	2472	-1.97157229542733	-5.18962761285533	3.85104018306785
6766	chr1	+	ENSG00000171492.10	protein_coding,	protein_coding	18.4568	17.7193	7003	90286573	90398719	112147	protein_coding	KNOWN	LRRC8D	protein_coding	LRRC8D-004	90286573	1	2501	18.08805	2501	1	0	NA	NA	NA	NA	NA	NA	NA	NA	NA	NA	1	145.5	5	0.103448276	0.24137931	0.034482759	29	NA	NA	NA	+	0.420715857	2493	4.17696498007332	-1.9822149181315	6.2189827688865
6800	chr1	-	ENSG00000122482.15	processed_transcript,	protein_coding	12.7818	13.699	7037	91381947	91487571	105625	protein_coding	KNOWN	ZNF644	processed_transcript	ZNF644-007	91487571	1	2515	13.2404	2515	1	0	NA	NA	NA	NA	NA	NA	NA	NA	NA	NA	1	363.5	4	0.060606061	0.121212121	0.060606061	33	NA	NA	NA	-	0.413317337	2507	3.726874802327	-1.85777736941448	6.74271237546032
6810	chr1	-	ENSG00000252229.1	miRNA,	miRNA	26.094	26.1075	7048	91852862	91852949	88	miRNA	NOVEL	AC098691.1	miRNA	AC098691.1-201	91852949	1	2520	26.10075	2520	1	1	-385	4	0.090909091	0.045454545	0.045454545	22	NA	NA	NA	+	0	NA	NA	NA	NA	NA	NA	NA	NA	NA	NA	0.400319936	2512	4.70601935784094	-5.98384026966664	4.06970284154004
6817	chr1	-	ENSG00000162669.10	protein_coding,protein_coding,protein_coding,	protein_coding	0.212147	0.446706	7055	91726324	91870426	144103	protein_coding	KNOWN	HFM1	protein_coding	HFM1-201	91870426	1	2521	0.9882795	2521	1	0	NA	NA	NA	NA	NA	NA	NA	NA	NA	NA	0	NA	NA	NA	NA	NA	NA	NA	NA	NA	NA	0.377924415	2513	-0.017008979961621	-4.01389341306	4.44482658762397
6818	chr1	+	ENSG00000097046.7	protein_coding,	protein_coding	3.23524	3.07731	7056	91966404	91991321	24918	protein_coding	KNOWN	CDC7	protein_coding	CDC7-202	91966404	1	2522	3.156275	2522	1	0	NA	NA	NA	NA	NA	NA	NA	NA	NA	NA	0	NA	NA	NA	NA	NA	NA	NA	NA	NA	NA	0.406318736	2514	1.65822290999399	-2.26672547990145	5.13086533916549
6839	chr1	-	ENSG00000069702.6	processed_transcript,	protein_coding	37.1787	34.3467	7077	92329396	92351708	22313	protein_coding	KNOWN	TGFBR3	processed_transcript	TGFBR3-003	92351708	1	2529	35.7627	2529	1	0	NA	NA	NA	NA	NA	NA	NA	NA	NA	NA	0	NA	NA	NA	NA	NA	NA	NA	NA	NA	NA	0.476304739	2521	5.16038375561342	-1.9202921480377	6.8339628807283
6855	chr1	-	ENSG00000230667.3	processed_pseudogene,	pseudogene	0.0530366	0	7093	92540077	92540968	892	pseudogene	KNOWN	RP4-621B10.3	processed_pseudogene	RP4-621B10.3-001	92540968	1	2534	0.0265183	2534	1	0	NA	NA	NA	NA	NA	NA	NA	NA	NA	NA	0	NA	NA	NA	NA	NA	NA	NA	NA	NA	NA	0.419716057	2526	-5.23686789773981	-5.38678517280549	2.70257067225105
6856	chr1	+	ENSG00000189195.5	protein_coding,	protein_coding	0.47733	0.297804	7094	92545862	92605503	59642	protein_coding	KNOWN	BTBD8	protein_coding	BTBD8-001	92545862	1	2535	0.387567	2535	1	0	NA	NA	NA	NA	NA	NA	NA	NA	NA	NA	0	NA	NA	NA	NA	NA	NA	NA	NA	NA	NA	0.418116377	2527	-1.36748235943664	-2.1253147147819	5.31456634357886
6870	chr1	+	ENSG00000122484.6	protein_coding,	protein_coding	0.15911	0.198536	7108	92764522	92853730	89209	protein_coding	KNOWN	RPAP2	protein_coding	RPAP2-001	92764522	1	2544	0.178823	2544	1	0	NA	NA	NA	NA	NA	NA	NA	NA	NA	NA	0	NA	NA	NA	NA	NA	NA	NA	NA	NA	NA	0.380923815	2536	-2.48339578872444	-2.03740805347552	6.53655664298694
6872	chr1	-	ENSG00000174842.11	protein_coding,processed_transcript,nonsense_mediated_decay,	protein_coding	9.44052	8.63632	7110	92763078	92764544	1467	protein_coding	KNOWN	GLMN	processed_transcript	GLMN-003	92764544	1	2545	27.11526	2545	1	0	NA	NA	NA	NA	NA	NA	NA	NA	NA	NA	0	NA	NA	NA	NA	NA	NA	NA	NA	NA	NA	0.389722056	2537	4.76103309887177	-2.15649205149367	7.02666735888078
6873	chr1	+	ENSG00000122484.6	protein_coding,	protein_coding	31.9811	31.9643	7111	92764605	92829329	64725	protein_coding	KNOWN	RPAP2	protein_coding	RPAP2-201	92764605	1	2546	31.9727	2546	1	0	NA	NA	NA	NA	NA	NA	NA	NA	NA	NA	0	NA	NA	NA	NA	NA	NA	NA	NA	NA	NA	0.388122376	2538	4.99876867548166	-1.99366029436023	6.54606728490103
6934	chr1	+	ENSG00000122483.12	processed_transcript,	protein_coding	0.265183	0.347438	7172	93645487	93651957	6471	protein_coding	KNOWN	CCDC18	processed_transcript	CCDC18-009	93645487	1	2577	0.3063105	2577	1	1	-1347.5	4	0.121212121	0.090909091	0.121212121	33	NA	NA	NA	-	1	496.5	4	0.095238095	0.142857143	0.142857143	21	2	5	1	+	0.374525095	2569	-1.70693327304258	-3.21489646832382	7.74721287614142
6937	chr1	+	ENSG00000122483.12	protein_coding,protein_coding,protein_coding,	protein_coding	0.0530366	0	7175	93645920	93744270	98351	protein_coding	KNOWN	CCDC18	protein_coding	CCDC18-201	93645920	1	2579	0.0795549	2579	1	1	-1780.5	4	0.121212121	0.090909091	0.121212121	33	NA	NA	NA	-	1	63.5	4	0.095238095	0.142857143	0.142857143	21	2	5	1	+	0.400919816	2571	-3.65190539701865	-3.13035284150459	2.71466491602341
6940	chr1	+	ENSG00000122483.12	protein_coding,	protein_coding	2.5988	2.53134	7178	93646273	93651955	5683	protein_coding	KNOWN	CCDC18	protein_coding	CCDC18-006	93646273	1	2581	2.56507	2581	1	1	-289.5	4	0.095238095	0.142857143	0.142857143	21	2	5	1	+	0	NA	NA	NA	NA	NA	NA	NA	NA	NA	NA	0.435912817	2573	1.35899819708959	-2.86038905207815	6.10232237463086
6972	chr1	+	ENSG00000117505.7	protein_coding,	protein_coding	25.7228	16.0814	7212	93811492	93826725	15234	protein_coding	KNOWN	DR1	protein_coding	DR1-002	93811492	1	2588	20.9021	2588	1	2	-479|-292.5	5|4	0.0666666666666667|0.0952380952380952	0.1|0.0476190476190476	0.166666666666667|0.142857142857143	30|21	NA|NA	NA|NA	NA|NA	-|-	0	NA	NA	NA	NA	NA	NA	NA	NA	NA	NA	0.403719256	2580	4.38557598970014	-2.21892737437603	5.94996461835641
6978	chr1	+	ENSG00000137942.10	protein_coding,protein_coding,	protein_coding	11.2968	11.8625	7218	93913688	94020216	106529	protein_coding	KNOWN	FNBP1L	protein_coding	FNBP1L-201	93913688	1	2593	23.1593	2593	1	1	-69.5	5	0.074074074	0.185185185	0	27	NA	NA	NA	-	0	NA	NA	NA	NA	NA	NA	NA	NA	NA	NA	0.399120176	2585	4.53351974278314	-1.57819343858097	6.80594772471742
6987	chr1	+	ENSG00000224093.1	processed_transcript,processed_transcript,	processed_transcript	68.5764	111.031	7228	94057807	94071130	13324	processed_transcript	PUTATIVE	RP5-1033H22.2	processed_transcript	RP5-1033H22.2-001	94057807	1	2597	179.6074	2597	1	0	NA	NA	NA	NA	NA	NA	NA	NA	NA	NA	0	NA	NA	NA	NA	NA	NA	NA	NA	NA	NA	0.479304139	2589	7.48870298152065	-3.38381549552768	6.91901118027701
6993	chr1	-	ENSG00000137936.11	protein_coding,	protein_coding	0.63644	0.397072	7234	94027348	94147385	120038	protein_coding	KNOWN	BCAR3	protein_coding	BCAR3-001	94147385	1	2598	0.516756	2598	1	0	NA	NA	NA	NA	NA	NA	NA	NA	NA	NA	3	1388|621|24	4|5|4	0.25|0.125|0.05	0.178571428571429|0.166666666666667|0.2	0.107142857142857|0|0	28|24|20	NA|NA|NA	NA|NA|NA	NA|NA|NA	-|+|-	0.403119376	2590	-0.952444860157796	-3.20421978746225	5.64297898400735
7001	chr1	-	ENSG00000067334.8	nonsense_mediated_decay,	protein_coding	26.4122	28.4899	7242	94335354	94344718	9365	protein_coding	KNOWN	DNTTIP2	nonsense_mediated_decay	DNTTIP2-007	94344718	1	2603	27.45105	2603	1	0	NA	NA	NA	NA	NA	NA	NA	NA	NA	NA	0	NA	NA	NA	NA	NA	NA	NA	NA	NA	NA	0.407718456	2595	4.77878942811862	-1.55003822589204	7.32893701572531
7007	chr1	-	ENSG00000023909.5	protein_coding,	protein_coding	4.61419	5.06267	7248	94350761	94374966	24206	protein_coding	KNOWN	GCLM	protein_coding	GCLM-001	94374966	1	2604	4.83843	2604	1	1	-119	5	0.09375	0.1875	0.0625	32	NA	NA	NA	+	2	467.5|206.5	4|4	0.142857142857143|0	0.0952380952380952|0.210526315789474	0.0476190476190476|0.0526315789473684	21|19	3|4	1|1	5|1	-|+	0.409918016	2596	2.27453898992564	-1.8541216985985	5.43370754570805
7028	chr1	-	ENSG00000198691.6	processed_transcript,	protein_coding	0.0530366	0.049634	7269	94484956	94486923	1968	protein_coding	KNOWN	ABCA4	processed_transcript	ABCA4-005	94486923	1	2621	0.0513353	2621	1	0	NA	NA	NA	NA	NA	NA	NA	NA	NA	NA	0	NA	NA	NA	NA	NA	NA	NA	NA	NA	NA	0.459108178	2613	-4.28390497366436	-4.14302860684888	3.36888119911207
7037	chr1	-	ENSG00000137962.7	protein_coding,	protein_coding	9.01623	7.64364	7278	94637307	94703121	65815	protein_coding	KNOWN	ARHGAP29	protein_coding	ARHGAP29-001	94703121	1	2624	8.329935	2624	1	3	-86.5|-374|-1019	8|4|4	0.0784313725490196|0.136363636363636|0.142857142857143	0.235294117647059|0.0909090909090909|0.107142857142857	0.0784313725490196|0.136363636363636|0.142857142857143	51|22|28	NA|NA|1	NA|NA|7	NA|NA|7	-|+|+	1	345	4	0.115384615	0.192307692	0.076923077	26	NA	NA	NA	-	0.415916817	2616	3.05830523802257	-2.28911484493636	6.66846534478154
7066	chr1	-	ENSG00000224081.2	processed_transcript,processed_transcript,	processed_transcript	2.12147	2.58097	7307	95170995	95285775	114781	processed_transcript	NOVEL	RP11-86H7.1	processed_transcript	RP11-86H7.1-002	95285775	1	2637	4.70244	2637	1	3	-101|-138|-452.5	5|6|4	0.0416666666666667|0|0.0909090909090909	0.208333333333333|0.205882352941176|0.212121212121212	0|0.0882352941176471|0	24|34|33	NA|NA|NA	NA|NA|NA	NA|NA|NA	-|-|+	0	NA	NA	NA	NA	NA	NA	NA	NA	NA	NA	0.460107978	2629	2.23340953603881	-2.63306736910935	6.01327484211723
7082	chr1	-	ENSG00000117519.11	protein_coding,	protein_coding	49.3241	47.4501	7325	95362766	95392638	29873	protein_coding	KNOWN	CNN3	protein_coding	CNN3-202	95392638	1	2640	48.3871	2640	1	1	-211	8	0.086956522	0.195652174	0.043478261	46	NA	NA	NA	-	1	275	5	0.029411765	0.352941176	0.058823529	34	NA	NA	NA	-	0.457908418	2632	5.59655057117603	-1.57647131078396	6.93822943269079
7091	chr1	-	ENSG00000172339.7	protein_coding,	protein_coding	9.38749	9.08303	7334	95448297	95538501	90205	protein_coding	KNOWN	ALG14	protein_coding	ALG14-001	95538501	1	2644	9.23526	2644	1	0	NA	NA	NA	NA	NA	NA	NA	NA	NA	NA	1	1256.5	4	0.148148148	0.185185185	0.148148148	27	7	6	2	-	0.446310738	2636	3.20715257793002	-2.97141954843361	5.61554604468172
7092	chr1	+	ENSG00000152078.5	protein_coding,	protein_coding	1.69717	2.58097	7335	95582894	95663163	80270	protein_coding	KNOWN	TMEM56	protein_coding	TMEM56-001	95582894	1	2645	2.13907	2645	1	0	NA	NA	NA	NA	NA	NA	NA	NA	NA	NA	2	124|576.5	4|5	0.142857142857143|0	0.25|0.378378378378378	0.0714285714285714|0	28|37	5|NA	7|NA	4|NA	-|-	0.413917217	2637	1.09698369475188	-2.20622225993575	6.94832993989491
7101	chr1	+	ENSG00000122481.12	protein_coding,	protein_coding	16.2292	16.8259	7344	95699759	95711058	11300	protein_coding	KNOWN	RWDD3	protein_coding	RWDD3-201	95699759	1	2650	16.52755	2650	1	2	-172.5|-97.5	6|4	0.121212121212121|0.0526315789473684	0.181818181818182|0.157894736842105	0.0303030303030303|0	33|19	NA|NA	NA|NA	NA|NA	-|-	1	400	5	0.066666667	0.1	0.1	30	NA	NA	NA	-	0.418716257	2642	4.0468009740961	-1.57862422944043	6.88532067879149
7137	chr1	+	ENSG00000117569.12	protein_coding,protein_coding,	protein_coding	5.62188	5.95608	7380	97187366	97280349	92984	protein_coding	KNOWN	PTBP2	protein_coding	PTBP2-004	97187366	1	2669	11.57796	2669	1	1	-151.5	4	0.12	0.12	0.12	25	NA	NA	NA	-	2	152.5|628	4|4	0.105263157894737|0.153846153846154	0.157894736842105|0.115384615384615	0|0.0384615384615385	19|26	NA|NA	NA|NA	NA|NA	-|+	0.403119376	2661	3.53330917229478	-2.34372515215182	6.3608419238291
7168	chr1	+	ENSG00000162627.12	nonsense_mediated_decay,	protein_coding	6.47047	5.65828	7411	99127418	99226056	98639	protein_coding	KNOWN	SNX7	nonsense_mediated_decay	SNX7-002	99127418	1	2685	6.064375	2685	1	3	-329.5|-235.5|-189	4|4|4	0.111111111111111|0.0645161290322581|0.15625	0.148148148148148|0.225806451612903|0.25	0.0740740740740741|0.032258064516129|0.0625	27|31|32	NA|NA|NA	NA|NA|NA	NA|NA|NA	-|+|+	0	NA	NA	NA	NA	NA	NA	NA	NA	NA	NA	0.447710458	2677	2.60035896754477	-2.25084508953291	5.04832375257422
7186	chr1	-	ENSG00000156869.7	retained_intron,	protein_coding	14.7972	13.0041	7429	100213151	100232187	19037	protein_coding	KNOWN	FRRS1	retained_intron	FRRS1-004	100232187	1	2694	13.90065	2694	1	1	-1130	4	0.136363636	0.045454545	0.181818182	22	NA	NA	NA	+	1	483	5	0.192307692	0.038461538	0.115384615	26	NA	NA	NA	+	0.403719256	2686	3.79708044041538	-3.94784012192964	6.26553458551105
7191	chr1	+	ENSG00000162688.11	protein_coding,	protein_coding	8.75105	10.0261	7434	100315640	100389576	73937	protein_coding	KNOWN	AGL	protein_coding	AGL-001	100315640	1	2699	9.388575	2699	1	1	-1629	3	0.041666667	0	0.166666667	24	NA	NA	NA	-	0	NA	NA	NA	NA	NA	NA	NA	NA	NA	NA	0.406918616	2691	3.23090620192129	-1.43322966261265	6.01677283629009
7197	chr1	+	ENSG00000117620.7	protein_coding,protein_coding,	protein_coding	0	0.099268	7440	100435345	100489009	53665	protein_coding	KNOWN	SLC35A3	protein_coding	SLC35A3-001	100435345	1	2700	0.099268	2700	1	0	NA	NA	NA	NA	NA	NA	NA	NA	NA	NA	0	NA	NA	NA	NA	NA	NA	NA	NA	NA	NA	0.416916617	2692	-3.33252746377914	-2.61086495477202	5.78968774866469
7198	chr1	-	ENSG00000228084.1	processed_transcript,	processed_transcript	0.424293	0.24817	7441	100433939	100435420	1482	processed_transcript	NOVEL	RP5-884G6.2	processed_transcript	RP5-884G6.2-001	100435420	1	2701	0.3362315	2701	1	0	NA	NA	NA	NA	NA	NA	NA	NA	NA	NA	0	NA	NA	NA	NA	NA	NA	NA	NA	NA	NA	0.434313137	2693	-1.57247320444487	-2.06370468850531	6.7439566185644
7199	chr1	+	ENSG00000117620.7	protein_coding,	protein_coding	4.349	3.07731	7442	100435535	100488512	52978	protein_coding	KNOWN	SLC35A3	protein_coding	SLC35A3-004	100435535	1	2702	3.713155	2702	1	0	NA	NA	NA	NA	NA	NA	NA	NA	NA	NA	0	NA	NA	NA	NA	NA	NA	NA	NA	NA	NA	0.427714457	2694	1.89264553955677	-2.09541340835991	6.15211054418681
7214	chr1	+	ENSG00000122435.5	protein_coding,	protein_coding	9.1223	10.4728	7458	100598719	100616053	17335	protein_coding	KNOWN	CCDC76	protein_coding	CCDC76-001	100598719	1	2711	9.79755	2711	1	0	NA	NA	NA	NA	NA	NA	NA	NA	NA	NA	0	NA	NA	NA	NA	NA	NA	NA	NA	NA	NA	0.414117177	2703	3.29242103037589	-2.79785432028021	5.524928972293
7221	chr1	-	ENSG00000137992.8	protein_coding,	protein_coding	13.2592	12.0114	7465	100676099	100715376	39278	protein_coding	KNOWN	DBT	protein_coding	DBT-002	100715376	1	2715	12.6353	2715	1	0	NA	NA	NA	NA	NA	NA	NA	NA	NA	NA	0	NA	NA	NA	NA	NA	NA	NA	NA	NA	NA	0.368726255	2707	3.65938801349329	-1.30008949162161	7.4538336546081
7224	chr1	-	ENSG00000224616.1	processed_transcript,	processed_transcript	2.22754	1.78682	7468	100729565	100731676	2112	processed_transcript	NOVEL	RP11-305E17.6	processed_transcript	RP11-305E17.6-001	100731676	1	2716	2.00718	2716	1	1	-561	6	0.05	0.2	0.125	40	NA	NA	NA	+	0	NA	NA	NA	NA	NA	NA	NA	NA	NA	NA	0.442311538	2708	1.00517000058841	-2.08987524840739	6.5129917781068
7225	chr1	+	ENSG00000137996.8	protein_coding,	protein_coding	12.6758	16.28	7469	100731763	100758325	26563	protein_coding	KNOWN	RTCD1	protein_coding	RTCD1-001	100731763	1	2717	14.4779	2717	1	0	NA	NA	NA	NA	NA	NA	NA	NA	NA	NA	1	474	6	0.05	0.2	0.125	40	NA	NA	NA	+	0.382123575	2709	3.85578045150052	-2.04572325179673	6.97046725424472
7255	chr1	-	ENSG00000162694.9	protein_coding,	protein_coding	10.3952	9.82754	7499	101343075	101360367	17293	protein_coding	KNOWN	EXTL2	protein_coding	EXTL2-003	101360367	1	2731	10.11137	2731	1	0	NA	NA	NA	NA	NA	NA	NA	NA	NA	NA	1	920.5	4	0.148148148	0	0.185185185	27	NA	NA	NA	+	0.436712657	2723	3.33790657761805	-2.90399731441672	6.58378392437711
7259	chr1	+	ENSG00000162695.6	protein_coding,	protein_coding	13.047	11.5647	7503	101361632	101447309	85678	protein_coding	KNOWN	SLC30A7	protein_coding	SLC30A7-001	101361632	1	2732	12.30585	2732	1	0	NA	NA	NA	NA	NA	NA	NA	NA	NA	NA	0	NA	NA	NA	NA	NA	NA	NA	NA	NA	NA	0.430113977	2724	3.62127240716796	-2.48196039447747	7.17854737460442
7273	chr1	-	ENSG00000117543.13	protein_coding,protein_coding,protein_coding,	protein_coding	27.6851	24.5192	7518	101455619	101491328	35710	protein_coding	KNOWN	DPH5	protein_coding	DPH5-001	101491328	1	2736	78.30645	2736	1	2	-95|-1720	5|4	0.1|0	0.2|0.05	0.1|0.15	30|20	NA|NA	NA|NA	NA|NA	+|+	0	NA	NA	NA	NA	NA	NA	NA	NA	NA	NA	0.388322336	2728	6.29105924020402	-2.02914041825607	7.26672290459413
7401	chr1	-	ENSG00000134215.11	nonsense_mediated_decay,protein_coding,nonsense_mediated_decay,protein_coding,	protein_coding	9.81178	5.70791	7649	108115597	108231126	115530	protein_coding	KNOWN	VAV3	protein_coding	VAV3-005	108231126	1	2798	31.03938	2798	1	0	NA	NA	NA	NA	NA	NA	NA	NA	NA	NA	0	NA	NA	NA	NA	NA	NA	NA	NA	NA	NA	0.390721856	2790	4.95602783540665	-4.71024580022849	5.11887497524666
7441	chr1	+	ENSG00000134186.7	protein_coding,	protein_coding	8.48586	10.2742	7689	109234945	109244425	9481	protein_coding	KNOWN	PRPF38B	protein_coding	PRPF38B-001	109234945	1	2817	9.38003	2817	1	0	NA	NA	NA	NA	NA	NA	NA	NA	NA	NA	3	236|813|1038	4|4|4	0.192307692307692|0.178571428571429|0.0909090909090909	0|0.0357142857142857|0	0|0.107142857142857|0.136363636363636	26|28|22	NA|4|NA	NA|5|NA	NA|2|NA	-|+|+	0.410517896	2809	3.22959253689652	-1.45957197675334	6.30104632199205
7450	chr1	+	ENSG00000116266.6	retained_intron,	protein_coding	36.7544	43.5787	7699	109289304	109295823	6520	protein_coding	KNOWN	STXBP3	retained_intron	STXBP3-002	109289304	1	2820	40.16655	2820	1	0	NA	NA	NA	NA	NA	NA	NA	NA	NA	NA	2	294|404	4|6	0.0909090909090909|0.15	0.136363636363636|0.3	0.0909090909090909|0.025	22|40	NA|NA	NA|NA	NA|NA	+|-	0.441311738	2812	5.32792264510219	-1.4639430657911	7.18284328238312
7467	chr1	+	ENSG00000121957.7	protein_coding,protein_coding,	protein_coding	3.7656	2.53134	7716	109419603	109473043	53441	protein_coding	KNOWN	GPSM2	protein_coding	GPSM2-201	109419603	1	2826	6.29694	2826	1	0	NA	NA	NA	NA	NA	NA	NA	NA	NA	NA	2	231|405.5	4|5	0|0.027027027027027	0.277777777777778|0.216216216216216	0.0555555555555556|0.162162162162162	18|37	1|NA	1|NA	4|NA	-|+	0.450109978	2818	2.65465092078701	-0.741056664940975	6.23171670643914
7493	chr1	+	ENSG00000215717.4	processed_transcript,	protein_coding	26.2531	24.2214	7743	109633402	109637611	4210	protein_coding	KNOWN	TMEM167B	processed_transcript	TMEM167B-002	109633402	1	2836	25.23725	2836	1	0	NA	NA	NA	NA	NA	NA	NA	NA	NA	NA	1	202.5	5	0.037037037	0.148148148	0.037037037	27	NA	NA	NA	-	0.481703659	2828	4.65748280918917	-3.22700295845616	5.65342718831642
7518	chr1	+	ENSG00000031698.8	processed_transcript,	protein_coding	234.899	284.105	7768	109756554	109757775	1222	protein_coding	KNOWN	SARS	processed_transcript	SARS-002	109756554	1	2844	259.502	2844	1	1	-124	7	0.119047619	0.095238095	0.071428571	42	NA	NA	NA	-	0	NA	NA	NA	NA	NA	NA	NA	NA	NA	NA	0.465706859	2836	8.01960184735196	-1.43361926520311	6.96868990994328
7531	chr1	-	ENSG00000134222.11	protein_coding,protein_coding,protein_coding,	protein_coding	20.8964	14.7413	7781	109822207	109825744	3538	protein_coding	KNOWN	PSRC1	protein_coding	PSRC1-201	109825744	1	2846	53.45655	2846	1	0	NA	NA	NA	NA	NA	NA	NA	NA	NA	NA	0	NA	NA	NA	NA	NA	NA	NA	NA	NA	NA	0.476704659	2838	5.74029482624873	-1.12280232180164	6.60344248579097
7540	chr1	-	ENSG00000221986.2	protein_coding,	protein_coding	2.12147	2.13426	7790	109834987	109849663	14677	protein_coding	KNOWN	MYBPHL	protein_coding	MYBPHL-001	109849663	1	2847	2.127865	2847	1	0	NA	NA	NA	NA	NA	NA	NA	NA	NA	NA	1	229	6	0.083333333	0.055555556	0.138888889	36	NA	NA	NA	-	0.467506499	2839	1.08940662357939	-3.0806858831748	4.23502301565972
7547	chr1	-	ENSG00000134243.7	protein_coding,	protein_coding	16.1762	19.6551	7797	109852192	109940573	88382	protein_coding	KNOWN	SORT1	protein_coding	SORT1-001	109940573	1	2848	17.91565	2848	1	1	-218.5	4	0.103448276	0.275862069	0	29	3	7	6	-	4	522.5|471|429.5|14	5|4|6|4	0.037037037037037|0.0714285714285714|0.102564102564103|0	0.259259259259259|0.214285714285714|0.256410256410256|0.227272727272727	0.037037037037037|0.0357142857142857|0.0256410256410256|0.0454545454545455	27|28|39|22	NA|4|NA|1	NA|7|NA|1	NA|2|NA|6	-|+|+|-	0.403519296	2840	4.16314848198974	-1.63710484931183	4.82938319851398
7555	chr1	+	ENSG00000143028.7	protein_coding,	protein_coding	0	0.049634	7805	110009180	110022410	13231	protein_coding	KNOWN	SYPL2	protein_coding	SYPL2-201	110009180	1	2852	0.024817	2852	1	3	-1309.5|-127|-42.5	7|3|5	0.317073170731707|0.05|0.161290322580645	0.024390243902439|0.2|0.0967741935483871	0.0731707317073171|0.05|0.0645161290322581	41|20|31	NA|NA|NA	NA|NA|NA	NA|NA|NA	-|-|+	2	465.5|722	4|5	0.103448275862069|0.0416666666666667	0.172413793103448|0.125	0.103448275862069|0.0416666666666667	29|24	NA|NA	NA|NA	NA|NA	-|+	0.428114377	2844	-5.33252746377914	-2.88149670439302	3.27088889540885
7568	chr1	+	ENSG00000174151.9	protein_coding,protein_coding,	protein_coding	1.69717	3.77219	7818	110036722	110041477	4756	protein_coding	KNOWN	CYB561D1	protein_coding	CYB561D1-001	110036722	1	2854	5.46936	2854	1	1	-144	4	0.033333333	0.333333333	0.133333333	30	7	3	7	+	2	328|372.5	5|4	0.0833333333333333|0.0740740740740741	0.194444444444444|0.037037037037037	0.166666666666667|0.259259259259259	36|27	NA|NA	NA|NA	NA|NA	+|+	0.558888222	2846	2.45137202518497	-1.39024123123539	4.82629464446553
7579	chr1	+	ENSG00000065135.7	protein_coding,	protein_coding	96.6328	97.1338	7829	110091233	110136975	45743	protein_coding	KNOWN	GNAI3	protein_coding	GNAI3-001	110091233	1	2859	96.8833	2859	1	0	NA	NA	NA	NA	NA	NA	NA	NA	NA	NA	2	347|412	6|4	0.0476190476190476|0	0.142857142857143|0.0384615384615385	0.166666666666667|0.269230769230769	42|26	NA|NA	NA|NA	NA|NA	+|+	0.470305939	2851	6.59817610125478	-1.91266752941536	6.59199661784206
7613	chr1	+	ENSG00000168765.10	processed_transcript,	protein_coding	25.1394	22.5338	7865	110198739	110200293	1555	protein_coding	KNOWN	GSTM4	processed_transcript	GSTM4-005	110198739	1	2869	23.8366	2869	1	1	-1457	4	0.192307692	0.076923077	0.115384615	26	NA	NA	NA	-	3	160|342.5|1046	4|4|6	0.0769230769230769|0.0476190476190476|0.111111111111111	0.230769230769231|0.238095238095238|0.194444444444444	0|0.0476190476190476|0.111111111111111	26|21|36	NA|3|NA	NA|5|NA	NA|1|NA	+|+|+	0.438512298	2861	4.57510656252665	-2.26603137235607	5.80952783400216
7626	chr1	+	ENSG00000213366.5	protein_coding,retained_intron,	protein_coding	5.03848	4.86413	7878	110210679	110245064	34386	protein_coding	KNOWN	GSTM2	protein_coding	GSTM2-202	110210679	1	2870	9.90261	2870	1	2	-1580.5|-53.5	4|5	0.217391304347826|0.037037037037037	0.0434782608695652|0.185185185185185	0.173913043478261|0.037037037037037	23|27	4|NA	2|NA	5|NA	-|+	3	117|253|1546.5	7|4|8	0.0576923076923077|0|0.226415094339623	0.173076923076923|0.136363636363636|0.0377358490566038	0.115384615384615|0.0909090909090909|0.0943396226415094	52|22|53	NA|NA|NA	NA|NA|NA	NA|NA|NA	+|+|-	0.450309938	2862	3.30780882193884	-2.30685166607597	3.67007075876026
7667	chr1	-	ENSG00000198758.6	protein_coding,	protein_coding	16.9187	15.3369	7919	110292702	110306546	13845	protein_coding	KNOWN	EPS8L3	protein_coding	EPS8L3-003	110306546	1	2877	16.1278	2877	1	3	-843|-1376|-1428.5	5|4|5	0.147058823529412|0.192307692307692|0.102564102564103	0.117647058823529|0.115384615384615|0.179487179487179	0|0.115384615384615|0.128205128205128	34|26|39	NA|1|NA	NA|6|NA	NA|6|NA	+|-|+	5	1932.5|1522|1443|641.5|558	5|4|4|4|4	0.2|0.115384615384615|0.0909090909090909|0.111111111111111|0.142857142857143	0.08|0.115384615384615|0.181818181818182|0.037037037037037|0.107142857142857	0.08|0.153846153846154|0.136363636363636|0.111111111111111|0.107142857142857	25|26|22|27|28	NA|NA|6|NA|NA	NA|NA|2|NA|NA	NA|NA|1|NA|NA	+|-|-|-|-	0.557288542	2869	4.0114777481634	-1.506758429419	6.62220422921469
7677	chr1	+	ENSG00000184371.9	protein_coding,	protein_coding	6.73565	12.0114	7929	110453492	110466221	12730	protein_coding	KNOWN	CSF1	protein_coding	CSF1-005	110453492	1	2881	9.373525	2881	1	2	-310|-187.5	4|4	0.125|0.0869565217391304	0.125|0.0434782608695652	0.0416666666666667|0.0434782608695652	24|23	NA|NA	NA|NA	NA|NA	+|+	1	226	5	0.038461538	0.230769231	0.038461538	26	NA	NA	NA	+	0.5024995	2873	3.22859168861816	-2.93897312191982	4.16485128607286
7727	chr1	-	ENSG00000134248.8	protein_coding,	protein_coding	139.274	163.792	7981	110943871	110950290	6420	protein_coding	KNOWN	HBXIP	protein_coding	HBXIP-004	110950290	1	2899	151.533	2899	1	0	NA	NA	NA	NA	NA	NA	NA	NA	NA	NA	0	NA	NA	NA	NA	NA	NA	NA	NA	NA	NA	0.466706659	2891	7.24348819965757	-1.81806545692848	7.35683053862232
7765	chr1	+	ENSG00000134255.9	processed_transcript,protein_coding,	protein_coding	0.106073	0.099268	8019	111682249	111727430	45182	protein_coding	KNOWN	CEPT1	processed_transcript	CEPT1-004	111682249	1	2917	0.205341	2917	1	0	NA	NA	NA	NA	NA	NA	NA	NA	NA	NA	1	192	6	0.02173913	0.152173913	0.152173913	46	NA	NA	NA	-	0.400919816	2909	-2.28390637883366	-3.34811843571679	6.1214217775615
7767	chr1	-	ENSG00000156171.9	processed_transcript,	protein_coding	2.1745	1.83646	8021	111663138	111682318	19181	protein_coding	KNOWN	DRAM2	processed_transcript	DRAM2-010	111682318	1	2918	2.00548	2918	1	1	-123	6	0.02173913	0.152173913	0.152173913	46	NA	NA	NA	-	0	NA	NA	NA	NA	NA	NA	NA	NA	NA	NA	0.440111978	2910	1.00394757869558	-3.0162376840712	6.08887106204202
7768	chr1	+	ENSG00000134255.9	processed_transcript,	protein_coding	0	0.049634	8022	111682356	111703818	21463	protein_coding	KNOWN	CEPT1	processed_transcript	CEPT1-007	111682356	1	2919	0.024817	2919	1	0	NA	NA	NA	NA	NA	NA	NA	NA	NA	NA	1	85	6	0.02173913	0.152173913	0.152173913	46	NA	NA	NA	-	0.408518296	2911	-5.33252746377914	-3.05647917722984	6.58232729883911
7799	chr1	+	ENSG00000064886.8	protein_coding,	protein_coding	0.212147	0.099268	8053	111772375	111778770	6396	protein_coding	KNOWN	CHI3L2	protein_coding	CHI3L2-009	111772375	1	2925	0.1557075	2925	1	0	NA	NA	NA	NA	NA	NA	NA	NA	NA	NA	0	NA	NA	NA	NA	NA	NA	NA	NA	NA	NA	0.450309938	2917	-2.68308965816333	-5.48029301425893	2.38084247388611
7821	chr1	+	ENSG00000173947.9	processed_transcript,	protein_coding	0.0530366	0.148902	8077	111889222	111895635	6414	protein_coding	KNOWN	C1orf88	processed_transcript	C1orf88-002	111889222	1	2931	0.1009693	2931	1	0	NA	NA	NA	NA	NA	NA	NA	NA	NA	NA	1	119	5	0.1875	0.0625	0.09375	32	NA	NA	NA	+	0.392521496	2923	-3.30801139072648	-1.89915152345265	3.82301643847679
7838	chr1	-	ENSG00000116455.9	processed_transcript,	protein_coding	0.265183	0.198536	8094	111983920	111990154	6235	protein_coding	KNOWN	WDR77	processed_transcript	WDR77-003	111990154	1	2939	0.2318595	2939	1	3	-1444|-1479|-1609	5|5|4	0.0909090909090909|0.1|0.0666666666666667	0.0909090909090909|0.2|0.2	0.0909090909090909|0.0666666666666667|0.0666666666666667	22|30|30	NA|NA|NA	NA|NA|NA	NA|NA|NA	+|+|+	0	NA	NA	NA	NA	NA	NA	NA	NA	NA	NA	0.462107578	2931	-2.10867725529114	-5.71778079634229	5.02486962470112
7840	chr1	-	ENSG00000116455.9	processed_transcript,	protein_coding	2.12147	1.73719	8097	111985971	111991513	5543	protein_coding	KNOWN	WDR77	processed_transcript	WDR77-002	111991513	1	2941	1.92933	2941	1	5	-85|-120|-250|-759|-834.5	5|5|4|4|5	0.0909090909090909|0.1|0.0666666666666667|0.25|0.2	0.0909090909090909|0.2|0.2|0.0416666666666667|0.0857142857142857	0.0909090909090909|0.0666666666666667|0.0666666666666667|0.0416666666666667|0.114285714285714	22|30|30|24|35	NA|NA|NA|NA|NA	NA|NA|NA|NA|NA	NA|NA|NA|NA|NA	+|+|+|+|+	0	NA	NA	NA	NA	NA	NA	NA	NA	NA	NA	0.438912218	2933	0.94809992858406	-3.30185614940746	6.35015079983318
7842	chr1	-	ENSG00000116455.9	protein_coding,	protein_coding	80.6157	69.4876	8099	111983796	111991874	8079	protein_coding	KNOWN	WDR77	protein_coding	WDR77-201	111991874	1	2943	75.05165	2943	1	2	-398|-473.5	4|5	0.25|0.2	0.0416666666666667|0.0857142857142857	0.0416666666666667|0.114285714285714	24|35	NA|NA	NA|NA	NA|NA	+|+	3	276|241|111	5|5|4	0.0909090909090909|0.1|0.0666666666666667	0.0909090909090909|0.2|0.2	0.0909090909090909|0.0666666666666667|0.0666666666666667	22|30|30	NA|NA|NA	NA|NA|NA	NA|NA|NA	+|+|+	0.418116377	2935	6.22981188453013	-1.78090393645351	6.3980631834256
7920	chr1	-	ENSG00000007341.12	processed_transcript,processed_transcript,	protein_coding	4.7733	4.5167	8179	113153077	113161733	8657	protein_coding	KNOWN	ST7L	processed_transcript	ST7L-019	113161733	1	2974	9.29	2974	1	0	NA	NA	NA	NA	NA	NA	NA	NA	NA	NA	1	110	4	0.041666667	0.208333333	0.083333333	24	NA	NA	NA	-	0.450709858	2966	3.21567859660793	-2.86458595552472	6.9565307528486
7927	chr1	+	ENSG00000116489.8	protein_coding,	protein_coding	1.48503	1.29048	8186	113161795	113214241	52447	protein_coding	KNOWN	CAPZA1	protein_coding	CAPZA1-001	113161795	1	2975	1.387755	2975	1	1	-172	4	0.041666667	0.208333333	0.083333333	24	NA	NA	NA	-	0	NA	NA	NA	NA	NA	NA	NA	NA	NA	NA	0.414917017	2967	0.47275289105461	-2.71879677870247	7.15421463397324
7930	chr1	-	ENSG00000007341.12	processed_transcript,	protein_coding	1.11377	1.53865	8189	113140644	113162286	21643	protein_coding	KNOWN	ST7L	processed_transcript	ST7L-015	113162286	1	2976	1.32621	2976	1	0	NA	NA	NA	NA	NA	NA	NA	NA	NA	NA	1	663	4	0.041666667	0.208333333	0.083333333	24	NA	NA	NA	-	0.435712857	2968	0.407309238475088	-2.01216402941554	7.14511090720829
7935	chr1	+	ENSG00000116489.8	processed_transcript,	protein_coding	183.878	156.695	8194	113162427	113192635	30209	protein_coding	KNOWN	CAPZA1	processed_transcript	CAPZA1-002	113162427	1	2977	170.2865	2977	1	1	-804	4	0.041666667	0.208333333	0.083333333	24	NA	NA	NA	-	0	NA	NA	NA	NA	NA	NA	NA	NA	NA	NA	0.439712058	2969	7.41182025511967	-2.04751136991721	7.82429693945373
7941	chr1	+	ENSG00000238975.1	snoRNA,	snoRNA	0.106073	0	8200	113195210	113195310	101	snoRNA	NOVEL	snoU13.331	snoRNA	snoU13.331-201	113195210	1	2981	0.0530365	2981	1	0	NA	NA	NA	NA	NA	NA	NA	NA	NA	NA	0	NA	NA	NA	NA	NA	NA	NA	NA	NA	NA	0.381723655	2973	-4.23687061793002	-5.67292888626018	2.21259258970945
7948	chr1	+	ENSG00000155363.12	processed_transcript,protein_coding,	protein_coding	23.3361	24.0725	8207	113217316	113243357	26042	protein_coding	KNOWN	MOV10	protein_coding	MOV10-201	113217316	1	2983	47.4086	2983	1	2	-436.5|-59	4|7	0.263157894736842|0.166666666666667	0.0526315789473684|0.0952380952380952	0|0.0952380952380952	19|42	1|NA	1|NA	4|NA	-|+	0	NA	NA	NA	NA	NA	NA	NA	NA	NA	NA	0.405318936	2975	5.56707688506453	-3.02325807829247	7.05784888114309
7963	chr1	+	ENSG00000155363.12	processed_transcript,	protein_coding	0.212147	0.446706	8222	113242309	113243347	1039	protein_coding	KNOWN	MOV10	processed_transcript	MOV10-018	113242309	1	2985	0.3294265	2985	1	4	-1541.5|-1453.5|-801.5|-343	5|6|4|4	0.206896551724138|0.258064516129032|0.0952380952380952|0.0833333333333333	0.0689655172413793|0|0.0952380952380952|0.208333333333333	0.103448275862069|0.129032258064516|0.0952380952380952|0.125	29|31|21|24	NA|NA|NA|3	NA|NA|NA|3	NA|NA|NA|4	-|+|-|+	0	NA	NA	NA	NA	NA	NA	NA	NA	NA	NA	0.538092382	2977	-1.60197148068278	-4.89965200348492	4.20273179489202
8011	chr1	-	ENSG00000238198.1	processed_transcript,	lincRNA	0.371256	0.297804	8270	113554309	113615727	61419	lincRNA	NOVEL	RP11-31F15.2	processed_transcript	RP11-31F15.2-001	113615727	1	3001	0.33453	3001	1	1	-1819	6	0.166666667	0.083333333	0.027777778	36	NA	NA	NA	+	0	NA	NA	NA	NA	NA	NA	NA	NA	NA	NA	0.455508898	2993	-1.57979250013274	-1.74709516426161	5.12345136006762
8012	chr1	+	ENSG00000198799.6	protein_coding,	protein_coding	10.2891	10.2246	8271	113615831	113667824	51994	protein_coding	KNOWN	LRIG2	protein_coding	LRIG2-001	113615831	1	3002	10.25685	3002	1	0	NA	NA	NA	NA	NA	NA	NA	NA	NA	NA	1	1715	6	0.166666667	0.083333333	0.027777778	36	NA	NA	NA	+	0.575884823	2994	3.35851582513636	-1.76023052737117	6.60730676086536
8080	chr1	-	ENSG00000235527.2	processed_transcript,	lincRNA	0.15911	0.148902	8341	114466623	114471880	5258	lincRNA	NOVEL	RP5-1073O3.7	processed_transcript	RP5-1073O3.7-001	114471880	1	3026	0.154006	3026	1	2	-558|-1569.5	4|4	0|0.206896551724138	0.25|0.0344827586206897	0|0.0689655172413793	24|29	NA|7	NA|2	NA|4	+|+	0	NA	NA	NA	NA	NA	NA	NA	NA	NA	NA	0.471705659	3018	-2.69894153616444	-3.36288502457301	6.35572826153005
8082	chr1	+	ENSG00000163349.15	protein_coding,protein_coding,protein_coding,	protein_coding	0.15911	0	8343	114471996	114520422	48427	protein_coding	KNOWN	HIPK1	protein_coding	HIPK1-004	114471996	1	3027	0.238665	3027	1	0	NA	NA	NA	NA	NA	NA	NA	NA	NA	NA	2	442|1453.5	4|4	0|0.206896551724138	0.25|0.0344827586206897	0|0.0689655172413793	24|29	NA|7	NA|2	NA|4	+|+	0.435512897	3019	-2.0669410828402	-3.31041812077003	3.93500780754101
8092	chr1	+	ENSG00000116774.7	protein_coding,	protein_coding	3.97775	3.62328	8354	114522065	114524876	2812	protein_coding	KNOWN	OLFML3	protein_coding	OLFML3-011	114522065	1	3030	3.800515	3030	1	0	NA	NA	NA	NA	NA	NA	NA	NA	NA	NA	0	NA	NA	NA	NA	NA	NA	NA	NA	NA	NA	0.397320536	3022	1.92619492845185	-2.77594984829559	3.71242058773125
8112	chr1	-	ENSG00000116752.5	processed_transcript,	protein_coding	72.8193	63.7797	8375	115110505	115124250	13746	protein_coding	KNOWN	BCAS2	processed_transcript	BCAS2-002	115124250	1	3041	68.2995	3041	1	0	NA	NA	NA	NA	NA	NA	NA	NA	NA	NA	0	NA	NA	NA	NA	NA	NA	NA	NA	NA	NA	0.412117576	3033	6.09380311190696	-1.9545514228697	7.17050204154262
8128	chr1	-	ENSG00000009307.11	retained_intron,	protein_coding	3.44738	2.03499	8392	115262837	115268969	6133	protein_coding	KNOWN	CSDE1	retained_intron	CSDE1-006	115268969	1	3047	2.741185	3047	1	0	NA	NA	NA	NA	NA	NA	NA	NA	NA	NA	0	NA	NA	NA	NA	NA	NA	NA	NA	NA	NA	0.359928014	3039	1.45479969758215	-5.68772512893801	2.40718221709112
8137	chr1	-	ENSG00000009307.11	processed_transcript,processed_transcript,protein_coding,protein_coding,	protein_coding	348.398	327.287	8401	115292442	115300608	8167	protein_coding	KNOWN	CSDE1	processed_transcript	CSDE1-011	115300608	1	3049	1351.37	3049	1	0	NA	NA	NA	NA	NA	NA	NA	NA	NA	NA	1	1927	4	0.392857143	0	0.071428571	28	4	7	4	+	0.380123975	3041	10.4002070178621	-1.71927642839394	8.86813736325261
8149	chr1	-	ENSG00000052723.7	protein_coding,processed_transcript,	protein_coding	100.027	83.2363	8413	115312100	115323306	11207	protein_coding	KNOWN	SIKE1	protein_coding	SIKE1-002	115323306	1	3050	183.2633	3050	1	0	NA	NA	NA	NA	NA	NA	NA	NA	NA	NA	0	NA	NA	NA	NA	NA	NA	NA	NA	NA	NA	0.408318336	3042	7.51777409289652	-2.72832565579102	6.25615032150629
8175	chr1	+	ENSG00000173218.9	protein_coding,	protein_coding	2.22754	2.13426	8440	116184612	116236312	51701	protein_coding	KNOWN	VANGL1	protein_coding	VANGL1-001	116184612	1	3063	2.1809	3063	1	1	-61.5	6	0.024390244	0.292682927	0.097560976	41	NA	NA	NA	+	1	195	5	0.157894737	0.184210526	0.026315789	38	NA	NA	NA	-	0.478904219	3055	1.12492362013382	-1.99596035211639	5.41635365705592
8196	chr1	+	ENSG00000235933.1	processed_transcript,	processed_transcript	0.265183	0.198536	8461	116706905	116708862	1958	processed_transcript	NOVEL	RP5-1185H19.2	processed_transcript	RP5-1185H19.2-001	116706905	1	3072	0.2318595	3072	1	0	NA	NA	NA	NA	NA	NA	NA	NA	NA	NA	0	NA	NA	NA	NA	NA	NA	NA	NA	NA	NA	0.426714657	3064	-2.10867725529114	-4.08311674392588	3.83758079899
8200	chr1	+	ENSG00000163399.10	protein_coding,protein_coding,	protein_coding	148.184	168.805	8465	116915882	116947396	31515	protein_coding	KNOWN	ATP1A1	protein_coding	ATP1A1-001	116915882	1	3075	316.989	3075	1	2	-314|-146.5	6|5	0.157894736842105|0.0344827586206897	0.131578947368421|0.172413793103448	0.0789473684210526|0.137931034482759	38|29	NA|NA	NA|NA	NA|NA	+|+	2	125|587	7|4	0.105263157894737|0.142857142857143	0.157894736842105|0.178571428571429	0.0789473684210526|0.0357142857142857	38|28	NA|NA	NA|NA	NA|NA	-|+	0.470705859	3067	8.30828896729778	-1.94674407255636	6.35813613043514
8214	chr1	-	ENSG00000203865.4	processed_transcript,	protein_coding	1.90932	2.3328	8480	116941622	116961197	19576	protein_coding	KNOWN	ATP1A1OS	processed_transcript	ATP1A1OS-003	116961197	1	3079	2.12106	3079	1	1	-1195.5	2	0.052631579	0	0.052631579	19	NA	NA	NA	-	0	NA	NA	NA	NA	NA	NA	NA	NA	NA	NA	0.454509098	3071	1.08478543203213	-2.75924851475353	7.75817526271491
8218	chr1	-	ENSG00000233154.1	processed_transcript,	processed_transcript	0.212147	0.198536	8484	117006343	117009074	2732	processed_transcript	NOVEL	RP4-655J12.4	processed_transcript	RP4-655J12.4-006	117009074	1	3082	0.2053415	3082	1	0	NA	NA	NA	NA	NA	NA	NA	NA	NA	NA	0	NA	NA	NA	NA	NA	NA	NA	NA	NA	NA	0.397720456	3074	-2.28390286591299	-4.9657391740968	5.63830582577682
8243	chr1	+	ENSG00000134247.8	protein_coding,	protein_coding	0.63644	0.099268	8509	117452679	117532980	80302	protein_coding	KNOWN	PTGFRN	protein_coding	PTGFRN-001	117452679	1	3097	0.367854	3097	1	2	-1355.5|-295.5	4|5	0.103448275862069|0.121212121212121	0.103448275862069|0.121212121212121	0|0.0909090909090909	29|33	NA|NA	NA|NA	NA|NA	-|+	1	964.5	4	0.047619048	0.095238095	0.095238095	21	NA	NA	NA	-	0.462707459	3089	-1.44279481575262	-2.66290772665185	3.37306461726166
8253	chr1	-	ENSG00000236137.1	processed_transcript,	processed_transcript	0	0.099268	8519	117568104	117602112	34009	processed_transcript	NOVEL	RP11-27K13.3	processed_transcript	RP11-27K13.3-001	117602112	1	3103	0.049634	3103	1	0	NA	NA	NA	NA	NA	NA	NA	NA	NA	NA	0	NA	NA	NA	NA	NA	NA	NA	NA	NA	NA	0.431313737	3095	-4.33252746377914	-4.02324633044084	4.47744471279837
8296	chr1	+	ENSG00000065183.10	processed_transcript,	protein_coding	23.7074	25.7104	8567	118472398	118481152	8755	protein_coding	KNOWN	WDR3	processed_transcript	WDR3-003	118472398	1	3121	24.7089	3121	1	1	-365	5	0.15625	0.125	0	32	NA	NA	NA	-	0	NA	NA	NA	NA	NA	NA	NA	NA	NA	NA	0.401319736	3113	4.62695888054924	-2.10469115120167	6.97520838983902
8319	chr1	-	ENSG00000223575.1	processed_pseudogene,	pseudogene	0.265183	0.24817	8592	119627531	119628577	1047	pseudogene	KNOWN	RP4-610L12.2	processed_pseudogene	RP4-610L12.2-001	119628577	1	3132	0.2566765	3132	1	0	NA	NA	NA	NA	NA	NA	NA	NA	NA	NA	0	NA	NA	NA	NA	NA	NA	NA	NA	NA	NA	0.408918216	3124	-1.961976878777	-5.93007235562513	2.55709341700269
8324	chr1	-	ENSG00000116874.7	processed_transcript,	protein_coding	15.6988	13.2523	8597	119682271	119683261	991	protein_coding	KNOWN	WARS2	processed_transcript	WARS2-003	119683261	1	3136	14.47555	3136	1	0	NA	NA	NA	NA	NA	NA	NA	NA	NA	NA	0	NA	NA	NA	NA	NA	NA	NA	NA	NA	NA	0.403919216	3128	3.85554625948862	-2.184418009513	6.61450974662548
8329	chr1	+	ENSG00000231365.1	processed_transcript,processed_transcript,	processed_transcript	0.265183	0.198536	8602	119683353	119776804	93452	processed_transcript	NOVEL	RP11-418J17.1	processed_transcript	RP11-418J17.1-004	119683353	1	3137	0.463719	3137	1	0	NA	NA	NA	NA	NA	NA	NA	NA	NA	NA	0	NA	NA	NA	NA	NA	NA	NA	NA	NA	NA	0.377724455	3129	-1.10867725529114	-2.18376238445996	6.90910592343647
8333	chr1	-	ENSG00000227712.1	processed_transcript,	processed_transcript	0.15911	0.198536	8606	119802888	119869926	67039	processed_transcript	NOVEL	RP11-418J17.3	processed_transcript	RP11-418J17.3-001	119869926	1	3140	0.178823	3140	1	2	-16|-73.5	4|8	0.125|0.0677966101694915	0.125|0.152542372881356	0.125|0.0508474576271186	24|59	7|NA	1|NA	3|NA	-|-	0	NA	NA	NA	NA	NA	NA	NA	NA	NA	NA	0.467906419	3132	-2.48339578872444	-2.54287012971628	5.15333553533226
8371	chr1	+	ENSG00000092621.6	processed_transcript,	protein_coding	51.8698	54.4485	8644	120254529	120272694	18166	protein_coding	KNOWN	PHGDH	processed_transcript	PHGDH-005	120254529	1	3161	53.15915	3161	1	1	-641.5	4	0.086956522	0	0.043478261	23	NA	NA	NA	-	3	781|963.5|1960.5	4|4|5	0|0.08|0.185185185185185	0.0714285714285714|0.16|0	0.107142857142857|0.04|0.111111111111111	28|25|27	NA|NA|NA	NA|NA|NA	NA|NA|NA	+|+|+	0.402119576	3153	5.73224613139406	-2.10345064343208	6.67128216883953
8399	chr1	-	ENSG00000134250.11	protein_coding,	protein_coding	1.48503	2.3328	8672	120454176	120612240	158065	protein_coding	KNOWN	NOTCH2	protein_coding	NOTCH2-001	120612240	1	3171	1.908915	3171	1	1	-296	4	0.038461538	0.038461538	0.115384615	26	NA	NA	NA	+	1	1109	4	0.05	0.15	0.05	20	NA	NA	NA	-	0.422315537	3163	0.932752863973572	-0.998555158886909	5.99159006790687
8403	chr1	-	ENSG00000236933.1	processed_transcript,	processed_transcript	0.371256	0.049634	8676	120835810	120838343	2534	processed_transcript	PUTATIVE	RP11-439A17.7	processed_transcript	RP11-439A17.7-001	120838343	1	3174	0.210445	3174	1	0	NA	NA	NA	NA	NA	NA	NA	NA	NA	NA	4	1583|1181|615|225.5	6|4|5|4	0.0625|0.136363636363636|0.0357142857142857|0.173913043478261	0.25|0.0454545454545455|0.178571428571429|0.0869565217391304	0.145833333333333|0.272727272727273|0.0714285714285714|0.0434782608695652	48|22|28|23	NA|3|NA|NA	NA|1|NA|NA	NA|6|NA|NA	-|-|+|-	0.427314537	3166	-2.24848486204801	-4.93452145325866	6.02316679076518
8432	chr1	+	ENSG00000231752.1	unprocessed_pseudogene,	pseudogene	0.31822	0.49634	8705	121261143	121310591	49449	pseudogene	KNOWN	EMBP1	unprocessed_pseudogene	EMBP1-001	121261143	1	3190	0.40728	3190	1	0	NA	NA	NA	NA	NA	NA	NA	NA	NA	NA	1	137.5	6	0.181818182	0.121212121	0.060606061	33	NA	NA	NA	+	0.395520896	3182	-1.29590712417299	-3.84682244143115	4.71158346974131
8436	chr1	+	ENSG00000230880.1	processed_transcript,	lincRNA	0.106073	0	8709	142618766	142621059	2294	lincRNA	NOVEL	AL583842.3	processed_transcript	AL583842.3-006	142618766	1	3194	0.0530365	3194	1	0	NA	NA	NA	NA	NA	NA	NA	NA	NA	NA	0	NA	NA	NA	NA	NA	NA	NA	NA	NA	NA	0.400319936	3186	-4.23687061793002	-5.25423428132905	5.20197914989796
8576	chr1	+	ENSG00000201699.1	snRNA,	snRNA	0.424293	0.198536	8849	144534038	144534199	162	snRNA	KNOWN	U1.50	snRNA	U1.50-201	144534038	1	3252	0.3114145	3252	1	2	-374|-79.5	4|4	0.166666666666667|0.0740740740740741	0.0555555555555556|0.111111111111111	0.0555555555555556|0.0740740740740741	18|27	NA|NA	NA|NA	NA|NA	+|+	0	NA	NA	NA	NA	NA	NA	NA	NA	NA	NA	0.455508898	3244	-1.68309197451964	-4.12278030395258	6.2133629913817
8579	chr1	+	ENSG00000225241.2	processed_transcript,	processed_transcript	0.371256	0.545974	8852	144593720	144605701	11982	processed_transcript	NOVEL	NBPF8	processed_transcript	NBPF8-009	144593720	1	3253	0.458615	3253	1	0	NA	NA	NA	NA	NA	NA	NA	NA	NA	NA	2	331.5|539.5	5|4	0.0689655172413793|0.0476190476190476	0.0689655172413793|0.0952380952380952	0.103448275862069|0.142857142857143	29|21	NA|NA	NA|NA	NA|NA	+|-	0.454709058	3245	-1.12464455272114	-2.38608363745885	5.6773506130331
8611	chr1	-	ENSG00000178104.13	processed_transcript,	protein_coding	0.15911	0.049634	8884	144836186	144854571	18386	protein_coding	KNOWN	PDE4DIP	processed_transcript	PDE4DIP-029	144854571	1	3259	0.104372	3259	1	2	-800|-957.5	4|4	0.166666666666667|0.148148148148148	0.0833333333333333|0.0740740740740741	0.125|0.111111111111111	24|27	NA|NA	NA|NA	NA|NA	+|+	1	585	4	0.1	0	0.15	20	1	1	4	+	0.459508098	3251	-3.26019336458042	-5.34513919407605	2.5845796679518
8633	chr1	-	ENSG00000178104.13	protein_coding,	protein_coding	3.02309	2.53134	8908	144890594	144932365	41772	protein_coding	KNOWN	PDE4DIP	protein_coding	PDE4DIP-006	144932365	1	3263	2.777215	3263	1	0	NA	NA	NA	NA	NA	NA	NA	NA	NA	NA	0	NA	NA	NA	NA	NA	NA	NA	NA	NA	NA	0.391321736	3255	1.47363886870415	-2.27298746563987	5.14442202670659
8671	chr1	+	ENSG00000213240.6	protein_coding,protein_coding,	protein_coding	3.81864	3.47438	8947	145209119	145291654	82536	protein_coding	KNOWN	NOTCH2NL	protein_coding	NOTCH2NL-001	145209119	1	3271	7.29302	3271	1	1	-271	4	0.038461538	0.038461538	0.115384615	26	NA	NA	NA	-	1	1173	4	0.05	0.15	0.05	20	NA	NA	NA	+	0.422915417	3263	2.86651635046532	-2.17136188980676	5.93573333452877
8672	chr1	+	ENSG00000255168.1	nonsense_mediated_decay,	protein_coding	3.81864	3.47438	8948	145209145	145319796	110652	protein_coding	NOVEL	RP11-458D21.5	nonsense_mediated_decay	RP11-458D21.5-001	145209145	1	3272	3.64651	3272	1	1	-297	4	0.038461538	0.038461538	0.115384615	26	NA	NA	NA	-	1	1147	4	0.05	0.15	0.05	20	NA	NA	NA	+	0.423715257	3264	1.86651635046532	-2.39820085969075	5.99603633250032
8687	chr1	-	ENSG00000233396.1	processed_transcript,	processed_transcript	1.53806	1.58829	8963	145376327	145382362	6036	processed_transcript	NOVEL	RP11-458D21.1	processed_transcript	RP11-458D21.1-002	145382362	1	3279	1.563175	3279	1	1	-307.5	5	0.076923077	0.102564103	0.102564103	39	NA	NA	NA	+	0	NA	NA	NA	NA	NA	NA	NA	NA	NA	NA	0.465306939	3271	0.644479299450387	-2.38081425038743	3.97276691463645
8694	chr1	+	ENSG00000117289.7	processed_transcript,	protein_coding	31.4507	52.5128	8970	145438511	145442592	4082	protein_coding	KNOWN	TXNIP	processed_transcript	TXNIP-005	145438511	1	3282	41.98175	3282	1	0	NA	NA	NA	NA	NA	NA	NA	NA	NA	NA	1	1682	5	0.166666667	0.1	0.166666667	30	NA	NA	NA	+	0.464507099	3274	5.39169040119584	-2.24331142516619	7.79443411200866
8699	chr1	-	ENSG00000121851.8	protein_coding,protein_coding,	protein_coding	46.5131	48.0457	8975	145456514	145470387	13874	protein_coding	KNOWN	POLR3GL	protein_coding	POLR3GL-004	145470387	1	3283	94.5588	3283	1	0	NA	NA	NA	NA	NA	NA	NA	NA	NA	NA	0	NA	NA	NA	NA	NA	NA	NA	NA	NA	NA	0.564487103	3275	6.56313982197394	-1.74951860327091	5.97418070637991
8701	chr1	+	ENSG00000181039.7	protein_coding,	protein_coding	0	0.049634	8977	145470508	145475646	5139	protein_coding	KNOWN	ANKRD34A	protein_coding	ANKRD34A-001	145470508	1	3284	0.024817	3284	1	0	NA	NA	NA	NA	NA	NA	NA	NA	NA	NA	1	1933	1	0	0	0	20	NA	NA	NA	-	0.430513897	3276	-5.33252746377914	-1.8038916072645	5.32540107237197
8706	chr1	-	ENSG00000234222.1	processed_transcript,	processed_transcript	2.54576	1.93573	8982	145493881	145507490	13610	processed_transcript	NOVEL	RP11-315I20.1	processed_transcript	RP11-315I20.1-003	145507490	1	3286	2.240745	3286	1	0	NA	NA	NA	NA	NA	NA	NA	NA	NA	NA	0	NA	NA	NA	NA	NA	NA	NA	NA	NA	NA	0.444111178	3278	1.16397847742141	-2.34959570310448	7.28542077064981
8707	chr1	+	ENSG00000131795.7	retained_intron,retained_intron,protein_coding,	protein_coding	1.37895	0.893412	8983	145507598	145511444	3847	protein_coding	KNOWN	RBM8A	protein_coding	RBM8A-001	145507598	1	3287	3.408543	3287	1	0	NA	NA	NA	NA	NA	NA	NA	NA	NA	NA	0	NA	NA	NA	NA	NA	NA	NA	NA	NA	NA	0.461907618	3279	1.76915518327655	-2.35844661244669	6.46721442508074
8709	chr1	+	ENSG00000131795.7	protein_coding,	protein_coding	1.37895	0.893412	8985	145507633	145509451	1819	protein_coding	KNOWN	RBM8A	protein_coding	RBM8A-002	145507633	1	3289	1.136181	3289	1	0	NA	NA	NA	NA	NA	NA	NA	NA	NA	NA	0	NA	NA	NA	NA	NA	NA	NA	NA	NA	NA	0.463107379	3281	0.18419268255539	-2.46274566524997	6.40339743728284
8716	chr1	+	ENSG00000131779.6	protein_coding,	protein_coding	0.0530366	0	8992	145516252	145523730	7479	protein_coding	KNOWN	PEX11B	protein_coding	PEX11B-001	145516252	1	3292	0.0265183	3292	1	2	-1898|-144.5	5|5	0.0882352941176471|0.0344827586206897	0.0294117647058824|0.241379310344828	0.117647058823529|0.0344827586206897	34|29	NA|NA	NA|NA	NA|NA	-|-	2	109.5|233	5|4	0.148148148148148|0.05	0.111111111111111|0.05	0.037037037037037|0.05	27|20	NA|NA	NA|NA	NA|NA	+|+	0.447110578	3284	-5.23686789773981	-2.62770758309709	6.17463027728274
8732	chr1	+	ENSG00000131788.10	protein_coding,	protein_coding	2.28058	2.38243	9009	145576024	145586546	10523	protein_coding	KNOWN	PIAS3	protein_coding	PIAS3-002	145576024	1	3296	2.331505	3296	1	2	-225.5|-67.5	4|6	0.161290322580645|0.146341463414634	0.193548387096774|0.146341463414634	0.0645161290322581|0.0731707317073171	31|41	NA|NA	NA|NA	NA|NA	-|+	3	162.5|253.5|1516	4|5|4	0|0|0.15	0.19047619047619|0.243243243243243|0.05	0.142857142857143|0.0810810810810811|0.1	21|37|20	NA|NA|NA	NA|NA|NA	NA|NA|NA	+|+|+	0.50589882	3288	1.2212615235948	-1.18212793903543	4.15494024724289
8749	chr1	+	ENSG00000121848.8	nonsense_mediated_decay,	protein_coding	3.50042	3.47438	9027	145611050	145687091	76042	protein_coding	KNOWN	RNF115	nonsense_mediated_decay	RNF115-002	145611050	1	3299	3.4874	3299	1	0	NA	NA	NA	NA	NA	NA	NA	NA	NA	NA	0	NA	NA	NA	NA	NA	NA	NA	NA	NA	NA	0.434513097	3291	1.80215184874899	-2.21289521926986	6.18325639608438
8754	chr1	+	ENSG00000174827.9	protein_coding,	protein_coding	15.6988	19.6054	9033	145727724	145764067	36344	protein_coding	KNOWN	PDZK1	protein_coding	PDZK1-001	145727724	1	3301	17.6521	3301	1	0	NA	NA	NA	NA	NA	NA	NA	NA	NA	NA	0	NA	NA	NA	NA	NA	NA	NA	NA	NA	NA	0.463307339	3293	4.14176792027421	-4.21622321207524	4.99427232300464
8770	chr1	-	ENSG00000117262.14	nonsense_mediated_decay,protein_coding,	protein_coding	1.16681	0.99268	9049	145764411	145827073	62663	protein_coding	KNOWN	GPR89A	protein_coding	GPR89A-001	145827073	1	3302	2.15949	3302	1	1	-54.5	4	0	0.105263158	0.157894737	19	NA	NA	NA	+	0	NA	NA	NA	NA	NA	NA	NA	NA	NA	NA	0.428714257	3294	1.1106906358393	-0.970862380686724	7.32611315738211
8826	chr1	-	ENSG00000131791.6	protein_coding,	protein_coding	5.99314	4.06999	9106	146631069	146644046	12978	protein_coding	KNOWN	PRKAB2	protein_coding	PRKAB2-201	146644046	1	3334	5.031565	3334	1	0	NA	NA	NA	NA	NA	NA	NA	NA	NA	NA	0	NA	NA	NA	NA	NA	NA	NA	NA	NA	NA	0.414117177	3326	2.3310072005419	-1.8038916072645	6.07772170591752
8836	chr1	-	ENSG00000131781.8	protein_coding,	protein_coding	234.21	257.352	9116	146655884	146696945	41062	protein_coding	KNOWN	FMO5	protein_coding	FMO5-009	146696945	1	3339	245.781	3339	1	0	NA	NA	NA	NA	NA	NA	NA	NA	NA	NA	0	NA	NA	NA	NA	NA	NA	NA	NA	NA	NA	0.399520096	3331	7.9412295828439	-4.32768140267237	6.41221256859227
8842	chr1	+	ENSG00000131778.12	protein_coding,processed_transcript,processed_transcript,	protein_coding	73.2966	82.4421	9122	146714334	146767443	53110	protein_coding	KNOWN	CHD1L	protein_coding	CHD1L-001	146714334	1	3340	233.60805	3340	1	0	NA	NA	NA	NA	NA	NA	NA	NA	NA	NA	1	217.5	4	0.043478261	0.217391304	0.043478261	23	NA	NA	NA	+	0.430913817	3332	7.86794617929649	-3.0397729591752	7.09473443189197
8862	chr1	-	ENSG00000162836.6	protein_coding,	protein_coding	33.307	38.1189	9142	147119172	147142618	23447	protein_coding	KNOWN	ACP6	protein_coding	ACP6-001	147142618	1	3349	35.71295	3349	1	0	NA	NA	NA	NA	NA	NA	NA	NA	NA	NA	0	NA	NA	NA	NA	NA	NA	NA	NA	NA	NA	0.447110578	3341	5.15837540480094	-1.74515928276722	5.87682161564939
8932	chr1	+	ENSG00000212456.1	snRNA,	snRNA	0.0530366	0	9212	147994146	147994313	168	snRNA	NOVEL	U1.98	snRNA	U1.98-201	147994146	1	3401	0.0265183	3401	1	1	-91.5	4	0.074074074	0.111111111	0.074074074	27	NA	NA	NA	+	0	NA	NA	NA	NA	NA	NA	NA	NA	NA	NA	0.425114977	3393	-5.23686789773981	-4.60468267316494	5.10032208082567
8942	chr1	+	ENSG00000207501.1	snRNA,	snRNA	0.424293	0.049634	9222	148241465	148241628	164	snRNA	NOVEL	U1.93	snRNA	U1.93-201	148241465	1	3406	0.2369635	3406	1	1	-95.5	7	0.033898305	0.101694915	0.13559322	59	NA	NA	NA	+	0	NA	NA	NA	NA	NA	NA	NA	NA	NA	NA	0.436312737	3398	-2.07726324008588	-4.62234087158769	5.05963251008288
8963	chr1	+	ENSG00000243452.2	processed_transcript,	protein_coding	1.0077	1.04231	9243	148556009	148568877	12869	protein_coding	KNOWN	NBPF15	processed_transcript	NBPF15-003	148556009	1	3411	1.025005	3411	1	0	NA	NA	NA	NA	NA	NA	NA	NA	NA	NA	2	349.5|553.5	5|4	0.0689655172413793|0.0476190476190476	0.0689655172413793|0.0952380952380952	0.103448275862069|0.142857142857143	29|21	NA|NA	NA|NA	NA|NA	+|-	0.457108578	3403	0.0356309472503414	-1.81806545692848	5.85569094644399
8990	chr1	+	ENSG00000232527.3	processed_transcript,processed_transcript,	processed_transcript	12.7288	14.9398	9270	148928322	148932920	4599	processed_transcript	NOVEL	RP11-14N7.2	processed_transcript	RP11-14N7.2-001	148928322	1	3429	27.6686	3429	1	2	-849.5|-803	4|7	0.173913043478261|0.136363636363636	0|0	0.260869565217391|0.227272727272727	23|44	3|NA	3|NA	4|NA	-|-	5	100.5|1292|1561|1698|1988.5	4|4|4|4|5	0.0434782608695652|0.0833333333333333|0.1|0.178571428571429|0.114285714285714	0.0869565217391304|0.0833333333333333|0.133333333333333|0.178571428571429|0.114285714285714	0.217391304347826|0.0833333333333333|0.1|0.178571428571429|0.142857142857143	23|24|30|28|35	NA|NA|NA|NA|NA	NA|NA|NA|NA|NA	NA|NA|NA|NA|NA	+|-|-|-|-	0.398120376	3421	4.79017774193767	-5.4234642808324	6.61751604416734
9007	chr1	-	ENSG00000252826.1	snRNA,	snRNA	0.0530366	0	9287	149215166	149215300	135	snRNA	NOVEL	U1.125	snRNA	U1.125-201	149215300	1	3443	0.0265183	3443	1	1	-96.5	5	0.128205128	0.076923077	0.179487179	39	NA	NA	NA	-	0	NA	NA	NA	NA	NA	NA	NA	NA	NA	NA	0.437912418	3435	-5.23686789773981	-4.35990471662195	2.65956110219426
9089	chr1	-	ENSG00000184678.8	protein_coding,	protein_coding	10.4482	13.5005	9370	149856010	149858232	2223	protein_coding	KNOWN	HIST2H2BE	protein_coding	HIST2H2BE-001	149858232	1	3499	11.97435	3499	1	0	NA	NA	NA	NA	NA	NA	NA	NA	NA	NA	1	753	5	0.033333333	0.133333333	0.1	30	NA	NA	NA	+	0.479504099	3491	3.58187543959805	-2.58553098608213	6.35609465570944
9090	chr1	+	ENSG00000178096.7	protein_coding,	protein_coding	15.8049	14.4931	9371	149858486	149872044	13559	protein_coding	KNOWN	BOLA1	protein_coding	BOLA1-002	149858486	1	3500	15.149	3500	1	1	-1007	5	0.033333333	0.133333333	0.1	30	NA	NA	NA	+	0	NA	NA	NA	NA	NA	NA	NA	NA	NA	NA	0.458108378	3492	3.92115065804719	-3.28207383010665	7.18978116507819
9091	chr1	+	ENSG00000184260.4	protein_coding,	protein_coding	0.212147	0.297804	9372	149858525	149858961	437	protein_coding	KNOWN	HIST2H2AC	protein_coding	HIST2H2AC-001	149858525	1	3501	0.2549755	3501	1	1	-1046	5	0.033333333	0.133333333	0.1	30	NA	NA	NA	+	0	NA	NA	NA	NA	NA	NA	NA	NA	NA	NA	0.457508498	3493	-1.97156946633894	-3.65651708378363	7.19670939300822
9092	chr1	-	ENSG00000184270.3	protein_coding,	protein_coding	1.06073	0.49634	9373	149859019	149859466	448	protein_coding	KNOWN	HIST2H2AB	protein_coding	HIST2H2AB-001	149859466	1	3502	0.778535	3502	1	1	-1542	4	0	0.055555556	0.111111111	18	NA	NA	NA	-	1	1987	5	0.033333333	0.133333333	0.1	30	NA	NA	NA	+	0.452109578	3494	-0.361166195992303	-3.29193107591685	6.99557955651092
9113	chr1	-	ENSG00000163113.8	protein_coding,	protein_coding	2.97005	3.97072	9394	149915756	149982686	66931	protein_coding	KNOWN	OTUD7B	protein_coding	OTUD7B-201	149982686	1	3507	3.470385	3507	1	1	-167	4	0.230769231	0.192307692	0.076923077	26	4	2	7	-	1	330	4	0.166666667	0.125	0	24	NA	NA	NA	+	0.424915017	3499	1.79509572239427	-1.87990823750841	6.88147384767119
9122	chr1	+	ENSG00000136631.7	processed_transcript,	protein_coding	8.37979	9.3312	9403	150039866	150049107	9242	protein_coding	KNOWN	VPS45	processed_transcript	VPS45-006	150039866	1	3509	8.855495	3509	1	0	NA	NA	NA	NA	NA	NA	NA	NA	NA	NA	1	18	4	0.136363636	0.090909091	0.090909091	22	1	2	5	+	0.398120376	3501	3.14657295227202	-2.67575623216607	6.74145091489786
9148	chr1	+	ENSG00000118298.5	protein_coding,	protein_coding	0.742513	0.198536	9430	150230169	150237478	7310	protein_coding	KNOWN	CA14	protein_coding	CA14-001	150230169	1	3514	0.4705245	3514	1	2	-585|-411	4|4	0.0833333333333333|0.166666666666667	0.0416666666666667|0.125	0.0833333333333333|0.0833333333333333	24|24	NA|NA	NA|NA	NA|NA	-|-	1	1744.5	5	0.2	0.08	0.08	25	NA	NA	NA	-	0.480903819	3506	-1.08765824949304	-3.94117647204335	5.47218909277979
9152	chr1	-	ENSG00000117362.8	processed_transcript,	protein_coding	1.37895	0.794144	9434	150239356	150240166	811	protein_coding	KNOWN	APH1A	processed_transcript	APH1A-005	150240166	1	3516	1.086547	3516	1	3	-35|-1187.5|-1606	4|3|4	0.05|0.210526315789474|0.208333333333333	0|0|0.125	0.15|0|0.0416666666666667	20|19|24	NA|NA|4	NA|NA|5	NA|NA|2	+|+|+	1	1652.5	4	0.129032258	0.258064516	0.096774194	31	NA	NA	NA	-	0.514097181	3508	0.119750581514472	-4.64021795452476	4.24613501620404
9155	chr1	-	ENSG00000117362.8	protein_coding,	protein_coding	38.0803	30.5746	9437	150237804	150241399	3596	protein_coding	KNOWN	APH1A	protein_coding	APH1A-002	150241399	1	3518	34.32745	3518	1	1	-373	4	0.208333333	0.125	0.041666667	24	4	5	2	+	2	1198|45.5	4|3	0.05|0.210526315789474	0|0	0.15|0	20|19	NA|NA	NA|NA	NA|NA	+|+	0.478504299	3510	5.10129078617634	-0.820104301186362	6.58570180541351
9168	chr1	+	ENSG00000187145.10	protein_coding,	protein_coding	157.996	156.149	9450	150266289	150281414	15126	protein_coding	KNOWN	MRPS21	protein_coding	MRPS21-001	150266289	1	3521	157.0725	3521	1	0	NA	NA	NA	NA	NA	NA	NA	NA	NA	NA	0	NA	NA	NA	NA	NA	NA	NA	NA	NA	NA	0.451109778	3513	7.29528680779409	-1.96071559673712	6.96127148998396
9189	chr1	+	ENSG00000143374.8	protein_coding,protein_coding,	protein_coding	11.9863	12.4581	9471	150459911	150480078	20168	protein_coding	KNOWN	TARS2	protein_coding	TARS2-012	150459911	1	3526	24.4444	3526	1	2	-595|-526.5	3|4	0.125|0.04	0|0.08	0|0	16|25	NA|NA	NA|NA	NA|NA	+|-	0	NA	NA	NA	NA	NA	NA	NA	NA	NA	NA	0.479504099	3518	4.61143208899807	-2.44299877329932	6.2321697100179
9230	chr1	-	ENSG00000143420.12	protein_coding,protein_coding,protein_coding,	protein_coding	45.6645	41.6926	9513	150596096	150602053	5958	protein_coding	KNOWN	ENSA	protein_coding	ENSA-002	150602053	1	3539	131.03565	3539	1	0	NA	NA	NA	NA	NA	NA	NA	NA	NA	NA	2	187|44.5	4|4	0.0416666666666667|0.260869565217391	0.166666666666667|0.0434782608695652	0.0833333333333333|0	24|23	3|NA	1|NA	6|NA	-|+	0.434713057	3530	7.03381555940906	-2.00751581772411	6.28293657195637
9237	chr1	-	ENSG00000143457.5	protein_coding,	protein_coding	33.307	23.1295	9520	150620913	150669620	48708	protein_coding	KNOWN	GOLPH3L	protein_coding	GOLPH3L-002	150669620	1	3540	28.21825	3540	1	0	NA	NA	NA	NA	NA	NA	NA	NA	NA	NA	1	348.5	4	0.148148148	0.037037037	0	27	NA	NA	NA	+	0.346730654	3531	4.81855661455156	-2.06974865169297	4.43490893347047
9251	chr1	-	ENSG00000163131.5	protein_coding,	protein_coding	0.31822	0.943046	9534	150702551	150738305	35755	protein_coding	KNOWN	CTSS	protein_coding	CTSS-201	150738305	1	3543	0.630633	3543	1	0	NA	NA	NA	NA	NA	NA	NA	NA	NA	NA	0	NA	NA	NA	NA	NA	NA	NA	NA	NA	NA	0.375324935	3534	-0.665127429003954	-5.10775351243953	3.97947737760631
9266	chr1	-	ENSG00000143437.14	protein_coding,retained_intron,	protein_coding	2.86398	3.07731	9549	150784437	150849085	64649	protein_coding	KNOWN	ARNT	protein_coding	ARNT-009	150849085	1	3549	5.94129	3549	1	0	NA	NA	NA	NA	NA	NA	NA	NA	NA	NA	2	614|280.5	4|4	0.0454545454545455|0.151515151515152	0.0909090909090909|0.0606060606060606	0.136363636363636|0.0909090909090909	22|33	NA|NA	NA|NA	NA|NA	+|-	0.450709858	3540	2.57077620956904	-1.79235206206994	5.1469650716054
9281	chr1	+	ENSG00000143379.7	processed_transcript,protein_coding,	protein_coding	6.47047	5.21157	9564	150898900	150917586	18687	protein_coding	KNOWN	SETDB1	protein_coding	SETDB1-009	150898900	1	3553	11.68204	3553	1	1	-13	4	0.25	0	0.041666667	24	NA	NA	NA	-	1	166	5	0.083333333	0.083333333	0.083333333	24	NA	NA	NA	+	0.480303939	3544	3.54622032466148	-2.54792328574188	5.96897564789088
9302	chr1	+	ENSG00000143412.5	protein_coding,	protein_coding	5.62188	5.01304	9585	150954493	150968110	13618	protein_coding	KNOWN	ANXA9	protein_coding	ANXA9-001	150954493	1	3557	5.31746	3557	1	0	NA	NA	NA	NA	NA	NA	NA	NA	NA	NA	2	704|999.5	4|3	0.0588235294117647|0.0476190476190476	0.235294117647059|0.19047619047619	0.176470588235294|0.142857142857143	34|21	NA|NA	NA|NA	NA|NA	-|+	0.50569886	3548	2.41073727571417	-2.78785659290219	5.02796824958507
9305	chr1	-	ENSG00000143409.10	protein_coding,	protein_coding	5.83403	4.86413	9588	150969025	150979333	10309	protein_coding	KNOWN	FAM63A	protein_coding	FAM63A-002	150979333	1	3558	5.34908	3558	1	0	NA	NA	NA	NA	NA	NA	NA	NA	NA	NA	0	NA	NA	NA	NA	NA	NA	NA	NA	NA	NA	0.477304539	3549	2.41929078056576	-2.76316080564146	7.15545791261906
9318	chr1	+	ENSG00000143363.10	protein_coding,	protein_coding	0.424293	0.099268	9601	150997218	151008187	10970	protein_coding	KNOWN	PRUNE	protein_coding	PRUNE-004	150997218	1	3561	0.2617805	3561	1	1	-977	4	0.25	0.071428571	0.214285714	28	6	6	4	+	0	NA	NA	NA	NA	NA	NA	NA	NA	NA	NA	0.478504299	3552	-1.93357045979316	-2.99998844001949	2.35016002226266
9325	chr1	+	ENSG00000143443.8	protein_coding,	protein_coding	7.10691	7.2962	9608	151020216	151023896	3681	protein_coding	KNOWN	C1orf56	protein_coding	C1orf56-001	151020216	1	3563	7.201555	3563	1	0	NA	NA	NA	NA	NA	NA	NA	NA	NA	NA	2	98|1021	6|4	0.0833333333333333|0.0454545454545455	0.138888888888889|0.181818181818182	0.194444444444444|0.0909090909090909	36|22	NA|NA	NA|NA	NA|NA	-|-	0.478904219	3554	2.84830845496723	-2.15906708070505	5.95425233765231
9332	chr1	-	ENSG00000197622.7	processed_transcript,	protein_coding	5.46277	6.05535	9615	151025422	151032091	6670	protein_coding	KNOWN	CDC42SE1	processed_transcript	CDC42SE1-003	151032091	1	3565	5.75906	3565	1	1	-1361	4	0.153846154	0	0.269230769	26	NA	NA	NA	+	2	371|222	4|4	0.181818181818182|0.0357142857142857	0|0.107142857142857	0.0454545454545455|0.178571428571429	22|28	4|NA	1|NA	3|NA	-|-	0.449710058	3556	2.52583335263856	-1.74322599545633	6.22932656584935
9351	chr1	-	ENSG00000143434.10	protein_coding,	protein_coding	1.21984	1.04231	9634	151104161	151119104	14944	protein_coding	KNOWN	SEMA6C	protein_coding	SEMA6C-001	151119104	1	3569	1.131075	3569	1	2	-46|-959	5|4	0.0588235294117647|0.2	0.264705882352941|0	0.0588235294117647|0.05	34|20	NA|NA	NA|NA	NA|NA	-|-	2	1144|229	4|7	0.136363636363636|0.181818181818182	0|0.113636363636364	0.136363636363636|0.0227272727272727	22|44	2|NA	1|NA	5|NA	-|-	0.474505099	3560	0.17769459558823	-1.18671830612888	4.47703019818585
9353	chr1	-	ENSG00000163155.7	protein_coding,	protein_coding	6.31136	3.07731	9636	151132224	151138395	6172	protein_coding	KNOWN	LYSMD1	protein_coding	LYSMD1-001	151138395	1	3571	4.694335	3571	1	0	NA	NA	NA	NA	NA	NA	NA	NA	NA	NA	1	430	4	0.214285714	0.035714286	0.178571429	28	NA	NA	NA	-	0.49590082	3562	2.23092080001903	-1.57088860385629	6.56573740328462
9358	chr1	+	ENSG00000163156.6	protein_coding,	protein_coding	18.1916	14.9895	9641	151138555	151141614	3060	protein_coding	KNOWN	SCNM1	protein_coding	SCNM1-004	151138555	1	3572	16.59055	3572	1	1	-590	4	0.214285714	0.035714286	0.178571429	28	NA	NA	NA	-	0	NA	NA	NA	NA	NA	NA	NA	NA	NA	NA	0.462507499	3563	4.05228980933785	-1.85830045626919	7.28177619279633
9368	chr1	-	ENSG00000163159.6	protein_coding,	protein_coding	23.124	20.0521	9651	151148938	151162634	13697	protein_coding	KNOWN	VPS72	protein_coding	VPS72-002	151162634	1	3574	21.58805	3574	1	2	-119|-1209	4|4	0.136363636363636|0.333333333333333	0.0454545454545455|0.0666666666666667	0.227272727272727|0	22|30	6|NA	1|NA	3|NA	-|+	1	173.5	4	0.238095238	0.095238095	0.047619048	21	3	4	1	-	0.460107978	3565	4.43216102873488	-2.23377974871857	6.24046713042209
9375	chr1	+	ENSG00000143398.14	protein_coding,protein_coding,	protein_coding	22.7527	21.5412	9658	151171029	151222007	50979	protein_coding	KNOWN	PIP5K1A	protein_coding	PIP5K1A-002	151171029	1	3575	44.2939	3575	1	0	NA	NA	NA	NA	NA	NA	NA	NA	NA	NA	1	1871.5	3	0	0.066666667	0.066666667	15	NA	NA	NA	+	0.477304539	3566	5.4690361244644	-1.68918996032211	7.46839437801402
9397	chr1	+	ENSG00000143373.12	protein_coding,	protein_coding	0.47733	0.24817	9683	151254094	151259181	5088	protein_coding	KNOWN	ZNF687	protein_coding	ZNF687-004	151254094	1	3577	0.36275	3577	1	1	-32	4	0.125	0.166666667	0.041666667	24	NA	NA	NA	-	1	1118	4	0.083333333	0.125	0.083333333	24	NA	NA	NA	+	0.476904619	3568	-1.46295248059534	-2.70180158475438	7.13523529675808
9399	chr1	-	ENSG00000232671.2	protein_coding,	protein_coding	1.43199	1.38975	9685	151252500	151254405	1906	protein_coding	NOVEL	RP11-126K1.2	protein_coding	RP11-126K1.2-001	151254405	1	3578	1.41087	3578	1	1	-807	4	0.083333333	0.125	0.083333333	24	NA	NA	NA	+	1	343	4	0.125	0.166666667	0.041666667	24	NA	NA	NA	-	0.570685863	3569	0.496585061644846	-1.19958333874867	7.72907148596602
9413	chr1	-	ENSG00000143393.12	protein_coding,protein_coding,	protein_coding	8.59194	10.5224	9704	151264413	151300133	35721	protein_coding	KNOWN	PI4KB	protein_coding	PI4KB-003	151300133	1	3580	19.11434	3580	1	1	-664	4	0.142857143	0.142857143	0.107142857	28	NA	NA	NA	+	2	451.5|433.5	4|2	0.210526315789474|0	0.0526315789473684|0	0.0526315789473684|0.0666666666666667	19|15	3|NA	1|NA	3|NA	+|-	0.448510298	3571	4.25658348103085	-2.33933789362171	5.81106015268119
9432	chr1	-	ENSG00000143390.13	nonsense_mediated_decay,protein_coding,	protein_coding	8.06157	10.3735	9724	151317598	151319769	2172	protein_coding	KNOWN	RFX5	nonsense_mediated_decay	RFX5-014	151319769	1	3584	18.43507	3584	1	0	NA	NA	NA	NA	NA	NA	NA	NA	NA	NA	0	NA	NA	NA	NA	NA	NA	NA	NA	NA	NA	0.474305139	3575	4.20438098940215	-1.5420338434217	6.19759039415947
9446	chr1	-	ENSG00000143416.15	nonsense_mediated_decay,retained_intron,processed_transcript,	protein_coding	10.7664	10.3735	9738	151338917	151345181	6265	protein_coding	KNOWN	SELENBP1	nonsense_mediated_decay	SELENBP1-007	151345181	1	3585	31.70985	3585	1	1	-1438.5	4	0.238095238	0.095238095	0	21	1	5	2	-	2	925|600.5	5|4	0|0.148148148148148	0.0666666666666667|0.0740740740740741	0.233333333333333|0.148148148148148	30|27	NA|NA	NA|NA	NA|NA	-|+	0.48990202	3576	4.98685914783312	-2.16552497614447	5.83512593368264
9452	chr1	+	ENSG00000159377.6	retained_intron,	protein_coding	119.439	78.2232	9744	151372055	151373547	1493	protein_coding	KNOWN	PSMB4	retained_intron	PSMB4-004	151372055	1	3586	98.8311	3586	1	0	NA	NA	NA	NA	NA	NA	NA	NA	NA	NA	0	NA	NA	NA	NA	NA	NA	NA	NA	NA	NA	0.458308338	3577	6.62689319292776	-2.69244559475244	6.84278284991485
9468	chr1	-	ENSG00000143442.15	protein_coding,protein_coding,protein_coding,retained_intron,retained_intron,protein_coding,	protein_coding	1.11377	1.58829	9761	151375201	151431655	56455	protein_coding	KNOWN	POGZ	protein_coding	POGZ-003	151431655	1	3589	8.10618	3589	1	2	-71.5|-206	6|5	0.102564102564103|0.0526315789473684	0.0769230769230769|0.131578947368421	0.0769230769230769|0.0263157894736842	39|38	NA|NA	NA|NA	NA|NA	+|+	4	1586|615.5|529|485	4|4|4|5	0.25|0.157894736842105|0.0666666666666667|0.0714285714285714	0.0833333333333333|0.0526315789473684|0.2|0.142857142857143	0|0.0526315789473684|0|0	24|19|30|28	NA|NA|NA|NA	NA|NA|NA|NA	NA|NA|NA|NA	-|+|-|-	0.451109778	3580	3.01902221118837	-2.38156585339273	2.42137359981583
9475	chr1	+	ENSG00000143375.9	protein_coding,	protein_coding	0.15911	0.24817	9768	151483863	151491868	8006	protein_coding	KNOWN	CGN	protein_coding	CGN-007	151483863	1	3590	0.20364	3590	1	0	NA	NA	NA	NA	NA	NA	NA	NA	NA	NA	3	71.5|265.5|1866	8|6|4	0|0.162162162162162|0.15	0.311111111111111|0.0540540540540541|0.1	0.155555555555556|0.0810810810810811|0	45|37|20	NA|NA|NA	NA|NA|NA	NA|NA|NA	-|+|-	0.476504699	3581	-2.29590712417299	-1.89861341608065	4.05620268598688
9482	chr1	+	ENSG00000143367.10	protein_coding,protein_coding,protein_coding,	protein_coding	3.50042	4.26853	9775	151512781	151556058	43278	protein_coding	KNOWN	TUFT1	protein_coding	TUFT1-201	151512781	1	3593	11.653425	3593	1	0	NA	NA	NA	NA	NA	NA	NA	NA	NA	NA	1	1018.5	4	0.173913043	0.086956522	0.130434783	23	NA	NA	NA	-	0.49610078	3584	3.54268212739075	-2.40277111303034	5.74367673937817
9487	chr1	+	ENSG00000232536.1	processed_transcript,	processed_transcript	0	0.049634	9780	151512992	151534331	21340	processed_transcript	PUTATIVE	RP11-74C1.4	processed_transcript	RP11-74C1.4-001	151512992	1	3594	0.024817	3594	1	0	NA	NA	NA	NA	NA	NA	NA	NA	NA	NA	1	807.5	4	0.173913043	0.086956522	0.130434783	23	NA	NA	NA	-	0.50189962	3585	-5.33252746377914	-3.60470025196029	6.36796519115742
9515	chr1	-	ENSG00000143436.6	processed_transcript,	protein_coding	0.583403	0.198536	9810	151732130	151733995	1866	protein_coding	KNOWN	MRPL9	processed_transcript	MRPL9-011	151733995	1	3610	0.3909695	3610	1	1	-1729	4	0.088235294	0.147058824	0.117647059	34	NA	NA	NA	-	0	NA	NA	NA	NA	NA	NA	NA	NA	NA	NA	0.464507099	3600	-1.35487202933692	-5.4738670315075	2.32146867702215
9522	chr1	-	ENSG00000143436.6	processed_transcript,	protein_coding	84.2222	68.0979	9817	151732123	151735972	3850	protein_coding	KNOWN	MRPL9	processed_transcript	MRPL9-003	151735972	1	3612	76.16005	3612	1	0	NA	NA	NA	NA	NA	NA	NA	NA	NA	NA	1	248	4	0.088235294	0.147058824	0.117647059	34	NA	NA	NA	-	0.446310738	3602	6.25096252068039	-1.64475368724018	6.00154126200727
9536	chr1	-	ENSG00000182134.11	protein_coding,nonsense_mediated_decay,	protein_coding	3.97775	5.36047	9832	151745968	151762964	16997	protein_coding	KNOWN	TDRKH	protein_coding	TDRKH-003	151762964	1	3617	9.33822	3617	1	1	-776	4	0.1	0.233333333	0.033333333	30	NA	NA	NA	+	2	179.5|126.5	4|4	0.238095238095238|0.259259259259259	0.0476190476190476|0.0740740740740741	0|0.111111111111111	21|27	5|3	2|7	1|4	-|-	0.438312338	3607	3.22314757756813	-0.744436454092704	5.55139322630418
9540	chr1	+	ENSG00000203288.3	processed_transcript,	processed_transcript	3.7656	2.87877	9836	151763318	151766878	3561	processed_transcript	NOVEL	RP11-98D18.9	processed_transcript	RP11-98D18.9-001	151763318	1	3618	3.322185	3618	1	2	-533.5|-480.5	4|4	0.238095238095238|0.259259259259259	0.0476190476190476|0.0740740740740741	0|0.111111111111111	21|27	5|3	2|7	1|4	-|-	1	422	4	0.1	0.233333333	0.033333333	30	NA	NA	NA	+	0.435712857	3608	1.73213241380334	-1.93676768793478	5.57966313881764
9554	chr1	-	ENSG00000159445.8	nonsense_mediated_decay,	protein_coding	3.60649	2.92841	9851	151846531	151881978	35448	protein_coding	KNOWN	THEM4	nonsense_mediated_decay	THEM4-002	151881978	1	3627	3.26745	3627	1	2	-288.5|-1320	4|3	0.0740740740740741|0.125	0.148148148148148|0	0.148148148148148|0.166666666666667	27|24	NA|NA	NA|NA	NA|NA	-|-	1	163	4	0.083333333	0.291666667	0.083333333	24	NA	NA	NA	-	0.436512697	3617	1.70816515941659	-1.18311033176965	6.84033741978037
9608	chr1	+	ENSG00000186226.7	protein_coding,	protein_coding	0.106073	0.099268	9906	152758690	152760178	1489	protein_coding	KNOWN	LCE1E	protein_coding	LCE1E-002	152758690	1	3671	0.1026705	3671	1	0	NA	NA	NA	NA	NA	NA	NA	NA	NA	NA	1	1155	6	0.131578947	0.131578947	0.210526316	38	NA	NA	NA	-	0.386922615	3660	-3.28390637883366	-4.88252829157515	2.25854144851758
9657	chr1	+	ENSG00000163220.10	protein_coding,	protein_coding	1.27288	0.843778	9955	153330330	153333503	3174	protein_coding	KNOWN	S100A9	protein_coding	S100A9-001	153330330	1	3702	1.058329	3702	1	0	NA	NA	NA	NA	NA	NA	NA	NA	NA	NA	3	638.5|958.5|1414.5	4|4|5	0.241379310344828|0.0952380952380952|0.12	0.0344827586206897|0.0952380952380952|0.12	0.172413793103448|0.142857142857143|0.08	29|21|25	7|NA|NA	5|NA|NA	5|NA|NA	+|+|-	0.516496701	3691	0.0817881840537489	-3.88681156763638	2.8648117269182
9685	chr1	-	ENSG00000188015.5	protein_coding,	protein_coding	0.901623	0.694876	9983	153519989	153521602	1614	protein_coding	KNOWN	S100A3	protein_coding	S100A3-002	153521602	1	3715	0.7982495	3715	1	2	-742.5|-1160.5	4|4	0.111111111111111|0.275862068965517	0.0740740740740741|0.0344827586206897	0.222222222222222|0.0689655172413793	27|29	NA|NA	NA|NA	NA|NA	-|-	1	1184.5	4	0.043478261	0.130434783	0.217391304	23	NA	NA	NA	-	0.533493301	3704	-0.325088350753436	-4.62589860312351	2.32883877572724
9706	chr1	-	ENSG00000189171.8	protein_coding,	protein_coding	0.583403	0.297804	10004	153591280	153599744	8465	protein_coding	KNOWN	S100A13	protein_coding	S100A13-203	153599744	1	3720	0.4406035	3720	1	2	-1119.5|-1373.5	3|5	0.0952380952380952|0.171428571428571	0.0952380952380952|0.0571428571428571	0.0476190476190476|0.2	21|35	NA|NA	NA|NA	NA|NA	+|+	0	NA	NA	NA	NA	NA	NA	NA	NA	NA	NA	0.556488702	3709	-1.18244713953856	-2.98849287002743	5.55739810867651
9707	chr1	+	ENSG00000160678.7	protein_coding,	protein_coding	0.0530366	0.049634	10005	153600402	153604510	4109	protein_coding	KNOWN	S100A1	protein_coding	S100A1-003	153600402	1	3721	0.0513353	3721	1	0	NA	NA	NA	NA	NA	NA	NA	NA	NA	NA	4	461.5|715.5|1348.5|1743	3|5|4|4	0.0952380952380952|0.171428571428571|0.185185185185185|0.25	0.0952380952380952|0.0571428571428571|0.037037037037037|0.0357142857142857	0.0476190476190476|0.2|0.148148148148148|0.107142857142857	21|35|27|28	NA|NA|NA|NA	NA|NA|NA|NA	NA|NA|NA|NA	+|+|-|-	0.50909818	3710	-4.28390497366436	-3.95677310847255	4.60857319700905
9727	chr1	+	ENSG00000143553.6	processed_transcript,	protein_coding	33.4661	37.1262	10026	153631188	153633726	2539	protein_coding	KNOWN	SNAPIN	processed_transcript	SNAPIN-003	153631188	1	3729	35.29615	3729	1	0	NA	NA	NA	NA	NA	NA	NA	NA	NA	NA	1	191	4	0.136363636	0.045454545	0.090909091	22	NA	NA	NA	+	0.4895021	3718	5.1414389220432	-1.51333292404981	4.97984282002634
9755	chr1	+	ENSG00000143554.9	protein_coding,	protein_coding	1.21984	1.29048	10055	153747768	153752630	4863	protein_coding	KNOWN	SLC27A3	protein_coding	SLC27A3-201	153747768	1	3744	1.25516	3744	1	1	-19	4	0.083333333	0.125	0.083333333	24	1	2	5	+	2	58.5|1154	4|5	0.0952380952380952|0.192307692307692	0.0952380952380952|0.0769230769230769	0.142857142857143|0.115384615384615	21|26	3|NA	1|NA	3|NA	+|+	0.563887223	3733	0.327871281700711	-2.92356680476047	5.05017115249337
9783	chr1	-	ENSG00000198837.5	protein_coding,	protein_coding	4.61419	4.5167	10084	153901977	153919172	17196	protein_coding	KNOWN	DENND4B	protein_coding	DENND4B-001	153919172	1	3750	4.565445	3750	1	2	-936|-1215	5|5	0.175|0.2	0.125|0.133333333333333	0.2|0.1	40|30	NA|NA	NA|NA	NA|NA	-|-	2	762|442.5	5|4	0.15625|0.16	0.09375|0.16	0.15625|0	32|25	NA|2	NA|5	NA|5	+|-	0.528294341	3739	2.19075548846884	-0.978517445194314	5.9963346883364
9800	chr1	+	ENSG00000143578.11	processed_transcript,	protein_coding	2.01539	2.82914	10102	153940010	153941444	1435	protein_coding	KNOWN	CREB3L4	processed_transcript	CREB3L4-005	153940010	1	3753	2.422265	3753	1	1	-823.5	4	0.37037037	0.111111111	0.074074074	27	4	7	4	-	0	NA	NA	NA	NA	NA	NA	NA	NA	NA	NA	0.523495301	3742	1.27635670701084	-3.18703693283902	4.1785878310331
9803	chr1	+	ENSG00000143578.11	protein_coding,	protein_coding	9.91785	9.67863	10105	153940346	153946832	6487	protein_coding	KNOWN	CREB3L4	protein_coding	CREB3L4-201	153940346	1	3755	9.79824	3755	1	1	-1159.5	4	0.37037037	0.111111111	0.074074074	27	4	7	4	-	0	NA	NA	NA	NA	NA	NA	NA	NA	NA	NA	0.521095781	3744	3.29252262970703	-2.87831081842622	5.50510357763235
9819	chr1	-	ENSG00000143543.10	protein_coding,	protein_coding	56.484	47.7479	10121	153946988	153950136	3149	protein_coding	KNOWN	JTB	protein_coding	JTB-003	153950136	1	3756	52.11595	3756	1	0	NA	NA	NA	NA	NA	NA	NA	NA	NA	NA	0	NA	NA	NA	NA	NA	NA	NA	NA	NA	NA	0.443711258	3745	5.70365306939318	-2.58120773987867	6.90670314290682
9823	chr1	-	ENSG00000143545.4	protein_coding,	protein_coding	20.0479	19.7543	10125	153954127	153958828	4702	protein_coding	KNOWN	RAB13	protein_coding	RAB13-001	153958828	1	3757	19.9011	3757	1	1	-60	4	0.055555556	0.111111111	0.055555556	18	1	1	2	-	2	706.5|94	4|4	0.2|0.0833333333333333	0.16|0.0833333333333333	0.08|0.0416666666666667	25|24	NA|NA	NA|NA	NA|NA	+|+	0.50129974	3746	4.31477627041436	-3.00461242943439	6.20689342001124
9850	chr1	-	ENSG00000143549.13	protein_coding,nonsense_mediated_decay,	protein_coding	320.076	352.898	10152	154128840	154155684	26845	protein_coding	KNOWN	TPM3	protein_coding	TPM3-003	154155684	1	3766	672.974	3766	1	1	-183.5	4	0.142857143	0.095238095	0.095238095	21	NA	NA	NA	+	0	NA	NA	NA	NA	NA	NA	NA	NA	NA	NA	0.459508098	3755	9.39440695791545	-1.10655703288425	6.33048685050469
9861	chr1	-	ENSG00000143612.13	processed_transcript,	protein_coding	1.37895	1.83646	10163	154184933	154186992	2060	protein_coding	KNOWN	C1orf43	processed_transcript	C1orf43-007	154186992	1	3770	1.607705	3770	1	0	NA	NA	NA	NA	NA	NA	NA	NA	NA	NA	0	NA	NA	NA	NA	NA	NA	NA	NA	NA	NA	0.439912018	3759	0.68500270870516	-4.84472744412453	2.22481378969469
9878	chr1	+	ENSG00000252817.1	miRNA,	miRNA	0.0530366	0	10180	154226921	154226997	77	miRNA	NOVEL	AL590431.1	miRNA	AL590431.1-201	154226921	1	3774	0.0265183	3774	1	0	NA	NA	NA	NA	NA	NA	NA	NA	NA	NA	0	NA	NA	NA	NA	NA	NA	NA	NA	NA	NA	0.461107778	3763	-5.23686789773981	-4.92134637798774	2.05603132498261
9885	chr1	+	ENSG00000143569.13	processed_transcript,	protein_coding	1.0077	0.99268	10189	154234104	154243649	9546	protein_coding	KNOWN	UBAP2L	processed_transcript	UBAP2L-014	154234104	1	3777	1.00019	3777	1	0	NA	NA	NA	NA	NA	NA	NA	NA	NA	NA	2	1405|1698.5	4|4	0.142857142857143|0.24	0.107142857142857|0	0.214285714285714|0.04	28|25	NA|NA	NA|NA	NA|NA	-|-	0.441111778	3766	0.000274086020421301	-5.61521627653597	2.19837094960837
9945	chr1	-	ENSG00000160710.10	processed_transcript,	protein_coding	17.8733	20.9952	10249	154574554	154600388	25835	protein_coding	KNOWN	ADAR	processed_transcript	ADAR-006	154600388	1	3799	19.43425	3799	1	1	-12	4	0.1	0	0.05	20	NA	NA	NA	-	0	NA	NA	NA	NA	NA	NA	NA	NA	NA	NA	0.363527295	3788	4.28052952763991	-2.54287012971628	7.24997626756287
9972	chr1	-	ENSG00000160691.12	protein_coding,protein_coding,	protein_coding	14.1608	10.8699	10277	154934774	154943223	8450	protein_coding	KNOWN	SHC1	protein_coding	SHC1-003	154943223	1	3805	25.0307	3805	1	0	NA	NA	NA	NA	NA	NA	NA	NA	NA	NA	0	NA	NA	NA	NA	NA	NA	NA	NA	NA	NA	0.529094181	3794	4.64562673239413	-2.22836110684081	5.19599354071018
9977	chr1	+	ENSG00000173207.7	protein_coding,	protein_coding	31.822	20.9456	10282	154947129	154951724	4596	protein_coding	KNOWN	CKS1B	protein_coding	CKS1B-002	154947129	1	3806	26.3838	3806	1	3	-1890|-517|-461	4|6|4	0.181818181818182|0.125|0.0769230769230769	0.0909090909090909|0.15|0.192307692307692	0|0.125|0.115384615384615	22|40|26	NA|NA|NA	NA|NA|NA	NA|NA|NA	+|+|+	0	NA	NA	NA	NA	NA	NA	NA	NA	NA	NA	0.548690262	3795	4.72158046259808	-3.18835137058545	6.41190767258168
9987	chr1	+	ENSG00000160688.14	protein_coding,	protein_coding	14.479	14.9895	10292	154955841	154965587	9747	protein_coding	KNOWN	FLAD1	protein_coding	FLAD1-003	154955841	1	3807	14.73425	3807	1	1	-254	5	0.1	0.166666667	0.133333333	30	NA	NA	NA	-	2	84.5|492	4|4	0.310344827586207|0.153846153846154	0.0689655172413793|0.153846153846154	0.137931034482759|0.115384615384615	29|26	5|NA	5|NA	7|NA	+|-	0.469306139	3796	3.88110172142877	-2.36140895186843	7.13893328033407
10019	chr1	+	ENSG00000143537.8	nonsense_mediated_decay,nonsense_mediated_decay,protein_coding,protein_coding,protein_coding,protein_coding,protein_coding,protein_coding,protein_coding,	protein_coding	3.02309	2.1839	10325	155023762	155035234	11473	protein_coding	KNOWN	ADAM15	protein_coding	ADAM15-037	155023762	1	3813	23.431455	3813	1	1	-28	7	0.029411765	0.176470588	0.029411765	34	NA	NA	NA	+	6	131.5|211|794|917.5|1080.5|1830	4|4|4|4|5|2	0|0.0833333333333333|0.142857142857143|0.137931034482759|0.2|0	0.32|0.125|0.25|0.0344827586206897|0.08|0	0.12|0.0833333333333333|0|0.206896551724138|0.04|0.0555555555555556	25|24|28|29|25|18	NA|NA|2|5|NA|NA	NA|NA|7|6|NA|NA	NA|NA|7|4|NA|NA	+|+|+|+|+|-	0.562287542	3802	4.55037463748404	-1.51539371593547	4.94114427114895
10062	chr1	+	ENSG00000169241.12	processed_transcript,	protein_coding	0.848586	0.794144	10369	155108792	155111050	2259	protein_coding	KNOWN	SLC50A1	processed_transcript	SLC50A1-012	155108792	1	3823	0.821365	3823	1	3	-199|-129|-42	5|3|6	0.1875|0.1|0.147058823529412	0.15625|0.05|0.117647058823529	0.09375|0|0.0588235294117647	32|20|34	NA|NA|NA	NA|NA|NA	NA|NA|NA	+|+|-	0	NA	NA	NA	NA	NA	NA	NA	NA	NA	NA	0.545290942	3811	-0.283904622372254	-3.58033598009992	3.5265206103486
10065	chr1	-	ENSG00000179085.7	protein_coding,	protein_coding	9.1223	6.8495	10372	155112367	155113020	654	protein_coding	KNOWN	DPM3	protein_coding	DPM3-001	155113020	1	3824	7.9859	3824	1	0	NA	NA	NA	NA	NA	NA	NA	NA	NA	NA	1	34.5	4	0.137931034	0.172413793	0.034482759	29	NA	NA	NA	-	0.464707059	3812	2.99745500655556	-2.5820713826935	7.08004801439427
10073	chr1	-	ENSG00000163463.6	processed_transcript,processed_transcript,	protein_coding	107.081	86.661	10380	155141946	155145733	3788	protein_coding	KNOWN	KRTCAP2	processed_transcript	KRTCAP2-011	155145733	1	3827	193.742	3827	1	4	-688.5|-808.5|-1199|-1556	6|7|5|7	0.135135135135135|0.163265306122449|0.03125|0.19047619047619	0.243243243243243|0.102040816326531|0.0625|0.0952380952380952	0.0540540540540541|0.142857142857143|0.1875|0.0714285714285714	37|49|32|42	NA|NA|NA|NA	NA|NA|NA|NA	NA|NA|NA|NA	+|+|-|+	1	182.5	5	0.034482759	0.137931034	0.172413793	29	NA	NA	NA	-	0.582683463	3815	7.59799292958812	-1.41850027024768	6.62298316956424
10079	chr1	-	ENSG00000163463.6	processed_transcript,	protein_coding	0.106073	0.099268	10386	155141884	155145951	4068	protein_coding	KNOWN	KRTCAP2	processed_transcript	KRTCAP2-006	155145951	1	3829	0.1026705	3829	1	4	-470.5|-590.5|-981|-1338	6|7|5|7	0.135135135135135|0.163265306122449|0.03125|0.19047619047619	0.243243243243243|0.102040816326531|0.0625|0.0952380952380952	0.0540540540540541|0.142857142857143|0.1875|0.0714285714285714	37|49|32|42	NA|NA|NA|NA	NA|NA|NA|NA	NA|NA|NA|NA	+|+|-|+	1	400.5	5	0.034482759	0.137931034	0.172413793	29	NA	NA	NA	-	0.579284143	3817	-3.28390637883366	-3.74659640704169	6.53322706632585
10115	chr1	-	ENSG00000169231.8	protein_coding,protein_coding,	protein_coding	0.31822	0.545974	10422	155167688	155177690	10003	protein_coding	KNOWN	THBS3	protein_coding	THBS3-201	155177690	1	3842	0.864194	3842	1	2	-798|-1175.5	5|5	0.0384615384615385|0.0645161290322581	0.0769230769230769|0.225806451612903	0.153846153846154|0.0645161290322581	26|31	NA|NA	NA|NA	NA|NA	-|-	1	1422.5	5	0.090909091	0.060606061	0.151515152	33	NA	NA	NA	-	0.554889022	3830	-0.210572880391438	-4.45163046864474	4.82429984391474
10144	chr1	-	ENSG00000177628.8	processed_transcript,protein_coding,	protein_coding	20.7373	20.6974	10451	155204744	155211034	6291	protein_coding	KNOWN	GBA	protein_coding	GBA-201	155211034	1	3851	41.4347	3851	1	0	NA	NA	NA	NA	NA	NA	NA	NA	NA	NA	1	1169	6	0.15625	0.15625	0.0625	32	NA	NA	NA	+	0.49310138	3839	5.37276757154306	-3.14814819131464	5.07652523242332
10161	chr1	-	ENSG00000160767.15	protein_coding,retained_intron,	protein_coding	3.23524	1.88609	10468	155217551	155225274	7724	protein_coding	KNOWN	FAM189B	protein_coding	FAM189B-201	155225274	1	3852	5.12133	3852	1	1	-5	5	0.194444444	0.027777778	0.111111111	36	NA	NA	NA	+	1	240.5	5	0.222222222	0.037037037	0.074074074	27	NA	NA	NA	+	0.522695461	3840	2.35651852413747	-2.0528889765251	4.88283906531479
10196	chr1	+	ENSG00000160752.10	processed_transcript,processed_transcript,	protein_coding	210.927	294.23	10503	155278705	155282770	4066	protein_coding	KNOWN	FDPS	processed_transcript	FDPS-005	155278705	1	3859	505.157	3859	1	0	NA	NA	NA	NA	NA	NA	NA	NA	NA	NA	1	1075	4	0.083333333	0.083333333	0.125	24	NA	NA	NA	+	0.50769846	3847	8.98058802896552	-3.16357817142868	7.76943066877704
10238	chr1	+	ENSG00000235919.2	processed_transcript,	processed_transcript	0.106073	0	10545	155531833	155533437	1605	processed_transcript	PUTATIVE	RP11-29H23.1	processed_transcript	RP11-29H23.1-002	155531833	1	3876	0.0530365	3876	1	1	-25.5	4	0.2	0.04	0	25	NA	NA	NA	-	3	804|867.5|963.5	3|3|4	0.1|0.0869565217391304|0.0869565217391304	0.05|0|0.217391304347826	0|0.130434782608696|0.0434782608695652	20|23|23	NA|NA|2	NA|NA|6	NA|NA|2	-|-|+	0.422315537	3864	-4.23687061793002	-3.45322556587728	7.32520659761336
10264	chr1	-	ENSG00000246203.2	unprocessed_pseudogene,	pseudogene	0.0530366	0.049634	10571	155584517	155630036	45520	pseudogene	KNOWN	RP11-29H23.5	unprocessed_pseudogene	RP11-29H23.5-001	155630036	1	3885	0.0513353	3885	1	0	NA	NA	NA	NA	NA	NA	NA	NA	NA	NA	0	NA	NA	NA	NA	NA	NA	NA	NA	NA	NA	0.470105979	3873	-4.28390497366436	-4.13793982006919	2.51813425867339
10272	chr1	+	ENSG00000132676.10	processed_transcript,	protein_coding	0.79555	0.545974	10579	155657751	155659128	1378	protein_coding	KNOWN	DAP3	processed_transcript	DAP3-006	155657751	1	3887	0.670762	3887	1	1	-25.5	4	0.2	0.04	0	25	NA	NA	NA	-	1	753	4	0.111111111	0.055555556	0	18	NA	NA	NA	-	0.426914617	3875	-0.576127135210541	-2.57345828646079	7.46782075996754
10285	chr1	-	ENSG00000163374.15	protein_coding,	protein_coding	8.37979	6.55169	10592	155629237	155658496	29260	protein_coding	KNOWN	YY1AP1	protein_coding	YY1AP1-025	155658496	1	3888	7.46574	3888	1	1	-8	4	0.111111111	0.055555556	0	18	NA	NA	NA	-	1	770.5	4	0.2	0.04	0	25	NA	NA	NA	-	0.462107578	3876	2.90028526657801	-2.01624352368246	7.84406175435559
10296	chr1	+	ENSG00000132676.10	protein_coding,processed_transcript,protein_coding,	protein_coding	55.5294	50.3289	10603	155658882	155708317	49436	protein_coding	KNOWN	DAP3	protein_coding	DAP3-201	155658882	1	3889	158.78745	3889	1	2	-1156.5|-378	4|4	0.2|0.111111111111111	0.04|0.0555555555555556	0|0	25|18	NA|NA	NA|NA	NA|NA	-|-	0	NA	NA	NA	NA	NA	NA	NA	NA	NA	NA	0.477904419	3877	7.31095308123384	-2.4949139967452	7.33615132197517
10329	chr1	-	ENSG00000116580.12	protein_coding,	protein_coding	5.3567	4.41743	10636	155734218	155826995	92778	protein_coding	KNOWN	GON4L	protein_coding	GON4L-001	155826995	1	3895	4.887065	3895	1	0	NA	NA	NA	NA	NA	NA	NA	NA	NA	NA	1	146	4	0.045454545	0.136363636	0.181818182	22	5	1	4	-	0.477104579	3883	2.28896829315713	-2.00751581772411	7.20460248643895
10334	chr1	+	ENSG00000132718.7	protein_coding,	protein_coding	0.47733	0.893412	10641	155829347	155851946	22600	protein_coding	KNOWN	SYT11	protein_coding	SYT11-201	155829347	1	3896	0.685371	3896	1	0	NA	NA	NA	NA	NA	NA	NA	NA	NA	NA	1	755.5	4	0.16	0.04	0.08	25	NA	NA	NA	+	0.456108778	3884	-0.54504294627702	-1.76512592195552	2.94508477444578
10338	chr1	-	ENSG00000143622.5	processed_transcript,	protein_coding	72.1829	98.5235	10645	155870189	155881135	10947	protein_coding	KNOWN	RIT1	processed_transcript	RIT1-003	155881135	1	3898	85.3532	3898	1	1	-119.5	7	0.153846154	0.102564103	0.128205128	39	NA	NA	NA	-	1	375.5	4	0.161290323	0.032258065	0.225806452	31	NA	NA	NA	-	0.418716257	3886	6.41537333762589	-1.83855859703301	5.22096478426366
10345	chr1	-	ENSG00000132680.6	processed_transcript,	protein_coding	0.901623	1.04231	10652	155883903	155895554	11652	protein_coding	KNOWN	KIAA0907	processed_transcript	KIAA0907-004	155895554	1	3901	0.9719665	3901	1	0	NA	NA	NA	NA	NA	NA	NA	NA	NA	NA	0	NA	NA	NA	NA	NA	NA	NA	NA	NA	NA	0.412517497	3889	-0.041021504427439	-5.41728597065857	2.36132145260783
10350	chr1	-	ENSG00000132680.6	processed_transcript,	protein_coding	23.2831	26.4549	10657	155896262	155904189	7928	protein_coding	KNOWN	KIAA0907	processed_transcript	KIAA0907-009	155904189	1	3903	24.869	3903	1	1	-1288.5	4	0.034482759	0.034482759	0.137931034	29	NA	NA	NA	+	0	NA	NA	NA	NA	NA	NA	NA	NA	NA	NA	0.444911018	3891	4.63627659182512	-1.83289389346872	7.76627717352512
10365	chr1	-	ENSG00000116584.10	protein_coding,	protein_coding	12.3045	10.572	10672	155916645	155948318	31674	protein_coding	KNOWN	ARHGEF2	protein_coding	ARHGEF2-001	155948318	1	3905	11.43825	3905	1	3	-338.5|-1113|-1973.5	11|5|5	0.323943661971831|0.25|0.272727272727273	0.0845070422535211|0.0357142857142857|0.0303030303030303	0.0140845070422535|0.0357142857142857|0.0909090909090909	71|28|33	NA|NA|NA	NA|NA|NA	NA|NA|NA	-|+|-	4	1554.5|1168.5|767.5|308	4|4|5|4	0.0869565217391304|0.130434782608696|0|0.0555555555555556	0.0869565217391304|0.130434782608696|0.12|0.0555555555555556	0.130434782608696|0.173913043478261|0.16|0.111111111111111	23|23|25|18	NA|NA|NA|NA	NA|NA|NA|NA	NA|NA|NA|NA	-|+|-|-	0.525094981	3893	3.51579443813594	-2.49247629807954	5.79249120717296
10374	chr1	-	ENSG00000227010.1	processed_transcript,	processed_transcript	0.106073	0.099268	10681	155966114	155972355	6242	processed_transcript	PUTATIVE	RP11-336K24.6	processed_transcript	RP11-336K24.6-001	155972355	1	3908	0.1026705	3908	1	0	NA	NA	NA	NA	NA	NA	NA	NA	NA	NA	0	NA	NA	NA	NA	NA	NA	NA	NA	NA	NA	0.474305139	3896	-3.28390637883366	-4.62946520125007	2.75693960138342
10383	chr1	-	ENSG00000163479.9	retained_intron,nonsense_mediated_decay,	protein_coding	369.718	350.168	10690	155981601	155990705	9105	protein_coding	KNOWN	SSR2	nonsense_mediated_decay	SSR2-011	155990705	1	3910	719.886	3910	1	0	NA	NA	NA	NA	NA	NA	NA	NA	NA	NA	2	204.5|112.5	3|5	0|0.172413793103448	0.117647058823529|0.0689655172413793	0|0.103448275862069	17|29	NA|NA	NA|NA	NA|NA	+|-	0.475504899	3898	9.49162465152918	-2.09541340835991	5.39889781997776
10409	chr1	-	ENSG00000254726.1	protein_coding,	protein_coding	0.31822	0.099268	10716	156046280	156051789	5510	protein_coding	KNOWN	MEX3A	protein_coding	MEX3A-001	156051789	1	3915	0.208744	3915	1	6	-194|-523.5|-692.5|-763.5|-837|-1140.5	9|5|4|4|5|4	0.112903225806452|0.0512820512820513|0.173913043478261|0.111111111111111|0.03125|0.04	0.0806451612903226|0.282051282051282|0.0434782608695652|0.148148148148148|0.21875|0.12	0.161290322580645|0.0256410256410256|0.0434782608695652|0.0740740740740741|0|0	62|39|23|27|32|25	NA|NA|NA|7|NA|NA	NA|NA|NA|4|NA|NA	NA|NA|NA|1|NA|NA	-|+|+|-|+|-	2	1487.5|186.5	4|3	0.04|0.111111111111111	0.04|0.0740740740740741	0.16|0.037037037037037	25|27	NA|NA	NA|NA	NA|NA	-|-	0.541891622	3903	-2.26019336458042	-4.09786315178329	2.87617470342507
10452	chr1	+	ENSG00000160785.7	protein_coding,	protein_coding	9.28141	12.0114	10760	156163880	156182587	18708	protein_coding	KNOWN	SLC25A44	protein_coding	SLC25A44-001	156163880	1	3919	10.646405	3919	1	0	NA	NA	NA	NA	NA	NA	NA	NA	NA	NA	0	NA	NA	NA	NA	NA	NA	NA	NA	NA	NA	0.445310938	3907	3.4122944488839	-1.43556920131885	6.39235881955475
10468	chr1	-	ENSG00000160781.9	processed_transcript,	protein_coding	0	0.049634	10776	156214565	156217805	3241	protein_coding	KNOWN	PAQR6	processed_transcript	PAQR6-008	156217805	1	3922	0.024817	3922	1	2	-82|-523	5|2	0.235294117647059|0.0416666666666667	0.117647058823529|0	0.0294117647058824|0	34|24	NA|NA	NA|NA	NA|NA	+|-	2	1360.5|692	4|5	0.111111111111111|0.166666666666667	0.037037037037037|0.166666666666667	0.222222222222222|0.111111111111111	27|36	NA|NA	NA|NA	NA|NA	+|-	0.570085983	3910	-5.33252746377914	-2.42816980822522	3.39577685686585
10483	chr1	-	ENSG00000198952.5	protein_coding,	protein_coding	33.7313	35.5876	10792	156219017	156252596	33580	protein_coding	KNOWN	SMG5	protein_coding	SMG5-002	156252596	1	3923	34.65945	3923	1	0	NA	NA	NA	NA	NA	NA	NA	NA	NA	NA	1	273.5	7	0	0.292682927	0.073170732	41	NA	NA	NA	-	0.525894821	3911	5.11517685588954	-1.7446757893191	6.5394443557295
10487	chr1	+	ENSG00000163472.13	protein_coding,	protein_coding	1.53806	1.93573	10796	156252744	156261739	8996	protein_coding	KNOWN	TMEM79	protein_coding	TMEM79-004	156252744	1	3924	1.736895	3924	1	1	-421.5	7	0	0.292682927	0.073170732	41	NA	NA	NA	-	0	NA	NA	NA	NA	NA	NA	NA	NA	NA	NA	0.485102979	3912	0.796510541867546	-1.91103895927517	6.7785766931578
10502	chr1	-	ENSG00000198715.6	processed_transcript,protein_coding,	protein_coding	91.2761	77.5283	10811	156263214	156265445	2232	protein_coding	KNOWN	C1orf85	protein_coding	C1orf85-006	156265445	1	3925	168.8044	3925	1	0	NA	NA	NA	NA	NA	NA	NA	NA	NA	NA	4	1072|480.5|397|209.5	4|5|4|4	0.125|0.189189189189189|0.15|0.148148148148148	0.0416666666666667|0.135135135135135|0.2|0.148148148148148	0.166666666666667|0.108108108108108|0.05|0.111111111111111	24|37|20|27	NA|NA|1|NA	NA|NA|3|NA	NA|NA|4|NA	+|+|+|-	0.467906419	3913	7.39920869912461	-3.70273106380316	6.27775436835137
10533	chr1	+	ENSG00000132677.8	protein_coding,retained_intron,protein_coding,protein_coding,nonsense_mediated_decay,protein_coding,nonsense_mediated_decay,protein_coding,protein_coding,nonsense_mediated_decay,	protein_coding	20.1009	16.1311	10842	156339003	156355009	16007	protein_coding	KNOWN	RHBG	protein_coding	RHBG-201	156339003	1	3934	181.16	3934	1	1	-1319.5	4	0.238095238	0	0.095238095	21	NA	NA	NA	-	1	1684.5	4	0.047619048	0.047619048	0.142857143	21	NA	NA	NA	-	0.539692062	3922	7.50112063427539	-3.63843827894829	7.28903405484571
10537	chr1	+	ENSG00000237390.1	processed_transcript,	lincRNA	0	0.049634	10847	156358018	156365401	7384	lincRNA	NOVEL	RP11-139I14.2	processed_transcript	RP11-139I14.2-001	156358018	1	3935	0.024817	3935	1	1	-536	4	0.227272727	0.090909091	0.090909091	22	NA	NA	NA	-	3	331|829|1576	4|5|4	0.0384615384615385|0.230769230769231|0.230769230769231	0.307692307692308|0|0.0384615384615385	0|0.0769230769230769|0.0384615384615385	26|26|26	NA|NA|4	NA|NA|4	NA|NA|5	-|-|+	0.547890422	3923	-5.33252746377914	-3.4932802732236	3.99211653020804
10559	chr1	-	ENSG00000236947.1	processed_transcript,	processed_transcript	0.212147	0	10873	156422689	156426369	3681	processed_transcript	NOVEL	RP11-98G7.1	processed_transcript	RP11-98G7.1-002	156426369	1	3939	0.1060735	3939	1	1	-1057.5	4	0.068965517	0.068965517	0.068965517	29	NA	NA	NA	+	0	NA	NA	NA	NA	NA	NA	NA	NA	NA	NA	0.51009798	3927	-3.23686381746411	-1.33278550222654	4.50987366153598
10576	chr1	+	ENSG00000187862.6	processed_transcript,	protein_coding	0.0530366	0.099268	10891	156551852	156555836	3985	protein_coding	KNOWN	TTC24	processed_transcript	TTC24-002	156551852	1	3945	0.0761523	3945	1	0	NA	NA	NA	NA	NA	NA	NA	NA	NA	NA	3	34|391|1158	4|5|5	0.192307692307692|0.1|0.125	0.115384615384615|0.166666666666667|0.15	0.115384615384615|0.133333333333333|0.125	26|30|40	2|NA|NA	7|NA|NA	4|NA|NA	+|+|+	0.50269946	3933	-3.71496857921469	-4.31614004095849	4.54272904101179
10614	chr1	-	ENSG00000229953.1	processed_transcript,	processed_transcript	53.4079	55.5901	10930	156616299	156631216	14918	processed_transcript	PUTATIVE	RP11-284F21.7	processed_transcript	RP11-284F21.7-001	156631216	1	3952	54.499	3952	1	2	-584|-1711	4|4	0.133333333333333|0.227272727272727	0|0.0909090909090909	0.166666666666667|0	30|22	NA|NA	NA|NA	NA|NA	-|+	1	1603	4	0.2	0.05	0.05	20	1	4	2	+	0.556288742	3940	5.76815785306543	-1.85777736941448	7.60416332320971
10628	chr1	+	ENSG00000143303.7	protein_coding,	protein_coding	2.5988	2.28317	10944	156698267	156706741	8475	protein_coding	KNOWN	RRNAD1	protein_coding	RRNAD1-001	156698267	1	3958	2.440985	3958	1	0	NA	NA	NA	NA	NA	NA	NA	NA	NA	NA	1	152	5	0	0.133333333	0.066666667	30	NA	NA	NA	+	0.49390122	3946	1.28746342969829	-2.63665174691889	4.78920802331322
10629	chr1	-	ENSG00000143319.11	protein_coding,	protein_coding	0.424293	0.545974	10945	156692395	156698591	6197	protein_coding	KNOWN	ISG20L2	protein_coding	ISG20L2-002	156698591	1	3959	0.4851335	3959	1	0	NA	NA	NA	NA	NA	NA	NA	NA	NA	NA	1	172	5	0	0.133333333	0.066666667	30	NA	NA	NA	+	0.48970206	3947	-1.04354628926691	-3.00461242943439	4.27712245747083
10630	chr1	+	ENSG00000143303.7	protein_coding,	protein_coding	0.47733	0.843778	10946	156698741	156704262	5522	protein_coding	KNOWN	RRNAD1	protein_coding	RRNAD1-009	156698741	1	3960	0.660554	3960	1	1	-322	5	0	0.133333333	0.066666667	30	NA	NA	NA	+	0	NA	NA	NA	NA	NA	NA	NA	NA	NA	NA	0.514297141	3948	-0.598251588906933	-3.40658306488667	6.59648210221182
10653	chr1	-	ENSG00000143321.13	protein_coding,	protein_coding	25.8288	19.258	10969	156711899	156721536	9638	protein_coding	KNOWN	HDGF	protein_coding	HDGF-001	156721536	1	3966	22.5434	3966	1	0	NA	NA	NA	NA	NA	NA	NA	NA	NA	NA	0	NA	NA	NA	NA	NA	NA	NA	NA	NA	NA	0.485702859	3954	4.49463321435586	-1.54581988362024	5.49602791694994
10951	chr1	-	ENSG00000132716.10	processed_transcript,	protein_coding	0.15911	0.049634	11276	160187137	160189104	1968	protein_coding	KNOWN	DCAF8	processed_transcript	DCAF8-014	160189104	1	4099	0.104372	4099	1	0	NA	NA	NA	NA	NA	NA	NA	NA	NA	NA	0	NA	NA	NA	NA	NA	NA	NA	NA	NA	NA	0.437312537	4087	-3.26019336458042	-4.89106480618434	2.24423327778133
10957	chr1	+	ENSG00000228606.1	processed_transcript,	processed_transcript	0.901623	0.397072	11282	160231534	160232568	1035	processed_transcript	NOVEL	RP11-574F21.2	processed_transcript	RP11-574F21.2-001	160231534	1	4100	0.6493475	4100	1	0	NA	NA	NA	NA	NA	NA	NA	NA	NA	NA	1	198	5	0.133333333	0.1	0.133333333	30	NA	NA	NA	+	0.398320336	4088	-0.622937348008093	-3.68036357722648	7.45753526122614
10964	chr1	-	ENSG00000132716.10	protein_coding,	protein_coding	54.8399	55.6397	11289	160187265	160232275	45011	protein_coding	KNOWN	DCAF8	protein_coding	DCAF8-201	160232275	1	4101	55.2398	4101	1	0	NA	NA	NA	NA	NA	NA	NA	NA	NA	NA	1	543	5	0.133333333	0.1	0.133333333	30	NA	NA	NA	+	0.440911818	4089	5.78763619110298	-1.37819050907537	7.8486480358162
10984	chr1	-	ENSG00000122218.10	retained_intron,	protein_coding	1.16681	1.48902	11310	160264593	160269069	4477	protein_coding	KNOWN	COPA	retained_intron	COPA-004	160269069	1	4104	1.327915	4104	1	0	NA	NA	NA	NA	NA	NA	NA	NA	NA	NA	0	NA	NA	NA	NA	NA	NA	NA	NA	NA	NA	0.379124175	4092	0.409162802555965	-5.82819874275166	3.0104948741347
10990	chr1	-	ENSG00000122218.10	protein_coding,	protein_coding	72.8193	74.7985	11316	160259063	160313038	53976	protein_coding	KNOWN	COPA	protein_coding	COPA-001	160313038	1	4107	73.8089	4107	1	2	-177.5|-525	4|4	0.0857142857142857|0	0.2|0.0416666666666667	0.142857142857143|0.25	35|24	NA|NA	NA|NA	NA|NA	+|-	0	NA	NA	NA	NA	NA	NA	NA	NA	NA	NA	0.454909018	4095	6.20572288423129	-2.06974865169297	8.34892821089825
11088	chr1	-	ENSG00000158769.11	protein_coding,	protein_coding	0.15911	0.099268	11414	160968450	161008784	40335	protein_coding	KNOWN	F11R	protein_coding	F11R-201	161008784	1	4144	0.129189	4144	1	1	-218	4	0.166666667	0.166666667	0.041666667	24	4	6	1	-	1	845.5	4	0.074074074	0.185185185	0.148148148	27	7	2	4	+	0.50529894	4132	-2.9524448601578	-4.95675067105504	2.36971997605121
11115	chr1	+	ENSG00000162755.9	protein_coding,protein_coding,	protein_coding	0.31822	0.198536	11442	161068184	161070136	1953	protein_coding	KNOWN	KLHDC9	protein_coding	KLHDC9-001	161068184	1	4150	0.516756	4150	1	0	NA	NA	NA	NA	NA	NA	NA	NA	NA	NA	2	126.5|1438.5	5|3	0.103448275862069|0.2	0.172413793103448|0	0.0344827586206897|0.08	29|25	NA|NA	NA|NA	NA|NA	-|+	0.476904619	4138	-0.952444860157796	-0.988215288351122	5.81675347912298
11160	chr1	+	ENSG00000143258.11	protein_coding,	protein_coding	7.9555	5.50938	11487	161129269	161135513	6245	protein_coding	KNOWN	USP21	protein_coding	USP21-001	161129269	1	4160	6.73244	4160	1	0	NA	NA	NA	NA	NA	NA	NA	NA	NA	NA	3	122|237.5|311.5	4|3|5	0.111111111111111|0.0869565217391304|0.108108108108108	0.194444444444444|0.0869565217391304|0.216216216216216	0.0833333333333333|0.0869565217391304|0.0810810810810811	36|23|37	NA|NA|NA	NA|NA|NA	NA|NA|NA	+|+|+	0.468906219	4148	2.75112946738002	-1.43361926520311	6.8529028512996
11172	chr1	+	ENSG00000143224.11	retained_intron,processed_transcript,	protein_coding	11.8802	9.03339	11499	161136229	161139510	3282	protein_coding	KNOWN	PPOX	processed_transcript	PPOX-009	161136229	1	4161	20.91359	4161	1	1	-1252	5	0.15625	0.0625	0.15625	32	NA	NA	NA	-	1	1901	6	0.147058824	0	0.235294118	34	NA	NA	NA	-	0.519696061	4149	4.38636882925089	-2.04037224559413	6.33133273757389
11196	chr1	-	ENSG00000158850.9	processed_transcript,protein_coding,	protein_coding	30.2309	30.0286	11525	161141102	161147287	6186	protein_coding	KNOWN	B4GALT3	protein_coding	B4GALT3-002	161147287	1	4162	60.2595	4162	1	1	-1863.5	6	0.310344828	0.034482759	0	29	NA	NA	NA	-	2	1407.5|1025.5	4|4	0.2|0.0909090909090909	0.04|0.212121212121212	0.12|0.121212121212121	25|33	NA|NA	NA|NA	NA|NA	+|+	0.462707459	4150	5.91311679718394	-1.78437849064428	6.64473895267499
11201	chr1	-	ENSG00000158859.8	protein_coding,	protein_coding	0.63644	0.645242	11530	161165769	161168843	3075	protein_coding	KNOWN	ADAMTS4	protein_coding	ADAMTS4-002	161168843	1	4165	0.640841	4165	1	3	-862|-923|-1880	4|5|4	0.208333333333333|0.133333333333333|0.0714285714285714	0.125|0.0333333333333333|0.142857142857143	0.0833333333333333|0.2|0.142857142857143	24|30|28	4|NA|NA	3|NA|NA	4|NA|NA	-|-|-	3	1819|1670|1319	5|5|4	0.15625|0.3125|0.1	0.1875|0|0	0.125|0|0.1	32|32|20	NA|NA|NA	NA|NA|NA	NA|NA|NA	+|+|+	0.536492701	4153	-0.641961642826666	-4.37479306430829	3.93504555807616
11226	chr1	-	ENSG00000158874.6	protein_coding,processed_transcript,	protein_coding	8846.41	7550.87	11555	161192082	161193418	1337	protein_coding	KNOWN	APOA2	protein_coding	APOA2-001	161193418	1	4168	16397.28	4168	1	2	-499.5|-1503.5	8|4	0.207547169811321|0.19047619047619	0.0566037735849057|0	0.169811320754717|0.0952380952380952	53|21	NA|4	NA|1	NA|4	+|-	1	1372	4	0.3	0.033333333	0.1	30	NA	NA	NA	-	0.514297141	4156	14.0011688982975	-3.46911418392886	7.71789577509664
11229	chr1	+	ENSG00000158882.7	processed_transcript,protein_coding,	protein_coding	1.80325	2.3328	11558	161195850	161200405	4556	protein_coding	KNOWN	TOMM40L	processed_transcript	TOMM40L-003	161195850	1	4169	4.13605	4169	1	2	-1932.5|-928.5	8|4	0.207547169811321|0.19047619047619	0.0566037735849057|0	0.169811320754717|0.0952380952380952	53|21	NA|4	NA|1	NA|4	+|-	1	359.5	4	0.096774194	0.096774194	0.129032258	31	NA	NA	NA	+	0.49970006	4157	2.0482536262515	-2.81704329177285	5.33014273985319
11243	chr1	-	ENSG00000143257.6	protein_coding,protein_coding,nonsense_mediated_decay,protein_coding,protein_coding,protein_coding,protein_coding,protein_coding,protein_coding,protein_coding,protein_coding,nonsense_mediated_decay,protein_coding,protein_coding,nonsense_mediated_decay,nonsense_mediated_decay,protein_coding,protein_coding,protein_coding,	protein_coding	0	0.049634	11572	161199527	161207891	8365	protein_coding	KNOWN	NR1I3	protein_coding	NR1I3-019	161207891	1	4170	0.471523	4170	1	0	NA	NA	NA	NA	NA	NA	NA	NA	NA	NA	0	NA	NA	NA	NA	NA	NA	NA	NA	NA	NA	0.454709058	4158	-1.08459995033556	-2.74951373965708	3.47072010169046
11261	chr1	+	ENSG00000143252.9	protein_coding,protein_coding,	protein_coding	20.0479	13.6494	11590	161284178	161332223	48046	protein_coding	KNOWN	SDHC	protein_coding	SDHC-006	161284178	1	4173	33.6973	4173	1	0	NA	NA	NA	NA	NA	NA	NA	NA	NA	NA	1	195	3	0.25	0.05	0	20	NA	NA	NA	-	0.462907419	4161	5.07456109482088	-1.76267615071274	7.60475338925432
11265	chr1	-	ENSG00000188931.3	protein_coding,	protein_coding	0.0530366	0	11594	161334521	161337664	3144	protein_coding	KNOWN	C1orf192	protein_coding	C1orf192-001	161337664	1	4174	0.0265183	4174	1	0	NA	NA	NA	NA	NA	NA	NA	NA	NA	NA	0	NA	NA	NA	NA	NA	NA	NA	NA	NA	NA	0.419716057	4162	-5.23686789773981	-2.23310130867942	3.85283864533254
11340	chr1	+	ENSG00000081721.6	processed_transcript,	protein_coding	6.9478	6.15462	11671	161719595	161721571	1977	protein_coding	KNOWN	DUSP12	processed_transcript	DUSP12-004	161719595	1	4202	6.55121	4202	1	1	-203.5	4	0.259259259	0.074074074	0.074074074	27	NA	NA	NA	+	0	NA	NA	NA	NA	NA	NA	NA	NA	NA	NA	0.433113377	4190	2.71176139516595	-1.81045492142776	7.17395100937503
11344	chr1	+	ENSG00000118217.5	protein_coding,	protein_coding	12.8879	16.7267	11675	161736084	161933860	197777	protein_coding	KNOWN	ATF6	protein_coding	ATF6-001	161736084	1	4204	14.8073	4204	1	0	NA	NA	NA	NA	NA	NA	NA	NA	NA	NA	0	NA	NA	NA	NA	NA	NA	NA	NA	NA	NA	0.401319736	4192	3.88823669488441	-2.81196884164814	7.78365050895268
11353	chr1	+	ENSG00000198929.8	protein_coding,	protein_coding	0.583403	0.49634	11686	162039564	162338241	298678	protein_coding	KNOWN	NOS1AP	protein_coding	NOS1AP-008	162039564	1	4208	0.5398715	4208	1	1	-211.5	4	0.047619048	0.238095238	0	21	3	2	2	+	1	287	4	0.076923077	0.192307692	0.076923077	26	3	6	2	-	0.416116777	4196	-0.889312036451612	-1.86774698589454	5.79128292426896
11392	chr1	+	ENSG00000132196.8	protein_coding,	protein_coding	0.15911	0.099268	11728	162760579	162767939	7361	protein_coding	KNOWN	HSD17B7	protein_coding	HSD17B7-007	162760579	1	4225	0.129189	4225	1	0	NA	NA	NA	NA	NA	NA	NA	NA	NA	NA	0	NA	NA	NA	NA	NA	NA	NA	NA	NA	NA	0.426714657	4213	-2.9524448601578	-3.10406454852769	6.55988956524494
11428	chr1	-	ENSG00000232995.2	processed_transcript,processed_transcript,processed_transcript,	processed_transcript	3.07613	2.72987	11764	163218109	163291542	73434	processed_transcript	NOVEL	RP11-267N12.3	processed_transcript	RP11-267N12.3-005	163291542	1	4236	8.709	4236	1	0	NA	NA	NA	NA	NA	NA	NA	NA	NA	NA	0	NA	NA	NA	NA	NA	NA	NA	NA	NA	NA	0.397920416	4224	3.12250707268573	-1.80590782985645	7.21221533551952
11493	chr1	+	ENSG00000236206.1	processed_transcript,	processed_transcript	0	0.049634	11829	165567700	165592568	24869	processed_transcript	PUTATIVE	RP11-306I1.2	processed_transcript	RP11-306I1.2-001	165567700	1	4271	0.024817	4271	1	1	-103	4	0.111111111	0.055555556	0.111111111	18	NA	NA	NA	+	1	403.5	5	0.275862069	0.034482759	0.068965517	29	NA	NA	NA	+	0.403719256	4259	-5.33252746377914	-3.17265569965981	5.32798936290948
11507	chr1	-	ENSG00000206990.1	misc_RNA,	misc_RNA	0.31822	0.24817	11843	165631822	165631924	103	misc_RNA	NOVEL	Y_RNA.529	misc_RNA	Y_RNA.529-201	165631924	1	4273	0.283195	4273	1	0	NA	NA	NA	NA	NA	NA	NA	NA	NA	NA	0	NA	NA	NA	NA	NA	NA	NA	NA	NA	NA	0.396520696	4261	-1.82013230100206	-5.77983842501134	2.40286985468809
11514	chr1	-	ENSG00000143149.8	processed_transcript,	protein_coding	10.4482	8.98376	11850	165649724	165667777	18054	protein_coding	KNOWN	ALDH9A1	processed_transcript	ALDH9A1-004	165667777	1	4277	9.71598	4277	1	1	-74	8	0.045454545	0.25	0	44	NA	NA	NA	+	1	348	4	0.166666667	0.055555556	0.111111111	18	2	2	2	-	0.439712058	4265	3.2803595202403	-2.15520621339475	6.11894953904553
11519	chr1	-	ENSG00000143183.10	processed_transcript,	protein_coding	434.529	394.144	11855	165696775	165738113	41339	protein_coding	KNOWN	TMCO1	processed_transcript	TMCO1-005	165738113	1	4281	414.3365	4281	1	0	NA	NA	NA	NA	NA	NA	NA	NA	NA	NA	0	NA	NA	NA	NA	NA	NA	NA	NA	NA	NA	0.425114977	4269	8.69465910651839	-0.799618626512556	7.04594535319753
11523	chr1	+	ENSG00000224358.1	processed_transcript,	lincRNA	0.106073	0.049634	11859	165738166	165744413	6248	lincRNA	NOVEL	RP11-466F5.8	processed_transcript	RP11-466F5.8-001	165738166	1	4282	0.0778535	4282	1	0	NA	NA	NA	NA	NA	NA	NA	NA	NA	NA	0	NA	NA	NA	NA	NA	NA	NA	NA	NA	NA	0.415316937	4270	-3.68309429087966	-0.852821041465375	7.35959505004231
11524	chr1	-	ENSG00000143183.10	protein_coding,	protein_coding	0	0.049634	11860	165696032	165738417	42386	protein_coding	KNOWN	TMCO1	protein_coding	TMCO1-001	165738417	1	4283	0.024817	4283	1	0	NA	NA	NA	NA	NA	NA	NA	NA	NA	NA	0	NA	NA	NA	NA	NA	NA	NA	NA	NA	NA	0.412317536	4271	-5.33252746377914	-3.20289071263527	4.31892474126267
11604	chr1	-	ENSG00000143162.7	protein_coding,	protein_coding	18.0855	18.8609	11943	167510250	167523004	12755	protein_coding	KNOWN	CREG1	protein_coding	CREG1-001	167523004	1	4325	18.4732	4325	1	2	-638|-1315	4|4	0.214285714285714|0.147058823529412	0.0714285714285714|0.0588235294117647	0.142857142857143|0.147058823529412	28|34	NA|NA	NA|NA	NA|NA	+|-	0	NA	NA	NA	NA	NA	NA	NA	NA	NA	NA	0.432713457	4313	4.2073618921364	-1.15810414366644	4.58772552575424
11630	chr1	-	ENSG00000143158.6	protein_coding,	protein_coding	50.1196	50.726	11970	167885967	167905278	19312	protein_coding	KNOWN	BRP44	protein_coding	BRP44-001	167905278	1	4334	50.4228	4334	1	1	-820	4	0.166666667	0	0	24	NA	NA	NA	-	0	NA	NA	NA	NA	NA	NA	NA	NA	NA	NA	0.430313937	4322	5.65600432879095	-1.59945763479161	8.16376643895451
11657	chr1	+	ENSG00000143155.8	protein_coding,	protein_coding	9.70571	7.74291	11997	168148171	168169950	21780	protein_coding	KNOWN	TIPRL	protein_coding	TIPRL-001	168148171	1	4345	8.72431	4345	1	0	NA	NA	NA	NA	NA	NA	NA	NA	NA	NA	0	NA	NA	NA	NA	NA	NA	NA	NA	NA	NA	0.437512498	4333	3.12504103402231	-1.7563260177775	6.62551609512394
11702	chr1	-	ENSG00000143156.9	processed_transcript,processed_transcript,	protein_coding	39.141	30.0782	12044	169199990	169337035	137046	protein_coding	KNOWN	NME7	processed_transcript	NME7-005	169337035	1	4373	69.2192	4373	1	0	NA	NA	NA	NA	NA	NA	NA	NA	NA	NA	0	NA	NA	NA	NA	NA	NA	NA	NA	NA	NA	0.369326135	4361	6.11310036255798	-1.78139987077866	5.88722325297454
11706	chr1	+	ENSG00000117475.9	protein_coding,protein_coding,protein_coding,	protein_coding	8.43283	7.49474	12048	169337208	169365778	28571	protein_coding	KNOWN	BLZF1	protein_coding	BLZF1-002	169337208	1	4374	23.891355	4374	1	0	NA	NA	NA	NA	NA	NA	NA	NA	NA	NA	0	NA	NA	NA	NA	NA	NA	NA	NA	NA	NA	0.407118576	4362	4.57841677355999	-2.19099064665003	5.4268419576475
11716	chr1	-	ENSG00000117479.7	protein_coding,	protein_coding	38.4516	39.8561	12058	169433147	169455146	22000	protein_coding	KNOWN	SLC19A2	protein_coding	SLC19A2-003	169455146	1	4379	39.15385	4379	1	0	NA	NA	NA	NA	NA	NA	NA	NA	NA	NA	1	372.5	4	0.105263158	0.157894737	0	19	3	2	1	-	0.418516297	4367	5.29108226965317	-1.92357228653271	7.32468826283676
11720	chr1	-	ENSG00000198734.6	protein_coding,	protein_coding	62.9545	81.0524	12062	169515727	169555719	39993	protein_coding	KNOWN	F5	protein_coding	F5-201	169555719	1	4381	72.00345	4381	1	0	NA	NA	NA	NA	NA	NA	NA	NA	NA	NA	0	NA	NA	NA	NA	NA	NA	NA	NA	NA	NA	0.407318536	4369	6.16999412892352	-2.42351851371104	7.34580446501921
11741	chr1	+	ENSG00000000460.11	processed_transcript,	protein_coding	0.63644	0.24817	12086	169763871	169773521	9651	protein_coding	KNOWN	C1orf112	processed_transcript	C1orf112-005	169763871	1	4388	0.442305	4388	1	1	-737	4	0.15	0.05	0.05	20	NA	NA	NA	-	0	NA	NA	NA	NA	NA	NA	NA	NA	NA	NA	0.392321536	4376	-1.17688654373279	-2.5683150479297	5.13058532874063
11747	chr1	+	ENSG00000000460.11	processed_transcript,protein_coding,processed_transcript,	protein_coding	12.7288	9.57937	12092	169764220	169795258	31039	protein_coding	KNOWN	C1orf112	protein_coding	C1orf112-202	169764220	1	4390	33.462255	4390	1	1	-1086	4	0.15	0.05	0.05	20	NA	NA	NA	-	0	NA	NA	NA	NA	NA	NA	NA	NA	NA	NA	0.411517696	4378	5.06446276583735	-1.87778582244757	6.36734322929038
11763	chr1	-	ENSG00000075945.8	protein_coding,protein_coding,	protein_coding	5.9401	6.45242	12108	169890467	170043836	153370	protein_coding	KNOWN	KIFAP3	protein_coding	KIFAP3-001	170043836	1	4398	12.39252	4398	1	0	NA	NA	NA	NA	NA	NA	NA	NA	NA	NA	0	NA	NA	NA	NA	NA	NA	NA	NA	NA	NA	0.353729254	4386	3.63139768202948	-1.46235209998316	5.36213348190404
11775	chr1	-	ENSG00000231407.1	processed_transcript,	processed_transcript	0.0530366	0.099268	12120	170479102	170501141	22040	processed_transcript	NOVEL	RP11-576I22.2	processed_transcript	RP11-576I22.2-001	170501141	1	4405	0.0761523	4405	1	0	NA	NA	NA	NA	NA	NA	NA	NA	NA	NA	0	NA	NA	NA	NA	NA	NA	NA	NA	NA	NA	0.381723655	4393	-3.71496857921469	-1.41965762536117	6.54933662500734
11779	chr1	+	ENSG00000120370.6	processed_transcript,protein_coding,	protein_coding	3.55346	2.4817	12124	170501313	170522974	21662	protein_coding	KNOWN	GORAB	processed_transcript	GORAB-003	170501313	1	4406	6.03516	4406	1	0	NA	NA	NA	NA	NA	NA	NA	NA	NA	NA	0	NA	NA	NA	NA	NA	NA	NA	NA	NA	NA	0.404919016	4394	2.59339201922333	-1.69245026507038	6.28420330727842
11780	chr1	-	ENSG00000231407.1	processed_transcript,	processed_transcript	0.0530366	0.049634	12125	170431350	170501788	70439	processed_transcript	NOVEL	RP11-576I22.2	processed_transcript	RP11-576I22.2-004	170501788	1	4407	0.0513353	4407	1	0	NA	NA	NA	NA	NA	NA	NA	NA	NA	NA	0	NA	NA	NA	NA	NA	NA	NA	NA	NA	NA	0.357528494	4395	-4.28390497366436	-4.70647406957074	6.28545415042674
11898	chr1	-	ENSG00000135845.4	processed_transcript,	protein_coding	10.3421	15.9822	12247	172362274	172413223	50950	protein_coding	KNOWN	PIGC	processed_transcript	PIGC-002	172413223	1	4463	26.3243	4463	1	0	NA	NA	NA	NA	NA	NA	NA	NA	NA	NA	1	269	6	0.133333333	0.066666667	0.1	30	NA	NA	NA	+	0.438312338	4451	4.71832326336701	-1.94730035494476	6.84981926822424
11900	chr1	-	ENSG00000135845.4	protein_coding,	protein_coding	10.4482	16.0814	12250	172410598	172413230	2633	protein_coding	KNOWN	PIGC	protein_coding	PIGC-001	172413230	1	4465	13.2648	4465	1	0	NA	NA	NA	NA	NA	NA	NA	NA	NA	NA	1	276	6	0.133333333	0.066666667	0.1	30	NA	NA	NA	+	0.437712458	4452	3.72953101838587	-1.9907904466272	6.87071990727182
11904	chr1	+	ENSG00000094975.8	protein_coding,	protein_coding	0.742513	0.794144	12255	172502357	172580971	78615	protein_coding	KNOWN	C1orf9	protein_coding	C1orf9-001	172502357	1	4467	0.7683285	4467	1	2	-337.5|-215.5	4|4	0.0526315789473684|0.037037037037037	0.210526315789474|0.222222222222222	0.0526315789473684|0.111111111111111	19|27	NA|3	NA|6	NA|4	+|+	0	NA	NA	NA	NA	NA	NA	NA	NA	NA	NA	0.410717856	4454	-0.380204825617038	-2.47874017413265	6.86440418113673
11917	chr1	-	ENSG00000117586.5	protein_coding,	protein_coding	22.3815	21.6404	12268	173154838	173174612	19775	protein_coding	KNOWN	TNFSF4	protein_coding	TNFSF4-201	173174612	1	4477	22.01095	4477	1	0	NA	NA	NA	NA	NA	NA	NA	NA	NA	NA	0	NA	NA	NA	NA	NA	NA	NA	NA	NA	NA	0.393321336	4464	4.46014950866347	-4.44219091583069	4.90789089075345
11958	chr1	-	ENSG00000120334.11	processed_transcript,	protein_coding	0.79555	0.397072	12309	173769550	173793473	23924	protein_coding	KNOWN	CENPL	processed_transcript	CENPL-005	173793473	1	4496	0.596311	4496	1	0	NA	NA	NA	NA	NA	NA	NA	NA	NA	NA	1	249	4	0.181818182	0.090909091	0.136363636	22	5	1	3	-	0.414717057	4483	-0.745863144844922	-2.88468971587139	6.73735156672647
11961	chr1	+	ENSG00000117593.8	protein_coding,	protein_coding	33.0949	32.6096	12312	173793797	173827682	33886	protein_coding	KNOWN	DARS2	protein_coding	DARS2-201	173793797	1	4497	32.85225	4497	1	1	-573	4	0.181818182	0.090909091	0.136363636	22	5	1	3	-	0	NA	NA	NA	NA	NA	NA	NA	NA	NA	NA	0.414117177	4484	5.03792027677988	-3.02678109273179	6.96702570579529
11965	chr1	+	ENSG00000231792.1	processed_transcript,	processed_transcript	0	0.049634	12316	173831290	173833079	1790	processed_transcript	NOVEL	RP5-1198E17.1	processed_transcript	RP5-1198E17.1-001	173831290	1	4500	0.024817	4500	1	0	NA	NA	NA	NA	NA	NA	NA	NA	NA	NA	0	NA	NA	NA	NA	NA	NA	NA	NA	NA	NA	0.402519496	4487	-5.33252746377914	-5.32187035361656	2.53565686303593
11966	chr1	-	ENSG00000200710.1	snoRNA,	snoRNA	0.424293	0.545974	12317	173833284	173833360	77	snoRNA	KNOWN	SNORD81	snoRNA	SNORD81-201	173833360	1	4501	0.4851335	4501	1	0	NA	NA	NA	NA	NA	NA	NA	NA	NA	NA	0	NA	NA	NA	NA	NA	NA	NA	NA	NA	NA	0.465306939	4488	-1.04354628926691	-5.76407197124197	2.70893940802121
11967	chr1	-	ENSG00000202394.1	snoRNA,	snoRNA	0.212147	0.049634	12318	173833507	173833583	77	snoRNA	KNOWN	SNORD47	snoRNA	SNORD47-201	173833583	1	4502	0.1308905	4502	1	0	NA	NA	NA	NA	NA	NA	NA	NA	NA	NA	0	NA	NA	NA	NA	NA	NA	NA	NA	NA	NA	0.463107379	4489	-2.93356770425242	-5.74847595974085	2.84342273363554
11972	chr1	-	ENSG00000200729.1	snoRNA,	snoRNA	1.21984	0.943046	12324	173834486	173834570	85	snoRNA	KNOWN	SNORD79	snoRNA	SNORD79-201	173834570	1	4506	1.081443	4506	1	0	NA	NA	NA	NA	NA	NA	NA	NA	NA	NA	0	NA	NA	NA	NA	NA	NA	NA	NA	NA	NA	0.460707858	4493	0.112957626664246	-5.69518054833117	2.64809909267936
11973	chr1	-	ENSG00000208317.1	snoRNA,	snoRNA	0.212147	0.148902	12325	173834760	173834824	65	snoRNA	KNOWN	SNORD78	snoRNA	SNORD78-201	173834824	1	4507	0.1805245	4507	1	0	NA	NA	NA	NA	NA	NA	NA	NA	NA	NA	0	NA	NA	NA	NA	NA	NA	NA	NA	NA	NA	0.463907219	4494	-2.46973344819105	-5.82819874275166	3.70827642575977
11974	chr1	-	ENSG00000206607.1	snoRNA,	snoRNA	0.212147	0.24817	12326	173835106	173835166	61	snoRNA	KNOWN	SNORD44	snoRNA	SNORD44-201	173835166	1	4508	0.2301585	4508	1	0	NA	NA	NA	NA	NA	NA	NA	NA	NA	NA	0	NA	NA	NA	NA	NA	NA	NA	NA	NA	NA	0.472305539	4495	-2.11930037106811	-5.4738670315075	4.79381308983898
11975	chr1	-	ENSG00000234741.2	non_coding,	lincRNA	0.95466	0.694876	12327	173833039	173835344	2306	lincRNA	KNOWN	GAS5	non_coding	GAS5-028	173835344	1	4509	0.824768	4509	1	0	NA	NA	NA	NA	NA	NA	NA	NA	NA	NA	0	NA	NA	NA	NA	NA	NA	NA	NA	NA	NA	0.474905019	4496	-0.277939735916664	-5.58720326112291	4.3151320280736
11976	chr1	-	ENSG00000208313.1	snoRNA,	snoRNA	0.0530366	0	12328	173835439	173835506	68	snoRNA	KNOWN	SNORD77	snoRNA	SNORD77-201	173835506	1	4510	0.0265183	4510	1	1	-1911	3	0.15	0	0.05	20	NA	NA	NA	+	0	NA	NA	NA	NA	NA	NA	NA	NA	NA	NA	0.476704659	4497	-5.23686789773981	-5.28765599156323	4.7514855872081
11977	chr1	-	ENSG00000200016.1	snoRNA,	snoRNA	0.901623	0.297804	12329	173835772	173835853	82	snoRNA	KNOWN	SNORD76	snoRNA	SNORD76-201	173835853	1	4511	0.5997135	4511	1	1	-1564	3	0.15	0	0.05	20	NA	NA	NA	+	0	NA	NA	NA	NA	NA	NA	NA	NA	NA	NA	0.480903819	4498	-0.737654645572349	-5.32187035361656	4.9950325492154
11978	chr1	-	ENSG00000208310.1	snoRNA,	snoRNA	0.15911	0	12330	173836017	173836076	60	snoRNA	KNOWN	SNORD75	snoRNA	SNORD75-201	173836076	1	4512	0.079555	4512	1	1	-1341	3	0.15	0	0.05	20	NA	NA	NA	+	0	NA	NA	NA	NA	NA	NA	NA	NA	NA	NA	0.479904019	4499	-3.65190358356136	-5.48674774741961	5.71557515602291
11984	chr1	-	ENSG00000200954.1	snoRNA,	snoRNA	0.0530366	0.049634	12336	173836809	173836888	80	snoRNA	KNOWN	SNORD74	snoRNA	SNORD74-201	173836888	1	4514	0.0513353	4514	1	1	-529	3	0.15	0	0.05	20	NA	NA	NA	+	0	NA	NA	NA	NA	NA	NA	NA	NA	NA	NA	0.470905819	4501	-4.28390497366436	-4.15582968725109	6.8026482990977
11989	chr1	-	ENSG00000234741.2	non_coding,non_coding,non_coding,non_coding,non_coding,non_coding,	lincRNA	15.4337	20.9952	12341	173833039	173837127	4089	lincRNA	KNOWN	GAS5	non_coding	GAS5-002	173837127	1	4515	109.2867	4515	1	1	-290	3	0.15	0	0.05	20	NA	NA	NA	+	0	NA	NA	NA	NA	NA	NA	NA	NA	NA	NA	0.471505699	4502	6.77197402800723	-1.87990823750841	7.3883136088951
11993	chr1	+	ENSG00000185278.8	protein_coding,protein_coding,	protein_coding	0.15911	0.24817	12345	173837493	173855774	18282	protein_coding	KNOWN	ZBTB37	protein_coding	ZBTB37-203	173837493	1	4516	0.40728	4516	1	1	-76	3	0.15	0	0.05	20	NA	NA	NA	+	0	NA	NA	NA	NA	NA	NA	NA	NA	NA	NA	0.426714657	4503	-1.29590712417299	-1.94674407255636	5.48177709592632
11995	chr1	-	ENSG00000234741.2	non_coding,	lincRNA	0	0.049634	12347	173833039	173838020	4982	lincRNA	KNOWN	GAS5	non_coding	GAS5-027	173838020	1	4517	0.024817	4517	1	0	NA	NA	NA	NA	NA	NA	NA	NA	NA	NA	1	603	3	0.15	0	0.05	20	NA	NA	NA	+	0.414117177	4504	-5.33252746377914	-4.15840361072784	5.08193642697374
11999	chr1	-	ENSG00000117601.8	processed_transcript,	protein_coding	65.6063	74.6992	12351	173881118	173886454	5337	protein_coding	KNOWN	SERPINC1	processed_transcript	SERPINC1-002	173886454	1	4519	70.15275	4519	1	0	NA	NA	NA	NA	NA	NA	NA	NA	NA	NA	1	509	4	0.076923077	0	0.230769231	26	NA	NA	NA	+	0.460507898	4506	6.13242775373752	-2.48196039447747	6.34623371475072
12010	chr1	-	ENSG00000135870.7	protein_coding,	protein_coding	0.95466	1.19122	12362	173900352	173991435	91084	protein_coding	KNOWN	RC3H1	protein_coding	RC3H1-003	173991435	1	4525	1.07294	4525	1	1	-158.5	6	0.064516129	0.161290323	0	31	NA	NA	NA	+	0	NA	NA	NA	NA	NA	NA	NA	NA	NA	NA	0.444111178	4512	0.101569401236353	-1.99480986487177	6.85440474730219
12019	chr1	-	ENSG00000227373.1	processed_transcript,	processed_transcript	0.0530366	0	12371	174084521	174129142	44622	processed_transcript	PUTATIVE	RP11-160H22.5	processed_transcript	RP11-160H22.5-004	174129142	1	4530	0.0265183	4530	1	0	NA	NA	NA	NA	NA	NA	NA	NA	NA	NA	1	1590.5	4	0.260869565	0.043478261	0.086956522	23	1	7	2	+	0.403319336	4517	-5.23686789773981	-3.49816240694998	6.06358938569904
12056	chr1	+	ENSG00000116161.12	retained_intron,	protein_coding	34.8451	33.5526	12408	174969091	174977890	8800	protein_coding	KNOWN	CACYBP	retained_intron	CACYBP-008	174969091	1	4546	34.19885	4546	1	1	-60.5	4	0.052631579	0.052631579	0.052631579	19	NA	NA	NA	+	0	NA	NA	NA	NA	NA	NA	NA	NA	NA	NA	0.422915417	4533	5.09587590750755	-2.21557310402197	6.83450906881778
12091	chr1	-	ENSG00000143207.13	protein_coding,protein_coding,	protein_coding	1.5911	1.14158	12445	175911248	176176370	265123	protein_coding	KNOWN	RFWD2	protein_coding	RFWD2-201	176176370	1	4566	2.73268	4566	1	0	NA	NA	NA	NA	NA	NA	NA	NA	NA	NA	0	NA	NA	NA	NA	NA	NA	NA	NA	NA	NA	0.452909418	4553	1.45031652848804	-2.04572325179673	6.89119080486761
12129	chr1	-	ENSG00000120341.10	protein_coding,	protein_coding	0.371256	0.397072	12483	177914467	177939348	24882	protein_coding	KNOWN	AL359075.1	protein_coding	AL359075.1-003	177939348	1	4587	0.384164	4587	1	0	NA	NA	NA	NA	NA	NA	NA	NA	NA	NA	0	NA	NA	NA	NA	NA	NA	NA	NA	NA	NA	0.413517297	4574	-1.38020576447035	-3.233772958735	5.67039871354428
12140	chr1	-	ENSG00000224687.1	processed_transcript,	lincRNA	0.106073	0.099268	12495	178060644	178062735	2092	lincRNA	NOVEL	RP11-21M7.1	processed_transcript	RP11-21M7.1-002	178062735	1	4594	0.1026705	4594	1	1	-480	6	0.078947368	0.157894737	0.105263158	38	NA	NA	NA	-	2	1779.5|777.5	5|3	0.121212121212121|0.210526315789474	0.121212121212121|0.0526315789473684	0.0909090909090909|0	33|19	NA|NA	NA|NA	NA|NA	+|+	0.456508698	4580	-3.28390637883366	-1.81501639494043	5.5172633592325
12141	chr1	+	ENSG00000075391.11	protein_coding,	protein_coding	0.0530366	0.049634	12496	178062864	178448644	385781	protein_coding	KNOWN	RASAL2	protein_coding	RASAL2-202	178062864	1	4595	0.0513353	4595	1	2	-1908.5|-906.5	5|3	0.121212121212121|0.210526315789474	0.121212121212121|0.0526315789473684	0.0909090909090909|0	33|19	NA|NA	NA|NA	NA|NA	+|+	1	351	6	0.078947368	0.157894737	0.105263158	38	NA	NA	NA	-	0.414317137	4581	-4.28390497366436	-1.88896328232396	5.84221474999732
12157	chr1	+	ENSG00000213057.4	protein_coding,	protein_coding	0.31822	0.545974	12513	178511887	178514635	2749	protein_coding	KNOWN	C1orf220	protein_coding	C1orf220-201	178511887	1	4603	0.432097	4603	1	5	-1185.5|-1113|-537.5|-452.5|-4.5	5|4|5|5|4	0.0740740740740741|0.136363636363636|0.181818181818182|0.257142857142857|0	0.0740740740740741|0|0.212121212121212|0.142857142857143|0.258064516129032	0.111111111111111|0.0909090909090909|0.0303030303030303|0.0571428571428571|0.032258064516129	27|22|33|35|31	NA|NA|NA|NA|NA	NA|NA|NA|NA|NA	NA|NA|NA|NA|NA	-|-|+|+|-	1	286	4	0.083333333	0.083333333	0.083333333	24	NA	NA	NA	+	0.541491702	4589	-1.21057288039144	-2.25359432201763	6.06436569948394
12159	chr1	+	ENSG00000184909.8	protein_coding,	protein_coding	0.15911	0.099268	12515	178511950	178517579	5630	protein_coding	KNOWN	AL513013.1	protein_coding	AL513013.1-201	178511950	1	4604	0.129189	4604	1	5	-1248.5|-1176|-600.5|-515.5|-67.5	5|4|5|5|4	0.0740740740740741|0.136363636363636|0.181818181818182|0.257142857142857|0	0.0740740740740741|0|0.212121212121212|0.142857142857143|0.258064516129032	0.111111111111111|0.0909090909090909|0.0303030303030303|0.0571428571428571|0.032258064516129	27|22|33|35|31	NA|NA|NA|NA|NA	NA|NA|NA|NA|NA	NA|NA|NA|NA|NA	-|-|+|+|-	1	223	4	0.083333333	0.083333333	0.083333333	24	NA	NA	NA	+	0.543491302	4590	-2.9524448601578	-2.44928841189301	5.81681491328291
12171	chr1	-	ENSG00000116194.7	protein_coding,	protein_coding	7.69031	3.57365	12527	178818840	178840187	21348	protein_coding	KNOWN	ANGPTL1	protein_coding	ANGPTL1-001	178840187	1	4611	5.63198	4611	1	0	NA	NA	NA	NA	NA	NA	NA	NA	NA	NA	0	NA	NA	NA	NA	NA	NA	NA	NA	NA	NA	0.372925415	4597	2.49364221075929	-4.39589828590054	3.67748661052817
12206	chr1	+	ENSG00000057252.8	protein_coding,protein_coding,	protein_coding	46.8314	43.9757	12563	179262932	179322997	60066	protein_coding	KNOWN	SOAT1	protein_coding	SOAT1-201	179262932	1	4627	90.8071	4627	1	1	-120.5	4	0.142857143	0.047619048	0.047619048	21	NA	NA	NA	+	1	300.5	5	0.12	0.04	0.08	25	NA	NA	NA	+	0.484103179	4613	6.50473319784778	-1.21758805111795	6.21539917172879
12213	chr1	+	ENSG00000162779.14	protein_coding,protein_coding,processed_transcript,nonsense_mediated_decay,	protein_coding	0	0.198536	12570	179335107	179339214	4108	protein_coding	KNOWN	AXDND1	protein_coding	AXDND1-013	179335107	1	4628	0.397072	4628	1	0	NA	NA	NA	NA	NA	NA	NA	NA	NA	NA	0	NA	NA	NA	NA	NA	NA	NA	NA	NA	NA	0.468906219	4614	-1.33252746377914	-2.42584222833722	5.96690124660726
12239	chr1	-	ENSG00000169905.7	protein_coding,ambiguous_orf,	protein_coding	22.9118	25.909	12598	179809102	179846934	37833	protein_coding	KNOWN	TOR1AIP2	protein_coding	TOR1AIP2-001	179846934	1	4645	48.8208	4645	1	0	NA	NA	NA	NA	NA	NA	NA	NA	NA	NA	0	NA	NA	NA	NA	NA	NA	NA	NA	NA	NA	0.422515497	4631	5.60942403086215	-3.26533064458102	6.55739794423051
12240	chr1	-	ENSG00000256147.1	protein_coding,	protein_coding	22.8058	25.909	12599	179833577	179846941	13365	protein_coding	KNOWN	AL359853.4	protein_coding	AL359853.4-201	179846941	1	4646	24.3574	4646	1	0	NA	NA	NA	NA	NA	NA	NA	NA	NA	NA	0	NA	NA	NA	NA	NA	NA	NA	NA	NA	NA	0.422315537	4632	4.60628823768426	-3.29334480434847	6.55692607115272
12253	chr1	+	ENSG00000135837.11	protein_coding,	protein_coding	3.60649	4.36779	12614	179923908	179966098	42191	protein_coding	KNOWN	CEP350	protein_coding	CEP350-012	179923908	1	4649	3.98714	4649	1	0	NA	NA	NA	NA	NA	NA	NA	NA	NA	NA	0	NA	NA	NA	NA	NA	NA	NA	NA	NA	NA	0.442111578	4635	1.99535426341392	-1.76169737251857	7.48934067695771
12276	chr1	+	ENSG00000143324.9	protein_coding,	protein_coding	34.3677	36.7292	12642	180601168	180855262	254095	protein_coding	KNOWN	XPR1	protein_coding	XPR1-002	180601168	1	4664	35.54845	4664	1	2	-606|-22	5|4	0.0769230769230769|0.0555555555555556	0|0.111111111111111	0.192307692307692|0	26|18	NA|NA	NA|NA	NA|NA	-|+	1	510	6	0.088235294	0.205882353	0.029411765	34	NA	NA	NA	+	0.444911018	4650	5.1517147510453	-1.40430161420623	5.99883656248741
12288	chr1	-	ENSG00000232586.1	processed_transcript,	lincRNA	0.265183	0.049634	12654	180918835	180924023	5189	lincRNA	NOVEL	RP11-46A10.4	processed_transcript	RP11-46A10.4-001	180924023	1	4669	0.1574085	4669	1	2	-1052|-1132	5|4	0.142857142857143|0.272727272727273	0.0357142857142857|0	0.214285714285714|0	28|22	NA|1	NA|1	NA|5	-|-	2	917.5|511	4|5	0|0.0769230769230769	0.210526315789474|0.153846153846154	0|0.0769230769230769	19|26	NA|NA	NA|NA	NA|NA	-|+	0.50609878	4655	-2.66741464694701	-3.84889976811092	4.04816712713985
12298	chr1	+	ENSG00000153029.9	protein_coding,protein_coding,protein_coding,	protein_coding	15.0624	18.2157	12664	181003139	181025689	22551	protein_coding	KNOWN	MR1	protein_coding	MR1-002	181003139	1	4674	49.91715	4674	1	0	NA	NA	NA	NA	NA	NA	NA	NA	NA	NA	0	NA	NA	NA	NA	NA	NA	NA	NA	NA	NA	0.429314137	4660	5.64146366133428	-4.07336895658539	4.76911623796258
12329	chr1	+	ENSG00000231684.2	processed_pseudogene,	pseudogene	1.48503	1.43939	12695	182305136	182305469	334	pseudogene	KNOWN	RP11-416K24.2	processed_pseudogene	RP11-416K24.2-001	182305136	1	4696	1.46221	4696	1	0	NA	NA	NA	NA	NA	NA	NA	NA	NA	NA	0	NA	NA	NA	NA	NA	NA	NA	NA	NA	NA	0.467706459	4682	0.548150523466704	-5.01620263522806	3.61687615899523
12336	chr1	-	ENSG00000135821.10	processed_transcript,processed_transcript,	protein_coding	130.205	146.966	12702	182353331	182360894	7564	protein_coding	KNOWN	GLUL	processed_transcript	GLUL-004	182360894	1	4697	277.171	4697	1	4	-246|-285|-382.5|-581	6|4|7|9	0.105263157894737|0.181818181818182|0.0408163265306122|0.107142857142857	0.105263157894737|0.0909090909090909|0.244897959183673|0.232142857142857	0.0526315789473684|0.0454545454545455|0.163265306122449|0.0892857142857143	38|22|49|56	NA|1|NA|NA	NA|4|NA|NA	NA|4|NA|NA	+|+|-|+	1	750	5	0.033333333	0.066666667	0.133333333	30	NA	NA	NA	+	0.450109978	4683	8.11463250805489	-1.26707619223293	7.51049684516814
12407	chr1	+	ENSG00000224468.1	processed_transcript,	processed_transcript	0	0.049634	12773	183107514	183110439	2926	processed_transcript	PUTATIVE	RP11-181K3.4	processed_transcript	RP11-181K3.4-001	183107514	1	4717	0.024817	4717	1	0	NA	NA	NA	NA	NA	NA	NA	NA	NA	NA	0	NA	NA	NA	NA	NA	NA	NA	NA	NA	NA	0.388922216	4703	-5.33252746377914	-5.58720326112291	2.5206505578523
12420	chr1	+	ENSG00000116698.16	nonsense_mediated_decay,	protein_coding	0.0530366	0	12786	183441351	183498149	56799	protein_coding	KNOWN	SMG7	nonsense_mediated_decay	SMG7-005	183441351	1	4722	0.0265183	4722	1	2	-1916.5|-952.5	4|5	0.0434782608695652|0.114285714285714	0.0869565217391304|0.0571428571428571	0.130434782608696|0.171428571428571	23|35	NA|NA	NA|NA	NA|NA	+|+	2	162.5|590	5|5	0.129032258064516|0.147058823529412	0.032258064516129|0.117647058823529	0|0.117647058823529	31|34	NA|NA	NA|NA	NA|NA	-|+	0.431513697	4708	-5.23686789773981	-2.62681619290224	4.54878231068638
12442	chr1	-	ENSG00000162704.10	protein_coding,	protein_coding	102.202	110.932	12808	183595593	183604892	9300	protein_coding	KNOWN	ARPC5	protein_coding	ARPC5-002	183604892	1	4726	106.567	4726	1	0	NA	NA	NA	NA	NA	NA	NA	NA	NA	NA	2	275|30.5	7|4	0.03125|0.0434782608695652	0.125|0.0869565217391304	0.125|0.260869565217391	32|23	NA|4	NA|5	NA|2	+|-	0.393721256	4712	6.73561694581756	-2.15649205149367	6.73324055217207
12484	chr1	-	ENSG00000135842.12	protein_coding,	protein_coding	0	0.049634	12854	184760164	184943682	183519	protein_coding	KNOWN	FAM129A	protein_coding	FAM129A-001	184943682	1	4746	0.024817	4746	1	0	NA	NA	NA	NA	NA	NA	NA	NA	NA	NA	1	447	4	0.1	0.15	0.1	20	3	1	3	-	0.415716857	4732	-5.33252746377914	-4.82823971026457	2.4164095770312
12492	chr1	-	ENSG00000121486.7	protein_coding,	protein_coding	26.7305	22.9806	12863	185087230	185126113	38884	protein_coding	KNOWN	TRMT1L	protein_coding	TRMT1L-001	185126113	1	4750	24.85555	4750	1	0	NA	NA	NA	NA	NA	NA	NA	NA	NA	NA	2	1638.5|439.5	4|4	0.16|0.0952380952380952	0.08|0.19047619047619	0.12|0.0476190476190476	25|21	NA|NA	NA|NA	NA|NA	-|+	0.438712258	4736	4.6354961222674	-1.94008546608271	6.89342540660081
12496	chr1	+	ENSG00000116668.8	protein_coding,	protein_coding	1.32592	0.74451	12867	185126291	185260897	134607	protein_coding	KNOWN	SWT1	protein_coding	SWT1-001	185126291	1	4751	1.035215	4751	1	2	-1816.5|-617.5	4|4	0.16|0.0952380952380952	0.08|0.19047619047619	0.12|0.0476190476190476	25|21	NA|NA	NA|NA	NA|NA	-|+	0	NA	NA	NA	NA	NA	NA	NA	NA	NA	NA	0.397720456	4737	0.0499304268758542	-2.04215373971755	5.07667914607968
12540	chr1	+	ENSG00000157181.9	protein_coding,	protein_coding	10.4482	19.1091	12912	186344970	186390507	45538	protein_coding	KNOWN	C1orf27	protein_coding	C1orf27-001	186344970	1	4771	14.77865	4771	1	1	-95.5	3	0.176470588	0	0	17	NA	NA	NA	+	0	NA	NA	NA	NA	NA	NA	NA	NA	NA	NA	0.401719656	4757	3.88544258309545	-1.56063861856543	7.38427787981536
12612	chr1	+	ENSG00000231767.2	processed_pseudogene,processed_pseudogene,	pseudogene	0.212147	0.347438	12984	192685313	192685778	466	pseudogene	KNOWN	RP11-92K2.2	processed_pseudogene	RP11-92K2.2-001	192685313	1	4822	0.559585	4822	1	0	NA	NA	NA	NA	NA	NA	NA	NA	NA	NA	0	NA	NA	NA	NA	NA	NA	NA	NA	NA	NA	0.394121176	4808	-0.837570804142475	-5.86136369934326	3.00511394114245
12640	chr1	-	ENSG00000116750.7	protein_coding,	protein_coding	0.212147	0.099268	13017	193020922	193029210	8289	protein_coding	KNOWN	UCHL5	protein_coding	UCHL5-010	193029210	1	4834	0.1557075	4834	1	0	NA	NA	NA	NA	NA	NA	NA	NA	NA	NA	0	NA	NA	NA	NA	NA	NA	NA	NA	NA	NA	0.373325335	4820	-2.68308965816333	-3.51455669157575	7.63036185107914
12647	chr1	+	ENSG00000134371.8	protein_coding,	protein_coding	6.57654	7.54437	13024	193091147	193223031	131885	protein_coding	KNOWN	CDC73	protein_coding	CDC73-001	193091147	1	4837	7.060455	4837	1	1	-524.5	4	0	0.08	0.28	25	NA	NA	NA	-	1	420	4	0.214285714	0.071428571	0.178571429	28	2	7	5	+	0.397520496	4823	2.81976115872195	-1.82061119557303	7.11285864052915
12702	chr1	-	ENSG00000066279.11	protein_coding,protein_coding,	protein_coding	10.2891	8.33852	13079	197053258	197115824	62567	protein_coding	KNOWN	ASPM	protein_coding	ASPM-201	197115824	1	4866	18.62762	4866	1	0	NA	NA	NA	NA	NA	NA	NA	NA	NA	NA	0	NA	NA	NA	NA	NA	NA	NA	NA	NA	NA	0.419316137	4852	4.21937145174664	-2.50143461858765	6.47583730233174
12704	chr1	-	ENSG00000177888.6	protein_coding,	protein_coding	0	0.049634	13081	197128455	197169672	41218	protein_coding	KNOWN	ZBTB41	protein_coding	ZBTB41-001	197169672	1	4867	0.024817	4867	1	3	-639.5|-1072.5|-1608	5|4|4	0.222222222222222|0.238095238095238|0.181818181818182	0.0740740740740741|0.0476190476190476|0.0454545454545455	0.111111111111111|0.0476190476190476|0.0454545454545455	27|21|22	NA|1|1	NA|4|6	NA|3|1	-|+|-	0	NA	NA	NA	NA	NA	NA	NA	NA	NA	NA	0.413517297	4853	-5.33252746377914	-5.41728597065857	4.76186010288499
12725	chr1	-	ENSG00000213047.6	protein_coding,	protein_coding	0.106073	0	13104	197521385	197704767	183383	protein_coding	KNOWN	DENND1B	protein_coding	DENND1B-201	197704767	1	4879	0.0530365	4879	1	0	NA	NA	NA	NA	NA	NA	NA	NA	NA	NA	0	NA	NA	NA	NA	NA	NA	NA	NA	NA	NA	0.377324535	4865	-4.23687061793002	-5.4738670315075	2.29819142716119
12733	chr1	-	ENSG00000213047.6	retained_intron,	protein_coding	1.16681	0.74451	13112	197703139	197744556	41418	protein_coding	KNOWN	DENND1B	retained_intron	DENND1B-005	197744556	1	4882	0.95566	4882	1	1	-82	4	0.125	0.125	0	24	NA	NA	NA	+	3	490.5|308|93	4|4|5	0.0952380952380952|0|0.09375	0.238095238095238|0.25|0.09375	0|0.0357142857142857|0.09375	21|28|32	NA|NA|NA	NA|NA|NA	NA|NA|NA	+|-|-	0.382523495	4868	-0.0654306603218127	-2.86879509315593	5.44620351779666
12736	chr1	+	ENSG00000203724.6	protein_coding,	protein_coding	0.47733	0.297804	13115	197871777	197876497	4721	protein_coding	KNOWN	C1orf53	protein_coding	C1orf53-001	197871777	1	4883	0.387567	4883	1	0	NA	NA	NA	NA	NA	NA	NA	NA	NA	NA	1	284.5	4	0.095238095	0.142857143	0	21	NA	NA	NA	-	0.386322735	4869	-1.36748235943664	-2.49898588656179	5.69193632753456
12745	chr1	+	ENSG00000151414.10	protein_coding,	protein_coding	6.25832	6.20425	13126	198126128	198288652	162525	protein_coding	KNOWN	NEK7	protein_coding	NEK7-006	198126128	1	4885	6.231285	4885	1	1	-1607	4	0.227272727	0.045454545	0.090909091	22	NA	NA	NA	-	1	362	6	0.125	0.2	0.05	40	NA	NA	NA	+	0.416516697	4871	2.63952970289051	-1.80641243583912	5.48265494012259
12827	chr1	+	ENSG00000163362.6	protein_coding,	protein_coding	0.212147	0.148902	13214	200860176	200868666	8491	protein_coding	KNOWN	C1orf106	protein_coding	C1orf106-005	200860176	1	4930	0.1805245	4930	1	0	NA	NA	NA	NA	NA	NA	NA	NA	NA	NA	4	12|90|696.5|950	8|5|4|4	0.115384615384615|0.111111111111111|0.12|0.153846153846154	0.192307692307692|0.166666666666667|0.12|0.115384615384615	0.0384615384615385|0.0555555555555556|0.12|0.0384615384615385	52|36|25|26	NA|NA|NA|NA	NA|NA|NA|NA	NA|NA|NA|NA	+|+|+|+	0.5034993	4916	-2.46973344819105	-2.94562659017054	6.16803239289149
12896	chr1	-	ENSG00000174307.5	protein_coding,	protein_coding	24.3438	23.2784	13286	201434620	201438312	3693	protein_coding	KNOWN	PHLDA3	protein_coding	PHLDA3-001	201438312	1	4949	23.8111	4949	1	3	-91.5|-147|-257.5	4|6|4	0.0344827586206897|0.111111111111111|0.185185185185185	0.310344827586207|0.166666666666667|0.037037037037037	0|0.0277777777777778|0.037037037037037	29|36|27	NA|NA|NA	NA|NA|NA	NA|NA|NA	+|+|+	1	142.5	4	0.043478261	0.217391304	0.130434783	23	2	2	6	-	0.520095981	4935	4.57356236513391	-1.46872687660433	6.61753372063811
12940	chr1	+	ENSG00000134375.6	processed_transcript,	protein_coding	43.1188	30.0286	13332	201924634	201938845	14212	protein_coding	KNOWN	TIMM17A	processed_transcript	TIMM17A-003	201924634	1	4968	36.5737	4968	1	1	-337	4	0.272727273	0	0	22	NA	NA	NA	+	2	93|254.5	4|4	0.214285714285714|0.0952380952380952	0.0714285714285714|0.0476190476190476	0.0357142857142857|0.19047619047619	28|21	7|4	4|2	2|3	-|-	0.462507499	4954	5.19273468004716	-1.74709516426161	7.62634865684321
12947	chr1	+	ENSG00000176393.6	protein_coding,	protein_coding	8.75105	7.59401	13339	201951780	201975275	23496	protein_coding	KNOWN	RNPEP	protein_coding	RNPEP-003	201951780	1	4971	8.17253	4971	1	0	NA	NA	NA	NA	NA	NA	NA	NA	NA	NA	1	522	6	0.113636364	0.113636364	0.113636364	44	NA	NA	NA	-	0.454709058	4957	3.03078276789609	-2.07460210351807	6.83360368989735
12968	chr1	+	ENSG00000163435.10	processed_transcript,	protein_coding	0.265183	0.148902	13360	201981573	201982404	832	protein_coding	KNOWN	ELF3	processed_transcript	ELF3-008	201981573	1	4978	0.2070425	4978	1	1	-1137	5	0.117647059	0.117647059	0.176470588	34	NA	NA	NA	+	1	359.5	5	0.297297297	0.162162162	0.054054054	37	NA	NA	NA	-	0.553889222	4964	-2.27200115206261	-5.27642917324767	3.08031792980058
12978	chr1	-	ENSG00000143862.3	protein_coding,	protein_coding	28.8519	24.6681	13370	202102532	202113869	11338	protein_coding	KNOWN	ARL8A	protein_coding	ARL8A-001	202113869	1	4983	26.76	4983	1	0	NA	NA	NA	NA	NA	NA	NA	NA	NA	NA	5	1253|700.5|409|319.5|86	4|4|4|7|5	0.115384615384615|0.173913043478261|0.0384615384615385|0|0.0833333333333333	0.153846153846154|0.130434782608696|0.307692307692308|0.325581395348837|0.333333333333333	0.153846153846154|0.0869565217391304|0|0.0697674418604651|0.0555555555555556	26|23|26|43|36	NA|4|7|NA|NA	NA|4|4|NA|NA	NA|2|1|NA|NA	-|-|-|-|-	0.517496501	4969	4.74200621086674	-2.65289229577593	4.55404897188073
13004	chr1	-	ENSG00000077152.5	retained_intron,protein_coding,	protein_coding	113.604	79.2655	13396	202300785	202311108	10324	protein_coding	KNOWN	UBE2T	protein_coding	UBE2T-001	202311108	1	4991	192.8695	4991	1	0	NA	NA	NA	NA	NA	NA	NA	NA	NA	NA	0	NA	NA	NA	NA	NA	NA	NA	NA	NA	NA	0.395320936	4977	7.59148120626815	-2.47552700523591	6.81812976859025
13008	chr1	+	ENSG00000077157.15	protein_coding,nonsense_mediated_decay,	protein_coding	2.97005	2.28317	13400	202317856	202407370	89515	protein_coding	KNOWN	PPP1R12B	protein_coding	PPP1R12B-005	202317856	1	4992	5.25322	4992	1	0	NA	NA	NA	NA	NA	NA	NA	NA	NA	NA	0	NA	NA	NA	NA	NA	NA	NA	NA	NA	NA	0.399320136	4978	2.39320200449317	-2.81602694847433	7.88648193310695
13032	chr1	-	ENSG00000117139.10	protein_coding,	protein_coding	0.265183	0.198536	13424	202699033	202719822	20790	protein_coding	KNOWN	KDM5B	protein_coding	KDM5B-202	202719822	1	5005	0.2318595	5005	1	0	NA	NA	NA	NA	NA	NA	NA	NA	NA	NA	0	NA	NA	NA	NA	NA	NA	NA	NA	NA	NA	0.399920016	4991	-2.10867725529114	-5.4738670315075	2.26897822018365
13039	chr1	-	ENSG00000117139.10	protein_coding,	protein_coding	21.3207	20.0521	13431	202696571	202777546	80976	protein_coding	KNOWN	KDM5B	protein_coding	KDM5B-003	202777546	1	5008	20.6864	5008	1	2	-115|-1329.5	5|4	0.0384615384615385|0.111111111111111	0.0384615384615385|0.0740740740740741	0.192307692307692|0.037037037037037	26|27	NA|NA	NA|NA	NA|NA	-|+	8	1632|1533|1099.5|1072|766.5|564.5|370|157	4|4|4|4|4|6|5|6	0.272727272727273|0.125|0.0869565217391304|0.0625|0|0.027027027027027|0.09375|0.0476190476190476	0|0.166666666666667|0.217391304347826|0.1875|0|0.297297297297297|0.1875|0.380952380952381	0.0454545454545455|0.125|0.0434782608695652|0.03125|0.142857142857143|0.0540540540540541|0.03125|0.0238095238095238	22|24|23|32|21|37|32|42	NA|2|5|NA|NA|NA|NA|NA	NA|6|1|NA|NA|NA|NA|NA	NA|4|4|NA|NA|NA|NA|NA	+|-|+|-|-|-|-|+	0.519496101	4994	4.37061069349059	-3.59072749588623	5.98692077812847
13042	chr1	+	ENSG00000228288.1	processed_transcript,processed_transcript,	processed_transcript	2.5988	2.53134	13434	202780090	202781041	952	processed_transcript	NOVEL	RP11-480I12.3	processed_transcript	RP11-480I12.3-001	202780090	1	5009	5.13014	5009	1	1	-1214.5	4	0.111111111	0.074074074	0.037037037	27	NA	NA	NA	+	4	514.5|693|1267|1462	5|4|4|4	0.142857142857143|0.166666666666667|0.208333333333333|0.0833333333333333	0.171428571428571|0|0.0416666666666667|0.166666666666667	0.114285714285714|0.111111111111111|0.0833333333333333|0.208333333333333	35|18|24|24	NA|NA|NA|5	NA|NA|NA|3	NA|NA|NA|4	+|-|-|+	0.542691462	4995	2.35899819708959	-1.59858365966499	5.8170196605085
13050	chr1	-	ENSG00000183155.4	protein_coding,	protein_coding	10.183	11.8129	13442	202848085	202858263	10179	protein_coding	KNOWN	RABIF	protein_coding	RABIF-001	202858263	1	5015	10.99795	5015	1	0	NA	NA	NA	NA	NA	NA	NA	NA	NA	NA	1	407	7	0.108695652	0.217391304	0.065217391	46	NA	NA	NA	+	0.422715457	5001	3.45916272768679	-0.995387874590645	6.2015948442778
13072	chr1	+	ENSG00000163444.7	retained_intron,	protein_coding	11.509	10.0261	13465	202976531	202985222	8692	protein_coding	KNOWN	TMEM183A	retained_intron	TMEM183A-005	202976531	1	5024	10.76755	5024	1	0	NA	NA	NA	NA	NA	NA	NA	NA	NA	NA	0	NA	NA	NA	NA	NA	NA	NA	NA	NA	NA	0.435112977	5010	3.42861811775523	-1.79936512264368	6.99753640228617
13111	chr1	+	ENSG00000159388.5	protein_coding,	protein_coding	3.34131	2.53134	13505	203274664	203278730	4067	protein_coding	KNOWN	BTG2	protein_coding	BTG2-001	203274664	1	5038	2.936325	5038	1	3	-1571.5|-1167.5|-171.5	4|4|5	0.130434782608696|0.241379310344828|0	0.0434782608695652|0.172413793103448|0.137931034482759	0.173913043478261|0.0344827586206897|0.0689655172413793	23|29|29	NA|NA|NA	NA|NA|NA	NA|NA|NA	+|+|+	1	1492	4	0.136363636	0.090909091	0.090909091	22	NA	NA	NA	-	0.4955009	5024	1.55401165821489	-1.44771733983276	6.37131504981881
13132	chr1	+	ENSG00000058673.10	processed_transcript,protein_coding,protein_coding,	protein_coding	5.62188	8.73559	13529	203764782	203787793	23012	protein_coding	KNOWN	ZC3H11A	protein_coding	ZC3H11A-007	203764782	1	5049	21.536205	5049	1	0	NA	NA	NA	NA	NA	NA	NA	NA	NA	NA	3	187.5|298.5|380	6|3|6	0.0975609756097561|0.105263157894737|0.105263157894737	0.0975609756097561|0|0.0263157894736842	0.0975609756097561|0.0526315789473684|0.131578947368421	41|19|38	NA|NA|NA	NA|NA|NA	NA|NA|NA	+|-|-	0.448110378	5035	4.42869214281765	-2.47152070770514	6.36105962255877
13146	chr1	+	ENSG00000182004.8	processed_transcript,processed_transcript,	protein_coding	23.23	15.0391	13543	203830731	203839212	8482	protein_coding	KNOWN	SNRPE	processed_transcript	SNRPE-005	203830731	1	5054	38.2691	5054	1	0	NA	NA	NA	NA	NA	NA	NA	NA	NA	NA	0	NA	NA	NA	NA	NA	NA	NA	NA	NA	NA	0.461107778	5040	5.2581080674693	-1.82725134524774	7.06083002515379
13152	chr1	-	ENSG00000232917.4	processed_pseudogene,	pseudogene	0.106073	0.148902	13549	203872851	203873141	291	pseudogene	KNOWN	RP11-450D21.1	processed_pseudogene	RP11-450D21.1-001	203873141	1	5056	0.1274875	5056	1	0	NA	NA	NA	NA	NA	NA	NA	NA	NA	NA	0	NA	NA	NA	NA	NA	NA	NA	NA	NA	NA	0.415316937	5042	-2.97157229542733	-5.31611131436819	2.98192716537735
13195	chr1	-	ENSG00000158615.7	protein_coding,	protein_coding	7.63728	9.9268	13594	204375080	204380945	5866	protein_coding	KNOWN	PPP1R15B	protein_coding	PPP1R15B-201	204380945	1	5076	8.78204	5076	1	1	-246	2	0	0.03125	0	32	NA	NA	NA	+	0	NA	NA	NA	NA	NA	NA	NA	NA	NA	NA	0.462907419	5062	3.1345561055952	-1.54413594289504	7.94691568445454
13205	chr1	-	ENSG00000133056.8	protein_coding,	protein_coding	0.424293	0.446706	13604	204438538	204463852	25315	protein_coding	KNOWN	PIK3C2B	protein_coding	PIK3C2B-003	204463852	1	5077	0.4354995	5077	1	0	NA	NA	NA	NA	NA	NA	NA	NA	NA	NA	1	1075.5	4	0.137931034	0.103448276	0.103448276	29	NA	NA	NA	-	0.471305739	5063	-1.19925703243047	-2.29618340788166	6.29945729392158
13260	chr1	-	ENSG00000117222.9	protein_coding,protein_coding,	protein_coding	10.7134	10.7209	13663	205055270	205091143	35874	protein_coding	KNOWN	RBBP5	protein_coding	RBBP5-001	205091143	1	5099	21.4343	5099	1	0	NA	NA	NA	NA	NA	NA	NA	NA	NA	NA	0	NA	NA	NA	NA	NA	NA	NA	NA	NA	NA	0.429314137	5085	4.4218493973691	-2.61616241786724	7.34936180546369
13264	chr1	-	ENSG00000133059.11	protein_coding,protein_coding,	protein_coding	0.265183	0.446706	13667	205111633	205180694	69062	protein_coding	KNOWN	DSTYK	protein_coding	DSTYK-002	205180694	1	5102	0.711889	5102	1	1	-27	4	0.115384615	0.115384615	0	26	NA	NA	NA	-	1	508.5	6	0.183673469	0.224489796	0.020408163	49	NA	NA	NA	-	0.411717656	5088	-0.490275785765342	-1.59465677655297	6.36583261522987
13288	chr1	-	ENSG00000186007.5	protein_coding,	protein_coding	1.5911	1.58829	13691	205350506	205419059	68554	protein_coding	KNOWN	LEMD1	protein_coding	LEMD1-203	205419059	1	5113	1.589695	5113	1	5	-84|-189.5|-400|-669|-849.5	4|6|4|4|4	0.111111111111111|0.0285714285714286|0.1875|0.0909090909090909|0.130434782608696	0.111111111111111|0.114285714285714|0|0|0.173913043478261	0|0.0857142857142857|0|0.136363636363636|0.0869565217391304	18|35|16|22|23	NA|NA|1|3|5	NA|NA|1|1|3	NA|NA|1|4|2	-|+|-|-|+	5	1444.5|1064.5|456|166.5|89	4|4|4|4|5	0|0.275862068965517|0.115384615384615|0|0.0882352941176471	0.0952380952380952|0.0689655172413793|0.0769230769230769|0.16|0.205882352941176	0.19047619047619|0.103448275862069|0.192307692307692|0.24|0.117647058823529	21|29|26|25|34	NA|7|NA|NA|NA	NA|3|NA|NA|NA	NA|7|NA|NA|NA	-|+|-|-|+	0.542691462	5099	0.668749995574891	-1.34849686865838	6.23683712908808
13345	chr1	-	ENSG00000117280.8	protein_coding,	protein_coding	4.13686	4.6656	13748	205739428	205744587	5160	protein_coding	KNOWN	RAB7L1	protein_coding	RAB7L1-003	205744587	1	5128	4.40123	5128	1	0	NA	NA	NA	NA	NA	NA	NA	NA	NA	NA	1	650	4	0.090909091	0	0.045454545	22	NA	NA	NA	-	0.422715457	5114	2.13790676623123	-2.49004271140722	4.99372904028285
13398	chr1	+	ENSG00000143466.7	processed_transcript,	protein_coding	4.08382	3.37511	13803	206643819	206670220	26402	protein_coding	KNOWN	IKBKE	processed_transcript	IKBKE-002	206643819	1	5151	3.729465	5151	1	0	NA	NA	NA	NA	NA	NA	NA	NA	NA	NA	1	816	5	0.153846154	0	0.076923077	26	NA	NA	NA	+	0.50309938	5137	1.89896868752999	-2.76610210990443	4.47189030608973
13419	chr1	+	ENSG00000143479.11	protein_coding,	protein_coding	0.265183	0.297804	13824	206808881	206822538	13658	protein_coding	KNOWN	DYRK3	protein_coding	DYRK3-001	206808881	1	5159	0.2814935	5159	1	0	NA	NA	NA	NA	NA	NA	NA	NA	NA	NA	0	NA	NA	NA	NA	NA	NA	NA	NA	NA	NA	0.454309138	5145	-1.82882648564059	-1.47593234086501	4.59294782145342
13466	chr1	-	ENSG00000182795.12	protein_coding,	protein_coding	0.47733	0.545974	13871	207191866	207206092	14227	protein_coding	KNOWN	C1orf116	protein_coding	C1orf116-001	207206092	1	5178	0.511652	5178	1	1	-72	4	0.222222222	0	0.055555556	18	1	3	1	+	0	NA	NA	NA	NA	NA	NA	NA	NA	NA	NA	0.406318736	5164	-0.966765199843361	-3.08557632592984	3.93670462841252
13502	chr1	+	ENSG00000196352.8	retained_intron,protein_coding,	protein_coding	39.3002	39.7072	13907	207495032	207511004	15973	protein_coding	KNOWN	CD55	retained_intron	CD55-005	207495032	1	5190	79.0074	5190	1	3	-1161|-329.5|-60	4|4|4	0.1|0.222222222222222|0	0|0.037037037037037|0.15	0.15|0.0740740740740741|0.15	20|27|20	NA|NA|NA	NA|NA|NA	NA|NA|NA	+|-|-	0	NA	NA	NA	NA	NA	NA	NA	NA	NA	NA	0.437312537	5176	6.30391588037104	-1.70839174803203	6.75010810797079
13613	chr1	-	ENSG00000162757.3	protein_coding,	protein_coding	0.63644	1.04231	14021	209955661	209957904	2244	protein_coding	KNOWN	C1orf74	protein_coding	C1orf74-001	209957904	1	5236	0.839375	5236	1	0	NA	NA	NA	NA	NA	NA	NA	NA	NA	NA	0	NA	NA	NA	NA	NA	NA	NA	NA	NA	NA	0.448910218	5222	-0.252612600347282	-1.70321488665819	5.43781391730195
13619	chr1	+	ENSG00000117597.11	protein_coding,	protein_coding	13.6304	14.3442	14027	210001352	210025558	24207	protein_coding	KNOWN	DIEXF	protein_coding	DIEXF-001	210001352	1	5239	13.9873	5239	1	2	-1878.5|-1629.5	6|4	0.195121951219512|0.173913043478261	0.0731707317073171|0.0434782608695652	0.170731707317073|0.0869565217391304	41|23	NA|NA	NA|NA	NA|NA	+|-	0	NA	NA	NA	NA	NA	NA	NA	NA	NA	NA	0.403319336	5225	3.80604559759423	-2.63934574948823	5.30984588075286
13642	chr1	-	ENSG00000200972.1	snRNA,	snRNA	0.0530366	0.099268	14051	210547498	210547611	114	snRNA	NOVEL	U5.7	snRNA	U5.7-201	210547611	1	5247	0.0761523	5247	1	0	NA	NA	NA	NA	NA	NA	NA	NA	NA	NA	1	960.5	4	0.225806452	0	0.096774194	31	NA	NA	NA	+	0.391121776	5233	-3.71496857921469	-4.42970027353625	4.63937157026632
13651	chr1	+	ENSG00000226986.2	retrotransposed,	pseudogene	0.0530366	0	14060	211380389	211381286	898	pseudogene	KNOWN	RP11-543B16.2	retrotransposed	RP11-543B16.2-201	211380389	1	5254	0.0265183	5254	1	0	NA	NA	NA	NA	NA	NA	NA	NA	NA	NA	0	NA	NA	NA	NA	NA	NA	NA	NA	NA	NA	0.411117776	5240	-5.23686789773981	-5.74074072596993	3.62222851103769
13671	chr1	+	ENSG00000082512.10	protein_coding,	protein_coding	0.15911	0.198536	14081	211500169	211546246	46078	protein_coding	KNOWN	TRAF5	protein_coding	TRAF5-203	211500169	1	5257	0.178823	5257	1	1	-58.5	8	0.042553191	0.234042553	0	47	NA	NA	NA	-	2	241.5|496.5	5|4	0.0571428571428571|0.0967741935483871	0.228571428571429|0.193548387096774	0.0571428571428571|0.129032258064516	35|31	NA|NA	NA|NA	NA|NA	+|-	0.453709258	5243	-2.48339578872444	-2.88682224474149	3.682214608831
13678	chr1	+	ENSG00000236809.2	unprocessed_pseudogene,	pseudogene	0.0530366	0	14088	211590367	211591276	910	pseudogene	KNOWN	RP11-318L16.4	unprocessed_pseudogene	RP11-318L16.4-001	211590367	1	5259	0.0265183	5259	1	0	NA	NA	NA	NA	NA	NA	NA	NA	NA	NA	0	NA	NA	NA	NA	NA	NA	NA	NA	NA	NA	0.431913617	5245	-5.23686789773981	-3.3407914355755	4.16748704874667
13683	chr1	-	ENSG00000170385.8	protein_coding,protein_coding,	protein_coding	0.0530366	0.049634	14093	211744910	211752065	7156	protein_coding	KNOWN	SLC30A1	protein_coding	SLC30A1-002	211752065	1	5264	0.1026706	5264	1	2	-645|-784.5	4|5	0.1|0.0606060606060606	0.1|0.242424242424242	0|0.0909090909090909	20|33	NA|NA	NA|NA	NA|NA	+|+	0	NA	NA	NA	NA	NA	NA	NA	NA	NA	NA	0.48770246	5250	-3.28390497366436	-4.00923965254153	6.05245085042108
13715	chr1	-	ENSG00000143493.8	protein_coding,processed_transcript,	protein_coding	4.45508	4.71523	14125	212114690	212208878	94189	protein_coding	KNOWN	INTS7	protein_coding	INTS7-003	212208878	1	5282	9.17031	5282	1	0	NA	NA	NA	NA	NA	NA	NA	NA	NA	NA	0	NA	NA	NA	NA	NA	NA	NA	NA	NA	NA	0.378324335	5268	3.19697050458404	-1.05079830441118	6.42683514034576
13719	chr1	+	ENSG00000143476.12	protein_coding,	protein_coding	12.8349	7.99108	14129	212209092	212276604	67513	protein_coding	KNOWN	DTL	protein_coding	DTL-202	212209092	1	5283	10.41299	5283	1	0	NA	NA	NA	NA	NA	NA	NA	NA	NA	NA	0	NA	NA	NA	NA	NA	NA	NA	NA	NA	NA	0.435312937	5269	3.38031248041212	-1.70933500533458	6.63814928302371
13732	chr1	+	ENSG00000066027.4	protein_coding,	protein_coding	32.0341	32.6592	14142	212458782	212534112	75331	protein_coding	KNOWN	PPP2R5A	protein_coding	PPP2R5A-202	212458782	1	5290	32.34665	5290	1	0	NA	NA	NA	NA	NA	NA	NA	NA	NA	NA	3	51.5|415|551	4|4|5	0.04|0.125|0.0588235294117647	0.12|0.0833333333333333|0.235294117647059	0.12|0|0.0294117647058824	25|24|34	NA|NA|NA	NA|NA|NA	NA|NA|NA	+|-|+	0.445310938	5276	5.01554440127374	-2.00403939846582	6.54070317258722
13786	chr1	+	ENSG00000162769.7	protein_coding,	protein_coding	12.994	11.0188	14199	213031597	213072705	41109	protein_coding	KNOWN	FLVCR1	protein_coding	FLVCR1-001	213031597	1	5318	12.0064	5318	1	0	NA	NA	NA	NA	NA	NA	NA	NA	NA	NA	0	NA	NA	NA	NA	NA	NA	NA	NA	NA	NA	0.468506299	5304	3.58573173296593	-1.02590829178628	6.4371546247981
13826	chr1	+	ENSG00000117707.8	protein_coding,	protein_coding	32.2463	33.5526	14240	214161286	214209282	47997	protein_coding	KNOWN	PROX1	protein_coding	PROX1-002	214161286	1	5328	32.89945	5328	1	2	-227.5|-155	5|4	0|0.0454545454545455	0.0740740740740741|0.0454545454545455	0.111111111111111|0.136363636363636	27|22	NA|NA	NA|NA	NA|NA	+|-	2	334.5|1655	4|4	0.2|0.222222222222222	0.04|0.0555555555555556	0.04|0	25|18	5|1	3|4	3|1	-|+	0.519896021	5314	5.03999156064408	-3.0794658309149	6.30514626829748
13828	chr1	+	ENSG00000223365.1	processed_transcript,	processed_transcript	0	0.049634	14242	214167446	214168426	981	processed_transcript	NOVEL	RP11-478J18.3	processed_transcript	RP11-478J18.3-001	214167446	1	5329	0.024817	5329	1	0	NA	NA	NA	NA	NA	NA	NA	NA	NA	NA	0	NA	NA	NA	NA	NA	NA	NA	NA	NA	NA	0.395520896	5315	-5.33252746377914	-4.43281281821017	2.73587048057308
13833	chr1	+	ENSG00000143499.9	protein_coding,protein_coding,	protein_coding	34.8451	37.6722	14247	214454576	214510474	55899	protein_coding	KNOWN	SMYD2	protein_coding	SMYD2-001	214454576	1	5331	72.5173	5331	1	0	NA	NA	NA	NA	NA	NA	NA	NA	NA	NA	1	319	5	0.038461538	0.076923077	0.038461538	26	NA	NA	NA	+	0.481703659	5317	6.18025330583368	-2.23853771515659	4.91128931658186
13863	chr1	+	ENSG00000136636.6	protein_coding,protein_coding,protein_coding,	protein_coding	3.50042	2.38243	14278	215740735	215795073	54339	protein_coding	KNOWN	KCTD3	protein_coding	KCTD3-001	215740735	1	5346	8.824275	5346	1	1	-232	4	0.153846154	0.115384615	0.115384615	26	NA	NA	NA	+	1	1103	2	0	0.05	0	20	NA	NA	NA	-	0.373925215	5332	3.14147775182618	-2.6285995243909	5.79250161491381
13900	chr1	-	ENSG00000092978.5	protein_coding,protein_coding,	protein_coding	3.50042	3.42475	14317	217781526	217804424	22899	protein_coding	KNOWN	GPATCH2	protein_coding	GPATCH2-002	217804424	1	5356	6.92517	5356	1	0	NA	NA	NA	NA	NA	NA	NA	NA	NA	NA	1	196	4	0.208333333	0.041666667	0.041666667	24	NA	NA	NA	-	0.424315137	5342	2.79184948706747	-2.51538958501155	6.98503138522548
13911	chr1	+	ENSG00000067533.5	protein_coding,	protein_coding	52.7715	49.8326	14328	218458629	218511325	52697	protein_coding	KNOWN	RRP15	protein_coding	RRP15-001	218458629	1	5366	51.30205	5366	1	1	-243.5	5	0.096774194	0.193548387	0.096774194	31	NA	NA	NA	+	0	NA	NA	NA	NA	NA	NA	NA	NA	NA	NA	0.444911018	5352	5.68094457112403	-2.82009664505351	6.77737244425972
13948	chr1	-	ENSG00000196660.6	protein_coding,nonsense_mediated_decay,	protein_coding	2.81094	4.21889	14366	220086848	220101993	15146	protein_coding	KNOWN	SLC30A10	nonsense_mediated_decay	SLC30A10-001	220101993	1	5388	7.02983	5388	1	1	-35	4	0.227272727	0.136363636	0	22	NA	NA	NA	-	0	NA	NA	NA	NA	NA	NA	NA	NA	NA	NA	0.445910818	5374	2.81348980151368	-2.88149670439302	5.43020523415537
13955	chr1	-	ENSG00000136628.11	processed_transcript,	protein_coding	26.3062	40.4517	14373	220205728	220219798	14071	protein_coding	KNOWN	EPRS	processed_transcript	EPRS-002	220219798	1	5392	33.37895	5392	1	0	NA	NA	NA	NA	NA	NA	NA	NA	NA	NA	0	NA	NA	NA	NA	NA	NA	NA	NA	NA	NA	0.48770246	5378	5.06086666751422	-1.4104244433295	6.68099951354859
13983	chr1	+	ENSG00000218283.2	processed_pseudogene,	pseudogene	0.15911	0.24817	14401	220426912	220427878	967	pseudogene	KNOWN	MORF4L1P1	processed_pseudogene	MORF4L1P1-001	220426912	1	5403	0.20364	5403	1	0	NA	NA	NA	NA	NA	NA	NA	NA	NA	NA	0	NA	NA	NA	NA	NA	NA	NA	NA	NA	NA	0.439112178	5389	-2.29590712417299	-3.16875835117127	2.52927325412586
13984	chr1	-	ENSG00000213033.3	processed_pseudogene,	pseudogene	0.371256	0.148902	14402	220440053	220441259	1207	pseudogene	KNOWN	AURKAPS1	processed_pseudogene	AURKAPS1-001	220441259	1	5404	0.260079	5404	1	0	NA	NA	NA	NA	NA	NA	NA	NA	NA	NA	0	NA	NA	NA	NA	NA	NA	NA	NA	NA	NA	0.436512697	5390	-1.94297818087739	-5.89530903309981	2.50599456523156
14009	chr1	+	ENSG00000117791.11	protein_coding,	protein_coding	0.0530366	0.397072	14427	220921611	220957582	35972	protein_coding	KNOWN	MOSC2	protein_coding	MOSC2-002	220921611	1	5420	0.2250543	5420	1	0	NA	NA	NA	NA	NA	NA	NA	NA	NA	NA	1	312.5	4	0.052631579	0.263157895	0.052631579	19	3	2	2	-	0.470505899	5406	-2.15165496504765	-2.55384124262128	5.86227302038014
14056	chr1	-	ENSG00000143498.12	protein_coding,	protein_coding	2.06843	2.03499	14478	222731244	222763127	31884	protein_coding	KNOWN	TAF1A	protein_coding	TAF1A-002	222763127	1	5447	2.05171	5447	1	0	NA	NA	NA	NA	NA	NA	NA	NA	NA	NA	0	NA	NA	NA	NA	NA	NA	NA	NA	NA	NA	0.395720856	5433	1.03682682688617	-2.03031862818406	6.496858689939
14058	chr1	+	ENSG00000225265.1	processed_transcript,	processed_transcript	0.0530366	0	14480	222763167	222765828	2662	processed_transcript	PUTATIVE	RP11-378J18.3	processed_transcript	RP11-378J18.3-003	222763167	1	5448	0.0265183	5448	1	0	NA	NA	NA	NA	NA	NA	NA	NA	NA	NA	0	NA	NA	NA	NA	NA	NA	NA	NA	NA	NA	0.369126175	5434	-5.23686789773981	-2.27298746563987	5.91089590419853
14061	chr1	-	ENSG00000143498.12	protein_coding,protein_coding,protein_coding,	protein_coding	1.06073	1.34012	14483	222731650	222763255	31606	protein_coding	KNOWN	TAF1A	protein_coding	TAF1A-001	222763255	1	5449	3.601275	5449	1	0	NA	NA	NA	NA	NA	NA	NA	NA	NA	NA	0	NA	NA	NA	NA	NA	NA	NA	NA	NA	NA	0.389522096	5435	1.84850777058843	-2.46274566524997	6.35256093504414
14063	chr1	-	ENSG00000143498.12	protein_coding,	protein_coding	0.63644	0.99268	14485	222742635	222763275	20641	protein_coding	KNOWN	TAF1A	protein_coding	TAF1A-204	222763275	1	5451	0.81456	5451	1	0	NA	NA	NA	NA	NA	NA	NA	NA	NA	NA	0	NA	NA	NA	NA	NA	NA	NA	NA	NA	NA	0.387322535	5437	-0.295907124172992	-2.63038505407105	6.36647621950076
14070	chr1	-	ENSG00000229399.1	processed_pseudogene,	pseudogene	0.106073	0.049634	14492	222814756	222815200	445	pseudogene	KNOWN	RP11-378J18.6	processed_pseudogene	RP11-378J18.6-001	222815200	1	5454	0.0778535	5454	1	1	-274	4	0.291666667	0.041666667	0.041666667	24	2	1	7	+	0	NA	NA	NA	NA	NA	NA	NA	NA	NA	NA	0.407518496	5440	-3.68309429087966	-5.46110030067954	2.66977647641533
14071	chr1	+	ENSG00000154305.11	protein_coding,	protein_coding	7.42513	7.74291	14493	222817645	222839165	21521	protein_coding	KNOWN	MIA3	protein_coding	MIA3-005	222817645	1	5455	7.58402	5455	1	0	NA	NA	NA	NA	NA	NA	NA	NA	NA	NA	0	NA	NA	NA	NA	NA	NA	NA	NA	NA	NA	0.373725255	5441	2.92296276880669	-1.45086909715848	7.14386690832161
14072	chr1	+	ENSG00000244697.1	processed_transcript,	processed_transcript	7.79639	8.23925	14494	222817657	222856105	38449	processed_transcript	PUTATIVE	RP11-378J18.5	processed_transcript	RP11-378J18.5-001	222817657	1	5456	8.01782	5456	1	0	NA	NA	NA	NA	NA	NA	NA	NA	NA	NA	0	NA	NA	NA	NA	NA	NA	NA	NA	NA	NA	0.373525295	5442	3.00321002935919	-1.48640412048986	7.16102913560462
14073	chr1	+	ENSG00000154305.11	processed_transcript,	protein_coding	5.14455	6.60133	14495	222817736	222825625	7890	protein_coding	KNOWN	MIA3	processed_transcript	MIA3-007	222817736	1	5457	5.87294	5457	1	0	NA	NA	NA	NA	NA	NA	NA	NA	NA	NA	0	NA	NA	NA	NA	NA	NA	NA	NA	NA	NA	0.377324535	5443	2.55408289883574	-1.94452109102248	7.08532701369518
14087	chr1	-	ENSG00000186063.8	protein_coding,	protein_coding	0.106073	0.049634	14510	222842919	222886526	43608	protein_coding	KNOWN	AIDA	protein_coding	AIDA-201	222886526	1	5460	0.0778535	5460	1	1	-257.5	4	0.037037037	0.185185185	0.148148148	27	NA	NA	NA	+	2	845|659	6|5	0.1|0	0.0666666666666667|0.235294117647059	0.0666666666666667|0.0882352941176471	30|34	NA|NA	NA|NA	NA|NA	-|-	0.409118176	5446	-3.68309429087966	-1.89431658253474	6.86923485587582
14090	chr1	+	ENSG00000162819.7	protein_coding,processed_transcript,	protein_coding	9.49356	12.0114	14513	222886718	222898879	12162	protein_coding	KNOWN	BROX	processed_transcript	BROX-003	222886718	1	5461	21.50496	5461	1	2	-1037|-851	6|5	0.1|0	0.0666666666666667|0.235294117647059	0.0666666666666667|0.0882352941176471	30|34	NA|NA	NA|NA	NA|NA	-|-	1	65.5	4	0.037037037	0.185185185	0.148148148	27	NA	NA	NA	+	0.481303739	5447	4.42659754270769	-1.63710484931183	6.14938958747535
14102	chr1	+	ENSG00000228106.1	processed_transcript,	processed_transcript	2.5988	3.52402	14525	222988402	223010724	22323	processed_transcript	PUTATIVE	RP11-452F19.3	processed_transcript	RP11-452F19.3-006	222988402	1	5463	3.06141	5463	1	1	-80	7	0.083333333	0.222222222	0	36	NA	NA	NA	+	1	108.5	5	0.185185185	0.148148148	0.074074074	27	NA	NA	NA	+	0.425514897	5449	1.61419627105121	-1.56831933321135	6.49795094834017
14104	chr1	+	ENSG00000154309.7	processed_transcript,	protein_coding	2.5988	3.52402	14527	222988406	223168242	179837	protein_coding	KNOWN	DISP1	processed_transcript	DISP1-004	222988406	1	5464	3.06141	5464	1	1	-84	7	0.083333333	0.222222222	0	36	NA	NA	NA	+	1	104.5	5	0.185185185	0.148148148	0.074074074	27	NA	NA	NA	+	0.425914817	5450	1.61419627105121	-1.57604116221398	6.48489230038725
14106	chr1	+	ENSG00000228106.1	processed_transcript,	processed_transcript	3.02309	4.02036	14529	222988420	223010725	22306	processed_transcript	PUTATIVE	RP11-452F19.3	processed_transcript	RP11-452F19.3-004	222988420	1	5465	3.521725	5465	1	1	-98	7	0.083333333	0.222222222	0	36	NA	NA	NA	+	1	90.5	5	0.185185185	0.148148148	0.074074074	27	NA	NA	NA	+	0.427514497	5451	1.81628225822479	-1.61175095239105	6.43823310552388
14151	chr1	+	ENSG00000162909.11	protein_coding,	protein_coding	2.22754	3.17658	14578	223900254	223963545	63292	protein_coding	KNOWN	CAPN2	protein_coding	CAPN2-201	223900254	1	5482	2.70206	5482	1	1	-1735	4	0.038461538	0	0.192307692	26	4	1	4	-	4	245.5|363|695|974	4|6|5|4	0.172413793103448|0.0666666666666667|0.233333333333333|0.178571428571429	0.172413793103448|0.2|0.1|0.0714285714285714	0.0344827586206897|0.0333333333333333|0.1|0.107142857142857	29|30|30|28	NA|NA|NA|NA	NA|NA|NA|NA	NA|NA|NA|NA	-|+|+|-	0.483303339	5468	1.43405971046722	-1.93787279591188	4.88789602084983
14185	chr1	+	ENSG00000143756.7	protein_coding,	protein_coding	20.7373	20.1018	14612	224301813	224345852	44040	protein_coding	KNOWN	FBXO28	protein_coding	FBXO28-003	224301813	1	5493	20.41955	5493	1	0	NA	NA	NA	NA	NA	NA	NA	NA	NA	NA	0	NA	NA	NA	NA	NA	NA	NA	NA	NA	NA	0.395720856	5479	4.35187916776704	-1.63262449846247	6.98079315309854
14214	chr1	-	ENSG00000143748.13	protein_coding,protein_coding,protein_coding,	protein_coding	14.6381	12.8056	14642	224415156	224517841	102686	protein_coding	KNOWN	NVL	protein_coding	NVL-201	224517841	1	5506	41.16555	5506	1	1	-1319	4	0.153846154	0.038461538	0.076923077	26	NA	NA	NA	-	2	1916|275	4|4	0.291666666666667|0.192307692307692	0.0833333333333333|0.0769230769230769	0.0833333333333333|0.0769230769230769	24|26	NA|NA	NA|NA	NA|NA	-|-	0.435512897	5492	5.36336559649966	-2.90399731441672	6.70592826791148
14229	chr1	+	ENSG00000143771.7	protein_coding,	protein_coding	30.7613	33.8008	14657	224544595	224567154	22560	protein_coding	KNOWN	CNIH4	protein_coding	CNIH4-005	224544595	1	5508	32.28105	5508	1	1	-28	4	0.083333333	0.166666667	0.166666667	24	NA	NA	NA	+	2	160|292.5	4|4	0.0833333333333333|0.12	0.25|0.24	0.125|0.08	24|25	1|5	6|6	5|2	+|-	0.468506299	5494	5.01261560055251	-2.13099087433646	5.88167459912143
14238	chr1	-	ENSG00000162923.10	protein_coding,protein_coding,	protein_coding	0.31822	0.446706	14668	224572851	224622001	49151	protein_coding	KNOWN	WDR26	protein_coding	WDR26-201	224622001	1	5509	0.764926	5509	1	4	-171|-276|-334.5|-618	15|3|5|4	0.127450980392157|0.2|0|0.0714285714285714	0.0980392156862745|0|0.276595744680851|0.178571428571429	0.0588235294117647|0|0.0425531914893617|0.107142857142857	102|20|47|28	NA|NA|NA|NA	NA|NA|NA|NA	NA|NA|NA|NA	+|-|+|+	1	688.5	5	0.142857143	0.028571429	0.028571429	35	NA	NA	NA	-	0.466906619	5495	-0.386607908646631	-3.4932802732236	4.74676465832645
14291	chr1	-	ENSG00000154380.10	protein_coding,	protein_coding	18.0855	16.7763	14728	225680538	225840844	160307	protein_coding	KNOWN	ENAH	protein_coding	ENAH-006	225840844	1	5525	17.4309	5525	1	6	-91.5|-237.5|-280|-360.5|-622|-942	7|4|3|4|4|4	0.127272727272727|0.0869565217391304|0.0625|0.148148148148148|0.0833333333333333|0.125	0.109090909090909|0.0869565217391304|0.0625|0.111111111111111|0.208333333333333|0.208333333333333	0.0181818181818182|0.0869565217391304|0|0|0.125|0.0416666666666667	55|23|16|27|24|24	NA|NA|NA|NA|1|NA	NA|NA|NA|NA|5|NA	NA|NA|NA|NA|6|NA	+|-|-|-|-|+	2	540.5|475	4|5	0.173913043478261|0	0.130434782608696|0.25	0|0	23|28	2|NA	3|NA	5|NA	+|-	0.483703259	5511	4.12357515614762	-1.78139987077866	6.67285539880079
14295	chr1	+	ENSG00000143742.8	protein_coding,	protein_coding	7.69031	8.38815	14732	225965531	225978168	12638	protein_coding	KNOWN	SRP9	protein_coding	SRP9-001	225965531	1	5529	8.03923	5529	1	0	NA	NA	NA	NA	NA	NA	NA	NA	NA	NA	0	NA	NA	NA	NA	NA	NA	NA	NA	NA	NA	0.456308738	5515	3.00705732623259	-1.95735009015766	7.71493240078307
14314	chr1	-	ENSG00000243709.1	protein_coding,	protein_coding	0.265183	0.545974	14751	226073982	226076846	2865	protein_coding	KNOWN	LEFTY1	protein_coding	LEFTY1-001	226076846	1	5534	0.4055785	5534	1	2	-65|-1555.5	5|4	0.230769230769231|0.206896551724138	0|0.103448275862069	0.0384615384615385|0.103448275862069	26|29	NA|5	NA|7	NA|4	+|-	4	1464.5|1435|1380|349.5	4|5|5|5	0.105263157894737|0.025|0.0882352941176471|0.222222222222222	0.157894736842105|0.2|0.147058823529412|0.148148148148148	0.0526315789473684|0.075|0.0588235294117647|0	19|40|34|27	NA|NA|NA|NA	NA|NA|NA|NA	NA|NA|NA|NA	+|-|-|+	0.49430114	5520	-1.30194691879243	-4.88252829157515	4.41781255660701
14325	chr1	-	ENSG00000248322.1	processed_transcript,	processed_transcript	0.0530366	0	14763	226124111	226125257	1147	processed_transcript	NOVEL	RP4-559A3.6	processed_transcript	RP4-559A3.6-001	226125257	1	5537	0.0265183	5537	1	0	NA	NA	NA	NA	NA	NA	NA	NA	NA	NA	0	NA	NA	NA	NA	NA	NA	NA	NA	NA	NA	0.567886423	5522	-5.23686789773981	-3.98848140188378	2.39279586765653
14327	chr1	-	ENSG00000143768.7	protein_coding,	protein_coding	0.0530366	0	14765	226124298	226129083	4786	protein_coding	KNOWN	LEFTY2	protein_coding	LEFTY2-201	226129083	1	5538	0.0265183	5538	1	1	-1667.5	4	0.148148148	0.222222222	0.037037037	27	NA	NA	NA	+	4	1730.5|1701.5|512.5|103	4|5|5|8	0.105263157894737|0.0769230769230769|0.185185185185185|0.204545454545455	0.157894736842105|0.205128205128205|0.185185185185185|0.0681818181818182	0.0526315789473684|0.0769230769230769|0|0.0681818181818182	19|39|27|44	NA|NA|NA|NA	NA|NA|NA|NA	NA|NA|NA|NA	+|-|+|+	0.51029794	5523	-5.23686789773981	-4.41731684580874	3.65402395928169
14342	chr1	+	ENSG00000185155.5	protein_coding,	protein_coding	2.97005	2.72987	14780	226411319	226413565	2247	protein_coding	KNOWN	MIXL1	protein_coding	MIXL1-001	226411319	1	5546	2.84996	5546	1	3	-560|-179|-5	3|4|4	0.05|0|0.125	0|0.125|0.166666666666667	0.1|0.0625|0.0416666666666667	20|16|24	NA|1|NA	NA|1|NA	NA|1|NA	-|+|-	1	192	5	0.088235294	0.294117647	0	34	NA	NA	NA	-	0.486102779	5531	1.51094167078383	-2.46593046198091	3.68504398451489
14349	chr1	-	ENSG00000183814.10	protein_coding,	protein_coding	0.0530366	0.24817	14788	226418858	226497434	78577	protein_coding	KNOWN	LIN9	protein_coding	LIN9-001	226497434	1	5548	0.1506033	5548	1	0	NA	NA	NA	NA	NA	NA	NA	NA	NA	NA	2	1047.5|270	6|4	0.0606060606060606|0.05	0.212121212121212|0.25	0.0606060606060606|0	33|20	NA|NA	NA|NA	NA|NA	-|-	0.411717656	5533	-2.73117471238433	-3.94784012192964	4.48282300571369
14395	chr1	+	ENSG00000163050.9	processed_transcript,protein_coding,protein_coding,protein_coding,	protein_coding	19.8357	16.8756	14835	227127995	227175246	47252	protein_coding	KNOWN	ADCK3	protein_coding	ADCK3-002	227127995	1	5564	73.4226	5564	1	0	NA	NA	NA	NA	NA	NA	NA	NA	NA	NA	0	NA	NA	NA	NA	NA	NA	NA	NA	NA	NA	0.469906019	5549	6.19815229813838	-1.58466960882704	6.7162832014815
14461	chr1	+	ENSG00000143761.8	protein_coding,	protein_coding	371.787	324.507	14907	228270423	228286910	16488	protein_coding	KNOWN	ARF1	protein_coding	ARF1-203	228270423	1	5601	348.147	5601	1	4	-992|-661.5|-137|-52	5|7|4|4	0.125|0.0588235294117647|0.0416666666666667|0.115384615384615	0.15625|0.196078431372549|0.208333333333333|0.230769230769231	0.125|0.0980392156862745|0.0416666666666667|0.0384615384615385	32|51|24|26	NA|NA|NA|NA	NA|NA|NA|NA	NA|NA|NA|NA	-|-|-|-	3	60|240.5|330.5	4|4|4	0.0384615384615385|0.0476190476190476|0.0952380952380952	0.192307692307692|0.19047619047619|0.19047619047619	0.0769230769230769|0.0476190476190476|0	26|21|21	NA|2|NA	NA|5|NA	NA|1|NA	+|+|-	0.579084183	5586	8.44355278145698	-1.51911039711326	7.56700697811787
14475	chr1	-	ENSG00000143793.8	processed_transcript,	protein_coding	26.4122	24.9659	14921	228288432	228291021	2590	protein_coding	KNOWN	C1orf35	processed_transcript	C1orf35-004	228291021	1	5602	25.68905	5602	1	1	-1831.5	4	0.111111111	0.148148148	0.185185185	27	7	6	2	+	6	1621.5|1055|862.5|500.5|222|34	4|5|5|11|7|4	0.08|0.1|0.129032258064516|0.0476190476190476|0.025|0.0416666666666667	0.16|0.133333333333333|0.193548387096774|0.19047619047619|0.35|0.166666666666667	0.08|0.0666666666666667|0.129032258064516|0.0793650793650794|0.1|0.208333333333333	25|30|31|63|40|24	NA|NA|NA|NA|NA|4	NA|NA|NA|NA|NA|4	NA|NA|NA|NA|NA|4	-|-|-|-|-|-	0.573685263	5587	4.68308163418679	-1.23480136740893	6.04562662758522
14547	chr1	+	ENSG00000181873.8	protein_coding,	protein_coding	0.848586	0.49634	14993	228353516	228369958	16443	protein_coding	KNOWN	C1orf69	protein_coding	C1orf69-001	228353516	1	5609	0.672463	5609	1	2	-501|-93	4|4	0.115384615384615|0.15	0.230769230769231|0.1	0.115384615384615|0	26|20	7|NA	4|NA	3|NA	+|-	3	370.5|419|458	5|4|7	0.0967741935483871|0.0909090909090909|0.075	0.258064516129032|0.272727272727273|0.175	0.032258064516129|0|0.075	31|22|40	NA|3|NA	NA|1|NA	NA|5|NA	+|+|+	0.576084783	5594	-0.572473204444874	-1.92795735917471	4.57835957365737
14589	chr1	+	ENSG00000168159.7	processed_transcript,	protein_coding	1.85628	2.4817	15037	228676691	228682559	5869	protein_coding	KNOWN	RNF187	processed_transcript	RNF187-003	228676691	1	5625	2.16899	5625	1	3	-1505|-1039.5|-985	6|6|5	0.104166666666667|0.135135135135135|0.210526315789474	0.291666666666667|0.216216216216216|0.184210526315789	0.0208333333333333|0.027027027027027|0.0526315789473684	48|37|38	NA|NA|NA	NA|NA|NA	NA|NA|NA	-|-|-	0	NA	NA	NA	NA	NA	NA	NA	NA	NA	NA	0.555688862	5610	1.11702340156544	-4.90829066295956	3.99924312828241
14635	chr1	-	ENSG00000154429.6	protein_coding,protein_coding,	protein_coding	11.7741	10.0757	15083	229456758	229478264	21507	protein_coding	KNOWN	C1orf96	protein_coding	C1orf96-001	229478264	1	5662	21.8498	5662	1	4	-123.5|-186|-251|-687	5|4|4|4	0.04|0.0714285714285714|0.0769230769230769|0.0909090909090909	0.12|0.178571428571429|0.153846153846154|0.272727272727273	0|0.107142857142857|0.0769230769230769|0.0909090909090909	25|28|26|22	NA|NA|NA|3	NA|NA|NA|4	NA|NA|NA|3	+|+|+|-	2	1001|284	4|6	0.230769230769231|0.05	0.0384615384615385|0.225	0.0384615384615385|0.025	26|40	NA|NA	NA|NA	NA|NA	+|+	0.528494301	5647	4.4495481691062	-1.64069928032143	5.36890826401488
14649	chr1	-	ENSG00000069248.7	protein_coding,protein_coding,	protein_coding	8.22068	5.95608	15097	229577045	229644088	67044	protein_coding	KNOWN	NUP133	protein_coding	NUP133-001	229644088	1	5668	14.17676	5668	1	1	-807.5	5	0.24137931	0	0.068965517	29	NA	NA	NA	+	0	NA	NA	NA	NA	NA	NA	NA	NA	NA	NA	0.469306139	5653	3.82545594720846	-2.25910865767314	7.0600561273387
14688	chr1	+	ENSG00000135775.8	protein_coding,	protein_coding	14.0017	17.6697	15136	230778251	230829371	51121	protein_coding	KNOWN	COG2	protein_coding	COG2-202	230778251	1	5689	15.8357	5689	1	1	-235	4	0.192307692	0.076923077	0.115384615	26	NA	NA	NA	-	0	NA	NA	NA	NA	NA	NA	NA	NA	NA	NA	0.453109378	5674	3.98510873643773	-1.81045492142776	6.70108889352612
14697	chr1	+	ENSG00000256023.1	protein_coding,	protein_coding	0.15911	0.347438	15145	230846391	230846576	186	protein_coding	NOVEL	AL512328.1	protein_coding	AL512328.1-201	230846391	1	5690	0.253274	5690	1	1	-1940.5	4	0.047619048	0.047619048	0.142857143	21	NA	NA	NA	-	1	941.5	4	0.086956522	0.173913043	0.130434783	23	5	3	2	+	0.557088582	5675	-1.98122911099252	-5.24326358089925	4.57862528919755
14698	chr1	-	ENSG00000135744.6	protein_coding,	protein_coding	2854.59	3691.13	15146	230838447	230849867	11421	protein_coding	KNOWN	AGT	protein_coding	AGT-201	230849867	1	5691	3272.86	5691	1	0	NA	NA	NA	NA	NA	NA	NA	NA	NA	NA	1	405	4	0.136363636	0.136363636	0.045454545	22	5	2	2	-	0.440511898	5676	11.6763361755796	-2.97708826539449	7.44599158304792
14715	chr1	-	ENSG00000119280.12	retained_intron,	protein_coding	0.106073	0.049634	15163	231004189	231005316	1128	protein_coding	KNOWN	C1orf198	retained_intron	C1orf198-005	231005316	1	5698	0.0778535	5698	1	0	NA	NA	NA	NA	NA	NA	NA	NA	NA	NA	5	1433|1038|990|897|838.5	6|6|7|7|5	0.105263157894737|0.0526315789473684|0.0238095238095238|0.0833333333333333|0.0612244897959184	0.236842105263158|0.263157894736842|0.214285714285714|0.208333333333333|0.183673469387755	0.0263157894736842|0|0.0476190476190476|0.0833333333333333|0.0816326530612245	38|38|42|48|49	NA|NA|NA|NA|NA	NA|NA|NA|NA|NA	NA|NA|NA|NA|NA	+|-|-|-|-	0.430913817	5683	-3.68309429087966	-5.60816186416941	6.34462270827618
14763	chr1	+	ENSG00000010072.10	processed_transcript,	protein_coding	2.70487	2.53134	15216	231474041	231475807	1767	protein_coding	KNOWN	C1orf124	processed_transcript	C1orf124-005	231474041	1	5716	2.618105	5716	1	1	-921.5	4	0.103448276	0.068965517	0.068965517	29	NA	NA	NA	-	0	NA	NA	NA	NA	NA	NA	NA	NA	NA	NA	0.456908618	5701	1.38852295822342	-1.95903182280502	6.89126372705297
14843	chr1	+	ENSG00000183780.8	protein_coding,	protein_coding	0	0.049634	15303	234350017	234460257	110241	protein_coding	KNOWN	SLC35F3	protein_coding	SLC35F3-002	234350017	1	5753	0.024817	5753	1	1	-126	6	0.1	0.175	0.1	40	NA	NA	NA	+	1	87.5	4	0.161290323	0.193548387	0.032258065	31	NA	NA	NA	+	0.456308738	5738	-5.33252746377914	-3.45638927410734	2.82968885160951
14863	chr1	-	ENSG00000059588.5	protein_coding,	protein_coding	1.43199	1.93573	15323	234527059	234614849	87791	protein_coding	KNOWN	TARBP1	protein_coding	TARBP1-001	234614849	1	5763	1.68386	5763	1	0	NA	NA	NA	NA	NA	NA	NA	NA	NA	NA	1	525	4	0.05	0.15	0	20	NA	NA	NA	-	0.434513097	5748	0.751772194400793	-1.50471004970181	4.34013551465035
14868	chr1	+	ENSG00000228830.1	processed_transcript,	processed_transcript	0.0530366	0	15328	234742754	234745229	2476	processed_transcript	PUTATIVE	RP4-781K5.2	processed_transcript	RP4-781K5.2-001	234742754	1	5767	0.0265183	5767	1	0	NA	NA	NA	NA	NA	NA	NA	NA	NA	NA	0	NA	NA	NA	NA	NA	NA	NA	NA	NA	NA	0.355728854	5752	-5.23686789773981	-5.77193366032584	7.73231810969459
14869	chr1	-	ENSG00000168264.6	processed_transcript,	protein_coding	62.5302	82.2436	15329	234742977	234743840	864	protein_coding	KNOWN	IRF2BP2	processed_transcript	IRF2BP2-003	234743840	1	5768	72.3869	5768	1	3	-1499|-1761.5|-1835	4|4|6	0.125|0.0967741935483871|0.0476190476190476	0.0625|0.258064516129032|0.142857142857143	0.0625|0|0	32|31|42	NA|7|NA	NA|6|NA	NA|3|NA	-|+|+	0	NA	NA	NA	NA	NA	NA	NA	NA	NA	NA	0.629274145	5753	6.17765672845199	-4.32189916625644	7.54866167786023
14879	chr1	+	ENSG00000227630.1	processed_transcript,	lincRNA	0.0530366	0.099268	15339	234861148	234867390	6243	lincRNA	NOVEL	RP4-781K5.8	processed_transcript	RP4-781K5.8-001	234861148	1	5775	0.0761523	5775	1	1	-1253	5	0.285714286	0	0	28	NA	NA	NA	+	2	514.5|1571	5|4	0.135135135135135|0.125	0.135135135135135|0.0416666666666667	0.108108108108108|0.0833333333333333	37|24	NA|NA	NA|NA	NA|NA	-|+	0.50209958	5760	-3.71496857921469	-4.67296574717975	7.25148435664053
14892	chr1	-	ENSG00000207181.1	snoRNA,	snoRNA	0.106073	0	15352	235291118	235291252	135	snoRNA	KNOWN	SNORA14B	snoRNA	SNORA14B-201	235291252	1	5783	0.0530365	5783	1	0	NA	NA	NA	NA	NA	NA	NA	NA	NA	NA	0	NA	NA	NA	NA	NA	NA	NA	NA	NA	NA	0.474905019	5768	-4.23687061793002	-5.46746954418282	6.57905350110756
14893	chr1	-	ENSG00000173726.6	protein_coding,	protein_coding	5.72796	3.42475	15353	235272651	235292251	19601	protein_coding	KNOWN	TOMM20	protein_coding	TOMM20-001	235292251	1	5784	4.576355	5784	1	0	NA	NA	NA	NA	NA	NA	NA	NA	NA	NA	0	NA	NA	NA	NA	NA	NA	NA	NA	NA	NA	0.436312737	5769	2.19419897013954	-2.08619494204948	7.85473384947972
14906	chr1	-	ENSG00000054267.15	protein_coding,	protein_coding	2.49272	1.53865	15369	235341115	235377231	36117	protein_coding	KNOWN	ARID4B	protein_coding	ARID4B-006	235377231	1	5787	2.015685	5787	1	0	NA	NA	NA	NA	NA	NA	NA	NA	NA	NA	0	NA	NA	NA	NA	NA	NA	NA	NA	NA	NA	0.338532294	5772	1.01127020012483	-5.58720326112291	2.29819142716119
14931	chr1	+	ENSG00000116957.8	protein_coding,	protein_coding	10.8725	8.09035	15394	235530745	235612214	81470	protein_coding	KNOWN	TBCE	protein_coding	TBCE-202	235530745	1	5795	9.481425	5795	1	0	NA	NA	NA	NA	NA	NA	NA	NA	NA	NA	0	NA	NA	NA	NA	NA	NA	NA	NA	NA	NA	0.458308338	5780	3.24510390363149	-1.18836125305568	6.41947837517917
14990	chr1	-	ENSG00000086619.9	protein_coding,	protein_coding	2.33361	3.67292	15455	236378855	236445285	66431	protein_coding	KNOWN	ERO1LB	protein_coding	ERO1LB-001	236445285	1	5830	3.003265	5830	1	2	-8.5|-246	4|4	0.0909090909090909|0.0769230769230769	0.151515151515152|0.115384615384615	0.0909090909090909|0.0384615384615385	33|26	NA|NA	NA|NA	NA|NA	-|+	1	393.5	5	0.086956522	0.217391304	0	23	NA	NA	NA	-	0.449310138	5815	1.58653178002931	-1.09295241816614	5.5560985342276
14997	chr1	+	ENSG00000244457.1	processed_pseudogene,	pseudogene	7.05387	6.35316	15462	236646465	236647764	1300	pseudogene	KNOWN	ENO1P1	processed_pseudogene	ENO1P1-001	236646465	1	5834	6.703515	5834	1	0	NA	NA	NA	NA	NA	NA	NA	NA	NA	NA	0	NA	NA	NA	NA	NA	NA	NA	NA	NA	NA	0.439512098	5819	2.74491777367835	-5.41728597065857	2.3697199752138
15017	chr1	-	ENSG00000223776.4	processed_transcript,	processed_transcript	0.63644	0.893412	15482	236686369	236687808	1440	processed_transcript	NOVEL	RP11-385F5.2	processed_transcript	RP11-385F5.2-001	236687808	1	5836	0.764926	5836	1	0	NA	NA	NA	NA	NA	NA	NA	NA	NA	NA	2	923.5|615	4|4	0.0476190476190476|0.05	0.19047619047619|0.1	0.0952380952380952|0.05	21|20	NA|NA	NA|NA	NA|NA	-|+	0.410317936	5821	-0.386607908646631	-3.97935055773908	6.86654710395129
15018	chr1	+	ENSG00000116977.12	protein_coding,	protein_coding	1.21984	1.63792	15483	236687881	236712096	24216	protein_coding	KNOWN	LGALS8	protein_coding	LGALS8-007	236687881	1	5837	1.42888	5837	1	2	-996.5|-688	4|4	0.0476190476190476|0.05	0.19047619047619|0.1	0.0952380952380952|0.05	21|20	NA|NA	NA|NA	NA|NA	-|+	0	NA	NA	NA	NA	NA	NA	NA	NA	NA	NA	0.479704059	5822	0.514884761308246	-3.87830019351894	5.670421354727
15030	chr1	-	ENSG00000119285.6	protein_coding,protein_coding,	protein_coding	50.2257	69.0906	15495	236713971	236767804	53834	protein_coding	KNOWN	HEATR1	protein_coding	HEATR1-002	236767804	1	5839	119.3163	5839	1	0	NA	NA	NA	NA	NA	NA	NA	NA	NA	NA	0	NA	NA	NA	NA	NA	NA	NA	NA	NA	NA	0.392921416	5824	6.89864733526233	-2.03740805347552	6.37270851786759
15039	chr1	+	ENSG00000077522.6	processed_transcript,	protein_coding	0	0.049634	15504	236917199	236925866	8668	protein_coding	KNOWN	ACTN2	processed_transcript	ACTN2-002	236917199	1	5840	0.024817	5840	1	0	NA	NA	NA	NA	NA	NA	NA	NA	NA	NA	0	NA	NA	NA	NA	NA	NA	NA	NA	NA	NA	0.420515897	5825	-5.33252746377914	-4.30184202714019	3.09389952290541
15040	chr1	+	ENSG00000116984.7	protein_coding,	protein_coding	12.0924	15.8333	15505	236958581	237063493	104913	protein_coding	KNOWN	MTR	protein_coding	MTR-201	236958581	1	5841	13.96285	5841	1	0	NA	NA	NA	NA	NA	NA	NA	NA	NA	NA	0	NA	NA	NA	NA	NA	NA	NA	NA	NA	NA	0.436712657	5826	3.80352153938723	-1.16229569755564	6.83814510085088
15084	chr1	-	ENSG00000215808.2	processed_transcript,	lincRNA	0.15911	0.099268	15550	238643684	238649323	5640	lincRNA	NOVEL	RP11-371I1.2	processed_transcript	RP11-371I1.2-001	238649323	1	5875	0.129189	5875	1	0	NA	NA	NA	NA	NA	NA	NA	NA	NA	NA	1	423	4	0.15	0.05	0.05	20	2	1	4	+	0.370725855	5860	-2.9524448601578	-4.89106480618434	3.09660055841204
15165	chr1	+	ENSG00000174371.11	protein_coding,	protein_coding	5.14455	3.67292	15636	242011482	242053241	41760	protein_coding	KNOWN	EXO1	protein_coding	EXO1-001	242011482	1	5923	4.408735	5923	1	0	NA	NA	NA	NA	NA	NA	NA	NA	NA	NA	0	NA	NA	NA	NA	NA	NA	NA	NA	NA	NA	0.397520496	5908	2.14036476212588	-2.05408674389637	6.06809481718003
15284	chr1	-	ENSG00000035687.7	protein_coding,	protein_coding	2.33361	1.88609	15758	244587656	244615045	27390	protein_coding	KNOWN	ADSS	protein_coding	ADSS-002	244615045	1	5970	2.10985	5970	1	0	NA	NA	NA	NA	NA	NA	NA	NA	NA	NA	2	543.5|143.5	4|4	0.0344827586206897|0.12	0.103448275862069|0.28	0.0689655172413793|0.04	29|25	NA|5	NA|3	NA|5	+|-	0.454109178	5955	1.07714043402791	-2.33569192036567	6.56293853439969
15300	chr1	+	ENSG00000121644.14	processed_transcript,	protein_coding	5.9401	4.36779	15774	244816428	244819823	3396	protein_coding	KNOWN	PPPDE1	processed_transcript	PPPDE1-003	244816428	1	5975	5.153945	5975	1	0	NA	NA	NA	NA	NA	NA	NA	NA	NA	NA	2	252|593	4|4	0.0769230769230769|0.0666666666666667	0.307692307692308|0.3	0.0384615384615385|0.0333333333333333	26|30	NA|NA	NA|NA	NA|NA	-|-	0.452509498	5960	2.36567714165026	-1.31796249376667	6.61287156376834
15334	chr1	+	ENSG00000203666.7	processed_transcript,	protein_coding	0.47733	0.347438	15811	245270481	245285823	15343	protein_coding	KNOWN	EFCAB2	processed_transcript	EFCAB2-011	245270481	1	5987	0.412384	5987	1	0	NA	NA	NA	NA	NA	NA	NA	NA	NA	NA	2	634|953	4|4	0.0909090909090909|0.0909090909090909	0.136363636363636|0.0909090909090909	0.181818181818182|0.136363636363636	22|22	5|4	2|1	2|4	-|-	0.452109578	5972	-1.27793973591666	-2.69805184665347	6.01036827088167
15373	chr1	-	ENSG00000185420.13	protein_coding,	protein_coding	5.40974	6.65096	15850	245912644	246670559	757916	protein_coding	KNOWN	SMYD3	protein_coding	SMYD3-202	246670559	1	6010	6.03035	6010	1	2	-78.5|-1367.5	4|5	0|0.037037037037037	0.173913043478261|0.0740740740740741	0.0434782608695652|0.185185185185185	23|27	NA|NA	NA|NA	NA|NA	+|+	2	602|261	5|4	0.0384615384615385|0.0357142857142857	0.115384615384615|0.107142857142857	0.153846153846154|0.107142857142857	26|28	NA|NA	NA|NA	NA|NA	-|-	0.587482503	5995	2.59224173821336	-1.39630454886764	4.9139142154037
15407	chr1	-	ENSG00000153207.10	protein_coding,	protein_coding	8.43283	8.88449	15885	247079616	247095280	15665	protein_coding	KNOWN	AHCTF1	protein_coding	AHCTF1-005	247095280	1	6031	8.65866	6031	1	0	NA	NA	NA	NA	NA	NA	NA	NA	NA	NA	1	416.5	5	0.16	0	0.08	25	NA	NA	NA	-	0.443311338	6016	3.11414377311166	-1.28594878195479	7.3273030008577
15416	chr1	-	ENSG00000135747.7	protein_coding,	protein_coding	11.4029	9.03339	15894	247200086	247242057	41972	protein_coding	KNOWN	ZNF670	protein_coding	ZNF670-001	247242057	1	6035	10.218145	6035	1	0	NA	NA	NA	NA	NA	NA	NA	NA	NA	NA	0	NA	NA	NA	NA	NA	NA	NA	NA	NA	NA	0.402319536	6020	3.35306140836402	-1.94063918089458	6.84890342234298
15554	chr1	+	ENSG00000171161.7	protein_coding,	protein_coding	4.93241	3.57365	16032	249132530	249141484	8955	protein_coding	KNOWN	ZNF672	protein_coding	ZNF672-006	249132530	1	6131	4.25303	6131	1	0	NA	NA	NA	NA	NA	NA	NA	NA	NA	NA	2	243.5|623	6|6	0.179487179487179|0.157894736842105	0.128205128205128|0.105263157894737	0.0769230769230769|0.131578947368421	39|38	NA|NA	NA|NA	NA|NA	+|+	0.445710858	6116	2.08849103147404	-1.99308584955146	7.25348263986925
15586	chr1	+	ENSG00000185220.7	protein_coding,	protein_coding	1.06073	1.29048	16067	249200442	249212772	12331	protein_coding	KNOWN	PGBD2	protein_coding	PGBD2-001	249200442	1	6134	1.175605	6134	1	1	-206	4	0.166666667	0	0.111111111	18	1	1	3	+	3	359|411|1990.5	7|9|4	0.15|0.0869565217391304|0.12	0.125|0.173913043478261|0.08	0.1|0.0652173913043478|0.2	40|46|25	NA|NA|NA	NA|NA|NA	NA|NA|NA	+|+|-	0.411117776	6119	0.233403400083394	-1.55766256770292	5.61117261721207
15593	chr2	-	ENSG00000184731.5	processed_transcript,	protein_coding	0.265183	0.198536	61015	41221	46870	5650	protein_coding	KNOWN	FAM110C	processed_transcript	FAM110C-002	46870	2	6137	0.2318595	6137	1	1	-1986.5	4	0.151515152	0.090909091	0.090909091	33	NA	NA	NA	+	8	980.5|721|548|359.5|296|243|204|167	4|5|4|4|4|5|5|4	0.037037037037037|0.0333333333333333|0.0333333333333333|0.08|0.15|0.0357142857142857|0.125|0.05	0.148148148148148|0.3|0.3|0.24|0.1|0.25|0.15625|0.25	0.185185185185185|0|0.1|0.12|0.05|0|0.03125|0	27|30|30|25|20|28|32|20	NA|NA|NA|3|NA|NA|NA|4	NA|NA|NA|5|NA|NA|NA|3	NA|NA|NA|4|NA|NA|NA|1	+|+|+|-|-|-|-|-	0.424115177	6122	-2.10867725529114	-3.43438718697595	2.94043139646132
15599	chr2	-	ENSG00000035115.15	retained_intron,	protein_coding	13.1531	13.9968	61021	232915	249770	16856	protein_coding	KNOWN	SH3YL1	retained_intron	SH3YL1-025	249770	2	6139	13.57495	6139	1	0	NA	NA	NA	NA	NA	NA	NA	NA	NA	NA	0	NA	NA	NA	NA	NA	NA	NA	NA	NA	NA	0.386722655	6124	3.76287497911332	-4.05406874754074	5.51784280266085
15611	chr2	-	ENSG00000035115.15	protein_coding,processed_transcript,processed_transcript,protein_coding,processed_transcript,protein_coding,processed_transcript,	protein_coding	4.87937	5.06267	61035	239561	264810	25250	protein_coding	KNOWN	SH3YL1	protein_coding	SH3YL1-004	264810	2	6141	34.79714	6141	1	1	-370	6	0.142857143	0.166666667	0.071428571	42	NA	NA	NA	-	3	1352.5|463.5|49	4|4|4	0.0967741935483871|0.0434782608695652|0.05	0.258064516129032|0.217391304347826|0.2	0.032258064516129|0.0869565217391304|0.05	31|23|20	NA|2|NA	NA|1|NA	NA|6|NA	-|-|-	0.422715457	6126	5.1208968297724	-2.04334262380142	3.83017499143591
15622	chr2	+	ENSG00000143727.10	protein_coding,nonsense_mediated_decay,	protein_coding	237.286	279.588	61046	264965	277375	12411	protein_coding	KNOWN	ACP1	protein_coding	ACP1-201	264965	2	6142	516.874	6142	1	3	-1507.5|-618.5|-204	4|4|4	0.0967741935483871|0.0434782608695652|0.05	0.258064516129032|0.217391304347826|0.2	0.032258064516129|0.0869565217391304|0.05	31|23|20	NA|2|NA	NA|1|NA	NA|6|NA	-|-|-	1	215	6	0.142857143	0.166666667	0.071428571	42	NA	NA	NA	-	0.484903019	6127	9.01366882286843	-2.43439499774137	7.62660274798727
15625	chr2	+	ENSG00000143727.10	retained_intron,	protein_coding	0.0530366	0.148902	61049	274573	277506	2934	protein_coding	KNOWN	ACP1	retained_intron	ACP1-011	274573	2	6144	0.1009693	6144	1	0	NA	NA	NA	NA	NA	NA	NA	NA	NA	NA	0	NA	NA	NA	NA	NA	NA	NA	NA	NA	NA	0.418116377	6129	-3.30801139072648	-5.06849541826772	2.98017304759302
15649	chr2	-	ENSG00000151353.10	protein_coding,	protein_coding	1.85628	1.43939	61074	669423	676704	7282	protein_coding	KNOWN	TMEM18	protein_coding	TMEM18-003	676704	2	6154	1.647835	6154	1	3	-103.5|-305|-365.5	4|8|8	0.0434782608695652|0.0227272727272727|0.0204081632653061	0.173913043478261|0.204545454545455|0.244897959183673	0.173913043478261|0.0909090909090909|0.102040816326531	23|44|49	NA|NA|NA	NA|NA|NA	NA|NA|NA	-|-|-	0	NA	NA	NA	NA	NA	NA	NA	NA	NA	NA	0.49630074	6139	0.720571790701216	-1.22363990435354	5.23049541603031
15651	chr2	+	ENSG00000233296.1	processed_transcript,	processed_transcript	0.901623	0.297804	61076	677186	682802	5617	processed_transcript	NOVEL	AC092159.2	processed_transcript	AC092159.2-001	677186	2	6155	0.5997135	6155	1	3	-378.5|-177|-116.5	4|8|8	0.0434782608695652|0.0227272727272727|0.0204081632653061	0.173913043478261|0.204545454545455|0.244897959183673	0.173913043478261|0.0909090909090909|0.102040816326531	23|44|49	NA|NA|NA	NA|NA|NA	NA|NA|NA	-|-|-	0	NA	NA	NA	NA	NA	NA	NA	NA	NA	NA	0.557688462	6140	-0.737654645572349	-1.39440704246693	7.7652483604478
15739	chr2	-	ENSG00000032389.8	protein_coding,	protein_coding	86.9271	61.1988	61171	3192696	3381601	188906	protein_coding	KNOWN	TSSC1	protein_coding	TSSC1-003	3381601	2	6193	74.06295	6193	1	0	NA	NA	NA	NA	NA	NA	NA	NA	NA	NA	1	44.5	4	0.2	0.08	0.12	25	1	7	4	-	0.486902619	6178	6.21068010950101	-2.00172651556353	7.84397384910271
15741	chr2	+	ENSG00000171853.10	protein_coding,protein_coding,	protein_coding	5.09152	3.47438	61173	3383446	3488857	105412	protein_coding	KNOWN	TTC15	protein_coding	TTC15-201	3383446	2	6194	8.5659	6194	1	1	-1889.5	4	0.2	0.08	0.12	25	1	7	4	-	2	332.5|982.5	4|5	0|0.185185185185185	0.217391304347826|0.037037037037037	0.0869565217391304|0.111111111111111	23|27	NA|NA	NA|NA	NA|NA	+|+	0.473905219	6179	3.09860483502183	-1.83032640795711	8.13766547221742
15759	chr2	-	ENSG00000182551.7	protein_coding,	protein_coding	0.15911	0.099268	61199	3502224	3521518	19295	protein_coding	KNOWN	ADI1	protein_coding	ADI1-002	3521518	2	6198	0.129189	6198	1	1	-1689	6	0	0.260869565	0.108695652	46	NA	NA	NA	+	0	NA	NA	NA	NA	NA	NA	NA	NA	NA	NA	0.50489902	6183	-2.9524448601578	-5.58028417923396	4.06856833144237
15761	chr2	-	ENSG00000182551.7	protein_coding,	protein_coding	0	0.099268	61201	3501693	3523507	21815	protein_coding	KNOWN	ADI1	protein_coding	ADI1-001	3523507	2	6200	0.049634	6200	1	0	NA	NA	NA	NA	NA	NA	NA	NA	NA	NA	1	300	6	0	0.260869565	0.108695652	46	NA	NA	NA	+	0.456508698	6185	-4.33252746377914	-4.44847710450435	7.332847607284
15774	chr2	+	ENSG00000171863.8	protein_coding,	protein_coding	0.530366	0.297804	61214	3622795	3628509	5715	protein_coding	KNOWN	RPS7	protein_coding	RPS7-001	3622795	2	6206	0.414085	6206	1	0	NA	NA	NA	NA	NA	NA	NA	NA	NA	NA	2	311|499	6|4	0.05|0	0.2|0.142857142857143	0.05|0.25	40|28	NA|NA	NA|NA	NA|NA	+|+	0.442911418	6191	-1.27200115206261	-2.33060309114788	6.13542013161484
15775	chr2	-	ENSG00000247886.1	lincRNA,	lincRNA	0.15911	0.24817	61215	3616113	3622828	6716	lincRNA	KNOWN	AC108488.1	lincRNA	AC108488.1-201	3622828	2	6207	0.20364	6207	1	2	-278|-466	6|4	0.05|0	0.2|0.142857142857143	0.05|0.25	40|28	NA|NA	NA|NA	NA|NA	+|+	0	NA	NA	NA	NA	NA	NA	NA	NA	NA	NA	0.450309938	6192	-2.29590712417299	-2.47072075431705	6.7884718094172
15777	chr2	+	ENSG00000171863.8	retained_intron,protein_coding,	protein_coding	53.7792	59.4616	61217	3622915	3628509	5595	protein_coding	KNOWN	RPS7	protein_coding	RPS7-008	3622915	2	6208	113.2408	6208	1	0	NA	NA	NA	NA	NA	NA	NA	NA	NA	NA	2	191|379	6|4	0.05|0	0.2|0.142857142857143	0.05|0.25	40|28	NA|NA	NA|NA	NA|NA	+|+	0.447710458	6193	6.82325003621823	-2.39744053486019	7.69831855988399
15782	chr2	+	ENSG00000252531.1	snoRNA,	snoRNA	0.79555	0.843778	61222	3628160	3628322	163	snoRNA	NOVEL	SNORA73.6	snoRNA	SNORA73.6-201	3628160	2	6209	0.819664	6209	1	0	NA	NA	NA	NA	NA	NA	NA	NA	NA	NA	0	NA	NA	NA	NA	NA	NA	NA	NA	NA	NA	0.435112977	6194	-0.286895459393953	-5.49974450214989	2.29819142716119
15788	chr2	+	ENSG00000118004.12	protein_coding,protein_coding,	protein_coding	0	0.049634	61228	3649496	3691942	42447	protein_coding	KNOWN	COLEC11	protein_coding	COLEC11-202	3649496	2	6210	0.049634	6210	1	2	-1230|-125	4|4	0.0416666666666667|0.111111111111111	0.125|0.111111111111111	0.166666666666667|0	24|18	NA|NA	NA|NA	NA|NA	+|-	1	1327.5	5	0.378378378	0.054054054	0	37	NA	NA	NA	-	0.522095581	6195	-4.33252746377914	-5.02087897076332	3.03379441091509
15794	chr2	+	ENSG00000151360.5	protein_coding,	protein_coding	0.0530366	0.049634	61234	3705785	3750261	44477	protein_coding	KNOWN	ALLC	protein_coding	ALLC-001	3705785	2	6214	0.0513353	6214	1	4	-1385.5|-1348|-957.5|-177.5	5|4|4|5	0.121212121212121|0.125|0|0.225806451612903	0.0606060606060606|0.0833333333333333|0.0476190476190476|0.225806451612903	0.151515151515152|0.125|0.19047619047619|0.032258064516129	33|24|21|31	NA|NA|NA|NA	NA|NA|NA|NA	NA|NA|NA|NA	+|+|+|+	0	NA	NA	NA	NA	NA	NA	NA	NA	NA	NA	0.558088382	6199	-4.28390497366436	-4.6546808211353	3.73578297386957
15835	chr2	-	ENSG00000231610.1	processed_pseudogene,	pseudogene	0	0.049634	61275	6636009	6636930	922	pseudogene	KNOWN	AC021021.1	processed_pseudogene	AC021021.1-001	6636930	2	6240	0.024817	6240	1	0	NA	NA	NA	NA	NA	NA	NA	NA	NA	NA	0	NA	NA	NA	NA	NA	NA	NA	NA	NA	NA	0.383323335	6225	-5.33252746377914	-5.33928670539719	2.29113438058641
15859	chr2	+	ENSG00000151692.9	protein_coding,	protein_coding	5.99314	7.04803	61299	7057586	7180361	122776	protein_coding	KNOWN	RNF144A	protein_coding	RNF144A-201	7057586	2	6249	6.520585	6249	1	1	-139	4	0	0.333333333	0.1	30	NA	NA	NA	+	4	65.5|383|544.5|1661	5|5|5|4	0.027027027027027|0.166666666666667|0.0909090909090909|0.25	0.27027027027027|0.208333333333333|0.363636363636364|0.05	0.0540540540540541|0|0.0303030303030303|0.05	37|24|33|20	NA|NA|NA|2	NA|NA|NA|1	NA|NA|NA|5	+|-|+|+	0.469106179	6234	2.70500140291321	-2.4320574776455	4.52539289133358
15866	chr2	+	ENSG00000151692.9	processed_transcript,	protein_coding	0.212147	0	61306	7073215	7164527	91313	protein_coding	KNOWN	RNF144A	processed_transcript	RNF144A-004	7073215	2	6251	0.1060735	6251	1	1	-1634.5	4	0.142857143	0	0.238095238	21	NA	NA	NA	+	0	NA	NA	NA	NA	NA	NA	NA	NA	NA	NA	0.397520496	6236	-3.23686381746411	-5.07334465483146	4.13753694105735
15904	chr2	-	ENSG00000235092.1	processed_transcript,	processed_transcript	0.31822	0.595608	61345	8811114	8821993	10880	processed_transcript	NOVEL	AC011747.7	processed_transcript	AC011747.7-002	8821993	2	6273	0.456914	6273	1	1	-58	4	0	0.227272727	0.045454545	22	NA	NA	NA	-	2	160|79.5	7|10	0.238095238095238|0.0869565217391304	0|0.130434782608696	0.0238095238095238|0.0144927536231884	42|69	NA|NA	NA|NA	NA|NA	-|-	0.514097181	6258	-1.13000544699818	-1.93015486257129	4.9961179004773
15906	chr2	+	ENSG00000115738.5	protein_coding,	protein_coding	13.1531	9.08303	61347	8822186	8823137	952	protein_coding	KNOWN	ID2	protein_coding	ID2-002	8822186	2	6274	11.118065	6274	1	3	-353|-272.5|-135	7|10|4	0.238095238095238|0.0869565217391304|0	0|0.130434782608696|0.227272727272727	0.0238095238095238|0.0144927536231884|0.0454545454545455	42|69|22	NA|NA|NA	NA|NA|NA	NA|NA|NA	-|-|-	0	NA	NA	NA	NA	NA	NA	NA	NA	NA	NA	0.528694261	6259	3.47483381659826	-2.23445841290254	7.77330018229419
15917	chr2	-	ENSG00000134313.9	protein_coding,protein_coding,protein_coding,	protein_coding	11.2438	12.8552	61360	8868987	8977755	108769	protein_coding	KNOWN	KIDINS220	protein_coding	KIDINS220-001	8977755	2	6275	36.1485	6275	1	4	-15.5|-54|-93|-1972	4|5|4|4	0.142857142857143|0.0714285714285714|0.0384615384615385|0.0833333333333333	0.142857142857143|0.107142857142857|0.192307692307692|0	0.0952380952380952|0.0357142857142857|0.0384615384615385|0.166666666666667	21|28|26|24	NA|NA|NA|NA	NA|NA|NA|NA	NA|NA|NA|NA	+|+|+|-	2	428|221	5|8	0.0666666666666667|0.103448275862069	0.166666666666667|0.137931034482759	0.166666666666667|0.103448275862069	30|58	NA|NA	NA|NA	NA|NA	-|-	0.50069986	6260	5.17586387795699	-1.3654959459276	6.58391629704316
15938	chr2	+	ENSG00000151693.5	processed_transcript,	protein_coding	0.15911	0.049634	61382	9528423	9540898	12476	protein_coding	KNOWN	ASAP2	processed_transcript	ASAP2-004	9528423	2	6286	0.104372	6286	1	0	NA	NA	NA	NA	NA	NA	NA	NA	NA	NA	0	NA	NA	NA	NA	NA	NA	NA	NA	NA	NA	0.472505499	6271	-3.26019336458042	-4.63304056690044	2.79626716116405
15955	chr2	-	ENSG00000119185.8	protein_coding,	protein_coding	22.2224	20.201	61399	9546796	9563609	16814	protein_coding	KNOWN	ITGB1BP1	protein_coding	ITGB1BP1-009	9563609	2	6287	21.2117	6287	1	0	NA	NA	NA	NA	NA	NA	NA	NA	NA	NA	1	223.5	7	0.066666667	0.2	0.088888889	45	NA	NA	NA	-	0.449510098	6272	4.40678834438791	-0.475733679732129	6.50077671590925
15961	chr2	+	ENSG00000119203.8	protein_coding,	protein_coding	143.199	136.692	61405	9563780	9572817	9038	protein_coding	KNOWN	CPSF3	protein_coding	CPSF3-003	9563780	2	6288	139.9455	6288	1	1	-394.5	7	0.066666667	0.2	0.088888889	45	NA	NA	NA	-	1	1939.5	4	0.148148148	0.037037037	0.148148148	27	NA	NA	NA	+	0.49910018	6273	7.12872128703167	-0.796357793924902	7.94676832712875
15973	chr2	+	ENSG00000134330.14	protein_coding,protein_coding,	protein_coding	13.8426	9.9268	61417	9614704	9636672	21969	protein_coding	KNOWN	IAH1	protein_coding	IAH1-005	9614704	2	6289	23.7694	6289	1	2	-87.5|-27	4|4	0.04|0	0.2|0.166666666666667	0.16|0	25|18	4|NA	4|NA	5|NA	-|-	0	NA	NA	NA	NA	NA	NA	NA	NA	NA	NA	0.487302539	6274	4.57103358134189	-2.20755440223411	5.2433799778281
15992	chr2	-	ENSG00000134308.8	protein_coding,	protein_coding	410.822	301.626	61437	9724101	9771143	47043	protein_coding	KNOWN	YWHAQ	protein_coding	YWHAQ-001	9771143	2	6294	356.224	6294	1	1	-126.5	4	0.111111111	0.111111111	0	27	NA	NA	NA	+	3	544.5|357.5|242.5	5|4|4	0.0344827586206897|0.130434782608696|0	0.241379310344828|0.0434782608695652|0.24	0|0|0.04	29|23|25	NA|NA|NA	NA|NA|NA	NA|NA|NA	+|-|-	0.477704459	6279	8.47664090866952	-0.292296715388094	5.99777129376549
15999	chr2	+	ENSG00000115750.10	protein_coding,	protein_coding	29.8066	26.4549	61444	9983611	10008893	25283	protein_coding	KNOWN	TAF1B	protein_coding	TAF1B-009	9983611	2	6300	28.13075	6300	1	0	NA	NA	NA	NA	NA	NA	NA	NA	NA	NA	2	207.5|435.5	4|5	0.0869565217391304|0.12	0.173913043478261|0.04	0.0434782608695652|0.08	23|25	4|NA	5|NA	1|NA	+|+	0.442711458	6285	4.81407611205674	-1.49410504454691	6.41110094819571
16045	chr2	-	ENSG00000115758.7	protein_coding,	protein_coding	10.183	5.70791	61491	10580894	10588453	7560	protein_coding	KNOWN	ODC1	protein_coding	ODC1-201	10588453	2	6313	7.945455	6313	1	4	-238.5|-268.5|-615|-1240	4|4|4|4	0.0588235294117647|0.0588235294117647|0.125|0	0.117647058823529|0.117647058823529|0.166666666666667|0.0555555555555556	0|0|0.0416666666666667|0.111111111111111	17|17|24|18	NA|NA|NA|NA	NA|NA|NA|NA	NA|NA|NA|NA	-|-|+|+	2	473|260	4|9	0.0416666666666667|0.0769230769230769	0.25|0.288461538461538	0.125|0.0192307692307692	24|52	5|NA	5|NA	1|NA	+|-	0.544291142	6298	2.99012983850998	-1.57561101285362	6.1240801127416
16051	chr2	-	ENSG00000115761.11	protein_coding,protein_coding,retained_intron,	protein_coding	12.1454	13.5005	61498	10813448	10830101	16654	protein_coding	KNOWN	NOL10	retained_intron	NOL10-003	10830101	2	6316	38.46885	6316	1	1	-1343.5	4	0.148148148	0	0.185185185	27	NA	NA	NA	-	0	NA	NA	NA	NA	NA	NA	NA	NA	NA	NA	0.475504899	6301	5.26561879678351	-1.89485292837316	8.139798969933
16073	chr2	+	ENSG00000162976.8	nonsense_mediated_decay,	protein_coding	2.01539	2.87877	61521	11295557	11318083	22527	protein_coding	KNOWN	PQLC3	nonsense_mediated_decay	PQLC3-005	11295557	2	6329	2.44708	6329	1	4	-1954.5|-309|-231|-107	4|7|4|16	0.275862068965517|0.113636363636364|0.115384615384615|0.025	0.0344827586206897|0.113636363636364|0.115384615384615|0.2375	0|0.0227272727272727|0.0769230769230769|0	29|44|26|80	NA|NA|NA|NA	NA|NA|NA|NA	NA|NA|NA|NA	+|+|+|+	4	399|1221.5|1350|1833.5	5|4|3|5	0.15|0.0689655172413793|0.0555555555555556|0.137931034482759	0.2|0.310344827586207|0|0.103448275862069	0.1|0.0689655172413793|0.0555555555555556|0.172413793103448	40|29|18|29	NA|2|NA|NA	NA|7|NA|NA	NA|7|NA|NA	+|-|+|+	0.533893221	6314	1.2910612668103	-0.835211076875278	5.35212318859431
16092	chr2	-	ENSG00000230952.1	processed_transcript,	processed_transcript	0.0530366	0.148902	61541	11497641	11505762	8122	processed_transcript	PUTATIVE	AC099344.2	processed_transcript	AC099344.2-001	11505762	2	6336	0.1009693	6336	1	0	NA	NA	NA	NA	NA	NA	NA	NA	NA	NA	1	1342	4	0.208333333	0.166666667	0.041666667	24	6	3	3	+	0.435112977	6321	-3.30801139072648	-4.30184202714019	7.05595056895133
16110	chr2	+	ENSG00000196208.9	protein_coding,	protein_coding	2.06843	2.92841	61559	11682816	11721391	38576	protein_coding	KNOWN	GREB1	protein_coding	GREB1-003	11682816	2	6341	2.49842	6341	1	3	-1419|-899.5|-54.5	4|4|4	0.272727272727273|0.241379310344828|0.2	0.0909090909090909|0.103448275862069|0.08	0|0.0344827586206897|0	22|29|25	2|NA|NA	3|NA|NA	5|NA|NA	+|-|+	1	1225	4	0.166666667	0.033333333	0.166666667	30	NA	NA	NA	+	0.49910018	6326	1.32101602337655	-4.25426180187568	6.01700454092156
16114	chr2	+	ENSG00000196208.9	retained_intron,	protein_coding	0.212147	0.049634	61563	11696744	11703267	6524	protein_coding	KNOWN	GREB1	retained_intron	GREB1-008	11696744	2	6343	0.1308905	6343	1	0	NA	NA	NA	NA	NA	NA	NA	NA	NA	NA	0	NA	NA	NA	NA	NA	NA	NA	NA	NA	NA	0.444311138	6328	-2.93356770425242	-5.12275515546978	2.66457568174361
16124	chr2	+	ENSG00000228496.1	processed_transcript,	processed_transcript	5.30366	3.92109	61573	11821586	11823449	1864	processed_transcript	NOVEL	AC106875.1	processed_transcript	AC106875.1-002	11821586	2	6351	4.612375	6351	1	0	NA	NA	NA	NA	NA	NA	NA	NA	NA	NA	0	NA	NA	NA	NA	NA	NA	NA	NA	NA	NA	0.545290942	6336	2.20550981321667	-5.03027736244318	4.24482680674304
16131	chr2	-	ENSG00000230790.2	processed_transcript,	processed_transcript	0.371256	0.297804	61580	11881123	11885427	4305	processed_transcript	PUTATIVE	AC012456.4	processed_transcript	AC012456.4-001	11885427	2	6354	0.33453	6354	1	1	-1269.5	8	0.12244898	0.163265306	0	49	NA	NA	NA	-	2	1676.5|540	4|4	0.142857142857143|0.181818181818182	0.142857142857143|0.0454545454545455	0.0476190476190476|0.0454545454545455	21|22	NA|NA	NA|NA	NA|NA	-|+	0.557488502	6339	-1.57979250013274	-3.69710664395428	5.21370529148898
16133	chr2	+	ENSG00000134324.7	protein_coding,	protein_coding	2.75791	3.52402	61582	11886760	11907984	21225	protein_coding	KNOWN	LPIN1	protein_coding	LPIN1-006	11886760	2	6355	3.140965	6355	1	2	-1873|-63.5	4|8	0.181818181818182|0.122448979591837	0.0454545454545455|0.163265306122449	0.0454545454545455|0	22|49	NA|NA	NA|NA	NA|NA	+|-	0	NA	NA	NA	NA	NA	NA	NA	NA	NA	NA	0.541691662	6340	1.65120786702434	-1.21156147833748	5.82447277848338
16178	chr2	-	ENSG00000151779.8	protein_coding,protein_coding,	protein_coding	15.3806	14.0961	61633	15307033	15701454	394422	protein_coding	KNOWN	NBAS	protein_coding	NBAS-001	15701454	2	6373	29.4767	6373	1	0	NA	NA	NA	NA	NA	NA	NA	NA	NA	NA	2	308|245	5|4	0.0666666666666667|0.1	0.133333333333333|0.05	0.133333333333333|0.15	30|20	NA|NA	NA|NA	NA|NA	-|-	0.415116977	6358	4.8815031145672	-3.1090350360281	6.71033820057329
16184	chr2	+	ENSG00000079785.7	protein_coding,	protein_coding	104.217	95.9426	61639	15732005	15771022	39018	protein_coding	KNOWN	DDX1	protein_coding	DDX1-203	15732005	2	6375	100.0798	6375	1	0	NA	NA	NA	NA	NA	NA	NA	NA	NA	NA	2	294|1047	4|3	0.25|0.115384615384615	0.05|0	0|0.0769230769230769	20|26	NA|NA	NA|NA	NA|NA	-|+	0.473305339	6360	6.6450070013046	-2.334236101282	8.25009188469479
16241	chr2	-	ENSG00000163029.11	protein_coding,protein_coding,	protein_coding	7.42513	8.33852	61698	17846666	17935070	88405	protein_coding	KNOWN	SMC6	protein_coding	SMC6-201	17935070	2	6408	15.76365	6408	1	2	-24|-878.5	4|4	0.125|0.12	0.0625|0.28	0|0.08	16|25	1|4	1|1	1|7	-|-	0	NA	NA	NA	NA	NA	NA	NA	NA	NA	NA	0.389122176	6393	3.97852971770273	-1.89700062492376	7.45600447885637
16244	chr2	+	ENSG00000178295.9	protein_coding,protein_coding,	protein_coding	5.14455	4.9634	61701	17935414	17966632	31219	protein_coding	KNOWN	GEN1	protein_coding	GEN1-001	17935414	2	6409	10.10795	6409	1	1	-320	4	0.125	0.0625	0	16	1	1	1	-	1	534.5	4	0.12	0.28	0.08	25	4	1	7	-	0.435512897	6394	3.33741852786298	-2.53448725005852	7.02407591938475
16293	chr2	-	ENSG00000118965.10	protein_coding,	protein_coding	5.83403	5.60864	61753	20110021	20189883	79863	protein_coding	KNOWN	WDR35	protein_coding	WDR35-002	20189883	2	6428	5.721335	6428	1	0	NA	NA	NA	NA	NA	NA	NA	NA	NA	NA	0	NA	NA	NA	NA	NA	NA	NA	NA	NA	NA	0.376124775	6413	2.5163518206328	-1.40850817203713	6.16938005865227
16295	chr2	+	ENSG00000227210.1	processed_transcript,	processed_transcript	0.106073	0.099268	61755	20189978	20203971	13994	processed_transcript	NOVEL	AC079145.4	processed_transcript	AC079145.4-001	20189978	2	6429	0.1026705	6429	1	0	NA	NA	NA	NA	NA	NA	NA	NA	NA	NA	0	NA	NA	NA	NA	NA	NA	NA	NA	NA	NA	0.434913017	6414	-3.28390637883366	-1.39024123123539	5.97410725845176
16300	chr2	-	ENSG00000068697.6	protein_coding,	protein_coding	1.27288	1.24085	61760	20232411	20251789	19379	protein_coding	KNOWN	LAPTM4A	protein_coding	LAPTM4A-001	20251789	2	6431	1.256865	6431	1	1	-68.5	5	0.068965517	0.172413793	0.068965517	29	NA	NA	NA	+	1	714	5	0.0625	0.0625	0.1875	32	NA	NA	NA	-	0.410717856	6416	0.329829698055996	-1.95847099937298	5.98925728887453
16301	chr2	+	ENSG00000223734.2	processed_transcript,	processed_transcript	0.15911	0.049634	61761	20251895	20254257	2363	processed_transcript	PUTATIVE	RP11-644K8.1	processed_transcript	RP11-644K8.1-001	20251895	2	6432	0.104372	6432	1	2	-820|-37.5	5|5	0.0625|0.0689655172413793	0.0625|0.172413793103448	0.1875|0.0689655172413793	32|29	NA|NA	NA|NA	NA|NA	-|+	0	NA	NA	NA	NA	NA	NA	NA	NA	NA	NA	0.458108378	6417	-3.26019336458042	-1.97368998307708	6.63285575259112
16311	chr2	-	ENSG00000235411.1	processed_pseudogene,	pseudogene	0	0.049634	61771	20439653	20440807	1155	pseudogene	KNOWN	AC007041.2	processed_pseudogene	AC007041.2-001	20440807	2	6437	0.024817	6437	1	2	-1372|-1499	4|5	0.0833333333333333|0.111111111111111	0.25|0.0555555555555556	0|0.0833333333333333	24|36	1|NA	2|NA	6|NA	+|+	0	NA	NA	NA	NA	NA	NA	NA	NA	NA	NA	0.50569886	6422	-5.33252746377914	-3.3190312084292	2.52065056187487
16316	chr2	-	ENSG00000055917.11	protein_coding,protein_coding,	protein_coding	11.4559	8.78522	61777	20451071	20550463	99393	protein_coding	KNOWN	PUM2	protein_coding	PUM2-002	20550463	2	6439	20.24112	6439	1	2	-29.5|-143	3|4	0.0588235294117647|0.1	0|0.05	0.0588235294117647|0	17|20	NA|NA	NA|NA	NA|NA	-|-	0	NA	NA	NA	NA	NA	NA	NA	NA	NA	NA	0.469106179	6424	4.33921721563801	-2.37481554850829	7.64001068308613
16323	chr2	+	ENSG00000143878.8	protein_coding,	protein_coding	91.3821	96.8856	61784	20646835	20649200	2366	protein_coding	KNOWN	RHOB	protein_coding	RHOB-001	20646835	2	6443	94.13385	6443	1	3	-1452.5|-665|-411	6|5|4	0.179487179487179|0.107142857142857|0.0384615384615385	0.128205128205128|0.0714285714285714|0.115384615384615	0.0769230769230769|0.107142857142857|0.153846153846154	39|28|26	NA|NA|NA	NA|NA|NA	NA|NA|NA	-|+|-	3	210.5|1301|1444.5	4|4|6	0.0689655172413793|0.178571428571429|0.121951219512195	0.137931034482759|0.0357142857142857|0.0975609756097561	0.0689655172413793|0.107142857142857|0.121951219512195	29|28|41	NA|NA|NA	NA|NA|NA	NA|NA|NA	-|-|+	0.459108178	6428	6.55664169611584	-1.87090952442977	8.33759694754746
16326	chr2	-	ENSG00000231948.2	processed_transcript,	processed_transcript	0.212147	0.148902	61788	20790535	20792308	1774	processed_transcript	NOVEL	AC012065.6	processed_transcript	AC012065.6-001	20792308	2	6446	0.1805245	6446	1	0	NA	NA	NA	NA	NA	NA	NA	NA	NA	NA	2	1900|211.5	4|4	0.115384615384615|0	0.230769230769231|0.157894736842105	0.115384615384615|0	26|19	2|NA	7|NA	5|NA	+|-	0.531893621	6431	-2.46973344819105	-4.97478398462368	5.64740686772869
16332	chr2	-	ENSG00000118960.7	protein_coding,	protein_coding	10.13	13.1034	61797	20817594	20850857	33264	protein_coding	KNOWN	HS1BP3	protein_coding	HS1BP3-201	20850857	2	6448	11.6167	6448	1	2	-49.5|-1771	5|4	0.142857142857143|0.125	0.2|0.208333333333333	0|0.0833333333333333	35|24	NA|7	NA|3	NA|2	-|+	1	1209.5	4	0.047619048	0.047619048	0.238095238	21	NA	NA	NA	-	0.518896221	6433	3.53812838998149	-0.720466950365683	7.34597826084868
16336	chr2	-	ENSG00000118961.9	protein_coding,protein_coding,	protein_coding	22.1693	19.5062	61801	20974618	21022849	48232	protein_coding	KNOWN	C2orf43	protein_coding	C2orf43-006	21022849	2	6450	41.6755	6450	1	0	NA	NA	NA	NA	NA	NA	NA	NA	NA	NA	1	1462	4	0.090909091	0	0.136363636	22	NA	NA	NA	+	0.429314137	6435	5.38112760287394	-1.56746388554283	7.8445187641762
16385	chr2	-	ENSG00000119778.9	protein_coding,	protein_coding	10.7134	11.0684	61853	24092495	24149931	57437	protein_coding	KNOWN	ATAD2B	protein_coding	ATAD2B-201	24149931	2	6479	10.8909	6479	1	0	NA	NA	NA	NA	NA	NA	NA	NA	NA	NA	0	NA	NA	NA	NA	NA	NA	NA	NA	NA	NA	0.486102779	6464	3.44505127501067	-1.66657169270978	7.94103824881408
16390	chr2	+	ENSG00000173960.8	protein_coding,	protein_coding	5.25063	5.80718	61858	24163289	24227779	64491	protein_coding	KNOWN	UBXN2A	protein_coding	UBXN2A-001	24163289	2	6480	5.528905	6480	1	1	-1874	3	0.1	0.15	0.05	20	NA	NA	NA	-	1	270	4	0.05	0.1	0.05	20	NA	NA	NA	+	0.451709658	6465	2.46699378290223	-2.0739945154554	6.57171332333621
16402	chr2	-	ENSG00000163026.7	protein_coding,	protein_coding	5.83403	7.4451	61871	24252217	24270231	18015	protein_coding	KNOWN	C2orf44	protein_coding	C2orf44-002	24270231	2	6487	6.639565	6487	1	0	NA	NA	NA	NA	NA	NA	NA	NA	NA	NA	1	1236	4	0.107142857	0.035714286	0.107142857	28	NA	NA	NA	+	0.526294741	6472	2.73108872456912	-2.22565949667184	7.06992131036618
16409	chr2	-	ENSG00000115128.6	retained_intron,	protein_coding	183.984	155.206	61879	24296519	24299243	2725	protein_coding	NOVEL	AC008073.5	retained_intron	AC008073.5-002	24299243	2	6489	169.595	6489	1	0	NA	NA	NA	NA	NA	NA	NA	NA	NA	NA	1	1774	4	0.25	0.05	0.05	20	2	2	4	-	0.50329934	6474	7.40594982676583	-1.28173349927161	7.4112161552146
16418	chr2	-	ENSG00000115129.9	protein_coding,	protein_coding	9.17534	10.3735	61889	24300306	24307655	7350	protein_coding	KNOWN	TP53I3	protein_coding	TP53I3-201	24307655	2	6491	9.77442	6491	1	0	NA	NA	NA	NA	NA	NA	NA	NA	NA	NA	1	85	5	0.033333333	0.266666667	0.066666667	30	NA	NA	NA	-	0.453709258	6476	3.28901109751468	-2.20888777573054	5.81354540699633
16425	chr2	+	ENSG00000219626.4	protein_coding,protein_coding,	protein_coding	0.265183	0.198536	61896	24346350	24392506	46157	protein_coding	KNOWN	AC008073.1	protein_coding	AC008073.1-007	24346350	2	6493	0.463719	6493	1	0	NA	NA	NA	NA	NA	NA	NA	NA	NA	NA	1	323	5	0.153846154	0.076923077	0.076923077	26	NA	NA	NA	+	0.446710658	6478	-1.10867725529114	-2.1811429381587	5.39774850920896
16462	chr2	-	ENSG00000184924.4	processed_transcript,	protein_coding	0.0530366	0.347438	61939	25013074	25015922	2849	protein_coding	KNOWN	C2orf79	processed_transcript	C2orf79-002	25015922	2	6510	0.2002373	6510	1	1	-607	5	0.035714286	0.178571429	0.071428571	28	NA	NA	NA	+	1	23.5	4	0.074074074	0.074074074	0.148148148	27	3	6	4	-	0.460307938	6495	-2.32021735191904	-2.03977890076403	6.26803774980086
16467	chr2	+	ENSG00000138092.6	protein_coding,protein_coding,	protein_coding	3.65953	3.27585	61944	25016014	25045245	29232	protein_coding	KNOWN	CENPO	protein_coding	CENPO-201	25016014	2	6511	6.93538	6511	1	1	-115.5	4	0.074074074	0.074074074	0.148148148	27	3	6	4	-	1	515	5	0.035714286	0.178571429	0.071428571	28	NA	NA	NA	+	0.452709458	6496	2.79397493216622	-2.00114885641347	6.88676972259583
16468	chr2	-	ENSG00000184924.4	protein_coding,	protein_coding	49.9605	44.0254	61945	25012855	25016251	3397	protein_coding	KNOWN	C2orf79	protein_coding	C2orf79-001	25016251	2	6512	46.99295	6512	1	1	-278	5	0.035714286	0.178571429	0.071428571	28	NA	NA	NA	+	1	352.5	4	0.074074074	0.074074074	0.148148148	27	3	6	4	-	0.444311138	6497	5.55437243118956	-2.81704329177285	8.01356505283085
16470	chr2	+	ENSG00000138092.6	retained_intron,	protein_coding	8.59194	5.55901	61947	25016314	25037651	21338	protein_coding	KNOWN	CENPO	retained_intron	CENPO-007	25016314	2	6513	7.075475	6513	1	1	-415.5	4	0.074074074	0.074074074	0.148148148	27	3	6	4	-	1	215	5	0.035714286	0.178571429	0.071428571	28	NA	NA	NA	+	0.464507099	6498	2.82282700407757	-2.62503507198835	6.5664317322038
16489	chr2	+	ENSG00000224165.1	processed_transcript,	lincRNA	0.0530366	0	61966	25194259	25195691	1433	lincRNA	NOVEL	AC013267.2	processed_transcript	AC013267.2-001	25194259	2	6517	0.0265183	6517	1	0	NA	NA	NA	NA	NA	NA	NA	NA	NA	NA	1	687	6	0.125	0.125	0.075	40	NA	NA	NA	+	0.399320136	6502	-5.23686789773981	-3.88894730168594	7.46119463514766
16492	chr2	-	ENSG00000115137.7	processed_transcript,protein_coding,processed_transcript,	protein_coding	0.212147	0.099268	61969	25180735	25194485	13751	protein_coding	KNOWN	DNAJC27	processed_transcript	DNAJC27-004	25194485	2	6518	0.4671225	6518	1	1	-461	6	0.125	0.125	0.075	40	NA	NA	NA	+	0	NA	NA	NA	NA	NA	NA	NA	NA	NA	NA	0.453309338	6503	-1.09812715744217	-1.45719322081368	7.60142321735372
16496	chr2	+	ENSG00000224165.1	processed_transcript,processed_transcript,	lincRNA	0.848586	0.49634	61973	25194995	25262563	67569	lincRNA	NOVEL	AC013267.2	processed_transcript	AC013267.2-004	25194995	2	6519	1.344926	6519	1	1	-49	6	0.125	0.125	0.075	40	NA	NA	NA	+	0	NA	NA	NA	NA	NA	NA	NA	NA	NA	NA	0.435312937	6504	0.427526795555126	-1.21960254860546	8.50228449562276
16584	chr2	-	ENSG00000084754.6	retained_intron,	protein_coding	0.15911	0.347438	62063	26434966	26437962	2997	protein_coding	KNOWN	HADHA	retained_intron	HADHA-002	26437962	2	6555	0.253274	6555	1	0	NA	NA	NA	NA	NA	NA	NA	NA	NA	NA	0	NA	NA	NA	NA	NA	NA	NA	NA	NA	NA	0.429714057	6540	-1.98122911099252	-5.58720326112291	2.25821981277311
16586	chr2	+	ENSG00000138029.9	protein_coding,	protein_coding	0	0.049634	62065	26466038	26501488	35451	protein_coding	KNOWN	HADHB	protein_coding	HADHB-007	26466038	2	6556	0.024817	6556	1	0	NA	NA	NA	NA	NA	NA	NA	NA	NA	NA	1	1912.5	4	0.095238095	0.095238095	0	21	NA	NA	NA	-	0.403919216	6541	-5.33252746377914	-5.36284047137832	6.09424464691892
16587	chr2	-	ENSG00000084754.6	protein_coding,	protein_coding	97.7996	84.4771	62066	26434806	26467475	32670	protein_coding	KNOWN	HADHA	protein_coding	HADHA-201	26467475	2	6557	91.13835	6557	1	1	-475.5	4	0.095238095	0.095238095	0	21	NA	NA	NA	-	0	NA	NA	NA	NA	NA	NA	NA	NA	NA	NA	0.441711658	6542	6.50998634663827	-2.1629384049152	7.59901128988885
16600	chr2	-	ENSG00000173567.10	processed_transcript,	protein_coding	2.75791	2.13426	62079	26531041	26568670	37630	protein_coding	KNOWN	GPR113	processed_transcript	GPR113-003	26568670	2	6560	2.446085	6560	1	3	-520.5|-641.5|-1419.5	4|5|4	0.185185185185185|0.0606060606060606|0.24	0.148148148148148|0.121212121212121|0.08	0|0.181818181818182|0.04	27|33|25	7|NA|NA	4|NA|NA	3|NA|NA	-|+|-	0	NA	NA	NA	NA	NA	NA	NA	NA	NA	NA	0.450109978	6545	1.29047453753161	-2.0415596619013	8.50098688586356
16603	chr2	+	ENSG00000138018.13	protein_coding,	protein_coding	46.5662	41.7422	62082	26569017	26608007	38991	protein_coding	KNOWN	EPT1	protein_coding	EPT1-004	26569017	2	6561	44.1542	6561	1	0	NA	NA	NA	NA	NA	NA	NA	NA	NA	NA	3	173.5|294.5|1072.5	4|5|4	0.185185185185185|0.0606060606060606|0.24	0.148148148148148|0.121212121212121|0.08	0|0.181818181818182|0.04	27|33|25	7|NA|NA	4|NA|NA	3|NA|NA	-|+|-	0.447310538	6546	5.46447877015584	-2.23242318075315	7.33435737921973
16606	chr2	-	ENSG00000173567.10	nonsense_mediated_decay,protein_coding,	protein_coding	0.0530366	0.099268	62085	26531044	26569611	38568	protein_coding	KNOWN	GPR113	nonsense_mediated_decay	GPR113-002	26569611	2	6562	0.1523046	6562	1	1	-478.5	4	0.24	0.08	0.04	25	NA	NA	NA	-	2	420.5|299.5	4|5	0.185185185185185|0.0606060606060606	0.148148148148148|0.121212121212121	0|0.181818181818182	27|33	7|NA	4|NA	3|NA	-|+	0.416316737	6547	-2.71496857921469	-4.265316750519	7.02627340759091
16634	chr2	+	ENSG00000213699.4	protein_coding,	protein_coding	12.5166	17.3223	62116	26987157	27001739	14583	protein_coding	KNOWN	C2orf18	protein_coding	C2orf18-201	26987157	2	6570	29.8389	6570	1	1	-1260	4	0.181818182	0	0.045454545	22	NA	NA	NA	-	0	NA	NA	NA	NA	NA	NA	NA	NA	NA	NA	0.48990202	6555	4.89912244704231	-1.37744065826824	7.45083186596682
16635	chr2	+	ENSG00000213699.4	processed_transcript,	protein_coding	12.5166	17.3223	62117	26987158	27001087	13930	protein_coding	KNOWN	C2orf18	processed_transcript	C2orf18-004	26987158	2	6572	14.91945	6572	1	1	-1261	4	0.181818182	0	0.045454545	22	NA	NA	NA	-	0	NA	NA	NA	NA	NA	NA	NA	NA	NA	NA	0.49010198	6556	3.89912244704231	-1.38044240653373	7.44778417539343
16667	chr2	+	ENSG00000119777.12	protein_coding,protein_coding,	protein_coding	68.3642	59.5608	62149	27255845	27264561	8717	protein_coding	KNOWN	TMEM214	protein_coding	TMEM214-002	27255845	2	6580	127.925	6580	1	2	-1181|-546.5	4|5	0.115384615384615|0.0689655172413793	0.230769230769231|0.0344827586206897	0.0769230769230769|0.137931034482759	26|29	3|NA	7|NA	2|NA	-|+	1	197.5	4	0.130434783	0.217391304	0.086956522	23	2	1	7	-	0.50589882	6564	6.99915442312268	-1.44065108367465	8.26846437892876
16675	chr2	+	ENSG00000084693.11	protein_coding,	protein_coding	0.0530366	0	62159	27265232	27276022	10791	protein_coding	KNOWN	AGBL5	protein_coding	AGBL5-009	27265232	2	6581	0.0265183	6581	1	2	-1824|-906.5	4|4	0.0769230769230769|0.210526315789474	0.192307692307692|0.0526315789473684	0.115384615384615|0	26|19	NA|NA	NA|NA	NA|NA	-|-	0	NA	NA	NA	NA	NA	NA	NA	NA	NA	NA	0.549490102	6565	-5.23686789773981	-4.9478178230115	2.92090456417803
16681	chr2	+	ENSG00000084693.11	retained_intron,protein_coding,	protein_coding	35.1103	35.7861	62165	27274549	27293488	18940	protein_coding	KNOWN	AGBL5	protein_coding	AGBL5-004	27274549	2	6583	70.8964	6583	1	1	-1791	4	0.125	0.25	0.083333333	24	NA	NA	NA	-	3	35|158|356	6|6|4	0.0238095238095238|0|0.111111111111111	0.19047619047619|0.225|0.111111111111111	0.19047619047619|0.05|0.111111111111111	42|40|18	NA|NA|2	NA|NA|1	NA|NA|3	+|-|-	0.50609878	6567	6.14764046658334	-0.92166074627201	5.59915137766407
16684	chr2	-	ENSG00000228474.1	processed_transcript,retained_intron,	processed_transcript	339.01	225.934	62169	27293355	27294517	1163	processed_transcript	NOVEL	OST4	retained_intron	OST4-003	27294517	2	6585	564.944	6585	1	3	-388.5|-439|-619	5|4|4	0.148148148148148|0.208333333333333|0.136363636363636	0.185185185185185|0.166666666666667|0	0.037037037037037|0.0416666666666667|0.0909090909090909	27|24|22	NA|3|2	NA|3|4	NA|6|1	-|-|-	0	NA	NA	NA	NA	NA	NA	NA	NA	NA	NA	0.527894421	6569	9.1419640574329	-1.42236181537135	7.94160643681416
16690	chr2	+	ENSG00000138030.8	processed_transcript,	protein_coding	59.401	77.4291	62176	27309652	27322769	13118	protein_coding	KNOWN	KHK	processed_transcript	KHK-003	27309652	2	6587	68.41505	6587	1	1	-52.5	7	0.076923077	0.205128205	0.025641026	39	NA	NA	NA	+	0	NA	NA	NA	NA	NA	NA	NA	NA	NA	NA	0.635272945	6571	6.09624182017422	-1.83546596149005	5.4111010554305
16703	chr2	+	ENSG00000143994.9	retained_intron,	protein_coding	0.47733	0.24817	62189	27346682	27352138	5457	protein_coding	KNOWN	ABHD1	retained_intron	ABHD1-005	27346682	2	6589	0.36275	6589	1	0	NA	NA	NA	NA	NA	NA	NA	NA	NA	NA	0	NA	NA	NA	NA	NA	NA	NA	NA	NA	NA	0.523295341	6573	-1.46295248059534	-2.73599455830362	5.73296399285013
16712	chr2	-	ENSG00000138073.8	retained_intron,	protein_coding	156.14	166.671	62201	27353624	27357497	3874	protein_coding	KNOWN	PREB	retained_intron	PREB-005	27357497	2	6590	161.4055	6590	1	0	NA	NA	NA	NA	NA	NA	NA	NA	NA	NA	2	1528|411	4|4	0.136363636363636|0	0.0454545454545455|0.192307692307692	0.227272727272727|0.0769230769230769	22|26	6|NA	3|NA	1|NA	-|-	0.566086783	6574	7.3345459300232	-0.267251476196918	8.26710508273522
16721	chr2	-	ENSG00000236099.1	unprocessed_pseudogene,	pseudogene	0.0530366	0	62210	27381431	27382097	667	pseudogene	KNOWN	AC013403.13	unprocessed_pseudogene	AC013403.13-001	27382097	2	6594	0.0265183	6594	1	2	-72.5|-242.5	6|4	0.116279069767442|0.0476190476190476	0.186046511627907|0	0.116279069767442|0.238095238095238	43|21	NA|3	NA|3	NA|3	-|-	1	369	5	0.142857143	0.071428571	0.071428571	28	NA	NA	NA	+	0.465906819	6578	-5.23686789773981	-3.90614776430934	3.80690222870988
16729	chr2	-	ENSG00000138074.9	protein_coding,	protein_coding	48.6876	62.6878	62218	27429762	27434661	4900	protein_coding	KNOWN	SLC5A6	protein_coding	SLC5A6-006	27434661	2	6595	55.6877	6595	1	3	-35|-182.5|-530	5|7|4	0.142857142857143|0.0487804878048781|0	0.107142857142857|0.268292682926829|0.272727272727273	0|0|0	28|41|22	NA|NA|NA	NA|NA|NA	NA|NA|NA	-|-|+	1	92.5	4	0.217391304	0	0.130434783	23	3	6	2	-	0.471305739	6579	5.79928680290895	-1.26916093752097	7.50619576476127
16735	chr2	+	ENSG00000138085.11	retained_intron,	protein_coding	0.79555	1.09195	62224	27435045	27436301	1257	protein_coding	KNOWN	C2orf28	retained_intron	C2orf28-006	27435045	2	6598	0.94375	6598	1	3	-476.5|-349|-201.5	4|5|7	0.217391304347826|0.142857142857143|0.0487804878048781	0|0.107142857142857|0.268292682926829	0.130434782608696|0|0	23|28|41	3|NA|NA	6|NA|NA	2|NA|NA	-|-|-	1	146	4	0	0.272727273	0	22	NA	NA	NA	+	0.532293541	6582	-0.0835233555622835	-1.55469277047179	8.44022303656182
16736	chr2	-	ENSG00000138074.9	protein_coding,	protein_coding	51.0743	54.8952	62225	27430283	27435130	4848	protein_coding	KNOWN	SLC5A6	protein_coding	SLC5A6-005	27435130	2	6599	52.98475	6599	1	1	-61	4	0	0.272727273	0	22	NA	NA	NA	+	3	561.5|434|286.5	4|5|7	0.217391304347826|0.142857142857143|0.0487804878048781	0|0.107142857142857|0.268292682926829	0.130434782608696|0|0	23|28|41	3|NA|NA	6|NA|NA	2|NA|NA	-|-|-	0.447110578	6583	5.72750527974748	-1.33751735229506	5.64488327010675
16738	chr2	+	ENSG00000138085.11	protein_coding,	protein_coding	189.871	153.27	62227	27435238	27440046	4809	protein_coding	KNOWN	C2orf28	protein_coding	C2orf28-002	27435238	2	6600	171.5705	6600	1	4	-669.5|-542|-394.5|-47	4|5|7|4	0.217391304347826|0.142857142857143|0.0487804878048781|0	0|0.107142857142857|0.268292682926829|0.272727272727273	0.130434782608696|0|0|0	23|28|41|22	3|NA|NA|NA	6|NA|NA|NA	2|NA|NA|NA	-|-|-|+	0	NA	NA	NA	NA	NA	NA	NA	NA	NA	NA	0.537692462	6584	7.42265770553551	-1.38194551510054	8.33592624153335
16740	chr2	-	ENSG00000138074.9	protein_coding,	protein_coding	0	0.099268	62229	27430403	27435645	5243	protein_coding	KNOWN	SLC5A6	protein_coding	SLC5A6-011	27435645	2	6601	0.049634	6601	1	0	NA	NA	NA	NA	NA	NA	NA	NA	NA	NA	4	1076.5|949|801.5|454	4|5|7|4	0.217391304347826|0.142857142857143|0.0487804878048781|0	0|0.107142857142857|0.268292682926829|0.272727272727273	0.130434782608696|0|0|0	23|28|41|22	3|NA|NA|NA	6|NA|NA|NA	2|NA|NA|NA	-|-|-|+	0.453509298	6585	-4.33252746377914	-3.96350926764621	8.7506909128062
16741	chr2	+	ENSG00000138085.11	protein_coding,	protein_coding	0	0.049634	62230	27435734	27438534	2801	protein_coding	KNOWN	C2orf28	protein_coding	C2orf28-003	27435734	2	6602	0.024817	6602	1	4	-1165.5|-1038|-890.5|-543	4|5|7|4	0.217391304347826|0.142857142857143|0.0487804878048781|0	0|0.107142857142857|0.268292682926829|0.272727272727273	0.130434782608696|0|0|0	23|28|41|22	3|NA|NA|NA	6|NA|NA|NA	2|NA|NA|NA	-|-|-|+	0	NA	NA	NA	NA	NA	NA	NA	NA	NA	NA	0.538292342	6586	-5.33252746377914	-3.95453462626002	6.63225087593884
16744	chr2	+	ENSG00000138085.11	retained_intron,	protein_coding	1.27288	1.63792	62233	27436063	27438282	2220	protein_coding	KNOWN	C2orf28	retained_intron	C2orf28-004	27436063	2	6604	1.4554	6604	1	4	-1494.5|-1367|-1219.5|-872	4|5|7|4	0.217391304347826|0.142857142857143|0.0487804878048781|0	0|0.107142857142857|0.268292682926829|0.272727272727273	0.130434782608696|0|0|0	23|28|41|22	3|NA|NA|NA	6|NA|NA|NA	2|NA|NA|NA	-|-|-|+	0	NA	NA	NA	NA	NA	NA	NA	NA	NA	NA	0.534893021	6588	0.541415715819093	-4.5294558266246	4.91515793342318
16747	chr2	+	ENSG00000084774.8	protein_coding,	protein_coding	1.43199	0.99268	62236	27440276	27466653	26378	protein_coding	KNOWN	CAD	protein_coding	CAD-002	27440276	2	6605	1.212335	6605	1	1	-82	5	0.1	0.2	0.033333333	30	NA	NA	NA	-	0	NA	NA	NA	NA	NA	NA	NA	NA	NA	NA	0.447710458	6589	0.277788408429604	-2.61527813037798	5.42170831389625
16772	chr2	+	ENSG00000138100.8	protein_coding,	protein_coding	0.106073	0	62262	27505260	27530303	25044	protein_coding	KNOWN	TRIM54	protein_coding	TRIM54-002	27505260	2	6610	0.0530365	6610	1	1	-1698.5	4	0.176470588	0	0	17	NA	NA	NA	-	1	520	4	0.136363636	0.181818182	0.045454545	22	NA	NA	NA	+	0.476904619	6594	-4.23687061793002	-4.69148532257826	4.79256429756001
16789	chr2	-	ENSG00000115204.9	retained_intron,protein_coding,retained_intron,	protein_coding	45.1342	33.0563	62281	27538583	27545964	7382	protein_coding	KNOWN	MPV17	protein_coding	MPV17-018	27545964	2	6614	117.28575	6614	1	1	-1624	4	0.2	0	0.2	20	6	1	1	+	1	492	5	0.285714286	0.071428571	0.035714286	28	NA	NA	NA	-	0.479104179	6598	6.87388392903044	-1.97766197459025	8.41628580057074
16799	chr2	+	ENSG00000234072.1	processed_transcript,	lincRNA	2.06843	0.694876	62294	27579113	27583123	4011	lincRNA	NOVEL	AC074117.10	processed_transcript	AC074117.10-001	27579113	2	6618	1.381653	6618	1	0	NA	NA	NA	NA	NA	NA	NA	NA	NA	NA	0	NA	NA	NA	NA	NA	NA	NA	NA	NA	NA	0.423515297	6602	0.4663953306044	-3.89322823546028	7.91698773273103
16801	chr2	-	ENSG00000115207.8	protein_coding,	protein_coding	36.6483	38.1189	62296	27565858	27579634	13777	protein_coding	KNOWN	GTF3C2	protein_coding	GTF3C2-003	27579634	2	6619	37.3836	6619	1	0	NA	NA	NA	NA	NA	NA	NA	NA	NA	NA	0	NA	NA	NA	NA	NA	NA	NA	NA	NA	NA	0.518296341	6603	5.22433360062279	-2.60120305790615	7.8674171621943
16817	chr2	+	ENSG00000115234.6	nonsense_mediated_decay,protein_coding,	protein_coding	99.9741	98.2257	62313	27593484	27599994	6511	protein_coding	KNOWN	SNX17	nonsense_mediated_decay	SNX17-002	27593484	2	6622	198.1998	6622	1	0	NA	NA	NA	NA	NA	NA	NA	NA	NA	NA	2	226.5|1898	5|6	0.148148148148148|0.289473684210526	0.185185185185185|0.0789473684210526	0.037037037037037|0.0526315789473684	27|38	NA|NA	NA|NA	NA|NA	+|+	0.513497301	6606	7.63081169650118	-2.44143060353471	8.13234448001718
16828	chr2	-	ENSG00000163795.9	protein_coding,	protein_coding	6.15225	5.36047	62324	27600098	27603592	3495	protein_coding	KNOWN	ZNF513	protein_coding	ZNF513-001	27603592	2	6623	5.75636	6623	1	0	NA	NA	NA	NA	NA	NA	NA	NA	NA	NA	2	1871|58	4|5	0.0833333333333333|0.0588235294117647	0.125|0.323529411764706	0.0416666666666667|0.0294117647058824	24|34	5|NA	2|NA	1|NA	-|-	0.5054989	6607	2.52515682035719	-2.50388739124461	5.3954469833562
16871	chr2	-	ENSG00000115226.5	protein_coding,	protein_coding	1.32592	2.43207	62372	27714750	27718112	3363	protein_coding	KNOWN	FNDC4	protein_coding	FNDC4-001	27718112	2	6634	1.878995	6634	1	1	-50	4	0.136363636	0.045454545	0.045454545	22	NA	NA	NA	-	1	413	5	0.09375	0.25	0.03125	32	NA	NA	NA	-	0.475704859	6618	0.909961227755945	-3.5112628376354	4.74196352056
16873	chr2	+	ENSG00000084734.4	protein_coding,nonsense_mediated_decay,	protein_coding	7.15995	9.72827	62374	27719715	27724030	4316	protein_coding	KNOWN	GCKR	nonsense_mediated_decay	GCKR-003	27719715	2	6635	16.88822	6635	1	1	-1553	4	0.136363636	0.045454545	0.045454545	22	NA	NA	NA	-	0	NA	NA	NA	NA	NA	NA	NA	NA	NA	NA	0.549690062	6619	4.077945372553	-2.87725040026647	5.97215059036252
16880	chr2	+	ENSG00000243943.3	protein_coding,protein_coding,	protein_coding	35.5876	38.8138	62383	27805897	27845963	40067	protein_coding	KNOWN	ZNF512	protein_coding	ZNF512-001	27805897	2	6639	74.4014	6639	1	2	-360|-147.5	3|4	0.166666666666667|0.16	0.0416666666666667|0.2	0.0833333333333333|0.12	24|25	NA|4	NA|7	NA|1	+|-	0	NA	NA	NA	NA	NA	NA	NA	NA	NA	NA	0.486902619	6623	6.21725786345258	-1.6393502510351	7.21095385873457
16888	chr2	+	ENSG00000198522.8	protein_coding,protein_coding,protein_coding,	protein_coding	0.0530366	0	62391	27851515	27873711	22197	protein_coding	KNOWN	GPN1	protein_coding	GPN1-009	27851515	2	6640	0.0795549	6640	1	0	NA	NA	NA	NA	NA	NA	NA	NA	NA	NA	0	NA	NA	NA	NA	NA	NA	NA	NA	NA	NA	0.400719856	6624	-3.65190539701865	-4.0806736582591	6.01552450940725
16892	chr2	+	ENSG00000198522.8	protein_coding,	protein_coding	20.6843	25.1148	62395	27851863	27874375	22513	protein_coding	KNOWN	GPN1	protein_coding	GPN1-001	27851863	2	6642	22.89955	6642	1	0	NA	NA	NA	NA	NA	NA	NA	NA	NA	NA	0	NA	NA	NA	NA	NA	NA	NA	NA	NA	NA	0.412517497	6626	4.51724734302848	-2.3240865407016	7.71021412358805
16893	chr2	-	ENSG00000176714.9	protein_coding,	protein_coding	2.28058	1.38975	62396	27848506	27851879	3374	protein_coding	KNOWN	CCDC121	protein_coding	CCDC121-001	27851879	2	6643	1.835165	6643	1	0	NA	NA	NA	NA	NA	NA	NA	NA	NA	NA	0	NA	NA	NA	NA	NA	NA	NA	NA	NA	NA	0.429114177	6627	0.875909781858737	-2.62592536203125	6.33542620714975
16895	chr2	+	ENSG00000198522.8	retained_intron,	protein_coding	55.3172	62.4396	62398	27851919	27854507	2589	protein_coding	KNOWN	GPN1	retained_intron	GPN1-007	27851919	2	6644	58.8784	6644	1	0	NA	NA	NA	NA	NA	NA	NA	NA	NA	NA	0	NA	NA	NA	NA	NA	NA	NA	NA	NA	NA	0.416116777	6628	5.87966656208003	-2.356228761565	7.69280662310018
16898	chr2	+	ENSG00000163798.9	protein_coding,	protein_coding	2.06843	1.09195	62401	27886338	27917836	31499	protein_coding	KNOWN	SLC4A1AP	protein_coding	SLC4A1AP-001	27886338	2	6646	1.58019	6646	1	0	NA	NA	NA	NA	NA	NA	NA	NA	NA	NA	0	NA	NA	NA	NA	NA	NA	NA	NA	NA	NA	0.401719656	6630	0.660098036616093	-3.00114307180705	7.36248396175702
16900	chr2	-	ENSG00000119760.11	protein_coding,protein_coding,	protein_coding	23.3361	16.1311	62403	27875930	27886506	10577	protein_coding	KNOWN	SUPT7L	protein_coding	SUPT7L-003	27886506	2	6647	39.4672	6647	1	0	NA	NA	NA	NA	NA	NA	NA	NA	NA	NA	0	NA	NA	NA	NA	NA	NA	NA	NA	NA	NA	0.435912817	6631	5.30258226576763	-3.58379154922271	7.77323421131216
16905	chr2	+	ENSG00000243147.3	protein_coding,protein_coding,	protein_coding	150.571	115.449	62409	27994584	28002608	8025	protein_coding	KNOWN	MRPL33	protein_coding	MRPL33-001	27994584	2	6650	266.02	6650	1	0	NA	NA	NA	NA	NA	NA	NA	NA	NA	NA	0	NA	NA	NA	NA	NA	NA	NA	NA	NA	NA	0.469506099	6634	8.05539090473479	-1.60822783496668	7.5698951348659
16913	chr2	-	ENSG00000171174.9	nonsense_mediated_decay,	protein_coding	32.9358	29.3833	62418	28004440	28113233	108794	protein_coding	KNOWN	RBKS	nonsense_mediated_decay	RBKS-002	28113233	2	6653	31.15955	6653	1	1	-345.5	5	0.085714286	0.228571429	0.028571429	35	NA	NA	NA	+	0	NA	NA	NA	NA	NA	NA	NA	NA	NA	NA	0.427114577	6637	4.96160249332365	-2.03504100722849	6.49011454658136
16921	chr2	-	ENSG00000171174.9	protein_coding,	protein_coding	0	0.049634	62426	28004231	28113965	109735	protein_coding	KNOWN	RBKS	protein_coding	RBKS-001	28113965	2	6655	0.024817	6655	1	0	NA	NA	NA	NA	NA	NA	NA	NA	NA	NA	1	386.5	5	0.085714286	0.228571429	0.028571429	35	NA	NA	NA	+	0.379924015	6639	-5.33252746377914	-4.12781580591735	6.24467414023148
16923	chr2	+	ENSG00000158019.14	protein_coding,	protein_coding	0	0.099268	62428	28236238	28561765	325528	protein_coding	KNOWN	BRE	protein_coding	BRE-201	28236238	2	6656	0.049634	6656	1	0	NA	NA	NA	NA	NA	NA	NA	NA	NA	NA	0	NA	NA	NA	NA	NA	NA	NA	NA	NA	NA	0.382923415	6640	-4.33252746377914	-5.62230535275432	2.17749407102198
16929	chr2	-	ENSG00000229951.1	processed_transcript,processed_transcript,	lincRNA	0.106073	0.148902	62434	28607276	28617539	10264	lincRNA	NOVEL	AC104695.3	processed_transcript	AC104695.3-001	28617539	2	6660	0.254975	6660	1	1	-260	5	0.107142857	0.142857143	0.142857143	28	NA	NA	NA	+	5	1992.5|1665|698.5|523|91.5	4|8|3|3|4	0.0952380952380952|0.0740740740740741|0.105263157894737|0.0416666666666667|0.130434782608696	0.142857142857143|0.240740740740741|0|0.0416666666666667|0.0434782608695652	0.0476190476190476|0.0925925925925926|0.0526315789473684|0.0416666666666667|0.0869565217391304	21|54|19|24|23	NA|NA|NA|NA|NA	NA|NA|NA|NA|NA	NA|NA|NA|NA|NA	+|+|-|-|+	0.464907019	6644	-1.97157229542733	-4.62234087158769	6.6722726907563
16931	chr2	+	ENSG00000075426.7	protein_coding,	protein_coding	0.265183	0.148902	62436	28618579	28635354	16776	protein_coding	KNOWN	FOSL2	protein_coding	FOSL2-201	28618579	2	6661	0.2070425	6661	1	4	-1738.5|-1563|-1131.5|-780	3|3|4|5	0.105263157894737|0.0416666666666667|0.130434782608696|0.107142857142857	0|0.0416666666666667|0.0434782608695652|0.142857142857143	0.0526315789473684|0.0416666666666667|0.0869565217391304|0.142857142857143	19|24|23|28	NA|NA|NA|NA	NA|NA|NA|NA	NA|NA|NA|NA	-|-|+|+	0	NA	NA	NA	NA	NA	NA	NA	NA	NA	NA	0.604279144	6645	-2.27200115206261	-4.61172005215782	6.55862900205026
16963	chr2	-	ENSG00000171103.6	nonsense_mediated_decay,	protein_coding	15.4337	16.8259	62474	29072706	29093161	20456	protein_coding	KNOWN	TRMT61B	nonsense_mediated_decay	TRMT61B-002	29093161	2	6671	16.1298	6671	1	1	-543.5	4	0.086956522	0.043478261	0.130434783	23	NA	NA	NA	-	0	NA	NA	NA	NA	NA	NA	NA	NA	NA	NA	0.450109978	6655	4.01165664492481	-0.840884904037778	7.48784328278068
17008	chr2	+	ENSG00000119801.8	protein_coding,protein_coding,	protein_coding	27.6851	29.5322	62520	30369807	30383399	13593	protein_coding	KNOWN	YPEL5	protein_coding	YPEL5-003	30369807	2	6689	57.2173	6689	1	1	-160	4	0.090909091	0.045454545	0.090909091	22	NA	NA	NA	+	3	691.5|737|774	4|3|4	0|0.2|0.0769230769230769	0.260869565217391|0.05|0.192307692307692	0.130434782608696|0|0.115384615384615	23|20|26	6|NA|6	2|NA|5	3|NA|1	-|-|-	0.428114377	6673	5.83837951550345	-1.49817464450369	7.46007749349824
17066	chr2	+	ENSG00000013016.10	protein_coding,	protein_coding	0	0.049634	62580	31456880	31491260	34381	protein_coding	KNOWN	EHD3	protein_coding	EHD3-201	31456880	2	6708	0.024817	6708	1	0	NA	NA	NA	NA	NA	NA	NA	NA	NA	NA	0	NA	NA	NA	NA	NA	NA	NA	NA	NA	NA	0.412917417	6692	-5.33252746377914	-2.53448725005852	3.75770686098371
17093	chr2	-	ENSG00000162961.9	protein_coding,nonsense_mediated_decay,	protein_coding	43.1188	33.6022	62609	32249171	32264874	15704	protein_coding	KNOWN	DPY30	protein_coding	DPY30-002	32264874	2	6721	76.721	6721	1	0	NA	NA	NA	NA	NA	NA	NA	NA	NA	NA	2	1377.5|229.5	5|5	0.189189189189189|0.0344827586206897	0.0540540540540541|0.103448275862069	0.027027027027027|0.103448275862069	37|29	NA|NA	NA|NA	NA|NA	+|-	0.435912817	6705	6.26154961980074	-1.94452109102248	5.76593801914229
17096	chr2	+	ENSG00000021574.7	protein_coding,	protein_coding	4.82633	4.06999	62612	32288776	32382706	93931	protein_coding	KNOWN	SPAST	protein_coding	SPAST-001	32288776	2	6722	4.44816	6722	1	0	NA	NA	NA	NA	NA	NA	NA	NA	NA	NA	0	NA	NA	NA	NA	NA	NA	NA	NA	NA	NA	0.463307339	6706	2.15320868263314	-1.64836711850055	5.35438191689657
17098	chr2	+	ENSG00000152683.10	nonsense_mediated_decay,protein_coding,protein_coding,protein_coding,nonsense_mediated_decay,protein_coding,protein_coding,protein_coding,	protein_coding	22.8058	24.5192	62614	32390933	32449448	58516	protein_coding	KNOWN	SLC30A6	protein_coding	SLC30A6-001	32390933	2	6724	189.3	6724	1	0	NA	NA	NA	NA	NA	NA	NA	NA	NA	NA	0	NA	NA	NA	NA	NA	NA	NA	NA	NA	NA	0.453909218	6708	7.56453060081634	-1.84269229900507	7.62512147238018
17106	chr2	+	ENSG00000119820.5	protein_coding,	protein_coding	36.171	31.6169	62622	32502979	32537002	34024	protein_coding	KNOWN	YIPF4	protein_coding	YIPF4-001	32502979	2	6728	33.89395	6728	1	0	NA	NA	NA	NA	NA	NA	NA	NA	NA	NA	0	NA	NA	NA	NA	NA	NA	NA	NA	NA	NA	0.433313337	6712	5.08295587314741	-1.62370519033019	7.60655776892327
17122	chr2	+	ENSG00000018699.7	protein_coding,	protein_coding	9.86482	11.1677	62641	32853129	33046118	192990	protein_coding	KNOWN	TTC27	protein_coding	TTC27-001	32853129	2	6734	10.51626	6734	1	3	-973.5|-941.5|-73.5	5|4|4	0.260869565217391|0.2|0.185185185185185	0|0|0.0740740740740741	0|0|0.111111111111111	23|15|27	NA|1|NA	NA|1|NA	NA|1|NA	-|-|-	0	NA	NA	NA	NA	NA	NA	NA	NA	NA	NA	0.463107379	6718	3.39454981103866	-1.69012074234028	7.20121437909941
17143	chr2	+	ENSG00000049323.10	protein_coding,	protein_coding	0	0.049634	62665	33516715	33623755	107041	protein_coding	KNOWN	LTBP1	protein_coding	LTBP1-201	33516715	2	6743	0.024817	6743	1	0	NA	NA	NA	NA	NA	NA	NA	NA	NA	NA	0	NA	NA	NA	NA	NA	NA	NA	NA	NA	NA	0.412317536	6727	-5.33252746377914	-4.46431327317396	2.98921313282493
17153	chr2	+	ENSG00000152689.13	retained_intron,	protein_coding	0	0.049634	62675	33701664	33741855	40192	protein_coding	KNOWN	RASGRP3	retained_intron	RASGRP3-011	33701664	2	6745	0.024817	6745	1	1	-553.5	4	0.24137931	0.103448276	0.103448276	29	NA	NA	NA	-	0	NA	NA	NA	NA	NA	NA	NA	NA	NA	NA	0.446310738	6729	-5.33252746377914	-3.76021585227603	3.67820807551638
17169	chr2	-	ENSG00000119812.13	protein_coding,protein_coding,	protein_coding	46.301	39.5087	62692	33808737	33824358	15622	protein_coding	KNOWN	FAM98A	protein_coding	FAM98A-004	33824358	2	6749	85.8097	6749	1	0	NA	NA	NA	NA	NA	NA	NA	NA	NA	NA	0	NA	NA	NA	NA	NA	NA	NA	NA	NA	NA	0.412717457	6733	6.42306883528016	-1.10873326437716	7.59092839597703
17223	chr2	-	ENSG00000115808.6	protein_coding,	protein_coding	0.106073	0.198536	62752	37075472	37193606	118135	protein_coding	KNOWN	STRN	protein_coding	STRN-201	37193606	2	6776	0.1523045	6776	1	3	-328.5|-363.5|-1536	4|5|3	0.0740740740740741|0|0.222222222222222	0.185185185185185|0.259259259259259|0	0.037037037037037|0.037037037037037|0	27|27|18	NA|NA|NA	NA|NA|NA	NA|NA|NA	+|+|-	2	363|298	5|6	0.0769230769230769|0.157894736842105	0.153846153846154|0.105263157894737	0.115384615384615|0.0263157894736842	26|38	NA|NA	NA|NA	NA|NA	+|+	0.484503099	6760	-2.71496952645825	-1.56319423075172	4.85541208399595
17229	chr2	-	ENSG00000008869.6	protein_coding,protein_coding,protein_coding,	protein_coding	6.15225	6.89913	62759	37208040	37311485	103446	protein_coding	KNOWN	HEATR5B	protein_coding	HEATR5B-001	37311485	2	6777	19.57707	6777	1	0	NA	NA	NA	NA	NA	NA	NA	NA	NA	NA	0	NA	NA	NA	NA	NA	NA	NA	NA	NA	NA	0.420515897	6761	4.29109295519271	-1.21591150069922	7.17207947497858
17245	chr2	+	ENSG00000218739.4	protein_coding,protein_coding,	protein_coding	114.718	107.904	62775	37423631	37440868	17238	protein_coding	NOVEL	AC007390.5	protein_coding	AC007390.5-007	37423631	2	6785	222.622	6785	1	1	-1620.5	7	0.222222222	0	0	27	NA	NA	NA	-	2	324|1925	7|4	0.1875|0.115384615384615	0.208333333333333|0	0.0416666666666667|0.192307692307692	48|26	NA|NA	NA|NA	NA|NA	+|+	0.441911618	6769	7.79845235982465	-1.99251171949466	7.56216917723445
17255	chr2	-	ENSG00000115816.8	protein_coding,	protein_coding	28.0564	30.2271	62785	37429954	37458739	28786	protein_coding	KNOWN	CEBPZ	protein_coding	CEBPZ-201	37458739	2	6789	29.14175	6789	1	1	-251	4	0.142857143	0.178571429	0.107142857	28	NA	NA	NA	+	0	NA	NA	NA	NA	NA	NA	NA	NA	NA	NA	0.461707658	6773	4.86501561060529	-2.03385894183263	7.61913426440589
17258	chr2	+	ENSG00000003509.11	protein_coding,	protein_coding	31.0264	29.5819	62788	37458809	37476303	17495	protein_coding	KNOWN	C2orf56	protein_coding	C2orf56-001	37458809	2	6790	30.30415	6790	1	0	NA	NA	NA	NA	NA	NA	NA	NA	NA	NA	1	181	4	0.142857143	0.178571429	0.107142857	28	NA	NA	NA	+	0.401719656	6774	4.92144347190056	-1.97482374423165	7.92975319709572
17262	chr2	+	ENSG00000003509.11	protein_coding,retained_intron,	protein_coding	0.31822	0.24817	62792	37458910	37468771	9862	protein_coding	KNOWN	C2orf56	protein_coding	C2orf56-007	37458910	2	6792	0.56639	6792	1	0	NA	NA	NA	NA	NA	NA	NA	NA	NA	NA	1	80	4	0.142857143	0.178571429	0.107142857	28	NA	NA	NA	+	0.406918616	6776	-0.820132301002058	-2.44064715739854	7.56415260052818
17282	chr2	+	ENSG00000115828.11	protein_coding,	protein_coding	0.212147	0.99268	62813	37571852	37600464	28613	protein_coding	KNOWN	QPCT	protein_coding	QPCT-201	37571852	2	6796	0.6024135	6796	1	0	NA	NA	NA	NA	NA	NA	NA	NA	NA	NA	1	537	4	0.03125	0.21875	0.125	32	NA	NA	NA	+	0.422515497	6780	-0.731173993926627	-2.97595271826367	3.40037507612146
17342	chr2	+	ENSG00000213553.3	pseudogene,	pseudogene	8.06157	5.60864	62874	38708920	38710012	1093	pseudogene	KNOWN	RPLP0P6	pseudogene	RPLP0P6-201	38708920	2	6821	6.835105	6821	1	0	NA	NA	NA	NA	NA	NA	NA	NA	NA	NA	0	NA	NA	NA	NA	NA	NA	NA	NA	NA	NA	0.472505499	6805	2.77296350049641	-5.81189785194903	3.93549822816491
17347	chr2	-	ENSG00000143889.10	nonsense_mediated_decay,	protein_coding	1.32592	0.694876	62881	38790650	38818783	28134	protein_coding	KNOWN	HNRPLL	nonsense_mediated_decay	HNRPLL-005	38818783	2	6823	1.010398	6823	1	0	NA	NA	NA	NA	NA	NA	NA	NA	NA	NA	0	NA	NA	NA	NA	NA	NA	NA	NA	NA	NA	0.399120176	6807	0.01492368854438	-5.9125859893379	2.42653529477777
17367	chr2	-	ENSG00000115875.13	protein_coding,protein_coding,	protein_coding	39.3532	38.3671	62905	38971831	38978503	6673	protein_coding	KNOWN	SRSF7	protein_coding	SRSF7-201	38978503	2	6828	77.7203	6828	1	1	-221	4	0.2	0.1	0.033333333	30	NA	NA	NA	-	3	869.5|428.5|297.5	5|4|4	0.0645161290322581|0.037037037037037|0.172413793103448	0.225806451612903|0.148148148148148|0.103448275862069	0.129032258064516|0|0.103448275862069	31|27|29	NA|NA|7	NA|NA|4	NA|NA|5	-|+|-	0.473505299	6812	6.28021956461758	-2.37182558115826	8.22449769476145
17375	chr2	+	ENSG00000152147.5	protein_coding,	protein_coding	42.0581	37.6226	62913	39005352	39009089	3738	protein_coding	KNOWN	GEMIN6	protein_coding	GEMIN6-002	39005352	2	6832	39.84035	6832	1	0	NA	NA	NA	NA	NA	NA	NA	NA	NA	NA	0	NA	NA	NA	NA	NA	NA	NA	NA	NA	NA	0.452109578	6816	5.31615841651641	-2.54961165974678	6.99148564996763
17378	chr2	-	ENSG00000163214.14	retained_intron,	protein_coding	0.15911	0.099268	62916	39033546	39046104	12559	protein_coding	KNOWN	DHX57	retained_intron	DHX57-006	39046104	2	6835	0.129189	6835	1	0	NA	NA	NA	NA	NA	NA	NA	NA	NA	NA	0	NA	NA	NA	NA	NA	NA	NA	NA	NA	NA	0.398720256	6819	-2.9524448601578	-5.60816186416941	2.89886772505352
17383	chr2	-	ENSG00000163214.14	protein_coding,retained_intron,	protein_coding	4.7733	5.41011	62923	39065924	39103021	37098	protein_coding	KNOWN	DHX57	protein_coding	DHX57-201	39103021	2	6837	10.18341	6837	1	0	NA	NA	NA	NA	NA	NA	NA	NA	NA	NA	1	347.5	3	0	0.157894737	0	19	NA	NA	NA	-	0.406518696	6821	3.34814883570318	-1.59858365966499	6.36517473040264
17388	chr2	+	ENSG00000188010.8	protein_coding,nonsense_mediated_decay,	protein_coding	13.3652	12.2596	62928	39103132	39109787	6656	protein_coding	KNOWN	MORN2	protein_coding	MORN2-004	39103132	2	6838	25.6248	6838	1	1	-458.5	3	0	0.157894737	0	19	NA	NA	NA	-	0	NA	NA	NA	NA	NA	NA	NA	NA	NA	NA	0.423115377	6822	4.67946883940265	-1.61484068622207	6.25206756711926
17412	chr2	-	ENSG00000205111.4	protein_coding,protein_coding,	protein_coding	0.0530366	0	62954	39405688	39456673	50986	protein_coding	KNOWN	CDKL4	protein_coding	CDKL4-001	39456673	2	6848	0.0530366	6848	1	0	NA	NA	NA	NA	NA	NA	NA	NA	NA	NA	0	NA	NA	NA	NA	NA	NA	NA	NA	NA	NA	0.384323135	6832	-4.23686789773981	-5.62942943516865	3.72403989763596
17439	chr2	+	ENSG00000231312.2	processed_transcript,	processed_transcript	3.02309	1.73719	62981	39744007	39826617	82611	processed_transcript	NOVEL	AC007246.3	processed_transcript	AC007246.3-007	39744007	2	6857	2.38014	6857	1	0	NA	NA	NA	NA	NA	NA	NA	NA	NA	NA	0	NA	NA	NA	NA	NA	NA	NA	NA	NA	NA	0.452109578	6841	1.25104643545147	-4.51949497905161	5.86963477505366
17505	chr2	-	ENSG00000224875.2	processed_transcript,	processed_transcript	0.15911	0.347438	63048	42370378	42397371	26994	processed_transcript	NOVEL	AC083949.1	processed_transcript	AC083949.1-001	42397371	2	6880	0.253274	6880	1	0	NA	NA	NA	NA	NA	NA	NA	NA	NA	NA	3	900.5|649|515.5	4|4|5	0|0.0833333333333333|0.111111111111111	0.19047619047619|0.208333333333333|0.185185185185185	0|0.125|0.037037037037037	21|24|27	NA|NA|NA	NA|NA|NA	NA|NA|NA	+|-|-	0.385322935	6864	-1.98122911099252	-5.27084835700676	7.26956070125179
17507	chr2	+	ENSG00000143924.14	retained_intron,	protein_coding	5.72796	4.21889	63050	42510049	42517053	7005	protein_coding	KNOWN	EML4	retained_intron	EML4-005	42510049	2	6881	4.973425	6881	1	0	NA	NA	NA	NA	NA	NA	NA	NA	NA	NA	0	NA	NA	NA	NA	NA	NA	NA	NA	NA	NA	0.399720056	6865	2.31423972074327	-5.63658887121987	2.45228125127751
17520	chr2	-	ENSG00000171126.7	protein_coding,	protein_coding	0.901623	0.74451	63064	42669172	42721117	51946	protein_coding	KNOWN	KCNG3	protein_coding	KCNG3-002	42721117	2	6887	0.8230665	6887	1	3	-135.5|-264.5|-641	5|5|4	0.121212121212121|0.0967741935483871|0	0.151515151515152|0.161290322580645|0.227272727272727	0.0303030303030303|0.032258064516129|0.0454545454545455	33|31|22	NA|NA|NA	NA|NA|NA	NA|NA|NA	-|+|-	1	436	4	0.033333333	0.233333333	0.1	30	NA	NA	NA	-	0.474305139	6871	-0.280919096385795	-2.12028792601788	6.57351402151174
17522	chr2	+	ENSG00000057935.8	protein_coding,	protein_coding	0.106073	0.148902	63066	42721709	42984087	262379	protein_coding	KNOWN	MTA3	protein_coding	MTA3-005	42721709	2	6888	0.1274875	6888	1	3	-1028|-456.5|-327.5	4|5|5	0.0333333333333333|0.121212121212121|0.0967741935483871	0.233333333333333|0.151515151515152|0.161290322580645	0.1|0.0303030303030303|0.032258064516129	30|33|31	NA|NA|NA	NA|NA|NA	NA|NA|NA	-|-|+	1	49	4	0	0.227272727	0.045454545	22	NA	NA	NA	-	0.528294341	6872	-2.97157229542733	-3.81805018158855	5.39969090969453
17542	chr2	+	ENSG00000057935.8	retained_intron,	protein_coding	1.64414	1.09195	63086	42936215	42950474	14260	protein_coding	KNOWN	MTA3	retained_intron	MTA3-016	42936215	2	6894	1.368045	6894	1	0	NA	NA	NA	NA	NA	NA	NA	NA	NA	NA	0	NA	NA	NA	NA	NA	NA	NA	NA	NA	NA	0.396920616	6878	0.452115686516997	-5.38076163683399	2.5758951076326
17550	chr2	-	ENSG00000162882.10	protein_coding,	protein_coding	3.12916	2.68024	63094	42994229	43019732	25504	protein_coding	KNOWN	HAAO	protein_coding	HAAO-001	43019732	2	6897	2.9047	6897	1	2	-905.5|-1027.5	5|4	0.032258064516129|0.16	0.161290322580645|0.08	0.129032258064516|0.12	31|25	NA|3	NA|7	NA|2	+|+	0	NA	NA	NA	NA	NA	NA	NA	NA	NA	NA	0.463107379	6881	1.53838916849661	-1.69291656629541	6.94664671843363
17552	chr2	-	ENSG00000226491.1	processed_pseudogene,	pseudogene	0	0.049634	63096	43024365	43025852	1488	pseudogene	KNOWN	AC098824.5	processed_pseudogene	AC098824.5-001	43025852	2	6898	0.024817	6898	1	0	NA	NA	NA	NA	NA	NA	NA	NA	NA	NA	0	NA	NA	NA	NA	NA	NA	NA	NA	NA	NA	0.417116577	6882	-5.33252746377914	-5.71778079634229	2.58901307497821
17554	chr2	-	ENSG00000224739.2	processed_transcript,	processed_transcript	0.0530366	0.099268	63098	43228495	43233200	4706	processed_transcript	NOVEL	AC016735.1	processed_transcript	AC016735.1-001	43233200	2	6900	0.0761523	6900	1	3	-484.5|-677.5|-1659	5|4|5	0.103448275862069|0.0645161290322581|0.108695652173913	0.137931034482759|0.193548387096774|0.0869565217391304	0.137931034482759|0.161290322580645|0.239130434782609	29|31|46	NA|NA|NA	NA|NA|NA	NA|NA|NA	-|-|-	0	NA	NA	NA	NA	NA	NA	NA	NA	NA	NA	0.5114977	6884	-3.71496857921469	-4.59419058870343	4.46602724695195
17565	chr2	-	ENSG00000115970.12	retained_intron,	protein_coding	0.212147	0.198536	63109	43514124	43520205	6082	protein_coding	KNOWN	THADA	retained_intron	THADA-016	43520205	2	6908	0.2053415	6908	1	0	NA	NA	NA	NA	NA	NA	NA	NA	NA	NA	0	NA	NA	NA	NA	NA	NA	NA	NA	NA	NA	0.523095381	6892	-2.28390286591299	-5.40500816365979	3.78993869874864
17581	chr2	-	ENSG00000115970.12	protein_coding,protein_coding,protein_coding,	protein_coding	8.37979	9.28156	63127	43457976	43823185	365210	protein_coding	KNOWN	THADA	protein_coding	THADA-202	43823185	2	6910	26.492025	6910	1	1	-9.5	5	0.275862069	0.068965517	0.034482759	29	NA	NA	NA	+	0	NA	NA	NA	NA	NA	NA	NA	NA	NA	NA	0.432513497	6894	4.72748621967454	-1.80994904648279	7.11578663159556
17583	chr2	+	ENSG00000152527.9	protein_coding,	protein_coding	1.06073	1.29048	63129	43864412	43995126	130715	protein_coding	KNOWN	PLEKHH2	protein_coding	PLEKHH2-001	43864412	2	6912	1.175605	6912	1	0	NA	NA	NA	NA	NA	NA	NA	NA	NA	NA	1	240	7	0.172413793	0.189655172	0.034482759	58	NA	NA	NA	+	0.442711458	6896	0.233403400083394	-1.82163078484021	5.30869605036149
17587	chr2	-	ENSG00000223658.4	processed_pseudogene,processed_pseudogene,	pseudogene	0.15911	0.397072	63133	43902517	43903461	945	pseudogene	KNOWN	AC011242.6	processed_pseudogene	AC011242.6-001	43903461	2	6913	0.556182	6913	1	2	-190|-1519	4|3	0|0.1	0.208333333333333|0	0.166666666666667|0.05	24|20	NA|NA	NA|NA	NA|NA	+|-	0	NA	NA	NA	NA	NA	NA	NA	NA	NA	NA	0.450109978	6897	-0.846371040118166	-3.07216721462339	4.697351709778
17594	chr2	+	ENSG00000138036.12	protein_coding,nonsense_mediated_decay,nonsense_mediated_decay,protein_coding,	protein_coding	11.8802	7.84218	63141	44001188	44022318	21131	protein_coding	KNOWN	DYNC2LI1	protein_coding	DYNC2LI1-002	44001188	2	6917	39.44476	6917	1	0	NA	NA	NA	NA	NA	NA	NA	NA	NA	NA	0	NA	NA	NA	NA	NA	NA	NA	NA	NA	NA	0.412717457	6901	5.30176175446389	-2.0800818318857	6.24548821402617
17601	chr2	-	ENSG00000138075.7	nonsense_mediated_decay,	protein_coding	5.14455	3.87145	63149	44039982	44066004	26023	protein_coding	KNOWN	ABCG5	nonsense_mediated_decay	ABCG5-004	44066004	2	6918	4.508	6918	1	0	NA	NA	NA	NA	NA	NA	NA	NA	NA	NA	0	NA	NA	NA	NA	NA	NA	NA	NA	NA	NA	0.49490102	6902	2.17248751551013	-3.36734459700779	6.0384539328659
17602	chr2	+	ENSG00000143921.6	protein_coding,	protein_coding	2.91702	2.97804	63150	44066103	44105605	39503	protein_coding	KNOWN	ABCG8	protein_coding	ABCG8-001	44066103	2	6919	2.94753	6919	1	0	NA	NA	NA	NA	NA	NA	NA	NA	NA	NA	0	NA	NA	NA	NA	NA	NA	NA	NA	NA	NA	0.476904619	6903	1.5595064970493	-3.36883422953522	6.81457615021094
17646	chr2	+	ENSG00000143919.9	protein_coding,protein_coding,	protein_coding	6.9478	7.94144	63197	44589103	44999731	410629	protein_coding	KNOWN	C2orf34	protein_coding	C2orf34-001	44589103	2	6930	14.88924	6930	1	1	-640.5	6	0.146341463	0.073170732	0.097560976	41	NA	NA	NA	+	1	376	4	0.05	0.05	0.15	20	NA	NA	NA	+	0.401719656	6914	3.89619821037796	-1.6241497898206	6.97047647019571
17673	chr2	-	ENSG00000068784.8	protein_coding,	protein_coding	18.9341	13.8975	63227	45615819	45838420	222602	protein_coding	KNOWN	SRBD1	protein_coding	SRBD1-001	45838420	2	6945	16.4158	6945	1	0	NA	NA	NA	NA	NA	NA	NA	NA	NA	NA	0	NA	NA	NA	NA	NA	NA	NA	NA	NA	NA	0.394521096	6929	4.03701315414393	-2.26741992850172	7.00017141620019
17714	chr2	-	ENSG00000250565.2	processed_transcript,	protein_coding	0	0.049634	63268	46755017	46768722	13706	protein_coding	KNOWN	ATP6V1E2	processed_transcript	ATP6V1E2-004	46768722	2	6961	0.024817	6961	1	7	-1062|-1106|-1187|-1250|-1296|-1421|-1800.5	6|4|5|4|4|4|4	0.025|0.125|0.1|0.0454545454545455|0.0416666666666667|0|0.0952380952380952	0.25|0.0833333333333333|0.2|0.227272727272727|0.208333333333333|0.230769230769231|0.0476190476190476	0.05|0|0|0.0454545454545455|0|0.0384615384615385|0.0476190476190476	40|24|30|22|24|26|21	NA|NA|NA|NA|NA|NA|1	NA|NA|NA|NA|NA|NA|1	NA|NA|NA|NA|NA|NA|3	+|-|+|+|-|+|-	1	237.5	4	0.130434783	0.173913043	0.130434783	23	5	1	4	+	0.549090182	6945	-5.33252746377914	-4.25151129834389	4.19143695701287
17728	chr2	-	ENSG00000151665.8	processed_transcript,	protein_coding	138.532	129.197	63285	46839367	46844169	4803	protein_coding	KNOWN	PIGF	processed_transcript	PIGF-003	46844169	2	6969	133.8645	6969	1	1	-82.5	4	0.238095238	0.095238095	0	21	NA	NA	NA	+	1	359.5	4	0.047619048	0.142857143	0.142857143	21	NA	NA	NA	-	0.378124375	6953	7.06462960776044	-1.46872687660433	7.93962627264632
17733	chr2	+	ENSG00000119878.5	protein_coding,	protein_coding	46.1949	37.9204	63290	46844290	46852881	8592	protein_coding	KNOWN	CRIPT	protein_coding	CRIPT-001	46844290	2	6970	42.05765	6970	1	2	-480.5|-38.5	4|4	0.0476190476190476|0.238095238095238	0.142857142857143|0.0952380952380952	0.142857142857143|0	21|21	NA|NA	NA|NA	NA|NA	-|+	0	NA	NA	NA	NA	NA	NA	NA	NA	NA	NA	0.384323135	6954	5.39429633563554	-1.57088860385629	7.61512499595157
17747	chr2	-	ENSG00000180398.7	protein_coding,	protein_coding	273.245	297.109	63305	47129013	47142919	13907	protein_coding	KNOWN	MCFD2	protein_coding	MCFD2-002	47142919	2	6977	285.177	6977	1	1	-41	3	0.033333333	0.1	0.033333333	30	NA	NA	NA	-	1	300	4	0.192307692	0.230769231	0.038461538	26	6	4	2	+	0.452309538	6961	8.15571382049062	-1.63800261672011	8.12309714132595
17762	chr2	-	ENSG00000180398.7	protein_coding,	protein_coding	13.8426	8.63632	63320	47132097	47168871	36775	protein_coding	KNOWN	MCFD2	protein_coding	MCFD2-003	47168871	2	6979	11.23946	6979	1	0	NA	NA	NA	NA	NA	NA	NA	NA	NA	NA	4	987.5|764.5|677|327	4|4|4|6	0.0952380952380952|0.105263157894737|0.0333333333333333|0.0476190476190476	0.238095238095238|0.0526315789473684|0.233333333333333|0.261904761904762	0.0952380952380952|0.0526315789473684|0.0333333333333333|0.0238095238095238	21|19|30|42	3|NA|NA|NA	3|NA|NA|NA	3|NA|NA|NA	+|+|+|-	0.486102779	6963	3.49050081780949	-2.86458595552472	5.76798333476786
17770	chr2	+	ENSG00000068724.10	processed_transcript,	protein_coding	0.15911	0.049634	63330	47261294	47288095	26802	protein_coding	KNOWN	TTC7A	processed_transcript	TTC7A-011	47261294	2	6981	0.104372	6981	1	0	NA	NA	NA	NA	NA	NA	NA	NA	NA	NA	0	NA	NA	NA	NA	NA	NA	NA	NA	NA	NA	0.544291142	6965	-3.26019336458042	-3.21088336282549	5.95265057298897
17784	chr2	-	ENSG00000143933.11	processed_transcript,protein_coding,protein_coding,	protein_coding	671.073	495.943	63345	47387878	47403650	15773	protein_coding	KNOWN	CALM2	protein_coding	CALM2-007	47403650	2	6987	1167.016	6987	1	0	NA	NA	NA	NA	NA	NA	NA	NA	NA	NA	2	822|620.5	4|5	0.0909090909090909|0.0689655172413793	0.0454545454545455|0.241379310344828	0.0454545454545455|0.0344827586206897	22|29	NA|NA	NA|NA	NA|NA	-|-	0.455108978	6971	10.1886086254523	-2.24536218921146	8.82106858972094
[truncated: 6,713 more rows]
[truncated: 9 more columns]
